# Supplementary material for: Mapping cannabis potency in medical and recreational programs in the United States
Source: PLoS One. 2020 Mar 26;15(3):e0230167. doi: 10.1371/journal.pone.0230167 (PMC7098613; doi:10.1371/journal.pone.0230167)
Supplement: S1 Data — (XLSX) [file pone.0230167.s018.xlsx]

## Sheet: New Mexico
Strain	THC	CBD		Strain < 5%	THC	CBD		Strain 5 - 10% THC	THC	CBD		Strain 10-15% THC	THC	CBD		Strain > 15% THC	THC	CBD
Ringo's Gift- NM 13a	0.8	14		Ringo's Gift- NM 13a	0.8	14		Lovelace- NM 6f	5.04	10.69		Durban Poison CBD- NM 11b	10.04	9.93		Durban Poison- NM 11b	15.14	0
Ringo's Gift- NM 13b	0.8	14		Ringo's Gift- NM 13b	0.8	14		Lovelace- NM 6d	5.04	10.69		Durban Poison CBD- NM 11a	10.04	9.93		Ayahuasca Purple- NM 14a	15.15	No info
Charlotte's Web- NM13b	1	17		Charlotte's Web- NM13b	1	17		Cannatonic- NM 13b	6	14		Lovelace- NM 6i	10.16	3.53		Durban Poison- NM 11a	15.18	0
Harle-Tsu- NM 13b	1	11		Harle-Tsu- NM 13b	1	11		Cannatonic- NM 13a	6	14		Eclipse (Hybrid Preroll)- NM 16	10.29	No info		Blue Dream- NM 11a	15.18	0
Charlotte's Web- NM 13a	1	17		Charlotte's Web- NM 13a	1	17		Cannatonic- NM 11a	6.5	11.79		Purple Reign- NM 5a	11	No info		Power Nap- NM 14a	15.22	No info
Harle-Tsu- NM 13a	1	11		Harle-Tsu- NM 13a	1	11		CBD Metihaze- NM 14	6.51	13.85		Hello Mota- NM 5c	11	No info		8 Ball Kush- NM 14c	15.24	No info
Larry OG- NM 11b	3.18	No info		Larry OG- NM 11b	3.18	No info		CBD Blue Shark- NM 14	6.55	13.12		Purple Kush- NM 5b	11	No info		Shiskaberry- NM 8e	15.37	No info
Lovelace- NM 6c	3.53	10.16		Lovelace- NM 6c	3.53	10.16		Healing Haze- NM 7a	7	19		Nordle- NM 8e	11.09	8.14		White Bubba Kush- NM 10	15.4	0.03
Cannatonic- NM 10	4.1	11.4		Cannatonic- NM 10	4.1	11.4		Healing Haze- NM 7b	7	19		Mercury Kush- NM 10	11.8	0		Larry OG- NM 10	15.4	0.03
Shark Shock- NM 3a	4.12	8.21		Shark Shock- NM 3a	4.12	8.21		Pennywise- NM 5b	8	9		WOW- NM 8b	12	12		Critical Mass- NM 6b	15.45	No info
Shark Shock- NM 3d	4.12	8.21		Shark Shock- NM 3d	4.12	8.21		Nordle- NM 8b	8	11		Bronx Glue- NM 5b	12	No info		Critical Mass- NM 6i	15.45	No info
Shark Shock- NM 3b	4.12	8.21		Shark Shock- NM 3b	4.12	8.21		Nordle- NM 8d	8	11		OG 18- NM 5b	12	No info		Head Cheese- NM 15	15.5	No info
Shark Shock- NM 3c	4.12	8.21		Shark Shock- NM 3c	4.12	8.21		Nordle- NM 8c	8	11		AK-47- NM 8e	12.1	9		Sour Diesel- NM 14a	15.51	No info
Lovelace- NM 6b	4.19	10.86		Lovelace- NM 6b	4.19	10.86		AK-47- NM 8b	8	12		Overflookies- NM 4a	12.39	No info		Kosher Kush- NM 15	15.6	No info
Lovelace- NM 6h	4.19	10.86		Lovelace- NM 6h	4.19	10.86		WOW- NM 8c	8	14		LA Conf. x Cookies- NM 4b	12.55	No info		Durban Poison - NM 10	15.7	0.03
Lovelace- NM 6g	4.35	11.93		Lovelace- NM 6g	4.35	11.93		Wow- NM 8d	8	15		Wow- NM 8a	12.69	12.53		King Louie x Copper Chem- NM 5b	16	No info
Lovelace- NM 6e	4.35	11.93		Lovelace- NM 6e	4.35	11.93		Keele's K.O.- NM 3a	8.13	4.91		Super Lemon Haze - NM 10	12.7	0		Strawberry Fields- NM 5b	16	No info
Lovelace- NM 6a	4.4	13.19		Lovelace- NM 6a	4.4	13.19		Keele's K.O.- NM 3b	8.13	4.91		Purple Kush- NM 10	13	0		Tahoe Alien- NM 5b	16	No info
Lovelace- NM 6a	4.4	13.19		Lovelace- NM 6a	4.4	13.19		Keele's K.O.- NM 3d	8.13	4.91		Grapefruit x Blueberry- NM 4a	13.18	No info		Super Lemon Haze- NM 8b	16	No info
Thunderstruck- NM 6d	4.62	7.48		Thunderstruck- NM 6d	4.62	7.48		Nordle- NM 8a	8.14	11.09		White Walker Kush- NM 11b	13.44	0		King Louie x Copper Chem- NM 5b	16	No info
Ecto Cooler- NM 16	4.97	13.89		Ecto Cooler- NM 16	4.97	13.89		Ak-47- NM 8a	8.38	15.73		Buffalo OG- NM 6e	13.53	No info		Tahoe Alien- NM 5b	16	No info
Lovelace- NM 6f	5.04	10.69						CBD- Z-7- NM 9	8.56	18.55		Buffalo OG- NM 6f	13.53	No info		Lucky Charms- NM 5b	16	No info
Lovelace- NM 6d	5.04	10.69						Pennywise- NM 5a	9	9		Red Dragon- NM 14c	13.64	No info		Cheshire x Purple Gelato- NM 5b	16	No info
Cannatonic- NM 13b	6	14						AK-47- NM 8d	9	12		Larry OG- NM 4a	13.8	No info		Pineapple Headband- NM 5b	16	No info
Cannatonic- NM 13a	6	14						AK-47- NM 8c	10	12		Cookies n Chem- NM 4a	13.89	No info		THC Bomb- NM 5b	16	No info
Cannatonic- NM 11a	6.5	11.79										Strawberry Cough- NM 14a	13.92	No info		Lucky Charms- NM 5c	16	No info
CBD Metihaze- NM 14	6.51	13.85										Strawberry Cough- NM 14b	13.92	No info		Pineapple Headband- NM 5c	16	No info
CBD Blue Shark- NM 14	6.55	13.12										Strawberry Cough- NM 14d	13.92	No info		Shishkaberry- NM 6a	16.14	No info
Healing Haze- NM 7a	7	19										Tangie Haze- NM 5a	14	No info		Shiskaberry- NM 6b	16.14	No info
Healing Haze- NM 7b	7	19										Bubba Kush- NM 10	14	0		Shiskaberry- NM 6g	16.14	No info
Pennywise- NM 5b	8	9										Shipwreck- NM 5b	14	No info		Shiskaberry- NM 6h	16.14	No info
Nordle- NM 8b	8	11										Wookies- NM 5b	14	No info		Wookies- NM 4b	16.16	No info
Nordle- NM 8d	8	11										Shipwreck- NM 5c	14	No info		Shishkaberry-NM 6c	16.2	No info
Nordle- NM 8c	8	11										Wookies- NM 5c	14	No info		Zombie Rasta- NM 14a	16.2	No info
AK-47- NM 8b	8	12										Guard Dawg- NM 5c	14	No info		Cheese- NM 4b	16.2	No info
WOW- NM 8c	8	14										Dreamweaver- NM 6a	14.15	No info		Zombie Rasta- NM 14b	16.2	No info
Wow- NM 8d	8	15										Dreamweaver- NM 6b	14.15	No info		Zombie Rasta- NM 14c	16.2	No info
Keele's K.O.- NM 3a	8.13	4.91										Kush Berry- NM 11a	14.29	0		Platinum Buffalo- NM 6i	16.24	No info
Keele's K.O.- NM 3b	8.13	4.91										Dosi Pie- NM 6a	14.35	No info		Sour Blueberry- NM 14b	16.29	No info
Keele's K.O.- NM 3d	8.13	4.91										Kush Berry- NM 11b	14.39	0		Sour Blueberry- NM 14d	16.29	No info
Nordle- NM 8a	8.14	11.09										Jack the Ripper- NM 16	14.66	0.01		Tangie- NM 12a	16.36	0
Ak-47- NM 8a	8.38	15.73										Platinum Scout- NM 6a	14.85	No info		Majin Buu- NM 14c	16.37	No info
CBD- Z-7- NM 9	8.56	18.55										Platinum Scout NM 6b	14.85	No info		Majin Buu- NM 14d	16.37	No info
Pennywise- NM 5a	9	9										Platinum Scout- NM 6f	14.85	No info		White Walker Kush- NM 11a	16.38	0
AK-47- NM 8d	9	12										Platinum Scout- NM 6g	14.85	No info		Orangegasm- NM 2	16.4	0
AK-47- NM 8c	10	12										Buffalo OG- NM 6b	14.86	0.06		Cocoa OG- NM 14a	16.41	No info
Durban Poison CBD- NM 11b	10.04	9.93										Dreamweaver- NM 6d	14.87	0.29		Electric Punch- NM 6d	16.41	0.54
Durban Poison CBD- NM 11a	10.04	9.93										Dreamweaver- NM 6f	14.87	0.29		Cocoa OG- NM 14d	16.41	No info
Lovelace- NM 6i	10.16	3.53										Dreamweaver- NM 6g	14.87	0.29		Platinum Angel- NM 6a	16.43	No info
Eclipse (Hybrid Preroll)- NM 16	10.29	No info										Platinum Scout- NM 6d	14.89	No info		Platinum Angel- NM 6b	16.43	No info
Purple Reign- NM 5a	11	No info										Platinum Scout- NM 6h	14.89	No info		Platinum Angel- NM 6e	16.43	No info
Hello Mota- NM 5c	11	No info										Wow- NM 8e	14.95	8.04		Platinum Angel- NM 6g	16.43	No info
Purple Kush- NM 5b	11	No info										Overflookies- NM 5a	15	No info		Platinum Angel- NM 6h	16.43	No info
Nordle- NM 8e	11.09	8.14										Sour Kosher- NM 8b	15	No info		Platinum Angel- NM 6i	16.43	No info
Mercury Kush- NM 10	11.8	0										Shiskaberry- NM 8b	15	No info		Purple Kush- NM 4a	16.45	No info
WOW- NM 8b	12	12										Shiskaberry- NM 8c	15	No info		Platinum Angel	16.48	No info
Bronx Glue- NM 5b	12	No info										Sour Kosher- NM 8d	15	No info		Platinum Angel- NM 6f	16.48	No info
OG 18- NM 5b	12	No info										Jack's Cleaner - NM 10	15	0.03		Sour Punch- NM 6h	16.48	0.06
AK-47- NM 8e	12.1	9														Girl Scout Cookies- NM 12a	16.5	0
Overflookies- NM 4a	12.39	No info														Girl Scout Cookies- NM 12b	16.5	No info
LA Conf. x Cookies- NM 4b	12.55	No info														Blue Dream- NM 11b	16.5	0
Wow- NM 8a	12.69	12.53														La Cannalope- NM 14c	16.51	No info
Super Lemon Haze - NM 10	12.7	0														White Velvet- NM 6d	16.55	No info
Purple Kush- NM 10	13	0														White Velvet- NM 6f	16.55	No info
Grapefruit x Blueberry- NM 4a	13.18	No info														Epic Ray's Purple- NM 9	16.58	No info
White Walker Kush- NM 11b	13.44	0														Twisted Velvet- NM 6g	16.64	No info
Buffalo OG- NM 6e	13.53	No info														Twist Velvet- NM 6a	16.69	0.81
Buffalo OG- NM 6f	13.53	No info														Twisted Velvet- NM 6d	16.69	0.81
Red Dragon- NM 14c	13.64	No info														Twisted Velvet- NM 6e	16.69	0.81
Larry OG- NM 4a	13.8	No info														Twisted Velvet- NM 6f	16.69	0.81
Cookies n Chem- NM 4a	13.89	No info														Twisted Velvet- NM 6i	16.69	0.81
Strawberry Cough- NM 14a	13.92	No info														Super Lemon Haze- NM 8a	16.84	No info
Strawberry Cough- NM 14b	13.92	No info														Platinum Scout-NM 6c	16.86	No info
Strawberry Cough- NM 14d	13.92	No info														Platinum Scout- NM 6e	16.86	No info
Tangie Haze- NM 5a	14	No info														Tangie- NM 16	16.88	0.01
Bubba Kush- NM 10	14	0														Grizzly Kush- NM 15	16.92	No info
Shipwreck- NM 5b	14	No info														Purple Kush x Coper Chem- NM 4a	16.93	No info
Wookies- NM 5b	14	No info														Alien Jacked Up- NM 14b	16.95	No info
Shipwreck- NM 5c	14	No info														Platinum Scout- NM 6i	16.95	No info
Wookies- NM 5c	14	No info														Blueberry Hasplant- NM 7a	17	No info
Guard Dawg- NM 5c	14	No info														Blueberry Hashplant- NM 7b	17	No info
Dreamweaver- NM 6a	14.15	No info														Holy Grail -NM 8c	17	No info
Dreamweaver- NM 6b	14.15	No info														Shiskaberry- NM 8d	17	No info
Kush Berry- NM 11a	14.29	0														Purple Reign- NM 5b	17	No info
Dosi Pie- NM 6a	14.35	No info														Blueberry x Headband- NM 5b	17	No info
Kush Berry- NM 11b	14.39	0														Grape Gorilla Gush x Star Dawg- NM 5b	17	No info
Jack the Ripper- NM 16	14.66	0.01														Overflookies- NM 5b	17	No info
Platinum Scout- NM 6a	14.85	No info														Master Kush- NM 5c	17	No info
Platinum Scout NM 6b	14.85	No info														Blueberry x Headband- NM 5c	17	No info
Platinum Scout- NM 6f	14.85	No info														Ice Kush- NM 15	17.02	No info
Platinum Scout- NM 6g	14.85	No info														Lemon Sour Diesel- NM 8a	17.05	No info
Buffalo OG- NM 6b	14.86	0.06														Tropic Heat- NM 6e	17.07	No info
Dreamweaver- NM 6d	14.87	0.29														Shiskaberry- NM 8a	17.12	No info
Dreamweaver- NM 6f	14.87	0.29														Sour Kosher- NM 8e	17.18	No info
Dreamweaver- NM 6g	14.87	0.29														Irene x Alien Dawg- NM 12b	17.23	No info
Platinum Scout- NM 6d	14.89	No info														Lavendar Jones- NM 6i	17.28	No info
Platinum Scout- NM 6h	14.89	No info														Rio Grande Haze- NM 9	17.32	No info
Wow- NM 8e	14.95	8.04														Burqueno Berry- NM 6b	17.33	No info
Overflookies- NM 5a	15	No info														Burqueno Berry-NM 6c	17.33	No info
Sour Kosher- NM 8b	15	No info														Sour Punch- NM 6a	17.39	No info
Shiskaberry- NM 8b	15	No info														Sour Punch- NM 6b	17.39	No info
Shiskaberry- NM 8c	15	No info														Sour Punch-NM 6c	17.39	No info
Sour Kosher- NM 8d	15	No info														Sour Punch- NM 6d	17.39	No info
Jack's Cleaner - NM 10	15	0.03														Sour Punch- NM 6f	17.39	No info
Durban Poison- NM 11b	15.14	0														Cancers Nightmare- NM 14d	17.41	No info
Ayahuasca Purple- NM 14a	15.15	No info														Girl Scout Cookies- NM 6a	17.45	No info
Durban Poison- NM 11a	15.18	0														Dreamweaver-NM 6c	17.48	No info
Blue Dream- NM 11a	15.18	0														Platinum Punch- NM 6d	17.87	No info
Power Nap- NM 14a	15.22	No info														Platinum Punch- NM 6g	17.87	No info
8 Ball Kush- NM 14c	15.24	No info														Platinum Punch- NM 6h	17.87	No info
Shiskaberry- NM 8e	15.37	No info														Platinum Punch- NM 6i	17.87	No info
White Bubba Kush- NM 10	15.4	0.03														Tropic Heat- NM 6g	17.89	No info
Larry OG- NM 10	15.4	0.03														Tropic Heat- NM 6h	17.89	No info
Critical Mass- NM 6b	15.45	No info														Laughing Buddha- NM 3a	17.9	No info
Critical Mass- NM 6i	15.45	No info														Blue Dream- NM 10	17.9	0.03
Head Cheese- NM 15	15.5	No info														Laughing Buddha- NM 3d	17.9	No info
Sour Diesel- NM 14a	15.51	No info														Laughing Buddha- NM 3b	17.9	No info
Kosher Kush- NM 15	15.6	No info														Laughing Buddha- NM 3c	17.9	No info
Durban Poison - NM 10	15.7	0.03														Green Ghost - NM 12b	17.95	No info
King Louie x Copper Chem- NM 5b	16	No info														Girl Scout Cookies- NM 6d	17.97	0.6
Strawberry Fields- NM 5b	16	No info														Alien Truth Indica- NM 1	18	No info
Tahoe Alien- NM 5b	16	No info														Blueberry Sour Outdoor- NM 4a	18	No info
Super Lemon Haze- NM 8b	16	No info														King Louie x Copper Chem- NM 5a	18	No info
King Louie x Copper Chem- NM 5b	16	No info														Bruce Banner- NM 5a	18	No info
Tahoe Alien- NM 5b	16	No info														Amnesia- NM 8b	18	No info
Lucky Charms- NM 5b	16	No info														LemonSour Diesel- NM 8b	18	No info
Cheshire x Purple Gelato- NM 5b	16	No info														Amnesia -NM 8c	18	No info
Pineapple Headband- NM 5b	16	No info														Super Lemon Haze -NM 8c	18	No info
THC Bomb- NM 5b	16	No info														Lemon Sour Diesel -NM 8c	18	No info
Lucky Charms- NM 5c	16	No info														Amnesia- NM 8d	18	No info
Pineapple Headband- NM 5c	16	No info														Lemon Sour Diesel- NM 8d	18	No info
Shishkaberry- NM 6a	16.14	No info														Skunk #1- NM 13a	18	0.01
Shiskaberry- NM 6b	16.14	No info														Cheeisenberg- NM 13a	18	0.01
Shiskaberry- NM 6g	16.14	No info														Skunk #1- NM 13b	18	0.01
Shiskaberry- NM 6h	16.14	No info														Cheeisenberg- NM 13b	18	0.01
Wookies- NM 4b	16.16	No info														Candyland- NM 5b	18	No info
Shishkaberry-NM 6c	16.2	No info														Bruce Banner's Ghost- NM 5b	18	No info
Zombie Rasta- NM 14a	16.2	No info														So Cal Al- NM 16	18.04	0.01
Cheese- NM 4b	16.2	No info														Platinum Gorilla- NM 6a	18.05	No info
Zombie Rasta- NM 14b	16.2	No info														Platinum Gorilla- NM 6f	18.05	No info
Zombie Rasta- NM 14c	16.2	No info														Electric Punch- NM 6g	18.05	0.52
Platinum Buffalo- NM 6i	16.24	No info														Platinum Gorilla- NM 6g	18.05	No info
Sour Blueberry- NM 14b	16.29	No info														Electric Punch- NM 6h	18.05	0.52
Sour Blueberry- NM 14d	16.29	No info														Platinum Gorilla- NM 6i	18.05	No info
Tangie- NM 12a	16.36	0														Truth Band- NM 14b	18.06	No info
Majin Buu- NM 14c	16.37	No info														Truth Band- NM 14d	18.06	No info
Majin Buu- NM 14d	16.37	No info														Platinum Punch- NM 6a	18.08	No info
White Walker Kush- NM 11a	16.38	0														Electric Punch-NM 6c	18.08	No info
Orangegasm- NM 2	16.4	0														Platinum Punch-NM 6c	18.08	No info
Cocoa OG- NM 14a	16.41	No info														Electric Punch- NM 6e	18.08	No info
Electric Punch- NM 6d	16.41	0.54														Platinum Punch- NM 6e	18.08	No info
Cocoa OG- NM 14d	16.41	No info														Electric Punch- NM 6f	18.08	No info
Platinum Angel- NM 6a	16.43	No info														Platinum Punch- NM 6f	18.08	No info
Platinum Angel- NM 6b	16.43	No info														Lavender Jones- NM 6a	18.1	No info
Platinum Angel- NM 6e	16.43	No info														Lavender Jones- NM 6b	18.1	No info
Platinum Angel- NM 6g	16.43	No info														Lavender Jones-NM 6c	18.1	No info
Platinum Angel- NM 6h	16.43	No info														Lavendar Jones- NM 6e	18.1	No info
Platinum Angel- NM 6i	16.43	No info														Lavendar Jones- NM 6f	18.1	No info
Purple Kush- NM 4a	16.45	No info														Lavendar Jones- NM 6h	18.1	No info
Platinum Angel	16.48	No info														Critical Mass- NM 15	18.14	No info
Platinum Angel- NM 6f	16.48	No info														Holy Grail Kush- NM 8e	18.18	No info
Sour Punch- NM 6h	16.48	0.06														Blue Dream- NM 15	18.21	No info
Girl Scout Cookies- NM 12a	16.5	0														Lemon Sour Diesel- NM 8e	18.25	No info
Girl Scout Cookies- NM 12b	16.5	No info														McGrupp- NM 7a	18.3	No info
Blue Dream- NM 11b	16.5	0														McGrupp- NM 7b	18.3	No info
La Cannalope- NM 14c	16.51	No info														Amnesia- NM 8a	18.53	No info
White Velvet- NM 6d	16.55	No info														Star Killer- NM 3a	18.57	No info
White Velvet- NM 6f	16.55	No info														Star Killer- NM 3d	18.57	No info
Epic Ray's Purple- NM 9	16.58	No info														Star Killer- NM 3b	18.57	No info
Twisted Velvet- NM 6g	16.64	No info														Girl Scout Cookies- NM 6i	18.57	No info
Twist Velvet- NM 6a	16.69	0.81														Star Killer- NM 3c	18.57	No info
Twisted Velvet- NM 6d	16.69	0.81														Blackberry Kush- NM 16	18.58	0.01
Twisted Velvet- NM 6e	16.69	0.81														Sour Kosher- NM 8a	18.61	No info
Twisted Velvet- NM 6f	16.69	0.81														Northern Lights Extreme- NM 15a	18.8	0.07
Twisted Velvet- NM 6i	16.69	0.81														Go Time- NM 16	18.83	0.01
Super Lemon Haze- NM 8a	16.84	No info														Cherry Diesel- NM 9	18.85	No info
Platinum Scout-NM 6c	16.86	No info														Amnesia- NM 8e	18.85	No info
Platinum Scout- NM 6e	16.86	No info														Mazar- NM 14a	18.89	No info
Tangie- NM 16	16.88	0.01														Mazar- NM 14c	18.89	No info
Grizzly Kush- NM 15	16.92	No info														Sour Pez- NM 9	18.9	No info
Purple Kush x Coper Chem- NM 4a	16.93	No info														Blackberry Raspberry- NM 14b	18.91	No info
Alien Jacked Up- NM 14b	16.95	No info														Super Lemon Haze- NM 4b	18.96	No info
Platinum Scout- NM 6i	16.95	No info														Bubba OG- NM 16	18.98	0.01
Blueberry Hasplant- NM 7a	17	No info														Ken OG Indica- NM 1	19	No info
Blueberry Hashplant- NM 7b	17	No info														Rick Motivation- NM 1	19	No info
Holy Grail -NM 8c	17	No info														Diamond Princess- NM 5a	19	No info
Shiskaberry- NM 8d	17	No info														Confidential Cookies- NM 5a	19	No info
Purple Reign- NM 5b	17	No info														Vanilla Kush- NM 8b	19	No info
Blueberry x Headband- NM 5b	17	No info														Purple Kush - NM 8d	19	No info
Grape Gorilla Gush x Star Dawg- NM 5b	17	No info														Cali Dragon (pre roll)- NM 12a	19	No info
Overflookies- NM 5b	17	No info														Girl Scout Cookie- NM 13a	19	0.06
Master Kush- NM 5c	17	No info														Green Crack- NM 13a	19	0.07
Blueberry x Headband- NM 5c	17	No info														Doom-Tree- NM 15	19	No info
Ice Kush- NM 15	17.02	No info														Girl Scout Cookie- NM 13b	19	0.06
Lemon Sour Diesel- NM 8a	17.05	No info														Green Crack- NM 13b	19	0.07
Tropic Heat- NM 6e	17.07	No info														Jack the Ripper- NM 5b	19	No info
Shiskaberry- NM 8a	17.12	No info														Sage n Sour- NM 5b	19	No info
Sour Kosher- NM 8e	17.18	No info														Confidential Cookies- NM 5b	19	No info
Irene x Alien Dawg- NM 12b	17.23	No info														Guard Dawg- NM 5b	19	No info
Lavendar Jones- NM 6i	17.28	No info														Tangie Haze- NM 5b	19	No info
Rio Grande Haze- NM 9	17.32	No info														Jack the Ripper- NM 5c	19	No info
Burqueno Berry- NM 6b	17.33	No info														Sage n Sour- NM 5c	19	No info
Burqueno Berry-NM 6c	17.33	No info														Rainmaker (Sativa preroll)- NM 12b	19.02	No info
Sour Punch- NM 6a	17.39	No info														Black Berrium- NM 6e	19.04	No info
Sour Punch- NM 6b	17.39	No info														Sour Diesel- NM 9	19.08	No info
Sour Punch-NM 6c	17.39	No info														Golden Cobra- NM 3a	19.1	No info
Sour Punch- NM 6d	17.39	No info														Golden Cobra- NM 3d	19.1	No info
Sour Punch- NM 6f	17.39	No info														Golden Cobra- NM 3b	19.1	No info
Cancers Nightmare- NM 14d	17.41	No info														Gorilla Dosha- NM 6e	19.17	0.08
Girl Scout Cookies- NM 6a	17.45	No info														Gorilla Dosha- NM 6g	19.17	0.08
Dreamweaver-NM 6c	17.48	No info														Gorilla Dosha- NM 6h	19.17	0.08
Platinum Punch- NM 6d	17.87	No info														Gorilla Dosha- NM 6i	19.17	0.08
Platinum Punch- NM 6g	17.87	No info														Afghan Kush- NM 2	19.2	0
Platinum Punch- NM 6h	17.87	No info														Jack Skellington- NM 3a	19.2	No info
Platinum Punch- NM 6i	17.87	No info														Rollex OG x Dark Shadow Haze- NM 3a	19.2	No info
Tropic Heat- NM 6g	17.89	No info														Jack Skellington- NM 3d	19.2	No info
Tropic Heat- NM 6h	17.89	No info														Rolex OG x Dark Shadow Haze- NM 3d	19.2	No info
Laughing Buddha- NM 3a	17.9	No info														Rollex OG x Dark Shadow Haze- NM 3b	19.2	No info
Blue Dream- NM 10	17.9	0.03														Rollex OG x Dark Shadow Haze- NM 3c	19.2	No info
Laughing Buddha- NM 3d	17.9	No info														Strange Brew- NM 14	19.31	0.04
Laughing Buddha- NM 3b	17.9	No info														CBD GOG- NM 14	19.31	0.02
Laughing Buddha- NM 3c	17.9	No info														Purple Kush- NM 9	19.56	No info
Green Ghost - NM 12b	17.95	No info														Irene x Alien Dawg- NM 6h	19.58	No info
Girl Scout Cookies- NM 6d	17.97	0.6														Gorilla Glue (pre roll)- NM 12a	19.6	No info
Alien Truth Indica- NM 1	18	No info														Mr. Nice Guy- NM 4b	19.64	No info
Blueberry Sour Outdoor- NM 4a	18	No info														Power Nap- NM 6b	19.65	No info
King Louie x Copper Chem- NM 5a	18	No info														Lavendar Jones- NM 6d	19.72	No info
Bruce Banner- NM 5a	18	No info														Lavendar Jones- NM 6g	19.72	No info
Amnesia- NM 8b	18	No info														Green Ghost - NM 12a	19.77	0
LemonSour Diesel- NM 8b	18	No info														Bruce Banner- NM 4b	19.77	No info
Amnesia -NM 8c	18	No info														Cali Dragon - NM 12a	19.82	0
Super Lemon Haze -NM 8c	18	No info														Cali Dragon- NM 12b	19.82	No info
Lemon Sour Diesel -NM 8c	18	No info														9LB Hammer- NM 14	19.89	0.07
Amnesia- NM 8d	18	No info														Strawberry Cough- NM 8a	19.92	No info
Lemon Sour Diesel- NM 8d	18	No info														Strawberry Cough- NM 8e	19.92	No info
Skunk #1- NM 13a	18	0.01														Sour Punch- NM 6g	19.99	No info
Cheeisenberg- NM 13a	18	0.01														Cookies and Cream- NM 2	20	0
Skunk #1- NM 13b	18	0.01														Bronx Glue- NM 5a	20	No info
Cheeisenberg- NM 13b	18	0.01														Cookies n Chem- NM 5a	20	No info
Candyland- NM 5b	18	No info														Citrus Sap- NM 7a	20	No info
Bruce Banner's Ghost- NM 5b	18	No info														Citrus Sap- NM 7b	20	No info
So Cal Al- NM 16	18.04	0.01														Jack Herer- NM 8b	20	No info
Platinum Gorilla- NM 6a	18.05	No info														Holy Grail - NM 8b	20	No info
Platinum Gorilla- NM 6f	18.05	No info														Jack Herer -NM 8c	20	No info
Electric Punch- NM 6g	18.05	0.52														Ghost Train Haze- NM 8d	20	No info
Platinum Gorilla- NM 6g	18.05	No info														Longbottom Leaf- NM 13a	20	0.01
Electric Punch- NM 6h	18.05	0.52														Bruce Banner's Ghost- NM 13a	20	0.06
Platinum Gorilla- NM 6i	18.05	No info														Tangerine Kush- NM 13a	20	0.01
Truth Band- NM 14b	18.06	No info														Rare Darkness- NM 13a	20	0.01
Truth Band- NM 14d	18.06	No info														Boy Scout Cookie- NM 13a	20	0.01
Platinum Punch- NM 6a	18.08	No info														Longbottom Leaf- NM 13b	20	0.01
Electric Punch-NM 6c	18.08	No info														Bruce Banner's Ghost- NM 13b	20	0.06
Platinum Punch-NM 6c	18.08	No info														Tangerine Kush- NM 13b	20	0.01
Electric Punch- NM 6e	18.08	No info														Rare Darkness- NM 13b	20	0.01
Platinum Punch- NM 6e	18.08	No info														Boy Scout Cookie- NM 13b	20	0.01
Electric Punch- NM 6f	18.08	No info														Blue Dream- NM 5b	20	No info
Platinum Punch- NM 6f	18.08	No info														Flo- NM 5b	20	No info
Lavender Jones- NM 6a	18.1	No info														Cookies n chem- NM 5b	20	No info
Lavender Jones- NM 6b	18.1	No info														Do-Si-Dos- NM 5b	20	No info
Lavender Jones-NM 6c	18.1	No info														Mr. Nice Guy- NM 5b	20	No info
Lavendar Jones- NM 6e	18.1	No info														Cookies n Chem- NM 5c	20	No info
Lavendar Jones- NM 6f	18.1	No info														OGKB- NM 6h	20.21	No info
Lavendar Jones- NM 6h	18.1	No info														Jack Herer- NM 8e	20.25	No info
Critical Mass- NM 15	18.14	No info														Agent Orange- NM 14	20.25	0.39
Holy Grail Kush- NM 8e	18.18	No info														Vanilla Kush- NM 8a	20.3	No info
Blue Dream- NM 15	18.21	No info														Desert Diesel- NM 14a	20.3	No info
Lemon Sour Diesel- NM 8e	18.25	No info														Blueberry Gum- NM 15	20.31	No info
McGrupp- NM 7a	18.3	No info														White Lavendar- NM 14	20.31	0.22
McGrupp- NM 7b	18.3	No info														Bio-Chem- NM 16	20.32	0.01
Amnesia- NM 8a	18.53	No info														Cherry Pie- NM 16	20.38	0.01
Star Killer- NM 3a	18.57	No info														Sour Banana Sherbert- NM 14	20.39	0.02
Star Killer- NM 3d	18.57	No info														G13- NM 15	20.4	No info
Star Killer- NM 3b	18.57	No info														Jack Herer- NM 8a	20.42	No info
Girl Scout Cookies- NM 6i	18.57	No info														Ace High- NM 2	20.5	0
Star Killer- NM 3c	18.57	No info														Jelly Breath- NM 6a	20.53	No info
Blackberry Kush- NM 16	18.58	0.01														Jelly Breath- NM 6b	20.53	No info
Sour Kosher- NM 8a	18.61	No info														Jelly Breath- NM 6e	20.53	No info
Northern Lights Extreme- NM 15a	18.8	0.07														Jelly Breath- NM 6g	20.53	No info
Go Time- NM 16	18.83	0.01														Platinum Gorilla- NM 6e	20.54	No info
Cherry Diesel- NM 9	18.85	No info														Platinum Gorilla- NM 6h	20.54	No info
Amnesia- NM 8e	18.85	No info														Chocolate Heaven- NM 14c	20.55	No info
Mazar- NM 14a	18.89	No info														Lavendar- NM 11a	20.57	0
Mazar- NM 14c	18.89	No info														Lavendar- NM 11b	20.57	0
Sour Pez- NM 9	18.9	No info														Sunset Sherbet- NM 16	20.58	0.01
Blackberry Raspberry- NM 14b	18.91	No info														Blue Dream- NM 15b	20.58	0.09
Super Lemon Haze- NM 4b	18.96	No info														Blue Dream- NM 15a	20.58	0.09
Bubba OG- NM 16	18.98	0.01														QRAZY TRAIN- NM 14	20.59	0.51
Ken OG Indica- NM 1	19	No info														Jilly Bean- NM 14	20.65	0.36
Rick Motivation- NM 1	19	No info														Mimosa- NM 12a	20.67	0
Diamond Princess- NM 5a	19	No info														Mimosa - NM 12b	20.67	No info
Confidential Cookies- NM 5a	19	No info														Lemon Thai Kush- NM 14	20.69	0.21
Vanilla Kush- NM 8b	19	No info														Mandarin Cookies- NM 12a	20.7	0
Purple Kush - NM 8d	19	No info														Mandarin Cookies- NM 12b	20.7	No info
Cali Dragon (pre roll)- NM 12a	19	No info														Raspberry Diesel- NM 14	20.73	0.05
Girl Scout Cookie- NM 13a	19	0.06														Mr. Nice- NM 14	20.75	0.19
Green Crack- NM 13a	19	0.07														Elephant Stomper x Star Dawg (indica preroll)- NM 12b	20.76	No info
Doom-Tree- NM 15	19	No info														Black D.O.G.- NM 14	20.78	0.06
Girl Scout Cookie- NM 13b	19	0.06														Elmer's Glue- NM 6a	20.83	No info
Green Crack- NM 13b	19	0.07														Elmer's Glue- NM 6b	20.83	No info
Jack the Ripper- NM 5b	19	No info														Elmer's Glue-NM 6c	20.83	No info
Sage n Sour- NM 5b	19	No info														Elmer's Glue- NM 12a	20.83	0
Confidential Cookies- NM 5b	19	No info														Elmer's Glue (pre roll)- NM 12a	20.83	No info
Guard Dawg- NM 5b	19	No info														Elmers Glue (Indica preroll)- NM 12b	20.83	No info
Tangie Haze- NM 5b	19	No info														Darkstar- NM 16	20.83	0.01
Jack the Ripper- NM 5c	19	No info														Nightmare Cookies- NM 3a	20.85	No info
Sage n Sour- NM 5c	19	No info														Jedi Kush- NM 3a	20.85	No info
Rainmaker (Sativa preroll)- NM 12b	19.02	No info														Nightmare Cookies- NM 3d	20.85	No info
Black Berrium- NM 6e	19.04	No info														Jedi Kush- NM 3d	20.85	No info
Sour Diesel- NM 9	19.08	No info														Nightmare Cookies- NM 3b	20.85	No info
Golden Cobra- NM 3a	19.1	No info														Jedi Kush- NM 3b	20.85	No info
Golden Cobra- NM 3d	19.1	No info														Nightmare Cookies- NM 3c	20.85	No info
Golden Cobra- NM 3b	19.1	No info														Ghost Town (Indica preroll)- NM 12b	20.88	No info
Gorilla Dosha- NM 6e	19.17	0.08														Cherry O's- NM 2	20.9	0
Gorilla Dosha- NM 6g	19.17	0.08														Pineapple Express- NM 3a	20.9	0.01
Gorilla Dosha- NM 6h	19.17	0.08														Pineapple Express- NM 3d	20.9	0.01
Gorilla Dosha- NM 6i	19.17	0.08														Blueberry x Headband- NM 9	20.93	No info
Afghan Kush- NM 2	19.2	0														Durango OG- NM 9	20.94	No info
Jack Skellington- NM 3a	19.2	No info														Gypsy Widow- NM 14b	20.97	No info
Rollex OG x Dark Shadow Haze- NM 3a	19.2	No info														Hello Mota- NM 5a	21	No info
Jack Skellington- NM 3d	19.2	No info														Cali Dragon - NM 7a	21	No info
Rolex OG x Dark Shadow Haze- NM 3d	19.2	No info														Cali Dragon - NM 7b	21	No info
Rollex OG x Dark Shadow Haze- NM 3b	19.2	No info														Ghost Train Haze- NM 8b	21	No info
Rollex OG x Dark Shadow Haze- NM 3c	19.2	No info														French Bread- NM 8b	21	No info
Strange Brew- NM 14	19.31	0.04														Holy Grail Kush- NM 8d	21	No info
CBD GOG- NM 14	19.31	0.02														Colorado Clementines- NM 9	21	No info
Purple Kush- NM 9	19.56	No info														Gorilla Glue- NM 13a	21	0.05
Irene x Alien Dawg- NM 6h	19.58	No info														Rare Dream- NM 13a	21	0.06
Gorilla Glue (pre roll)- NM 12a	19.6	No info														Blue Dream- NM 13a	21	0.01
Mr. Nice Guy- NM 4b	19.64	No info														Gorilla Glue- NM 13b	21	0.05
Power Nap- NM 6b	19.65	No info														Rare Dream- NM 13b	21	0.06
Lavendar Jones- NM 6d	19.72	No info														Blue Dream- NM 13b	21	0.01
Lavendar Jones- NM 6g	19.72	No info														Gorilla Glue #4- NM 5b	21	No info
Green Ghost - NM 12a	19.77	0														Lucinda- NM 5b	21	No info
Bruce Banner- NM 4b	19.77	No info														Rebel Cookies- NM 3a	21.01	No info
Cali Dragon - NM 12a	19.82	0														Rebel Cookies- NM 3d	21.01	No info
Cali Dragon- NM 12b	19.82	No info														Rebel Cookies- NM 3c	21.01	No info
9LB Hammer- NM 14	19.89	0.07														Neville's Haze- NM 14c	21.1	No info
Strawberry Cough- NM 8a	19.92	No info														Super Lemon Haze- NM 8e	21.13	No info
Strawberry Cough- NM 8e	19.92	No info														Alien Rift- NM 3c	21.25	No info
Sour Punch- NM 6g	19.99	No info														Lost Coast OG- NM 2	21.3	0
Cookies and Cream- NM 2	20	0														Rosetta Stone- NM 3a	21.3	No info
Bronx Glue- NM 5a	20	No info														Rosetta Stone- NM 3d	21.3	No info
Cookies n Chem- NM 5a	20	No info														Jelly Breath- NM 6h	21.3	0.07
Citrus Sap- NM 7a	20	No info														Jelly Breath- NM 6i	21.3	0.07
Citrus Sap- NM 7b	20	No info														Rosetta Stone- NM 3c	21.3	No info
Jack Herer- NM 8b	20	No info														Superman OG- NM 6a	21.31	No info
Holy Grail - NM 8b	20	No info														Prereoll- Mota- Vator- NM 9	21.38	No info
Jack Herer -NM 8c	20	No info														Blue Tara- NM 14	21.4	0.01
Ghost Train Haze- NM 8d	20	No info														Cookies and Cream- NM 12a	21.41	0
Longbottom Leaf- NM 13a	20	0.01														Cookies and Cream- NM 12b	21.41	No info
Bruce Banner's Ghost- NM 13a	20	0.06														Dark Shadow Haze- NM 3a	21.5	0.01
Tangerine Kush- NM 13a	20	0.01														Jack Herer- NM 7a	21.5	No info
Rare Darkness- NM 13a	20	0.01														Jack Herer- NM 7b	21.5	No info
Boy Scout Cookie- NM 13a	20	0.01														Dark Shadow Haze- NM 3d	21.5	0.01
Longbottom Leaf- NM 13b	20	0.01														Dark Shadow Haze- NM 3b	21.5	0.01
Bruce Banner's Ghost- NM 13b	20	0.06														Dark Shadow Haze- NM 3c	21.5	0.01
Tangerine Kush- NM 13b	20	0.01														Strawberry Fields- NM 14	21.51	0.08
Rare Darkness- NM 13b	20	0.01														Holy Goat- NM 9	21.57	No info
Boy Scout Cookie- NM 13b	20	0.01														Dosi Pie- NM 6b	21.81	No info
Blue Dream- NM 5b	20	No info														Ghost Town- NM 12a	21.86	0
Flo- NM 5b	20	No info														Ghost Town (pre roll)- NM 12a	21.86	No info
Cookies n chem- NM 5b	20	No info														Master Kush- NM 14	21.9	0.33
Do-Si-Dos- NM 5b	20	No info														White Berry Sativa- NM 1	22	No info
Mr. Nice Guy- NM 5b	20	No info														Raspberry Diesel- NM 2	22	0
Cookies n Chem- NM 5c	20	No info														Gorilla Wreck- NM 2	22	0
OGKB- NM 6h	20.21	No info														Banana Split- NM 7a	22	No info
Jack Herer- NM 8e	20.25	No info														Banana Split- NM 7b	22	No info
Agent Orange- NM 14	20.25	0.39														Chemsys- NM 13a	22	0.01
Vanilla Kush- NM 8a	20.3	No info														Chemsys- NM 13b	22	0.01
Desert Diesel- NM 14a	20.3	No info														Master Kush- NM 5b	22	No info
Blueberry Gum- NM 15	20.31	No info														Doc Holiday (pre roll)- NM 12a	22.01	No info
White Lavendar- NM 14	20.31	0.22														Doc Holiday (Indica preroll)- NM 12b	22.01	No info
Bio-Chem- NM 16	20.32	0.01														Gigabud- NM 16	22.12	0.01
Cherry Pie- NM 16	20.38	0.01														Blue Lime Pie- NM 2	22.2	0
Sour Banana Sherbert- NM 14	20.39	0.02														Midas- NM 14d	22.2	No info
G13- NM 15	20.4	No info														White Cookies- NM 12a	22.26	0
Jack Herer- NM 8a	20.42	No info														White Cookies- NM 12b	22.26	No info
Ace High- NM 2	20.5	0														Rollex OG- NM 3a	22.3	No info
Jelly Breath- NM 6a	20.53	No info														Top Dawg- NM 3a	22.3	No info
Jelly Breath- NM 6b	20.53	No info														Rollex OG- NM 3d	22.3	No info
Jelly Breath- NM 6e	20.53	No info														Top Dawg- NM 3d	22.3	No info
Jelly Breath- NM 6g	20.53	No info														Rollex OG- NM 3b	22.3	No info
Platinum Gorilla- NM 6e	20.54	No info														Top Dawg- NM 3b	22.3	No info
Platinum Gorilla- NM 6h	20.54	No info														Rollex OG- NM 3c	22.3	No info
Chocolate Heaven- NM 14c	20.55	No info														Top Dawg- NM 3c	22.3	No info
Lavendar- NM 11a	20.57	0														Larry OG Kush- NM 16	22.34	0.01
Lavendar- NM 11b	20.57	0														White Cookies- NM 6h	22.38	No info
Sunset Sherbet- NM 16	20.58	0.01														Power Nap- NM 6a	22.47	No info
Blue Dream- NM 15b	20.58	0.09														Power Nap-NM 6c	22.47	No info
Blue Dream- NM 15a	20.58	0.09														Power Nap- NM 6e	22.47	No info
QRAZY TRAIN- NM 14	20.59	0.51														Power Nap- NM 6g	22.47	No info
Jilly Bean- NM 14	20.65	0.36														Power Nap- NM 6h	22.47	No info
Mimosa- NM 12a	20.67	0														Power Nap- NM 6i	22.47	No info
Mimosa - NM 12b	20.67	No info														Purple Haze- NM 15	22.5	No info
Lemon Thai Kush- NM 14	20.69	0.21														S.A.G.E.- NM 14	22.55	0.06
Mandarin Cookies- NM 12a	20.7	0														Wild Thailand- NM 15	22.56	No info
Mandarin Cookies- NM 12b	20.7	No info														King Tut- NM 15	22.56	No info
Raspberry Diesel- NM 14	20.73	0.05														Girl Scout Cookies-NM 3a	22.6	No info
Mr. Nice- NM 14	20.75	0.19														Girl Scout Cookies- NM 3d	22.6	No info
Elephant Stomper x Star Dawg (indica preroll)- NM 12b	20.76	No info														Gorilla Glue #4- NM 6h	22.6	0.04
Black D.O.G.- NM 14	20.78	0.06														Ghost Train Haze- NM 8e	22.7	No info
Elmer's Glue- NM 6a	20.83	No info														Petroleum Nightmare- NM 14a	22.75	No info
Elmer's Glue- NM 6b	20.83	No info														Petroleum Nightmare- NM 14d	22.75	No info
Elmer's Glue-NM 6c	20.83	No info														Liberty Haze- NM 3b	22.76	0.07
Elmer's Glue- NM 12a	20.83	0														Liberty Haze- NM 3c	22.76	0.07
Elmer's Glue (pre roll)- NM 12a	20.83	No info														Super Silver Haze- NM 15b	22.87	No info
Elmers Glue (Indica preroll)- NM 12b	20.83	No info														Moonshine's Ghost Train- NM 3b	22.87	No info
Darkstar- NM 16	20.83	0.01														Super Silver Haze- NM 15a	22.87	No info
Nightmare Cookies- NM 3a	20.85	No info														Moonshine's Ghost Train- NM 3c	22.87	No info
Jedi Kush- NM 3a	20.85	No info														Hawaiian Truth Sativa- NM 1	23	No info
Nightmare Cookies- NM 3d	20.85	No info														Blue Dream Indica- NM 1	23	No info
Jedi Kush- NM 3d	20.85	No info														Warlock- NM 8b	23	No info
Nightmare Cookies- NM 3b	20.85	No info														Trapstar -NM 8c	23	No info
Jedi Kush- NM 3b	20.85	No info														Indica Mix Bag -NM 8c	23	No info
Nightmare Cookies- NM 3c	20.85	No info														Cataract Kush- NM 8d	23	No info
Ghost Town (Indica preroll)- NM 12b	20.88	No info														Warlock- NM 8d	23	No info
Cherry O's- NM 2	20.9	0														Grand Daddy Purple- NM 15	23	No info
Pineapple Express- NM 3a	20.9	0.01														Grizzly Kush- NM 3b	23	0
Pineapple Express- NM 3d	20.9	0.01														Hells Angels OG- NM 5b	23	No info
Blueberry x Headband- NM 9	20.93	No info														Hell's Angels OG- NM 5c	23	No info
Durango OG- NM 9	20.94	No info														Strawberry Blonde- NM 9	23.02	No info
Gypsy Widow- NM 14b	20.97	No info														Blue Steel- NM 3a	23.03	No info
Hello Mota- NM 5a	21	No info														Blue Steel- NM 3d	23.03	No info
Cali Dragon - NM 7a	21	No info														Blue Steel- NM 3b	23.03	No info
Cali Dragon - NM 7b	21	No info														Blue Dream- NM 4a	23.07	No info
Ghost Train Haze- NM 8b	21	No info														Doc Holiday- NM 12a	23.11	0
French Bread- NM 8b	21	No info														Blackberry Kush- NM 14	23.11	0.64
Holy Grail Kush- NM 8d	21	No info														Sherb Breath- NM 15a	23.19	No info
Colorado Clementines- NM 9	21	No info														Ken's OG- NM 14c	23.21	No info
Gorilla Glue- NM 13a	21	0.05														Ken's OG- NM 14d	23.21	No info
Rare Dream- NM 13a	21	0.06														Trapstar- NM 8a	23.25	No info
Blue Dream- NM 13a	21	0.01														Neopolitan- NM 14	23.25	0.31
Gorilla Glue- NM 13b	21	0.05														Grease Monkey- NM 12a	23.26	0
Rare Dream- NM 13b	21	0.06														Super Sour Fire OG- NM 12a	23.28	0
Blue Dream- NM 13b	21	0.01														Taffle- NM 14	23.31	0.09
Gorilla Glue #4- NM 5b	21	No info														24K Gold- NM 3a	23.35	No info
Lucinda- NM 5b	21	No info														24K Gold- NM 3d	23.35	No info
Rebel Cookies- NM 3a	21.01	No info														Doc Holiday- NM 12b	23.4	No info
Rebel Cookies- NM 3d	21.01	No info														Purple Punch- NM 2	23.5	0
Rebel Cookies- NM 3c	21.01	No info														Lucinda Williams- NM 4b	23.56	No info
Neville's Haze- NM 14c	21.1	No info														Obi-Wan Kush- NM 15	23.6	No info
Super Lemon Haze- NM 8e	21.13	No info														Warlock- NM 8a	23.67	No info
Alien Rift- NM 3c	21.25	No info														Grand OG- NM 2	23.8	0
Lost Coast OG- NM 2	21.3	0														Jungle Spice- NM 14	23.82	0.02
Rosetta Stone- NM 3a	21.3	No info														Ice Cream Cake- NM 9	23.9	No info
Rosetta Stone- NM 3d	21.3	No info														Grimace- NM 15b	23.99	No info
Jelly Breath- NM 6h	21.3	0.07														Grimace- NM 15a	23.99	No info
Jelly Breath- NM 6i	21.3	0.07														Sour Tangie- NM 7a	24	No info
Rosetta Stone- NM 3c	21.3	No info														Sour Tangie- NM 7b	24	No info
Superman OG- NM 6a	21.31	No info														Cataract Kush- NM 8b	24	No info
Prereoll- Mota- Vator- NM 9	21.38	No info														Silver Kush- NM 8b	24	No info
Blue Tara- NM 14	21.4	0.01														Trapstar - NM 8b	24	No info
Cookies and Cream- NM 12a	21.41	0														Cataract Kush -NM 8c	24	No info
Cookies and Cream- NM 12b	21.41	No info														Silver Kush -NM 8c	24	No info
Dark Shadow Haze- NM 3a	21.5	0.01														Warlock -NM 8c	24	No info
Jack Herer- NM 7a	21.5	No info														Jack Herer- NM 8d	24	No info
Jack Herer- NM 7b	21.5	No info														Vanilla Kush- NM 8d	24	No info
Dark Shadow Haze- NM 3d	21.5	0.01														Silver Kushk- NM 8d	24	No info
Dark Shadow Haze- NM 3b	21.5	0.01														Buddha Tahoe- NM 13a	24	0.06
Dark Shadow Haze- NM 3c	21.5	0.01														Buddha Tahoe- NM 13b	24	0.06
Strawberry Fields- NM 14	21.51	0.08														Jah OG Kush- NM 5b	24	No info
Holy Goat- NM 9	21.57	No info														3 Pac (pre roll)- NM 12a	24.02	No info
Dosi Pie- NM 6b	21.81	No info														Venom OG- NM 9	24.21	No info
Ghost Town- NM 12a	21.86	0														Preroll-Indica Blend- NM 9	24.21	No info
Ghost Town (pre roll)- NM 12a	21.86	No info														First 48-NM 6c	24.27	No info
Master Kush- NM 14	21.9	0.33														First 48- NM 12b	24.27	No info
White Berry Sativa- NM 1	22	No info														B-Witched- NM 9	24.39	No info
Raspberry Diesel- NM 2	22	0														Clementine #8- NM 7a	24.5	No info
Gorilla Wreck- NM 2	22	0														Gorilla Glue #4- NM 7a	24.5	No info
Banana Split- NM 7a	22	No info														Clementine #8- NM 7b	24.5	No info
Banana Split- NM 7b	22	No info														Gorilla Glue - NM 7b	24.5	No info
Chemsys- NM 13a	22	0.01														Warlock- NM 8e	24.57	No info
Chemsys- NM 13b	22	0.01														Bubba Kush- NM 14c	24.57	No info
Master Kush- NM 5b	22	No info														Hash Passion- NM 15	24.6	No info
Doc Holiday (pre roll)- NM 12a	22.01	No info														Cataract Kush- NM 8a	24.63	No info
Doc Holiday (Indica preroll)- NM 12b	22.01	No info														Tangie- NM 14	24.81	0.56
Gigabud- NM 16	22.12	0.01														SinMint Cookies- NM 9	24.89	No info
Blue Lime Pie- NM 2	22.2	0														Blue Dream- NM 2	24.9	0
Midas- NM 14d	22.2	No info														24K Gold- NM 14	24.9	0.04
White Cookies- NM 12a	22.26	0														Silver Kush- NM 8a	24.97	No info
White Cookies- NM 12b	22.26	No info														Elmers Glue- NM 12b	24.97	No info
Rollex OG- NM 3a	22.3	No info														Silver Kushk- NM 8e	24.97	No info
Top Dawg- NM 3a	22.3	No info														OG Ghost Train Haze- NM 14	24.97	0.43
Rollex OG- NM 3d	22.3	No info														Blue Dream- NM 14	24.99	0.46
Top Dawg- NM 3d	22.3	No info														Lucinda- NM 5a	25	No info
Rollex OG- NM 3b	22.3	No info														Tangie- NM 7a	25	No info
Top Dawg- NM 3b	22.3	No info														Chem 91- NM 7a	25	No info
Rollex OG- NM 3c	22.3	No info														Tangie- NM 7b	25	No info
Top Dawg- NM 3c	22.3	No info														Chem 91- NM 7b	25	No info
Larry OG Kush- NM 16	22.34	0.01														Purple Kush - NM 8b	25	No info
White Cookies- NM 6h	22.38	No info														Vanilla Kush -NM 8c	25	No info
Power Nap- NM 6a	22.47	No info														Pruple Lemon Ghost Buster- NM 13a	25	0.03
Power Nap-NM 6c	22.47	No info														Cannatonic- NM 6d	25	0.04
Power Nap- NM 6e	22.47	No info														Pruple Lemon Ghost Buster- NM 13b	25	0.03
Power Nap- NM 6g	22.47	No info														Cataract Kush- NM 8e	25.05	No info
Power Nap- NM 6h	22.47	No info														Strawberry OG- NM 9	25.14	No info
Power Nap- NM 6i	22.47	No info														Hybrid preroll- NM 12b	25.14	No info
Purple Haze- NM 15	22.5	No info														Mimosa (pre roll)- NM 12a	25.18	No info
S.A.G.E.- NM 14	22.55	0.06														First 48- NM 12a	25.32	0
Wild Thailand- NM 15	22.56	No info														Sophies Breath- NM 11b	25.42	0
King Tut- NM 15	22.56	No info														Sophies Breath- NM 11a	25.43	0
Girl Scout Cookies-NM 3a	22.6	No info														Sophie's Breath- NM 15a	25.43	No info
Girl Scout Cookies- NM 3d	22.6	No info														Golden Strawberries- NM 2	25.5	0
Gorilla Glue #4- NM 6h	22.6	0.04														Sour Banana Sherbert #12- NM 7a	25.5	No info
Ghost Train Haze- NM 8e	22.7	No info														Sour Banana Sherbert #12- NM 7b	25.5	No info
Petroleum Nightmare- NM 14a	22.75	No info														Vanilla Kush- NM 8e	25.82	No info
Petroleum Nightmare- NM 14d	22.75	No info														Skywalker Kush- NM 2	25.9	0
Liberty Haze- NM 3b	22.76	0.07														Blueberry- NM 14b	25.92	No info
Liberty Haze- NM 3c	22.76	0.07														Holy Grail Kush- NM 6a	25.94	No info
Super Silver Haze- NM 15b	22.87	No info														Holy Grail Kush- NM 6b	25.94	No info
Moonshine's Ghost Train- NM 3b	22.87	No info														Holy Grail Kush-NM 6c	25.94	No info
Super Silver Haze- NM 15a	22.87	No info														Holy Grail Kush- NM 6g	25.94	No info
Moonshine's Ghost Train- NM 3c	22.87	No info														Holy Grail Kush- NM 6h	25.94	No info
Hawaiian Truth Sativa- NM 1	23	No info														Holy Grail Kush- NM 6i	25.94	No info
Blue Dream Indica- NM 1	23	No info														Sour Deisel Sativa- NM 1	26	No info
Warlock- NM 8b	23	No info														Banana Cream- NM 2	26	0
Trapstar -NM 8c	23	No info														Chocolate Trip- NM 7a	26	No info
Indica Mix Bag -NM 8c	23	No info														Chocolate Trip- NM 7b	26	No info
Cataract Kush- NM 8d	23	No info														Skywalker OG- NM 8b	26	No info
Warlock- NM 8d	23	No info														Ghost Train Haze -NM 8c	26	No info
Grand Daddy Purple- NM 15	23	No info														Skywalker OG -NM 8c	26	No info
Grizzly Kush- NM 3b	23	0														Skywalker OG- NM 8d	26	No info
Hells Angels OG- NM 5b	23	No info														Brandywine- NM 14b	26.01	No info
Hell's Angels OG- NM 5c	23	No info														Amnesia- NM 15	26.1	No info
Strawberry Blonde- NM 9	23.02	No info														Irene X Alien Dawg- NM 12a	26.43	0
Blue Steel- NM 3a	23.03	No info														Irene X Aliendawg (pre roll)- NM 12a	26.43	No info
Blue Steel- NM 3d	23.03	No info														Irene x Alien Dawg preroll- NM 12b	26.43	No info
Blue Steel- NM 3b	23.03	No info														Ghost Train Haze- NM 8a	26.47	No info
Blue Dream- NM 4a	23.07	No info														Platinum Delights- NM 3a	26.58	No info
Doc Holiday- NM 12a	23.11	0														Pura Vida X Polar Bear OG- NM 12a	26.6	0
Blackberry Kush- NM 14	23.11	0.64														Pura Vida x Polar Bear OG- NM 12b	26.6	No info
Sherb Breath- NM 15a	23.19	No info														Bandit Breath- NM 11a	26.62	0
Ken's OG- NM 14c	23.21	No info														Bandit Breath- NM 15a	26.62	No info
Ken's OG- NM 14d	23.21	No info														Bandit Breath- NM 11b	26.62	0
Trapstar- NM 8a	23.25	No info														Orange Cream- NM 14	26.74	0.1
Neopolitan- NM 14	23.25	0.31														Peanut Butter Breath- NM 11a	26.81	0
Grease Monkey- NM 12a	23.26	0														Peanut Butter Breath- NM 11b	26.81	0
Super Sour Fire OG- NM 12a	23.28	0														OG-OG Sativa- NM 1	27	No info
Taffle- NM 14	23.31	0.09														Banana Kush- NM 7a	27.3	No info
24K Gold- NM 3a	23.35	No info														Banana Kush- NM 7b	27.3	No info
24K Gold- NM 3d	23.35	No info														Cotton Candy Kush- NM 7a	28	No info
Doc Holiday- NM 12b	23.4	No info														Cotton Candy- NM 7b	28	No info
Purple Punch- NM 2	23.5	0														White Fire OG- NM 9	28.11	No info
Lucinda Williams- NM 4b	23.56	No info														Silver Kush- NM 6c	28.29	No info
Obi-Wan Kush- NM 15	23.6	No info														Silver Kush- NM 6i	28.29	No info
Warlock- NM 8a	23.67	No info														91 Chem x Chem 4- NM 11a	28.37	0
Grand OG- NM 2	23.8	0														Hells Fire #2- NM 7a	28.4	No info
Jungle Spice- NM 14	23.82	0.02														Hells Fire 2- NM 7b	28.4	No info
Ice Cream Cake- NM 9	23.9	No info														Stardawg Guava- NM 7a	28.6	No info
Grimace- NM 15b	23.99	No info														Clusterfunk- NM 7b	28.6	No info
Grimace- NM 15a	23.99	No info														Stardawg Guava- NM 7b	28.6	No info
Sour Tangie- NM 7a	24	No info														Presidential Kush- NM 9	28.81	No info
Sour Tangie- NM 7b	24	No info														Silver Kush- NM 6a	28.9	No info
Cataract Kush- NM 8b	24	No info														Buddha Tahoe- NM 8b	29	No info
Silver Kush- NM 8b	24	No info														Fruity Chronic Juice- NM 9	29.04	No info
Trapstar - NM 8b	24	No info														Kosher Kush- NM 9	29.05	No info
Cataract Kush -NM 8c	24	No info														Buddha Tahoe- NM 8a	29.16	No info
Silver Kush -NM 8c	24	No info														Buddha Tahoe OG- NM 8e	29.16	No info
Warlock -NM 8c	24	No info														Buddha Tahoe- NM 6a	29.61	No info
Jack Herer- NM 8d	24	No info														Buddha Tahoe OG- NM 6h	29.61	No info
Vanilla Kush- NM 8d	24	No info														Girl Scout Yeti- NM 7a	30	No info
Silver Kushk- NM 8d	24	No info														Girl Scout Yeti- NM 7b	30	No info
Buddha Tahoe- NM 13a	24	0.06														Green Crack- NM 11b	45.96	No info
Buddha Tahoe- NM 13b	24	0.06														Durban Poison- NM 11b	51.77	No info
Jah OG Kush- NM 5b	24	No info
3 Pac (pre roll)- NM 12a	24.02	No info
Venom OG- NM 9	24.21	No info
Preroll-Indica Blend- NM 9	24.21	No info
First 48-NM 6c	24.27	No info
First 48- NM 12b	24.27	No info
B-Witched- NM 9	24.39	No info
Clementine #8- NM 7a	24.5	No info
Gorilla Glue #4- NM 7a	24.5	No info
Clementine #8- NM 7b	24.5	No info
Gorilla Glue - NM 7b	24.5	No info
Warlock- NM 8e	24.57	No info
Bubba Kush- NM 14c	24.57	No info
Hash Passion- NM 15	24.6	No info
Cataract Kush- NM 8a	24.63	No info
Tangie- NM 14	24.81	0.56
SinMint Cookies- NM 9	24.89	No info
Blue Dream- NM 2	24.9	0
24K Gold- NM 14	24.9	0.04
Silver Kush- NM 8a	24.97	No info
Elmers Glue- NM 12b	24.97	No info
Silver Kushk- NM 8e	24.97	No info
OG Ghost Train Haze- NM 14	24.97	0.43
Blue Dream- NM 14	24.99	0.46
Lucinda- NM 5a	25	No info
Tangie- NM 7a	25	No info
Chem 91- NM 7a	25	No info
Tangie- NM 7b	25	No info
Chem 91- NM 7b	25	No info
Purple Kush - NM 8b	25	No info
Vanilla Kush -NM 8c	25	No info
Pruple Lemon Ghost Buster- NM 13a	25	0.03
Cannatonic- NM 6d	25	0.04
Pruple Lemon Ghost Buster- NM 13b	25	0.03
Cataract Kush- NM 8e	25.05	No info
Strawberry OG- NM 9	25.14	No info
Hybrid preroll- NM 12b	25.14	No info
Mimosa (pre roll)- NM 12a	25.18	No info
First 48- NM 12a	25.32	0
Sophies Breath- NM 11b	25.42	0
Sophies Breath- NM 11a	25.43	0
Sophie's Breath- NM 15a	25.43	No info
Golden Strawberries- NM 2	25.5	0
Sour Banana Sherbert #12- NM 7a	25.5	No info
Sour Banana Sherbert #12- NM 7b	25.5	No info
Vanilla Kush- NM 8e	25.82	No info
Skywalker Kush- NM 2	25.9	0
Blueberry- NM 14b	25.92	No info
Holy Grail Kush- NM 6a	25.94	No info
Holy Grail Kush- NM 6b	25.94	No info
Holy Grail Kush-NM 6c	25.94	No info
Holy Grail Kush- NM 6g	25.94	No info
Holy Grail Kush- NM 6h	25.94	No info
Holy Grail Kush- NM 6i	25.94	No info
Sour Deisel Sativa- NM 1	26	No info
Banana Cream- NM 2	26	0
Chocolate Trip- NM 7a	26	No info
Chocolate Trip- NM 7b	26	No info
Skywalker OG- NM 8b	26	No info
Ghost Train Haze -NM 8c	26	No info
Skywalker OG -NM 8c	26	No info
Skywalker OG- NM 8d	26	No info
Brandywine- NM 14b	26.01	No info
Amnesia- NM 15	26.1	No info
Irene X Alien Dawg- NM 12a	26.43	0
Irene X Aliendawg (pre roll)- NM 12a	26.43	No info
Irene x Alien Dawg preroll- NM 12b	26.43	No info
Ghost Train Haze- NM 8a	26.47	No info
Platinum Delights- NM 3a	26.58	No info
Pura Vida X Polar Bear OG- NM 12a	26.6	0
Pura Vida x Polar Bear OG- NM 12b	26.6	No info
Bandit Breath- NM 11a	26.62	0
Bandit Breath- NM 15a	26.62	No info
Bandit Breath- NM 11b	26.62	0
Orange Cream- NM 14	26.74	0.1
Peanut Butter Breath- NM 11a	26.81	0
Peanut Butter Breath- NM 11b	26.81	0
OG-OG Sativa- NM 1	27	No info
Banana Kush- NM 7a	27.3	No info
Banana Kush- NM 7b	27.3	No info
Cotton Candy Kush- NM 7a	28	No info
Cotton Candy- NM 7b	28	No info
White Fire OG- NM 9	28.11	No info
Silver Kush- NM 6c	28.29	No info
Silver Kush- NM 6i	28.29	No info
91 Chem x Chem 4- NM 11a	28.37	0
Hells Fire #2- NM 7a	28.4	No info
Hells Fire 2- NM 7b	28.4	No info
Stardawg Guava- NM 7a	28.6	No info
Clusterfunk- NM 7b	28.6	No info
Stardawg Guava- NM 7b	28.6	No info
Presidential Kush- NM 9	28.81	No info
Silver Kush- NM 6a	28.9	No info
Buddha Tahoe- NM 8b	29	No info
Fruity Chronic Juice- NM 9	29.04	No info
Kosher Kush- NM 9	29.05	No info
Buddha Tahoe- NM 8a	29.16	No info
Buddha Tahoe OG- NM 8e	29.16	No info
Buddha Tahoe- NM 6a	29.61	No info
Buddha Tahoe OG- NM 6h	29.61	No info
Girl Scout Yeti- NM 7a	30	No info
Girl Scout Yeti- NM 7b	30	No info
Green Crack- NM 11b	45.96	No info
Durban Poison- NM 11b	51.77	No info
AVG	19.2176	2.94673			3.25524	11.5865			7.5644	12.0896			13.4864	3.52714			20.9178	0.0946207
SD	5.55025	5.22805			1.54524	2.78366			1.22271	3.85357			1.48941	4.80403			3.7827	0.192549
N	668	211			21	20			25	25			58	21			564	145

## Sheet: Colorado- Med
Strain	THC	CBD		Strain < 5%	THC	CBD		Strain 5 - 10% THC	THC	CBD		Strain 10-15% THC	THC	CBD		Strain > 15% THC	THC	CBD
Th Wife- C21	0.3	12		Th Wife- C21	0.3	12		Harlequin- C4a	5.02	7.8		Pre 98- C11	10.01	13.98		Honolulu Choo Choo- C22	15.06	0.03
Cannatonic #1- C32	1.5	12		Cannatonic #1- C32	1.5	12		Harlequin- C4b	5.02	7.8		Flo- C3	10.2	NO INFO		Recon- C3	15.3	NO INFO
Chocolate Fudge Brownie- C38	2.4	22		Chocolate Fudge Brownie- C38	2.4	22		Harlequin- C4c	5.02	7.8		Agent Orange- C6	10.57	0		Corleone Kush- C11	15.43	NO INFO
Gold 4:1 CBD/THC (Pre-roll)- C5	2.86	12.18		Gold 4:1 CBD/THC (Pre-roll)- C5	2.86	12.18		CBD Shark Shock- C23	5.55	8		Grape Stomper- C38	11.8	9		Tangerine Haze- C38	15.6	NO INFO
Bubonic Chronic- C14	4.05	15.94		Bubonic Chronic- C14	4.05	15.94		Good Medicine CBD- C1	5.6	8.7		Lamb's Bread- C21	12	1.27		Cali. Orange- C19	15.8	No INFO
CBD Therapy- C19	4.1	NO INFO		CBD Therapy- C19	4.1	NO INFO		Canna Tsu- C37b	5.77	8.83		Incredible Power- C27b	12	12		Aj's Cherry AK- C24	16	0.5
Harlequin- C4a	5.02	7.8						Euphoria- C23	6.05	8.45		Mint Chocolate Chip Joint- C22	12.08	NO INFO		Bubba Diagonal- C30	16.08	NO INFO
Harlequin- C4b	5.02	7.8						Medical Mass- C23	6.3	9.2		Mango Haze- C1	12.2	6.2		Jilly Bean- C11	16.23	NO INFO
Harlequin- C4c	5.02	7.8						Blue Dream- C37b	6.32	NO INFO		Orange Blossom Express- C22	12.5	0.02		Jilly Bean- C11	16.23	NO INFO
CBD Shark Shock- C23	5.55	8						Good medicine - C15	6.33	9.11		Platinum- C37b	13.12	NO INFO		Double Bubba- C22	16.23	0.07
Good Medicine CBD- C1	5.6	8.7						CBD Nordle- C23	6.4	8		Karma B- C1	13.2	NO INFO		Commerce City Kush- C1	16.3	NO INFO
Canna Tsu- C37b	5.77	8.83						Strawberry Cookies- Flower- BWC- C22	6.72	10.04		Tahoe OG- C3	13.3	NO INFO		NYC Diesel- C12	16.38	NO INFO
Euphoria- C23	6.05	8.45						High CBD/Low THC (Pre-roll)- C5	6.9	12.13		O.G. Kush- C19	13.3	No INFO		Diesel Train- C22	16.42	0.03
Medical Mass- C23	6.3	9.2						High CBD/Low THC (Pre-roll)- C5	6.9	12.14		Circus Freak- C22	13.93	0.02		Gelato- C13a	16.44	0.59
Blue Dream- C37b	6.32	NO INFO						Harlequin #5 CBD- C1	7.8	12.4		Taffie- C1	14	NO INFO		Gelato- C13b	16.44	0.59
Good medicine - C15	6.33	9.11						Red Velvet- C23	8.7	14.5		Hashplant x Super Silver Haze- C32	14	NO INFO		Chem Dawg- C1	16.5	NO INFO
CBD Nordle- C23	6.4	8						Pre 98 Bubba- C13a	8.82	15.63		Blueberry- C19	14.3	NO INFO		Big Buddha Cheese- C19	16.5	NO INFO
Strawberry Cookies- Flower- BWC- C22	6.72	10.04						Pre 98 Bubba- C13b	8.82	15.63		Purple God Bud- C6	14.325	0		Jelly Roll Pre-roll- C23	16.5	NO INFO
High CBD/Low THC (Pre-roll)- C5	6.9	12.13						Lucy #2- C36	9	NO INFO		Maui Wowi- C1	14.5	NO INFO		Tangerine Kush- C36	16.5	NO INFO
High CBD/Low THC (Pre-roll)- C5	6.9	12.14						Yum- C38	9.07	NO INFO		Jabberwokcy- C1	14.5	NO INFO		Jack Flash- C13a	16.51	0
Harlequin #5 CBD- C1	7.8	12.4						Critical Mass- C32	10	5		Orange Herijuana- C4a	14.67	0		Jack Flash- C13b	16.51	0
Red Velvet- C23	8.7	14.5						Specturm #12 Cannabis- C29	7.6	9.8		Orange Herijuana- C4b	14.67	0		Super Lemon Haze- C13a	16.54	0
Pre 98 Bubba- C13a	8.82	15.63										Orange Herijuana- C4c	14.67	0		Super Lemon Haze- C13b	16.54	0
Pre 98 Bubba- C13b	8.82	15.63										Candyland- C1	14.8	NO INFO		Highway Man- C30	16.6	NO INFO
Lucy #2- C36	9	NO INFO										Grape Kush- C22	14.8	0.06		Black Gorilla (Pre-roll)- C5	16.66	NO INFO
Yum- C38	9.07	NO INFO										Damn Sour- C23	15	No INFO		Sour Patch Cookies (Pre-roll)- C5	16.78	NO INFO
Critical Mass- C32	10	5										Thai Lights- C32	15	NO INFO		Columbian Gold x C-99- C1	16.9	NO INFO
Specturm #12 Cannabis- C29	7.6	9.8														Double Tangie Banana- C1	16.9	NO INFO
Pre 98- C11	10.01	13.98														Lifesaver- C4a	16.91	0
Flo- C3	10.2	NO INFO														Lifesaver- C4b	16.91	0
Agent Orange- C6	10.57	0														Lifesaver- C4c	16.91	0
Grape Stomper- C38	11.8	9														Mimosa- C27b	17	0.25
Lamb's Bread- C21	12	1.27														Phishhead Kush- C13a	17.03	0
Incredible Power- C27b	12	12														Phishhead Kush- C13b	17.03	0
Mint Chocolate Chip Joint- C22	12.08	NO INFO														Golden Goat- C1	17.1	NO INFO
Mango Haze- C1	12.2	6.2														Tangie- C1	17.1	No INFO
Orange Blossom Express- C22	12.5	0.02														Flo- C19	17.1	NO INFO
Platinum- C37b	13.12	NO INFO														Alley Cat Kush- C13a	17.11	0
Karma B- C1	13.2	NO INFO														Alley Cat Kush- C13b	17.11	0
Tahoe OG- C3	13.3	NO INFO														Panama Punch- C13a	17.18	0
O.G. Kush- C19	13.3	No INFO														Panama Punch- C13b	17.18	0
Circus Freak- C22	13.93	0.02														Green Crack- C3	17.37	NO INFO
Taffie- C1	14	NO INFO														Stink Bomb- Flower- BWC- C22	17.4	NO INFO
Hashplant x Super Silver Haze- C32	14	NO INFO														Afghan (Pre-roll)- C5	17.46	NO INFO
Blueberry- C19	14.3	NO INFO														Sleeping Monkey- C22	17.46	0.03
Purple God Bud- C6	14.325	0														Christmas Cookies- C3	17.49	NO INFO
Maui Wowi- C1	14.5	NO INFO														Oregon Diesel (Pre-roll)- C5	17.5	0.08
Jabberwokcy- C1	14.5	NO INFO														Afghani- C29	17.5	NO INFO
Orange Herijuana- C4a	14.67	0														Skunk #1- C19	17.6	NO INFO
Orange Herijuana- C4b	14.67	0														Tangie- C13a	17.63	0
Orange Herijuana- C4c	14.67	0														Tangie- C13b	17.63	0
Candyland- C1	14.8	NO INFO														Alpenglow- C6	17.67	0
Grape Kush- C22	14.8	0.06														12 Year OG- C13a	17.68	0
Damn Sour- C23	15	No INFO														12 Year OG- C13b	17.68	0
Thai Lights- C32	15	NO INFO														Blue Dream (Pre-roll)- C5	17.76	NO INFO
Honolulu Choo Choo- C22	15.06	0.03														Jack La Mota- C19	17.8	NO INFO
Recon- C3	15.3	NO INFO														Chunky Diesel- C19	17.9	NO INFO
Corleone Kush- C11	15.43	NO INFO														Jilly Bean- C4a	17.92	0
Tangerine Haze- C38	15.6	NO INFO														Jilly Bean- C4b	17.92	0
Cali. Orange- C19	15.8	No INFO														Jilly Bean- C4c	17.92	0
Aj's Cherry AK- C24	16	0.5														Bubba Kush- C32	18	NO INFO
Bubba Diagonal- C30	16.08	NO INFO														Headband- C37b	18.01	NO INFO
Jilly Bean- C11	16.23	NO INFO														Spicy Disco- C13a	18.02	0
Jilly Bean- C11	16.23	NO INFO														Spicy Disco- C13b	18.02	0
Double Bubba- C22	16.23	0.07														White Widow- BWC- BB- C22	18.07	0.5
Commerce City Kush- C1	16.3	NO INFO														Island Sweet Skunk - C19	18.1	NO INFO
NYC Diesel- C12	16.38	NO INFO														Crazy Glue- C12	18.25	NO INFO
Diesel Train- C22	16.42	0.03														Rift Valley Durban Poison- C19	18.3	NO INFO
Gelato- C13a	16.44	0.59														Herijuana- C19	18.3	NO INFO
Gelato- C13b	16.44	0.59														Northern Lights- C4a	18.33	0
Chem Dawg- C1	16.5	NO INFO														Tropicana- C5	18.33	NO INFO
Big Buddha Cheese- C19	16.5	NO INFO														Northern Lights- C4b	18.33	0
Jelly Roll Pre-roll- C23	16.5	NO INFO														Northern Lights- C4c	18.33	0
Tangerine Kush- C36	16.5	NO INFO														Maui Wowie- C13a	18.34	0
Jack Flash- C13a	16.51	0														Maui Wowie- C13b	18.34	0
Jack Flash- C13b	16.51	0														Jim OG- C13a	18.36	0.67
Super Lemon Haze- C13a	16.54	0														Jim OG- C13b	18.36	0.67
Super Lemon Haze- C13b	16.54	0														Headwreck- C22	18.38	0.08
Highway Man- C30	16.6	NO INFO														NYC CHEM/GG- C31	18.4	1.03
Black Gorilla (Pre-roll)- C5	16.66	NO INFO														Blue Dream- C38	18.4	NO INFO
Sour Patch Cookies (Pre-roll)- C5	16.78	NO INFO														Cinderella 99- C13a	18.45	0
Columbian Gold x C-99- C1	16.9	NO INFO														Cinderella 99- C13b	18.45	0
Double Tangie Banana- C1	16.9	NO INFO														Cherry Lime Haze- C29	18.5	NO INFO
Lifesaver- C4a	16.91	0														Lucky Charms- C29	18.5	NO INFO
Lifesaver- C4b	16.91	0														Rare Darkness- C36	18.5	NO INFO
Lifesaver- C4c	16.91	0														Durban Poison- C11	18.59	NO INFO
Mimosa- C27b	17	0.25														Blueberry- C38	18.6	NO INFO
Phishhead Kush- C13a	17.03	0														Black Gorilla- C5	18.62	NO INFO
Phishhead Kush- C13b	17.03	0														Grape God- C6	18.675	0.1
Golden Goat- C1	17.1	NO INFO														Deadhead OG- C1	18.7	NO INFO
Tangie- C1	17.1	No INFO														Platinum Cookies- BWC- BB- C22	18.75	NO INFO
Flo- C19	17.1	NO INFO														White Widow- C38	18.8	NO INFO
Alley Cat Kush- C13a	17.11	0														Grape God Bud- C13a	18.86	0
Alley Cat Kush- C13b	17.11	0														Grape God Bud- C13b	18.86	0
Panama Punch- C13a	17.18	0														Grape Ape Pre-roll- C23	18.9	NO INFO
Panama Punch- C13b	17.18	0														Strawberry Cough- C13a	18.91	1.31
Green Crack- C3	17.37	NO INFO														Strawberry Cough- C13b	18.91	1.31
Stink Bomb- Flower- BWC- C22	17.4	NO INFO														Lucky Charms (Pre-roll)- C5	18.93	NO INFO
Afghan (Pre-roll)- C5	17.46	NO INFO														Headband- C13a	18.96	0
Sleeping Monkey- C22	17.46	0.03														Headband- C13b	18.96	0
Christmas Cookies- C3	17.49	NO INFO														Citrus Sap #7- C1	19	NO INFO
Oregon Diesel (Pre-roll)- C5	17.5	0.08														Flo (Med)- C21	19	0
Afghani- C29	17.5	NO INFO														Scott's Sour OG- BWC- C22	19	NO INFO
Skunk #1- C19	17.6	NO INFO														Blue Dream- C27b	19	2
Tangie- C13a	17.63	0														Jack Flash- C4a	19.03	0
Tangie- C13b	17.63	0														Jack Flash- C4b	19.03	0
Alpenglow- C6	17.67	0														Jack Flash- C4c	19.03	0
12 Year OG- C13a	17.68	0														Griz Kush- C4a	19.06	0
12 Year OG- C13b	17.68	0														Redheaded Stranger- C5	19.06	NO INFO
Blue Dream (Pre-roll)- C5	17.76	NO INFO														Griz Kush- C4b	19.06	0
Jack La Mota- C19	17.8	NO INFO														Griz Kush- C4c	19.06	0
Chunky Diesel- C19	17.9	NO INFO														Fall 97- C13a	19.09	0.51
Jilly Bean- C4a	17.92	0														Fall 97- C13b	19.09	0.51
Jilly Bean- C4b	17.92	0														Blue Ghost- C24	19.1	NO INFO
Jilly Bean- C4c	17.92	0														Juicy Fruit- C3	19.11	NO INFO
Bubba Kush- C32	18	NO INFO														Chem Dawg- C30	19.135	NO INFO
Headband- C37b	18.01	NO INFO														Lucky Charms (Pre-roll)- C5	19.18	NO INFO
Spicy Disco- C13a	18.02	0														Hash Plant- C19	19.2	NO INFO
Spicy Disco- C13b	18.02	0														Flo- C6	19.21	0
White Widow- BWC- BB- C22	18.07	0.5														Purple OG- C5	19.37	NO INFO
Island Sweet Skunk - C19	18.1	NO INFO														Purple OG (Pre-roll)- C5	19.37	NO INFO
Crazy Glue- C12	18.25	NO INFO														Flo- C4a	19.38	0
Rift Valley Durban Poison- C19	18.3	NO INFO														Flo- C4b	19.38	0
Herijuana- C19	18.3	NO INFO														Flo- C4c	19.38	0
Northern Lights- C4a	18.33	0														Bordello- C29	19.5	NO INFO
Tropicana- C5	18.33	NO INFO														Grape Ape- C29	19.5	NO INFO
Northern Lights- C4b	18.33	0														Critical Mass- C3	19.6	NO INFO
Northern Lights- C4c	18.33	0														Cherry Pie- C13a	19.6	0
Maui Wowie- C13a	18.34	0														Cherry Pie- C13b	19.6	0
Maui Wowie- C13b	18.34	0														AK-47- C24	19.6	NO INFO
Jim OG- C13a	18.36	0.67														Pure Vida- C22	19.65	NO INFO
Jim OG- C13b	18.36	0.67														Pure Vida Joint- C22	19.65	NO INFO
Headwreck- C22	18.38	0.08														501st OG- C36	19.7	NO INFO
NYC CHEM/GG- C31	18.4	1.03														Pineapple Express- C3	19.8	NO INFO
Blue Dream- C38	18.4	NO INFO														Fool's Gold- C19	19.8	NO INFO
Cinderella 99- C13a	18.45	0														Suno Pre-roll- C23	19.8	NO INFO
Cinderella 99- C13b	18.45	0														Durban Poison- C38	19.8	NO INFO
Cherry Lime Haze- C29	18.5	NO INFO														Raskal OG- C13a	19.88	0
Lucky Charms- C29	18.5	NO INFO														Raskal OG- C13b	19.88	0
Rare Darkness- C36	18.5	NO INFO														Axilla- C32	20	NO INFO
Durban Poison- C11	18.59	NO INFO														Jillybean- C32	20	NO INFO
Blueberry- C38	18.6	NO INFO														Nookie #1- C32	20	NO INFO
Black Gorilla- C5	18.62	NO INFO														Southern Charm- C32	20	NO INFO
Grape God- C6	18.675	0.1														Chemodo Kush- C36	20	NO INFO
Deadhead OG- C1	18.7	NO INFO														White Widow- C36	20	NO INFO
Platinum Cookies- BWC- BB- C22	18.75	NO INFO														Mob Boss - C11	20.06	NO INFO
White Widow- C38	18.8	NO INFO														Grunk- C13a	20.12	0
Grape God Bud- C13a	18.86	0														Grunk- C13b	20.12	0
Grape God Bud- C13b	18.86	0														Jenny Kush- C30	20.135	NO INFO
Grape Ape Pre-roll- C23	18.9	NO INFO														East Coast Sour Diesel- C37b	20.14	NO INFO
Strawberry Cough- C13a	18.91	1.31														Leeroy- C5	20.2	NO INFO
Strawberry Cough- C13b	18.91	1.31														Pan - C11	20.2	NO INFO
Lucky Charms (Pre-roll)- C5	18.93	NO INFO														Poseidon OG (Pre-roll)- C5	20.22	NO INFO
Headband- C13a	18.96	0														Sweet Sweet- Flower- BWC- C22	20.26	1.32
Headband- C13b	18.96	0														Sweet Sweet Joint- C22	20.26	0
Citrus Sap #7- C1	19	NO INFO														Sour Diesel- C11	20.27	NO INFO
Flo (Med)- C21	19	0														Light of Jah- C4a	20.3	0
Scott's Sour OG- BWC- C22	19	NO INFO														Light of Jah- C4b	20.3	0
Blue Dream- C27b	19	2														Light of Jah- C4c	20.3	0
Jack Flash- C4a	19.03	0														Shaw Bud- C37b	20.3	NO INFO
Jack Flash- C4b	19.03	0														Chocolate Bomb Joint- C22	20.42	NO INFO
Jack Flash- C4c	19.03	0														Blue Dream- C29	20.5	NO INFO
Griz Kush- C4a	19.06	0														303 OG- C13a	20.52	0
Redheaded Stranger- C5	19.06	NO INFO														303 OG- C13b	20.52	0
Griz Kush- C4b	19.06	0														Ghost OG- C30	20.535	NO INFO
Griz Kush- C4c	19.06	0														Trainwreck- C13a	20.58	0
Fall 97- C13a	19.09	0.51														Trainwreck- C13b	20.58	0
Fall 97- C13b	19.09	0.51														Hemlock- C1	20.6	NO INFO
Blue Ghost- C24	19.1	NO INFO														Bubble Jack- C24	20.635	NO INFO
Juicy Fruit- C3	19.11	NO INFO														OG Kush- C11	20.67	NO INFO
Chem Dawg- C30	19.135	NO INFO														Purple Trainwreck- C23	20.7	NO INFO
Lucky Charms (Pre-roll)- C5	19.18	NO INFO														Key Lime Pie- C13a	20.75	0.6
Hash Plant- C19	19.2	NO INFO														Key Lime Pie- C13b	20.75	0.6
Flo- C6	19.21	0														Sour Banana Sherbert- C1	20.8	NO INFO
Purple OG- C5	19.37	NO INFO														Purple Kush- C24	20.82	NO INFO
Purple OG (Pre-roll)- C5	19.37	NO INFO														Cypress OG- C13a	20.84	0
Flo- C4a	19.38	0														Cypress OG- C13b	20.84	0
Flo- C4b	19.38	0														Ice Cream- C6	20.86	0
Flo- C4c	19.38	0														Skywalker OG- C13a	20.87	0
Bordello- C29	19.5	NO INFO														Skywalker OG- C13b	20.87	0
Grape Ape- C29	19.5	NO INFO														Chem Dawg (Pre-roll)- C5	20.9	NO INFO
Critical Mass- C3	19.6	NO INFO														Blue Dream- C19	20.9	NO INFO
Cherry Pie- C13a	19.6	0														White Widow #47- C19	20.9	NO INFO
Cherry Pie- C13b	19.6	0														White Harley- C19	20.9	NO INFO
AK-47- C24	19.6	NO INFO														Light Of Jah- C36	20.9	NO INFO
Pure Vida- C22	19.65	NO INFO														Alaskan Sweet Skunk- C1	21	NO INFO
Pure Vida Joint- C22	19.65	NO INFO														Lemon Diesel- C1	21	NO INFO
501st OG- C36	19.7	NO INFO														Death Star- C24	21	NO INFO
Pineapple Express- C3	19.8	NO INFO														Mandarin Cookies- C24	21	NO INFO
Fool's Gold- C19	19.8	NO INFO														Strawberry Lemonade- C32	21	NO INFO
Suno Pre-roll- C23	19.8	NO INFO														Maui- C32	21	NO INFO
Durban Poison- C38	19.8	NO INFO														Durban Poison- C13a	21.07	0
Raskal OG- C13a	19.88	0														Durban Poison- C13b	21.07	0
Raskal OG- C13b	19.88	0														Tangerine Dream- C23	21.1	NO INFO
Axilla- C32	20	NO INFO														Girl Scout Cookie- C31	21.1	NO INFO
Jillybean- C32	20	NO INFO														Maui- C4a	21.11	0
Nookie #1- C32	20	NO INFO														Maui- C4b	21.11	0
Southern Charm- C32	20	NO INFO														Maui- C4c	21.11	0
Chemodo Kush- C36	20	NO INFO														Granddaddy Purps- C23	21.2	NO INFO
White Widow- C36	20	NO INFO														Golden Goat- C13a	21.22	0.56
Mob Boss - C11	20.06	NO INFO														Golden Goat- C13b	21.22	0.56
Grunk- C13a	20.12	0														Blue Dream- C4a	21.23	0
Grunk- C13b	20.12	0														Blue Dream- C4b	21.23	0
Jenny Kush- C30	20.135	NO INFO														Blue Dream- C4c	21.23	0
East Coast Sour Diesel- C37b	20.14	NO INFO														Ogre Kush (Willie's Reserve)- C24	21.24	NO INFO
Leeroy- C5	20.2	NO INFO														Critical Kush- C36	21.25	NO INFO
Pan - C11	20.2	NO INFO														Do-Si-Dos- C38	21.25	NO INFO
Poseidon OG (Pre-roll)- C5	20.22	NO INFO														Maui Waui- C19	21.3	NO INFO
Sweet Sweet- Flower- BWC- C22	20.26	1.32														Rockstar Kush- C19	21.3	NO INFO
Sweet Sweet Joint- C22	20.26	0														OG Kush- C3	21.33	NO INFO
Sour Diesel- C11	20.27	NO INFO														Blue Harley- C19	21.4	NO INFO
Light of Jah- C4a	20.3	0														Berkel- C3	21.44	NO INFO
Light of Jah- C4b	20.3	0														Tres Star- C36	21.45	No INFO
Light of Jah- C4c	20.3	0														G.S.C. (thin mint cut)- C1	21.5	NO INFO
Shaw Bud- C37b	20.3	NO INFO														Carpe Diem (Pre-roll)- C5	21.59	NO INFO
Chocolate Bomb Joint- C22	20.42	NO INFO														Platinum Girl Scout Cookies- C13a	21.6	0
Blue Dream- C29	20.5	NO INFO														Platinum Girl Scout Cookies- C13b	21.6	0
303 OG- C13a	20.52	0														Girl Scount Cookies- C19	21.6	NO INFO
303 OG- C13b	20.52	0														Sour Kush- C36	21.62	NO INFO
Ghost OG- C30	20.535	NO INFO														Lavendar Jones- C4a	21.67	0
Trainwreck- C13a	20.58	0														Lavendar Jones- C4	21.67	0
Trainwreck- C13b	20.58	0														Lavendar Jones- C4c	21.67	0
Hemlock- C1	20.6	NO INFO														Smurfette- C5	21.69	NO INFO
Bubble Jack- C24	20.635	NO INFO														Colin OG (Willie's Reserve)- C24	21.7	NO INFO
OG Kush- C11	20.67	NO INFO														Mob Boss - C1	21.75	NO INFO
Purple Trainwreck- C23	20.7	NO INFO														Sour Sunset- C1	21.8	NO INFO
Key Lime Pie- C13a	20.75	0.6														Biochem- C3	21.8	NO INFO
Key Lime Pie- C13b	20.75	0.6														Strawberry Lemonade- C4a	21.85	NO INFO
Sour Banana Sherbert- C1	20.8	NO INFO														Strawberry Lemonade- C4b	21.85	NO INFO
Purple Kush- C24	20.82	NO INFO														Strawberry Lemonade- C4c	21.85	NO INFO
Cypress OG- C13a	20.84	0														Blue Dream- C24	21.9	NO INFO
Cypress OG- C13b	20.84	0														Ghost OG- C13a	21.96	0
Ice Cream- C6	20.86	0														Ghost OG- C13b	21.96	0
Skywalker OG- C13a	20.87	0														Big Smooth- C24	21.975	NO INFO
Skywalker OG- C13b	20.87	0														Mandarin OG- C4a	22	0
Chem Dawg (Pre-roll)- C5	20.9	NO INFO														Alien OG- C14	22	NO INFO
Blue Dream- C19	20.9	NO INFO														Mandarin OG- C4b	22	0
White Widow #47- C19	20.9	NO INFO														Mandarin OG- C4c	22	0
White Harley- C19	20.9	NO INFO														Cherry Lime Haze- C26a	22	NO INFO
Light Of Jah- C36	20.9	NO INFO														Cherry Lime Haze- C26b	22	NO INFO
Alaskan Sweet Skunk- C1	21	NO INFO														Red Headed Stranger- C38	22	NO INFO
Lemon Diesel- C1	21	NO INFO														Sugar Cookies - C14	22.05	0
Death Star- C24	21	NO INFO														Moonshine Haze- C24	22.05	NO INFO
Mandarin Cookies- C24	21	NO INFO														Kandy Kush- C23	22.1	NO INFO
Strawberry Lemonade- C32	21	NO INFO														Purple Dog Bud- C38	22.1	NO INFO
Maui- C32	21	NO INFO														Double Tahoe- C11	22.14	NO INFO
Durban Poison- C13a	21.07	0														Chem Dawg- C6	22.16	0
Durban Poison- C13b	21.07	0														Cali-O- C3	22.2	NO INFO
Tangerine Dream- C23	21.1	NO INFO														Candy Kush- C19	22.2	NO INFO
Girl Scout Cookie- C31	21.1	NO INFO														Louvre (Pre-roll)- C5	22.21	NO INFO
Maui- C4a	21.11	0														Stardawg- C36	22.25	NO INFO
Maui- C4b	21.11	0														Queen of Sheba (Pre-roll)- C5	22.28	NO INFO
Maui- C4c	21.11	0														G.G. Joint- C22	22.3	NO INFO
Granddaddy Purps- C23	21.2	NO INFO														Clementine/Wedding/Gelato- C31	22.3	NO INFO
Golden Goat- C13a	21.22	0.56														NYC Diesel (Pre-roll)- C5	22.35	NO INFO
Golden Goat- C13b	21.22	0.56														GG4- C14	22.38	0
Blue Dream- C4a	21.23	0														Pink Bubblegum Romunlan- C4a	22.49	0
Blue Dream- C4b	21.23	0														Pink Bubblegum Romunlan- C4b	22.49	0
Blue Dream- C4c	21.23	0														Pink Bubblegum Romunlan- C4c	22.49	0
Ogre Kush (Willie's Reserve)- C24	21.24	NO INFO														Jedi Kush- C1	22.5	NO INFO
Critical Kush- C36	21.25	NO INFO														Critical Lights- C19	22.5	No INFO
Do-Si-Dos- C38	21.25	NO INFO														Golden Goat- C29	22.5	NO INFO
Maui Waui- C19	21.3	NO INFO														Bear Dance- C29	22.5	NO INFO
Rockstar Kush- C19	21.3	NO INFO														Chemdawg- C36	22.5	NO INFO
OG Kush- C3	21.33	NO INFO														92 OG- C13a	22.52	0
Blue Harley- C19	21.4	NO INFO														92 OG- C13b	22.52	0
Berkel- C3	21.44	NO INFO														Skywalker OG- C11	22.53	NO INFO
Tres Star- C36	21.45	No INFO														G6- C37b	22.59	NO INFO
G.S.C. (thin mint cut)- C1	21.5	NO INFO														King Chem- C19	22.6	NO INFO
Carpe Diem (Pre-roll)- C5	21.59	NO INFO														Kosher Kush- C13a	22.62	0
Platinum Girl Scout Cookies- C13a	21.6	0														Kosher Kush- C13b	22.62	0
Platinum Girl Scout Cookies- C13b	21.6	0														Bruce Banner- C11	22.65	NO INFO
Girl Scount Cookies- C19	21.6	NO INFO														Durban Diesel- C30	22.66	NO INFO
Sour Kush- C36	21.62	NO INFO														Glass Apple- C4a	22.67	0
Lavendar Jones- C4a	21.67	0														Glass Apple- C4b	22.67	0
Lavendar Jones- C4	21.67	0														Glass Apple- C4c	22.67	0
Lavendar Jones- C4c	21.67	0														Iced Grapefruit- C24	22.67	NO INFO
Smurfette- C5	21.69	NO INFO														Carribbean Cooler- C38	22.68	NO INFO
Colin OG (Willie's Reserve)- C24	21.7	NO INFO														Headband- C1	22.7	NO INFO
Mob Boss - C1	21.75	NO INFO														Heavenly Haze- C6	22.7	0
Sour Sunset- C1	21.8	NO INFO														Jack Fire- C38	22.7	NO INFO
Biochem- C3	21.8	NO INFO														Black Fire- C24	22.705	NO INFO
Strawberry Lemonade- C4a	21.85	NO INFO														Blue Dream- C3	22.8	NO INFO
Strawberry Lemonade- C4b	21.85	NO INFO														Sour Head- C6	22.8	0
Strawberry Lemonade- C4c	21.85	NO INFO														Bubba Kush- C13a	22.81	0
Blue Dream- C24	21.9	NO INFO														Bubba Kush- C13b	22.81	0
Ghost OG- C13a	21.96	0														Sensi Star- C24	22.87	NO INFO
Ghost OG- C13b	21.96	0														Golden Goat- C4a	22.98	0
Big Smooth- C24	21.975	NO INFO														Golden Goat- C4b	22.98	0
Mandarin OG- C4a	22	0														Golden Goat- C4c	22.98	0
Alien OG- C14	22	NO INFO														Grape Ape- C21	23	0
Mandarin OG- C4b	22	0														Larr OG- C29	23	NO INFO
Mandarin OG- C4c	22	0														Lemon Cap- C27b	23	0
Cherry Lime Haze- C26a	22	NO INFO														Nerds- C27b	23	NO INFO
Cherry Lime Haze- C26b	22	NO INFO														Jack Flash- C32	23	NO INFO
Red Headed Stranger- C38	22	NO INFO														Blue Dream- C36	23	NO INFO
Sugar Cookies - C14	22.05	0														Afghan Kush- C38	23	NO INFO
Moonshine Haze- C24	22.05	NO INFO														Chem Dawg #4- C38	23	NO INFO
Kandy Kush- C23	22.1	NO INFO														Sour Diesel- C13a	23.07	0
Purple Dog Bud- C38	22.1	NO INFO														Sour Diesel- C13b	23.07	0
Double Tahoe- C11	22.14	NO INFO														King Kong- C38	23.2	NO INFO
Chem Dawg- C6	22.16	0														Sour OG- C1	23.25	NO INFO
Cali-O- C3	22.2	NO INFO														Long's Peak Blue- C6	23.3	0
Candy Kush- C19	22.2	NO INFO														Sour Diesel- C24	23.32	NO INFO
Louvre (Pre-roll)- C5	22.21	NO INFO														Daytime (Pre-roll)- C5	23.37	NO INFO
Stardawg- C36	22.25	NO INFO														Citrus Berry- C24	23.37	NO INFO
Queen of Sheba (Pre-roll)- C5	22.28	NO INFO														Ghost OG- C22	23.4	NO INFO
G.G. Joint- C22	22.3	NO INFO														Bubba Kush- C5	23.47	NO INFO
Clementine/Wedding/Gelato- C31	22.3	NO INFO														Holy Grail Kush- C29	23.5	4
NYC Diesel (Pre-roll)- C5	22.35	NO INFO														Jaeger- C19	23.6	No INFO
GG4- C14	22.38	0														Bubba Kush- C19	23.6	NO INFO
Pink Bubblegum Romunlan- C4a	22.49	0														Chupacabra- C14	23.68	2.1
Pink Bubblegum Romunlan- C4b	22.49	0														Purple Punch- C31	23.7	NO INFO
Pink Bubblegum Romunlan- C4c	22.49	0														Wedding Cake- C38	23.7	NO INFO
Jedi Kush- C1	22.5	NO INFO														Jack's Pie- C14	23.77	0
Critical Lights- C19	22.5	No INFO														Sour Diesel- C30	23.8	NO INFO
Golden Goat- C29	22.5	NO INFO														Mob Boss- C5	23.87	NO INFO
Bear Dance- C29	22.5	NO INFO														Screaming Tangerine- C14	23.92	0
Chemdawg- C36	22.5	NO INFO														Golden Goat- C24	23.945	1.07
92 OG- C13a	22.52	0														Strawberry Banana- C13a	23.99	0.78
92 OG- C13b	22.52	0														Strawberry Banana- C13b	23.99	0.78
Skywalker OG- C11	22.53	NO INFO														Blue Dream- C23	24	NO INFO
G6- C37b	22.59	NO INFO														Mob Boss- C23	24	NO INFO
King Chem- C19	22.6	NO INFO														Mob Boss Pre-roll- C23	24	NO INFO
Kosher Kush- C13a	22.62	0														Ogre Kush- C24	24	NO INFO
Kosher Kush- C13b	22.62	0														Sour OG- Shake- C24	24	NO INFO
Bruce Banner- C11	22.65	NO INFO														Chem #4- C38	24	NO INFO
Durban Diesel- C30	22.66	NO INFO														Temple Kush (Willie's Reserve)- C24	24.01	NO INFO
Glass Apple- C4a	22.67	0														Golden Goat- C19	24.1	NO INFO
Glass Apple- C4b	22.67	0														GG4- C38	24.11	NO INFO
Glass Apple- C4c	22.67	0														Julius Caesar- C14	24.16	NO INFO
Iced Grapefruit- C24	22.67	NO INFO														Cornbread- C19	24.2	NO INFO
Carribbean Cooler- C38	22.68	NO INFO														SAGE- C13a	24.26	0
Headband- C1	22.7	NO INFO														SAGE- C13b	24.26	0
Heavenly Haze- C6	22.7	0														Stardawg- C14	24.28	0
Jack Fire- C38	22.7	NO INFO														Super Lemon Haze (Wilie's Reserve)- C24	24.3	NO INFO
Black Fire- C24	22.705	NO INFO														Nighttime (Pre-roll)- C5	24.35	NO INFO
Blue Dream- C3	22.8	NO INFO														Mako Haze - C11	24.37	NO INFO
Sour Head- C6	22.8	0														Lucy- C19	24.4	No INFO
Bubba Kush- C13a	22.81	0														Tahoe OG- C24	24.41	NO INFO
Bubba Kush- C13b	22.81	0														Sour Diesel- C4a	24.42	0
Sensi Star- C24	22.87	NO INFO														Sour Diesel- C4b	24.42	0
Golden Goat- C4a	22.98	0														Sour Diesel- C4c	24.42	0
Golden Goat- C4b	22.98	0														Alien Dawg- C11	24.45	NO INFO
Golden Goat- C4c	22.98	0														Sherbert- C14	24.49	0
Grape Ape- C21	23	0														Odysseus OG (Pre-roll)- C5	24.5	NO INFO
Larr OG- C29	23	NO INFO														Chem 4- C29	24.5	NO INFO
Lemon Cap- C27b	23	0														Bruce Banner- C5	24.63	NO INFO
Nerds- C27b	23	NO INFO														Gorilla Glue- C23	24.78	27.93
Jack Flash- C32	23	NO INFO														Glass Slipper- C1	24.8	NO INFO
Blue Dream- C36	23	NO INFO														Gorilla Glue #4- C19	24.8	NO INFO
Afghan Kush- C38	23	NO INFO														Skunk- C23	24.8	NO INFO
Chem Dawg #4- C38	23	NO INFO														Snowcap- C24	24.8	NO INFO
Sour Diesel- C13a	23.07	0														Lemon Skunk- C3	24.87	NO INFO
Sour Diesel- C13b	23.07	0														Stardawg Guava- C13a	24.93	0.52
King Kong- C38	23.2	NO INFO														Stardawg Guava- C13b	24.93	0.52
Sour OG- C1	23.25	NO INFO														Afghooey- C11	25	NO INFO
Long's Peak Blue- C6	23.3	0														Grape Jar- C19	25	No INFO
Sour Diesel- C24	23.32	NO INFO														Kosher Kush- C27b	25	0.71
Daytime (Pre-roll)- C5	23.37	NO INFO														Cornbread- C32	25	NO INFO
Citrus Berry- C24	23.37	NO INFO														X-wing- C13a	25.02	0
Ghost OG- C22	23.4	NO INFO														X-wing- C13b	25.02	0
Bubba Kush- C5	23.47	NO INFO														Sugar Cookies- C14	25.11	NO INFO
Holy Grail Kush- C29	23.5	4														Trainwreck- C4a	25.16	0
Jaeger- C19	23.6	No INFO														Trainwreck- C4b	25.16	0
Bubba Kush- C19	23.6	NO INFO														Trainwreck- C4c	25.16	0
Chupacabra- C14	23.68	2.1														Bruce Banner- C26a	25.4	NO INFO
Purple Punch- C31	23.7	NO INFO														Bruce Banner- C26b	25.4	NO INFO
Wedding Cake- C38	23.7	NO INFO														Sour Joker- C29	25.5	NO INFO
Jack's Pie- C14	23.77	0														Ghost OG- C29	25.5	NO INFO
Sour Diesel- C30	23.8	NO INFO														Skunkberry- C29	25.5	NO INFO
Mob Boss- C5	23.87	NO INFO														Girl Scout Cookies- C29	25.5	NO INFO
Screaming Tangerine- C14	23.92	0														Fire Down Bilo- C36	25.5	NO INFO
Golden Goat- C24	23.945	1.07														Chem 91- C37b	25.55	NO INFO
Strawberry Banana- C13a	23.99	0.78														Silver and Gold- C3	25.6	NO INFO
Strawberry Banana- C13b	23.99	0.78														Devil's Fire- C24	25.62	NO INFO
Blue Dream- C23	24	NO INFO														Chem Dawg- C23	25.7	NO INFO
Mob Boss- C23	24	NO INFO														BioChem- C38	25.7	NO INFO
Mob Boss Pre-roll- C23	24	NO INFO														Cough Ghost- C6	25.75	0
Ogre Kush- C24	24	NO INFO														The white x Cindy 99 (Pre-roll)- C5	25.9	NO INFO
Sour OG- Shake- C24	24	NO INFO														Conspiracy- C38	25.9	NO INFO
Chem #4- C38	24	NO INFO														Dankey Kong- C26a	26	NO INFO
Temple Kush (Willie's Reserve)- C24	24.01	NO INFO														Ecto-Cooler Cannabis- C29	26	NO INFO
Golden Goat- C19	24.1	NO INFO														Ghost of Leeroy- C29	26	NO INFO
GG4- C38	24.11	NO INFO														Dutch Treat Haze- C27b	26	1
Julius Caesar- C14	24.16	NO INFO														Snowcap- C27b	26	0.63
Cornbread- C19	24.2	NO INFO														Golden Goat- C32	26	NO INFO
SAGE- C13a	24.26	0														Dankey Kong- C26b	26	NO INFO
SAGE- C13b	24.26	0														Rockstar Kush- C38	26	NO INFO
Stardawg- C14	24.28	0														Chem Dawg X- C38	26	NO INFO
Super Lemon Haze (Wilie's Reserve)- C24	24.3	NO INFO														Green Crack- C21	26.1	0
Nighttime (Pre-roll)- C5	24.35	NO INFO														Mothers Milk- C4a	26.14	0
Mako Haze - C11	24.37	NO INFO														Mothers Milk- C4b	26.14	0
Lucy- C19	24.4	No INFO														Mothers Milk- C4c	26.14	0
Tahoe OG- C24	24.41	NO INFO														Pipe Dream- C24	26.19	NO INFO
Sour Diesel- C4a	24.42	0														Island Sweet Skunk- C26a	26.2	NO INFO
Sour Diesel- C4b	24.42	0														Island Sweet Skunk- C26b	26.2	NO INFO
Sour Diesel- C4c	24.42	0														Mob Boss- C5	26.29	NO INFO
Alien Dawg- C11	24.45	NO INFO														Lemon Diesel- C38	26.3	NO INFO
Sherbert- C14	24.49	0														Sunset Sherbert- C14	26.49	0
Odysseus OG (Pre-roll)- C5	24.5	NO INFO														Lucinda Williams- C29	26.5	NO INFO
Chem 4- C29	24.5	NO INFO														Triangle Kush- C29	26.5	NO INFO
Bruce Banner- C5	24.63	NO INFO														Gorilla Glue #4- C29	26.5	NO INFO
Gorilla Glue- C23	24.78	27.93														Walter White- C24	26.54	No INFO
Glass Slipper- C1	24.8	NO INFO														Tahoe OG- C5	26.63	NO INFO
Gorilla Glue #4- C19	24.8	NO INFO														Screaming Gorilla- C37b	26.66	NO INFO
Skunk- C23	24.8	NO INFO														Bruce Banner #3- C4a	26.72	0
Snowcap- C24	24.8	NO INFO														Bruce Banner #3- C4b	26.72	0
Lemon Skunk- C3	24.87	NO INFO														Bruce Banner #3- C4c	26.72	0
Stardawg Guava- C13a	24.93	0.52														White 99- C4a	26.8	NO INFO
Stardawg Guava- C13b	24.93	0.52														White 99- C4b	26.8	NO INFO
Afghooey- C11	25	NO INFO														White 99- C4c	26.8	NO INFO
Grape Jar- C19	25	No INFO														Bubba Kush- C5	26.89	NO INFO
Kosher Kush- C27b	25	0.71														Ghost Train Haze- C38	26.9	NO INFO
Cornbread- C32	25	NO INFO														Chem Dawg- C5	26.93	NO INFO
X-wing- C13a	25.02	0														G13- C11	27	NO INFO
X-wing- C13b	25.02	0														Super Lemon Haze- C26a	27	NO INFO
Sugar Cookies- C14	25.11	NO INFO														Cotton Kandy Kush- C27b	27	1
Trainwreck- C4a	25.16	0														OG Kush- C27b	27	NO INFO
Trainwreck- C4b	25.16	0														Super Lemon Haze- C26b	27	NO INFO
Trainwreck- C4c	25.16	0														East Coast Sour Diesel- C4a	27.15	0
Bruce Banner- C26a	25.4	NO INFO														East Coast Sour Diesel- C4b	27.15	0
Bruce Banner- C26b	25.4	NO INFO														East Coast Sour Diesel- C4c	27.15	0
Sour Joker- C29	25.5	NO INFO														Ghost OG- C23	27.2	NO INFO
Ghost OG- C29	25.5	NO INFO														Sour Diesel (Willie's Reserve)- C24	27.3	NO INFO
Skunkberry- C29	25.5	NO INFO														Tiger's Milk- C29	27.5	NO INFO
Girl Scout Cookies- C29	25.5	NO INFO														Karma- C11	27.53	NO INFO
Fire Down Bilo- C36	25.5	NO INFO														Camband- C37b	27.65	NO INFO
Chem 91- C37b	25.55	NO INFO														K Kush- C5	27.74	NO INFO
Silver and Gold- C3	25.6	NO INFO														Ray Charles (Willie's Reserve)- C24	27.9	NO INFO
Devil's Fire- C24	25.62	NO INFO														Jack Herer- C38	27.9	NO INFO
Chem Dawg- C23	25.7	NO INFO														Red Heded Stranger- C26a	27.97	NO INFO
BioChem- C38	25.7	NO INFO														Red Heded Stranger- C26b	27.97	NO INFO
Cough Ghost- C6	25.75	0														Pura Vida- C29	28	NO INFO
The white x Cindy 99 (Pre-roll)- C5	25.9	NO INFO														Cheese Quake- C38	28	NO INFO
Conspiracy- C38	25.9	NO INFO														Cherry Lime Haze- C38	28	NO INFO
Dankey Kong- C26a	26	NO INFO														Cotton Candy Kush- C26a	28.01	NO INFO
Ecto-Cooler Cannabis- C29	26	NO INFO														Cotton Candy Kush- C26b	28.01	NO INFO
Ghost of Leeroy- C29	26	NO INFO														Aspen OG- C24	28.46	NO INFO
Dutch Treat Haze- C27b	26	1														Kandy Kush- C29	28.5	NO INFO
Snowcap- C27b	26	0.63														Lee Roy TK #5- C29	28.5	NO INFO
Golden Goat- C32	26	NO INFO														Louis XIII- C29	28.5	NO INFO
Dankey Kong- C26b	26	NO INFO														Tahoe OG Kush- C29	28.5	NO INFO
Rockstar Kush- C38	26	NO INFO														Cookies n Cream- C29	28.5	NO INFO
Chem Dawg X- C38	26	NO INFO														Emerald OG- C37b	28.66	NO INFO
Green Crack- C21	26.1	0														Jedi Biker- C19	28.7	No INFO
Mothers Milk- C4a	26.14	0														Moby Dick - C11	28.88	NO INFO
Mothers Milk- C4b	26.14	0														GG #4 (Pre-roll)- C5	29	NO INFO
Mothers Milk- C4c	26.14	0														Tang Haze Joint- C22	29.3	NO INFO
Pipe Dream- C24	26.19	NO INFO														Magik- C38	29.4	NO INFO
Island Sweet Skunk- C26a	26.2	NO INFO														Cherry Diesel- C23	29.5	NO INFO
Island Sweet Skunk- C26b	26.2	NO INFO														White Fire OG Flower- C29	29.5	NO INFO
Mob Boss- C5	26.29	NO INFO														Chem4- C31	29.5	1.2
Lemon Diesel- C38	26.3	NO INFO														Chem Sour- C38	29.6	NO INFO
Sunset Sherbert- C14	26.49	0														White Fire OG- C4a	29.68	0
Lucinda Williams- C29	26.5	NO INFO														White Fire OG- C4b	29.68	0
Triangle Kush- C29	26.5	NO INFO														White Fire OG- C4c	29.68	0
Gorilla Glue #4- C29	26.5	NO INFO														F-18 OG- C24	29.705	NO INFO
Walter White- C24	26.54	No INFO														303 Lemons- C14	29.79	0
Tahoe OG- C5	26.63	NO INFO														Grimace- C5	29.8	NO INFO
Screaming Gorilla- C37b	26.66	NO INFO														Diagonal- C38	29.9	NO INFO
Bruce Banner #3- C4a	26.72	0														Sueno- C26a	30	NO INFO
Bruce Banner #3- C4b	26.72	0														Sueno- C26b	30	NO INFO
Bruce Banner #3- C4c	26.72	0														GSC- C38	30	NO INFO
White 99- C4a	26.8	NO INFO														Acid- C38	30.6	NO INFO
White 99- C4b	26.8	NO INFO														Krome's the White- C24	30.7	NO INFO
White 99- C4c	26.8	NO INFO														Blue Caddy- C31	30.8	1.5
Bubba Kush- C5	26.89	NO INFO														Black Berry Banana Kush- C38	30.9	NO INFO
Ghost Train Haze- C38	26.9	NO INFO														Medicine Man- C26a	31	NO INFO
Chem Dawg- C5	26.93	NO INFO														Skywalker OG 600- C26a	31	NO INFO
G13- C11	27	NO INFO														Pura Vida- C26a	31	NO INFO
Super Lemon Haze- C26a	27	NO INFO														OG Sin - C26a	31	NO INFO
Cotton Kandy Kush- C27b	27	1														Sour Patch Kiss- C26a	31	NO INFO
OG Kush- C27b	27	NO INFO														Medicine Man- C26b	31	NO INFO
Super Lemon Haze- C26b	27	NO INFO														Skywalker OG 600- C26b	31	NO INFO
East Coast Sour Diesel- C4a	27.15	0														Pura Vida- C26b	31	NO INFO
East Coast Sour Diesel- C4b	27.15	0														OG Sin - C26b	31	NO INFO
East Coast Sour Diesel- C4c	27.15	0														Sour Patch Kiss- C26b	31	NO INFO
Ghost OG- C23	27.2	NO INFO														OG Chem- C37b	31.9	NO INFO
Sour Diesel (Willie's Reserve)- C24	27.3	NO INFO														ARC- C29	32.5	NO INFO
Tiger's Milk- C29	27.5	NO INFO														Hybrid (Pre-roll)- C5	33	NO INFO
Karma- C11	27.53	NO INFO														Cherry Mongrel- C38	33.86	NO INFO
Camband- C37b	27.65	NO INFO														Purple Rockstar Kush- C26a	34	NO INFO
K Kush- C5	27.74	NO INFO														Purple Rockstar Kush- C26b	34	NO INFO
Ray Charles (Willie's Reserve)- C24	27.9	NO INFO														GG4- C38	34.3	NO INFO
Jack Herer- C38	27.9	NO INFO														King Tut OG- C26a	34.85	NO INFO
Red Heded Stranger- C26a	27.97	NO INFO														King Tut OG- C26b	34.85	NO INFO
Red Heded Stranger- C26b	27.97	NO INFO														Chemmy Jones- C26a	39.5	NO INFO
Pura Vida- C29	28	NO INFO														Chemmy Jones- C26b	39.5	NO INFO
Cheese Quake- C38	28	NO INFO														NYC Diesel- C30	40.29	NO INFO
Cherry Lime Haze- C38	28	NO INFO
Cotton Candy Kush- C26a	28.01	NO INFO
Cotton Candy Kush- C26b	28.01	NO INFO
Aspen OG- C24	28.46	NO INFO
Kandy Kush- C29	28.5	NO INFO
Lee Roy TK #5- C29	28.5	NO INFO
Louis XIII- C29	28.5	NO INFO
Tahoe OG Kush- C29	28.5	NO INFO
Cookies n Cream- C29	28.5	NO INFO
Emerald OG- C37b	28.66	NO INFO
Jedi Biker- C19	28.7	No INFO
Moby Dick - C11	28.88	NO INFO
GG #4 (Pre-roll)- C5	29	NO INFO
Tang Haze Joint- C22	29.3	NO INFO
Magik- C38	29.4	NO INFO
Cherry Diesel- C23	29.5	NO INFO
White Fire OG Flower- C29	29.5	NO INFO
Chem4- C31	29.5	1.2
Chem Sour- C38	29.6	NO INFO
White Fire OG- C4a	29.68	0
White Fire OG- C4b	29.68	0
White Fire OG- C4c	29.68	0
F-18 OG- C24	29.705	NO INFO
303 Lemons- C14	29.79	0
Grimace- C5	29.8	NO INFO
Diagonal- C38	29.9	NO INFO
Sueno- C26a	30	NO INFO
Sueno- C26b	30	NO INFO
GSC- C38	30	NO INFO
Acid- C38	30.6	NO INFO
Krome's the White- C24	30.7	NO INFO
Blue Caddy- C31	30.8	1.5
Black Berry Banana Kush- C38	30.9	NO INFO
Medicine Man- C26a	31	NO INFO
Skywalker OG 600- C26a	31	NO INFO
Pura Vida- C26a	31	NO INFO
OG Sin - C26a	31	NO INFO
Sour Patch Kiss- C26a	31	NO INFO
Medicine Man- C26b	31	NO INFO
Skywalker OG 600- C26b	31	NO INFO
Pura Vida- C26b	31	NO INFO
OG Sin - C26b	31	NO INFO
Sour Patch Kiss- C26b	31	NO INFO
OG Chem- C37b	31.9	NO INFO
ARC- C29	32.5	NO INFO
Hybrid (Pre-roll)- C5	33	NO INFO
Cherry Mongrel- C38	33.86	NO INFO
Purple Rockstar Kush- C26a	34	NO INFO
Purple Rockstar Kush- C26b	34	NO INFO
GG4- C38	34.3	NO INFO
King Tut OG- C26a	34.85	NO INFO
King Tut OG- C26b	34.85	NO INFO
Chemmy Jones- C26a	39.5	NO INFO
Chemmy Jones- C26b	39.5	NO INFO
NYC Diesel- C30	40.29	NO INFO
AVG	21.3665	1.7177			2.535	14.824			6.98682	10.0505			13.3128	3.27308			22.6865	0.330909
SD	5.80037	4.29069			1.47883	4.34974			1.5102	2.91478			1.50782	5.17388			4.26684	2.14477
N	545	213			6	5			22	19			27	13			490	176

## Sheet: Colorado- Rec
Strain	THC	CBD		Strain < 5%	THC	CBD		Strain 5 - 10% THC	THC	CBD		Strain 10-15% THC	THC	CBD		Strain > 16% THC	THC	CBD
Juanita Lagrimoso- C1	0.7	15.1		Juanita Lagrimoso- C1	0.7	15.1		Harlequin- C34	5.015	8.85		The Wife- C21	10.16	17.59		Verde Bubble Jack Flower- C35	15.3	No INFO
Mystery 98 #1- C34	0.785	14.51		Mystery 98 #1- C34	0.785	14.51		Charlotte's Web- C2	5.02	5.31		UpgraDDe- C36	10.5	NO INFO		Maui Wowie- C17	15.4	NO INFO
Cherry Mender- C20	1	15		Cherry Mender- C20	1	15		Harlequin- C4a	5.02	7.8		Agent Orange- C6	10.57	0		Headband- C1	15.5	NO INFO
Grape Stomper- C21	1.18	13.25		Grape Stomper- C21	1.18	13.25		Harlequin- C4b	5.02	7.8		Flo- C10	12	NO INFO		Blue Dream X GSC- C28	15.56	NO INFO
Flaming Cookies- C20	2	NO INFO		Flaming Cookies- C20	2	NO INFO		Harlequin- C4c	5.02	7.8		Incredible Power- C27a	12	12		Lavendar Kush- C1	15.6	NO INFO
Specturm #12 Cannabis- C29	2.4	22		Specturm #12 Cannabis- C29	2.4	22		Charlotte's Web- C2	5.02	5.31		Med Man Kush- C37b	12.51	NO INFO		Shere Kahn- C37a	15.6	NO INFO
Gold 4:1 CBD/THC (Pre-roll)- C5	2.86	12.18		Gold 4:1 CBD/THC (Pre-roll)- C5	2.86	12.18		Canna Tsu- C37a	5.77	8.83		Black Lime Reserve- C18	12.89	NO INFO		Shere Khan - C37b	15.6	NO INFO
CBD Therapy- C19	4.1	NO INFO		CBD Therapy- C19	4.1	NO INFO		Canna TSU- C37b	5.77	8.83		Candyland- C1	13	NO INFO		Verde Black Mamba Flower- C35	15.7	NO INFO
Bright Tora Bora- C12	4.9	13.38		Bright Tora Bora- C12	4.9	13.38		Snowpack- C5	6.42	13.2		Animal Cookies- C10	13	NO INFO		Raz and Relaxation- C17	15.9	11.3
Harlequin- C34	5.015	8.85						High CBD/Low THC (Pre-roll)- C5	6.9	12.13		Fire Dream- C28	13.4	NO INFO		Starkiller- C17	15.9	NO INFO
Charlotte's Web- C2	5.02	5.31						High CBD/Low THC (Pre-roll)- C5	6.9	12.14		Burmese Kush- C10	14	NO INFO		Mountain Thunder- C20	16	NO INFO
Harlequin- C4a	5.02	7.8						Harlequin #5 CBD- C1	7	11.7		SFV OG Kush- C37b	14.4	NO INFO		Banana Kush- C28	16	NO INFO
Harlequin- C4b	5.02	7.8						Iron Triangle- C36	7.2	NO INFO		Blurple- C15	14.6	0.06		Pie- C12	16.05	0.04
Harlequin- C4c	5.02	7.8						Bubonic Chronic- C14	7.6	9.8		Orange Herijuana- C4a	14.67	0		Purple OG- C30	16.165	NO INFO
Charlotte's Web- C2	5.02	5.31						Mango Haze- C1	7.7	12.4		Orange Herijuana- C4c	14.67	0		Northern Lights- C15	16.4	0
Canna Tsu- C37a	5.77	8.83						Blue Widow- C28	8	NO INFO		Orange Herijuana- C4b	14.67	0		Gelato- C13a	16.44	0.59
Canna TSU- C37b	5.77	8.83						Jedi Kush- C17	8.1	11		Apple Bubba- C12	14.9	0.04		Gelato- C13b	16.44	0.59
Snowpack- C5	6.42	13.2						Pre 98 Bubba- C13a	8.82	15.63		Soma Bear Dance Flower- C35	14.9	NO INFO		Blackberry x Blueberry- C15	16.5	0
High CBD/Low THC (Pre-roll)- C5	6.9	12.13						Pre 98 Bubba Kush- C11	8.87	13.22		Blackberry Kush- C1	15	NO INFO		Lemon Skunk- C32	16.5	NO INFO
High CBD/Low THC (Pre-roll)- C5	6.9	12.14						Blue Widow- C28	10	NO INFO		Armageddon- C10	15	NO INFO		Night Nurse- C33	16.5	0
Harlequin #5 CBD- C1	7	11.7														Jack Flash- C13a	16.51	0
Iron Triangle- C36	7.2	NO INFO														Jack Flash- C13b	16.51	0
Bubonic Chronic- C14	7.6	9.8														Super Lemon Haze- C13a	16.54	0
Mango Haze- C1	7.7	12.4														Super Lemon Haze- C13b	16.54	0
Blue Widow- C28	8	NO INFO														Master Kush- C15	16.59	0
Jedi Kush- C17	8.1	11														Green Crack- C1	16.6	NO INFO
Pre 98 Bubba- C13a	8.82	15.63														Black Gorilla (Pre-roll)- C5	16.66	NO INFO
Pre 98 Bubba Kush- C11	8.87	13.22														Trill OG- C15	16.68	0.06
Blue Widow- C28	10	NO INFO														303 Kush- C15	16.69	0.06
The Wife- C21	10.16	17.59														Sour Patch Cookies (Pre-roll)- C5	16.78	NO INFO
UpgraDDe- C36	10.5	NO INFO														Lifesaver- C4a	16.91	0
Agent Orange- C6	10.57	0														Lifesaver- C4b	16.91	0
Flo- C10	12	NO INFO														Lifesaver- C4c	16.91	0
Incredible Power- C27a	12	12														Cinex- C12	16.96	0.04
Med Man Kush- C37b	12.51	NO INFO														Ogre Kush #2- C7	17	0
Black Lime Reserve- C18	12.89	NO INFO														Mimosa- C27a	17	0.25
Candyland- C1	13	NO INFO														Super Lemon Haze- C27a	17	NO INFO
Animal Cookies- C10	13	NO INFO														Chupacabra- C11	17.01	NO INFO
Fire Dream- C28	13.4	NO INFO														Phishhead Kush- C13a	17.03	0
Burmese Kush- C10	14	NO INFO														Phishhead Kush- C13b	17.03	0
SFV OG Kush- C37b	14.4	NO INFO														Verde Super Lemon Haze Flower- C35	17.1	NO INFO
Blurple- C15	14.6	0.06														Alley Cat Kush- C13a	17.11	0
Orange Herijuana- C4a	14.67	0														Alley Cat Kush- C13b	17.11	0
Orange Herijuana- C4c	14.67	0														Panama Punch- C13a	17.18	0
Orange Herijuana- C4b	14.67	0														Panama Punch- C13b	17.18	0
Apple Bubba- C12	14.9	0.04														THC Bomb - C37b	17.4	NO INFO
Soma Bear Dance Flower- C35	14.9	NO INFO														Afghan (Pre-roll)- C5	17.46	NO INFO
Blackberry Kush- C1	15	NO INFO														Dark Commander- C1	17.5	NO INFO
Armageddon- C10	15	NO INFO														Oregon Diesel- C5	17.5	0.82
Verde Bubble Jack Flower- C35	15.3	No INFO														Oregon Diesel(Pre-roll)- C5	17.5	0.08
Maui Wowie- C17	15.4	NO INFO														Afghani- C29	17.5	NO INFO
Headband- C1	15.5	NO INFO														Boston Bling- C32	17.5	NO INFO
Blue Dream X GSC- C28	15.56	NO INFO														Strawberry Blonde- C11	17.54	NO INFO
Lavendar Kush- C1	15.6	NO INFO														Tangie- C13a	17.63	0
Shere Kahn- C37a	15.6	NO INFO														Tangie- C13b	17.63	0
Shere Khan - C37b	15.6	NO INFO														Alpenglow- C6	17.67	0
Verde Black Mamba Flower- C35	15.7	NO INFO														12 Year OG- C13a	17.68	0
Raz and Relaxation- C17	15.9	11.3														12 Year OG- C13b	17.68	0
Starkiller- C17	15.9	NO INFO														Sweet Confidential - C1	17.7	NO INFO
Mountain Thunder- C20	16	NO INFO														White Bubba- C15	17.7	0.04
Banana Kush- C28	16	NO INFO														Blue Dream (Pre-roll)- C5	17.76	NO INFO
Pie- C12	16.05	0.04														Zeta Sage- C15	17.83	0.2
Purple OG- C30	16.165	NO INFO														Menelaus OG- C5	17.88	NO INFO
Northern Lights- C15	16.4	0														Blueberry- C16	17.9	0.04
Gelato- C13a	16.44	0.59														Jilly Bean- C4a	17.92	0
Gelato- C13b	16.44	0.59														Jilly Bean- C4b	17.92	0
Blackberry x Blueberry- C15	16.5	0														Jilly Bean- C4c	17.92	0
Lemon Skunk- C32	16.5	NO INFO														Rocky Mountain Blueberry- C20	18	NO INFO
Night Nurse- C33	16.5	0														MTF- C27a	18	0.28
Jack Flash- C13a	16.51	0														Lemon Diesel- C28	18	NO INFO
Jack Flash- C13b	16.51	0														Bubba Kush- C28	18	NO INFO
Super Lemon Haze- C13a	16.54	0														Spicy Disco- C13a	18.02	0
Super Lemon Haze- C13b	16.54	0														Spicy Disco- C13b	18.02	0
Master Kush- C15	16.59	0														Pre '98 Bubba Kush- C1	18.1	NO INFO
Green Crack- C1	16.6	NO INFO														Astro Boy- C6	18.1	0
Black Gorilla (Pre-roll)- C5	16.66	NO INFO														Chem Limeade- C17	18.2	NO INFO
Trill OG- C15	16.68	0.06														THC Bomb- C37a	18.22	NO INFO
303 Kush- C15	16.69	0.06														Northern Lights- C4a	18.33	0
Sour Patch Cookies (Pre-roll)- C5	16.78	NO INFO														Ultra Sonja- C5	18.33	NO INFO
Lifesaver- C4a	16.91	0														Northern Lights- C4b	18.33	0
Lifesaver- C4b	16.91	0														Northern Lights- C4c	18.33	0
Lifesaver- C4c	16.91	0														Maui Wowie- C13a	18.34	0
Cinex- C12	16.96	0.04														Maui Wowie- C13b	18.34	0
Ogre Kush #2- C7	17	0														Clementine Kush- C33	18.35	0
Mimosa- C27a	17	0.25														Jim OG- C13a	18.36	0.67
Super Lemon Haze- C27a	17	NO INFO														Jim OG- C13b	18.36	0.67
Chupacabra- C11	17.01	NO INFO														Peppermint Patty- C17	18.4	0.5
Phishhead Kush- C13a	17.03	0														Cinderella 99- C13a	18.45	0
Phishhead Kush- C13b	17.03	0														Cinderella 99- C13b	18.45	0
Verde Super Lemon Haze Flower- C35	17.1	NO INFO														Snow Goddess- C1	18.5	NO INFO
Alley Cat Kush- C13a	17.11	0														Fluff Head- C15	18.5	0.02
Alley Cat Kush- C13b	17.11	0														Cherry Lime Haze- C29	18.5	NO INFO
Panama Punch- C13a	17.18	0														Lucky Charms- C29	18.5	NO INFO
Panama Punch- C13b	17.18	0														Bubbahead Kush- C30	18.515	NO INFO
THC Bomb - C37b	17.4	NO INFO														Cherry Zephyr- C18	18.52	NO INFO
Afghan (Pre-roll)- C5	17.46	NO INFO														Taffie- C1	18.6	NO INFO
Dark Commander- C1	17.5	NO INFO														Black Gorilla- C5	18.62	NO INFO
Oregon Diesel- C5	17.5	0.82														Grape God- C6	18.675	0
Oregon Diesel(Pre-roll)- C5	17.5	0.08														Girl Scout Cookie- C34	18.68	NO INFO
Afghani- C29	17.5	NO INFO														Sour Joker- C12	18.74	0.04
Boston Bling- C32	17.5	NO INFO														Ogre Kush- C7	18.8	0
Strawberry Blonde- C11	17.54	NO INFO														Verde Big Smooth Flower- C35	18.8	NO INFO
Tangie- C13a	17.63	0														Grape God Bud- C13a	18.86	0
Tangie- C13b	17.63	0														Grape God Bud- C13b	18.86	0
Alpenglow- C6	17.67	0														Bruce Banner #3- C7	18.9	0
12 Year OG- C13a	17.68	0														Stealth Andy's OG Flower- C35	18.9	NO INFO
12 Year OG- C13b	17.68	0														Strawberry Cough- C13a	18.91	1.31
Sweet Confidential - C1	17.7	NO INFO														Strawberry Cough- C13b	18.91	1.31
White Bubba- C15	17.7	0.04														Lucky Charms (Pre-roll)- C5	18.93	NO INFO
Blue Dream (Pre-roll)- C5	17.76	NO INFO														Headband- C13a	18.96	0
Zeta Sage- C15	17.83	0.2														Headband- C13b	18.96	0
Menelaus OG- C5	17.88	NO INFO														White Urkel- C7	19	0
Blueberry- C16	17.9	0.04														Race Fuel OG- C20	19	NO INFO
Jilly Bean- C4a	17.92	0														Mighty Glude- C20	19	NO INFO
Jilly Bean- C4b	17.92	0														Race Fuel OG- C20	19	NO INFO
Jilly Bean- C4c	17.92	0														Flo- C21	19	0
Rocky Mountain Blueberry- C20	18	NO INFO														Sour Grape- C25	19	NO INFO
MTF- C27a	18	0.28														Cinderella 99- C25	19	NO INFO
Lemon Diesel- C28	18	NO INFO														Blue Dream- C27a	19	2
Bubba Kush- C28	18	NO INFO														Big Bubba Diesel- C28	19	NO INFO
Spicy Disco- C13a	18.02	0														Stealth Fruity Peblles Flower- C35	19	NO INFO
Spicy Disco- C13b	18.02	0														Bubba Kush (Pre '98)- C6	19.005	0
Pre '98 Bubba Kush- C1	18.1	NO INFO														Jack Flash- C4a	19.03	0
Astro Boy- C6	18.1	0														Jack Flash- C4b	19.03	0
Chem Limeade- C17	18.2	NO INFO														Jack Flash- C4c	19.03	0
THC Bomb- C37a	18.22	NO INFO														Griz Kush- C4a	19.06	0
Northern Lights- C4a	18.33	0														Redheaded Stranger- C5	19.06	NO INFO
Ultra Sonja- C5	18.33	NO INFO														Griz Kush- C4b	19.06	0
Northern Lights- C4b	18.33	0														Griz Kush- C4c	19.06	0
Northern Lights- C4c	18.33	0														Fall 97- C13a	19.09	0.51
Maui Wowie- C13a	18.34	0														Fall 97- C13b	19.09	0.51
Maui Wowie- C13b	18.34	0														Cannalope Haze- C34	19.09	NO INFO
Clementine Kush- C33	18.35	0														G.S.C. (thin mint cut)- C1	19.1	NO INFO
Jim OG- C13a	18.36	0.67														Magic Carpet- C1	19.1	NO INFO
Jim OG- C13b	18.36	0.67														Mantanuska Thunderfuck- C6	19.15	0
Peppermint Patty- C17	18.4	0.5														Purple Dream- C37b	19.15	NO INFO
Cinderella 99- C13a	18.45	0														Lucky Charms (Pre-roll)- C5	19.18	NO INFO
Cinderella 99- C13b	18.45	0														Jah Zuki- C37b	19.18	NO INFO
Snow Goddess- C1	18.5	NO INFO														Jack Flash- C15	19.2	0.2
Fluff Head- C15	18.5	0.02														Ghost Ship- C33	19.2	0
Cherry Lime Haze- C29	18.5	NO INFO														Flo	19.21	0
Lucky Charms- C29	18.5	NO INFO														Sin Mints- C17	19.3	0.5
Bubbahead Kush- C30	18.515	NO INFO														Purple OG- C5	19.37	NO INFO
Cherry Zephyr- C18	18.52	NO INFO														Purple OG (Pre-roll)- C5	19.37	NO INFO
Taffie- C1	18.6	NO INFO														Flo- C4a	19.38	0
Black Gorilla- C5	18.62	NO INFO														Flo- C4b	19.38	0
Grape God- C6	18.675	0														Flo- C4c	19.38	0
Girl Scout Cookie- C34	18.68	NO INFO														Purple Dream- C7	19.4	0
Sour Joker- C12	18.74	0.04														K Kush- C8	19.46	0.2
Ogre Kush- C7	18.8	0														Bordello- C29	19.5	NO INFO
Verde Big Smooth Flower- C35	18.8	NO INFO														Grape Ape- C29	19.5	NO INFO
Grape God Bud- C13a	18.86	0														Chem Dawg Super Skunk- C32	19.5	NO INFO
Grape God Bud- C13b	18.86	0														Borderliner- C37a	19.58	NO INFO
Bruce Banner #3- C7	18.9	0														Cherry Pie- C13a	19.6	0
Stealth Andy's OG Flower- C35	18.9	NO INFO														Cherry Pie- C13b	19.6	0
Strawberry Cough- C13a	18.91	1.31														Lack of Fire- C2	19.72	NO INFO
Strawberry Cough- C13b	18.91	1.31														Raskal OG- C13a	19.88	0
Lucky Charms (Pre-roll)- C5	18.93	NO INFO														Raskal OG- C13b	19.88	0
Headband- C13a	18.96	0														Cannacraft Creamsile Flower- C35	19.9	0.2
Headband- C13b	18.96	0														Blackberry Kush- C9	20	NO INFO
White Urkel- C7	19	0														Green Crack- C20	20	NO INFO
Race Fuel OG- C20	19	NO INFO														Humdinger OG- C20	20	NO INFO
Mighty Glude- C20	19	NO INFO														Chocolope- C27a	20	1
Race Fuel OG- C20	19	NO INFO														Red Headed Stranger- C28	20	NO INFO
Flo- C21	19	0														Cherry Lemon Haze- C28	20	NO INFO
Sour Grape- C25	19	NO INFO														Grandfire OG- C32	20	NO INFO
Cinderella 99- C25	19	NO INFO														Yumboldt- C32	20	NO INFO
Blue Dream- C27a	19	2														Ghost OG- C32	20	NO INFO
Big Bubba Diesel- C28	19	NO INFO														Primus- C32	20	NO INFO
Stealth Fruity Peblles Flower- C35	19	NO INFO														Lemon Mazar- C32	20	NO INFO
Bubba Kush (Pre '98)- C6	19.005	0														Soma Super Lemon Haze Flower- C35	20	NO INFO
Jack Flash- C4a	19.03	0														Golden Strawberry- C11	20.03	NO INFO
Jack Flash- C4b	19.03	0														Deadhead OG- C1	20.1	NO INFO
Jack Flash- C4c	19.03	0														OG Kush- C25	20.1	NO INFO
Griz Kush- C4a	19.06	0														Grunk- C13a	20.12	0
Redheaded Stranger- C5	19.06	NO INFO														Grunk- C13b	20.12	0
Griz Kush- C4b	19.06	0														Grandaddy Purple- C12	20.13	NO INFO
Griz Kush- C4c	19.06	0														Tangerine Power- C15	20.13	0
Fall 97- C13a	19.09	0.51														Skunkberry- C2	20.15	NO INFO
Fall 97- C13b	19.09	0.51														Rise n Shine- C11	20.17	NO INFO
Cannalope Haze- C34	19.09	NO INFO														Blue Dream- C15	20.18	0.3
G.S.C. (thin mint cut)- C1	19.1	NO INFO														Leeroy- C5	20.2	NO INFO
Magic Carpet- C1	19.1	NO INFO														Chem Dawg- C5	20.2	NO INFO
Mantanuska Thunderfuck- C6	19.15	0														Fukushima- C17	20.2	NO INFO
Purple Dream- C37b	19.15	NO INFO														Stealth Candy Kush Flower- C35	20.2	NO INFO
Lucky Charms (Pre-roll)- C5	19.18	NO INFO														Poseidon OG (Pre-roll)- C5	20.22	NO INFO
Jah Zuki- C37b	19.18	NO INFO														Kurple Fantasy- C1	20.3	NO INFO
Jack Flash- C15	19.2	0.2														Light of Jah- C4a	20.3	0
Ghost Ship- C33	19.2	0														Sour Diesel- C6	20.3	0
Flo	19.21	0														Green Krack- C17	20.3	1.6
Sin Mints- C17	19.3	0.5														Queen Mother of Goji- C17	20.3	NO INFO
Purple OG- C5	19.37	NO INFO														Light of Jah- C4b	20.3	0
Purple OG (Pre-roll)- C5	19.37	NO INFO														Light of Jah- C4c	20.3	0
Flo- C4a	19.38	0														Chem Dawg- C28	20.3	NO INFO
Flo- C4b	19.38	0														Grand Daddy Purple- C30	20.385	NO INFO
Flo- C4c	19.38	0														Cheese Quake- C18	20.4	NO INFO
Purple Dream- C7	19.4	0														24K Gold- C1	20.5	NO INFO
K Kush- C8	19.46	0.2														Corleone Kush- C11	20.5	NO INFO
Bordello- C29	19.5	NO INFO														Grape Krypt- C25	20.5	No INFO
Grape Ape- C29	19.5	NO INFO														Jack Flash- C25	20.5	NO INFO
Chem Dawg Super Skunk- C32	19.5	NO INFO														Blue Dream- C29	20.5	NO INFO
Borderliner- C37a	19.58	NO INFO														Kushmaster- C32	20.5	NO INFO
Cherry Pie- C13a	19.6	0														303 OG- C13a	20.52	0
Cherry Pie- C13b	19.6	0														303 OG- C13b	20.52	0
Lack of Fire- C2	19.72	NO INFO														Trainwreck- C13a	20.58	0
Raskal OG- C13a	19.88	0														Trainwreck- C13b	20.58	0
Raskal OG- C13b	19.88	0														Starkiller- C34	20.62	NO INFO
Cannacraft Creamsile Flower- C35	19.9	0.2														Limon- C15	20.69	0
Blackberry Kush- C9	20	NO INFO														Northern AK- C16	20.69	0
Green Crack- C20	20	NO INFO														Alien Rocky Candy- C2	20.7	NO INFO
Humdinger OG- C20	20	NO INFO														Mob Boss- C5	20.7	NO INFO
Chocolope- C27a	20	1														Apollo 13- C10	20.7	NO INFO
Red Headed Stranger- C28	20	NO INFO														Alchemy- C11	20.7	NO INFO
Cherry Lemon Haze- C28	20	NO INFO														Trainwreck- C25	20.73	NO INFO
Grandfire OG- C32	20	NO INFO														Key Lime Pie- C13a	20.75	0.6
Yumboldt- C32	20	NO INFO														Key Lime Pie- C13b	20.75	0.6
Ghost OG- C32	20	NO INFO														Pipe Dream- C37a	20.79	NO INFO
Primus- C32	20	NO INFO														Pipe Dream- C37b	20.79	NO INFO
Lemon Mazar- C32	20	NO INFO														Pootie Tang- C15	20.8	0.02
Soma Super Lemon Haze Flower- C35	20	NO INFO														Headwreck- C33	20.8	0
Golden Strawberry- C11	20.03	NO INFO														Blueberry Headband- C34	20.82	NO INFO
Deadhead OG- C1	20.1	NO INFO														Cypress OG- C13a	20.84	0
OG Kush- C25	20.1	NO INFO														Cypress OG- C13b	20.84	0
Grunk- C13a	20.12	0														Ice Cream- C6	20.86	0
Grunk- C13b	20.12	0														Skywalker OG- C13a	20.87	0
Grandaddy Purple- C12	20.13	NO INFO														Skywalker OG- C13b	20.87	0
Tangerine Power- C15	20.13	0														Chem Dawg(Pre-roll)- C5	20.9	NO INFO
Skunkberry- C2	20.15	NO INFO														Sueno- C34	20.9	NO INFO
Rise n Shine- C11	20.17	NO INFO														Raindrop Reba Flower- C35	20.9	NO INFO
Blue Dream- C15	20.18	0.3														Alien OG Kush- C15	20.98	0.3
Leeroy- C5	20.2	NO INFO														Haze- C1	21	NO INFO
Chem Dawg- C5	20.2	NO INFO														Critical Mass- C7	21	0
Fukushima- C17	20.2	NO INFO														Lemon Diesel- C7	21	0
Stealth Candy Kush Flower- C35	20.2	NO INFO														Lemon Skunk- C7	21	0
Poseidon OG (Pre-roll)- C5	20.22	NO INFO														East Coast Sour Diesel- C9	21	NO INFO
Kurple Fantasy- C1	20.3	NO INFO														Sour Kosher- C9	21	NO INFO
Light of Jah- C4a	20.3	0														Mandarin Cookies- C9	21	NO INFO
Sour Diesel- C6	20.3	0														Island Sweet Skunk- C17	21	NO INFO
Green Krack- C17	20.3	1.6														Blue Dream- C20	21	NO INFO
Queen Mother of Goji- C17	20.3	NO INFO														Hell's OG- C20	21	NO INFO
Light of Jah- C4b	20.3	0														Leeroy- C25	21	NO INFO
Light of Jah- C4c	20.3	0														Dominoff#7- C27a	21	2
Chem Dawg- C28	20.3	NO INFO														Quantum Kush- C27a	21	0.32
Grand Daddy Purple- C30	20.385	NO INFO														Blue Dream- C12	21.06	NO INFO
Cheese Quake- C18	20.4	NO INFO														Durban Poison- C13a	21.07	0
24K Gold- C1	20.5	NO INFO														Durban Poison- C13b	21.07	0
Corleone Kush- C11	20.5	NO INFO														Chem Dawg- C1	21.1	NO INFO
Grape Krypt- C25	20.5	No INFO														White Rhino- C10	21.1	NO INFO
Jack Flash- C25	20.5	NO INFO														Maui- C4a	21.11	0
Blue Dream- C29	20.5	NO INFO														Maui- C4b	21.11	0
Kushmaster- C32	20.5	NO INFO														Maui- C4c	21.11	0
303 OG- C13a	20.52	0														Borderliner- C37b	21.19	NO INFO
303 OG- C13b	20.52	0														Afghani- C1	21.2	NO INFO
Trainwreck- C13a	20.58	0														Purple Bio Diesel- C1	21.2	NO INFO
Trainwreck- C13b	20.58	0														Jeff Sesh-ons- C37b	21.2	NO INFO
Starkiller- C34	20.62	NO INFO														LA Kush- C12	21.21	NO INFO
Limon- C15	20.69	0														Golden Goat- C13a	21.22	0.56
Northern AK- C16	20.69	0														Golden Goat- C13b	21.22	0.56
Alien Rocky Candy- C2	20.7	NO INFO														Blue Dream- C4a	21.23	0
Mob Boss- C5	20.7	NO INFO														Blue Dream- C4b	21.23	0
Apollo 13- C10	20.7	NO INFO														Blue Dream- C4c	21.23	0
Alchemy- C11	20.7	NO INFO														Skywalker x OG Kush- C5	21.29	0.72
Trainwreck- C25	20.73	NO INFO														707 Headband- C16	21.29	0.05
Key Lime Pie- C13a	20.75	0.6														Last Dance- C17	21.3	NO INFO
Key Lime Pie- C13b	20.75	0.6														Recon OG- C34	21.31	NO INFO
Pipe Dream- C37a	20.79	NO INFO														Papaya- C30	21.4	NO INFO
Pipe Dream- C37b	20.79	NO INFO														Tres Star- C36	21.45	NO INFO
Pootie Tang- C15	20.8	0.02														Pineapple Express- C28	21.48	NO INFO
Headwreck- C33	20.8	0														Bubba- C17	21.5	0.9
Blueberry Headband- C34	20.82	NO INFO														Orange Legend- C36	21.5	NO INFO
Cypress OG- C13a	20.84	0														Danky Kong- C37a	21.5	NO INFO
Cypress OG- C13b	20.84	0														Danky Kong- C37b	21.5	NO INFO
Ice Cream- C6	20.86	0														Super Lemon Haze- C30	21.51	NO INFO
Skywalker OG- C13a	20.87	0														Andy's OG- C37a	21.51	NO INFO
Skywalker OG- C13b	20.87	0														Andy's OG - C37b	21.51	NO INFO
Chem Dawg(Pre-roll)- C5	20.9	NO INFO														Jilly Bean- C11	21.58	NO INFO
Sueno- C34	20.9	NO INFO														Old Time Bubblegum- C30	21.58	NO INFO
Raindrop Reba Flower- C35	20.9	NO INFO														Carpe Diem (Pre-roll)- C5	21.59	NO INFO
Alien OG Kush- C15	20.98	0.3														Platinum Girl Scout Cookies- C13a	21.6	0
Haze- C1	21	NO INFO														Platinum Girl Scout Cookies- C13b	21.6	0
Critical Mass- C7	21	0														Jah Kush- C37a	21.61	NO INFO
Lemon Diesel- C7	21	0														Jah Kush- C37b	21.61	NO INFO
Lemon Skunk- C7	21	0														Purple Cotton- C15	21.62	0
East Coast Sour Diesel- C9	21	NO INFO														Lavendar Jones- C4a	21.67	0
Sour Kosher- C9	21	NO INFO														Lavendar Jones- C4	21.67	0
Mandarin Cookies- C9	21	NO INFO														Lavendar Jones- C4c	21.67	0
Island Sweet Skunk- C17	21	NO INFO														Jack Flash- C28	21.67	NO INFO
Blue Dream- C20	21	NO INFO														Smurfette- C5	21.69	NO INFO
Hell's OG- C20	21	NO INFO														Chemdawg 91- C36	21.75	NO INFO
Leeroy- C25	21	NO INFO														Chocolope- C34	21.765	NO INFO
Dominoff#7- C27a	21	2														Black Afghani- C15	21.8	0
Quantum Kush- C27a	21	0.32														Strawberry Lemonade- C4a	21.85	NO INFO
Blue Dream- C12	21.06	NO INFO														Strawberry Lemonade- C4b	21.85	NO INFO
Durban Poison- C13a	21.07	0														Strawberry Lemonade- C4c	21.85	NO INFO
Durban Poison- C13b	21.07	0														CamBand- C37a	21.86	NO INFO
Chem Dawg- C1	21.1	NO INFO														Island Sweet Skunk- C12	21.88	NO INFO
White Rhino- C10	21.1	NO INFO														Banana Kush- C15	21.9	0
Maui- C4a	21.11	0														99 Pineapples- C17	21.9	NO INFO
Maui- C4b	21.11	0														Ghost Ship- C37a	21.9	NO INFO
Maui- C4c	21.11	0														Purple Rain- C37a	21.91	NO INFO
Borderliner- C37b	21.19	NO INFO														Pre '98 Bubba Kush- C2	21.92	NO INFO
Afghani- C1	21.2	NO INFO														Ghost OG- C13a	21.96	0
Purple Bio Diesel- C1	21.2	NO INFO														Ghost OG- C13b	21.96	0
Jeff Sesh-ons- C37b	21.2	NO INFO														Mandarin OG- C4a	22	0
LA Kush- C12	21.21	NO INFO														Girl Scout Cookies- C9	22	NO INFO
Golden Goat- C13a	21.22	0.56														Purple Pucker- C9	22	NO INFO
Golden Goat- C13b	21.22	0.56														Brain OG- C9	22	NO INFO
Blue Dream- C4a	21.23	0														Chem Night Fire Alien- C9	22	NO INFO
Blue Dream- C4b	21.23	0														Beijnho- C9	22	NO INFO
Blue Dream- C4c	21.23	0														Alien OG- C14	22	NO INFO
Skywalker x OG Kush- C5	21.29	0.72														Tangerine Haze- C16	22	0
707 Headband- C16	21.29	0.05														Mandarin OG- C4b	22	0
Last Dance- C17	21.3	NO INFO														Mandarin OG- C4c	22	0
Recon OG- C34	21.31	NO INFO														Nepali Kush- C27	22	0
Papaya- C30	21.4	NO INFO														Lemon Skunk	22	0.27
Tres Star- C36	21.45	NO INFO														Sour Dread- C32	22	NO INFO
Pineapple Express- C28	21.48	NO INFO														Madrone Chem Krush Flower- C35	22	NO INFO
Bubba- C17	21.5	0.9														Sugar Cookies - C14	22.05	0
Orange Legend- C36	21.5	NO INFO														J.R. Cash- C34	22.08	NO INFO
Danky Kong- C37a	21.5	NO INFO														Bay Dream- C15	22.1	0.3
Danky Kong- C37b	21.5	NO INFO														Durban Poison- C17	22.1	NO INFO
Super Lemon Haze- C30	21.51	NO INFO														Mob Boss- C11	22.11	NO INFO
Andy's OG- C37a	21.51	NO INFO														Chem Dawg- C6	22.16	0
Andy's OG - C37b	21.51	NO INFO														Chem #4- C37a	22.16	NO INFO
Jilly Bean- C11	21.58	NO INFO														Bio-Diesel- C2	22.19	NO INFO
Old Time Bubblegum- C30	21.58	NO INFO														Blueberry- C17	22.2	0.6
Carpe Diem (Pre-roll)- C5	21.59	NO INFO														Louvre (Pre-roll)- C5	22.21	NO INFO
Platinum Girl Scout Cookies- C13a	21.6	0														Stardawg- C36	22.25	NO INFO
Platinum Girl Scout Cookies- C13b	21.6	0														Dark Ghost- C30	22.26	NO INFO
Jah Kush- C37a	21.61	NO INFO														Queen of Sheba (Pre-roll)- C5	22.28	NO INFO
Jah Kush- C37b	21.61	NO INFO														Durban Poison- C11	22.34	NO INFO
Purple Cotton- C15	21.62	0														NYC Diesel (Pre-roll)- C5	22.35	NO INFO
Lavendar Jones- C4a	21.67	0														Durban X Tangie- C18	22.35	NO INFO
Lavendar Jones- C4	21.67	0														Black Boss- C33	22.35	0
Lavendar Jones- C4c	21.67	0														GG4- C14	22.38	0
Jack Flash- C28	21.67	NO INFO														Dosidos- C34	22.465	NO INFO
Smurfette- C5	21.69	NO INFO														Golden Goat- C37a	22.47	NO INFO
Chemdawg 91- C36	21.75	NO INFO														Pink Bubblegum Romunlan- C4a	22.49	0
Chocolope- C34	21.765	NO INFO														Pink Bubblegum Romunlan- C4b	22.49	0
Black Afghani- C15	21.8	0														Pink Bubblegum Romunlan- C4c	22.49	0
Strawberry Lemonade- C4a	21.85	NO INFO														Kryptonite- C1	22.5	NO INFO
Strawberry Lemonade- C4b	21.85	NO INFO														Purple Jones- C1	22.5	NO INFO
Strawberry Lemonade- C4c	21.85	NO INFO														Sueno- C17	22.5	NO INFO
CamBand- C37a	21.86	NO INFO														Golden Goat- C29	22.5	NO INFO
Island Sweet Skunk- C12	21.88	NO INFO														Bear Dance- C29	22.5	NO INFO
Banana Kush- C15	21.9	0														92 OG- C13a	22.52	0
99 Pineapples- C17	21.9	NO INFO														92 OG- C13b	22.52	0
Ghost Ship- C37a	21.9	NO INFO														El Diablo- C15	22.53	0.13
Purple Rain- C37a	21.91	NO INFO														Kosher Kush- C15	22.57	0.12
Pre '98 Bubba Kush- C2	21.92	NO INFO														G6 #3- C37b	22.59	NO INFO
Ghost OG- C13a	21.96	0														Fainting Goat- C33	22.6	0.05
Ghost OG- C13b	21.96	0														Kosher Kush- C13a	22.62	0
Mandarin OG- C4a	22	0														Kosher Kush- C13b	22.62	0
Girl Scout Cookies- C9	22	NO INFO														Glass Apple- C4a	22.67	0
Purple Pucker- C9	22	NO INFO														Glass Apple- C4b	22.67	0
Brain OG- C9	22	NO INFO														Glass Apple- C4c	22.67	0
Chem Night Fire Alien- C9	22	NO INFO														Heavenly Haze- C6	22.7	0
Beijnho- C9	22	NO INFO														Dream Berry Haze- C12	22.72	NO INFO
Alien OG- C14	22	NO INFO														Sour Head- C6	22.8	0
Tangerine Haze- C16	22	0														The Glue- C15	22.8	0
Mandarin OG- C4b	22	0														Death Star- C17	22.8	NO INFO
Mandarin OG- C4c	22	0														Bubba Kush- C13a	22.81	0
Nepali Kush- C27	22	0														Bubba Kush- C13b	22.81	0
Lemon Skunk	22	0.27														Super Blue Thai- C28	22.81	NO INFO
Sour Dread- C32	22	NO INFO														L.A. Confidential- C28	22.82	NO INFO
Madrone Chem Krush Flower- C35	22	NO INFO														Kandy Kush- C2	22.87	NO INFO
Sugar Cookies - C14	22.05	0														Confidential- C1	22.9	NO INFO
J.R. Cash- C34	22.08	NO INFO														Cannacraft Golden Goat Flower- C35	22.9	NO INFO
Bay Dream- C15	22.1	0.3														Pre 98 Bubba X Phishhead OG- C18	22.92	NO INFO
Durban Poison- C17	22.1	NO INFO														Mountain Thunder- C11	22.96	NO INFO
Mob Boss- C11	22.11	NO INFO														OG- 18- C18	22.96	NO INFO
Chem Dawg- C6	22.16	0														Golden Goat- C4a	22.98	0
Chem #4- C37a	22.16	NO INFO														Golden Goat- C4b	22.98	0
Bio-Diesel- C2	22.19	NO INFO														Golden Goat- C4c	22.98	0
Blueberry- C17	22.2	0.6														Dawg Waltz- C5	23	NO INFO
Louvre (Pre-roll)- C5	22.21	NO INFO														GG5- C7	23	0
Stardawg- C36	22.25	NO INFO														TD Lingo- C9	23	NO INFO
Dark Ghost- C30	22.26	NO INFO														Bubba Berry- C9	23	NO INFO
Queen of Sheba (Pre-roll)- C5	22.28	NO INFO														303 Kush- C9	23	NO INFO
Durban Poison- C11	22.34	NO INFO														Recon- C16	23	0
NYC Diesel (Pre-roll)- C5	22.35	NO INFO														Strawberry Blonde- C20	23	NO INFO
Durban X Tangie- C18	22.35	NO INFO														Super Lemon Haze- C20	23	NO INFO
Black Boss- C33	22.35	0														Sour Berry Blue- C20	23	NO INFO
GG4- C14	22.38	0														Black Boss- C21	23	0
Dosidos- C34	22.465	NO INFO														Grape Ape- C21	23	0
Golden Goat- C37a	22.47	NO INFO														Blueberry Headband- C21	23	0
Pink Bubblegum Romunlan- C4a	22.49	0														Lemon Cap- C27a	23	0
Pink Bubblegum Romunlan- C4b	22.49	0														Nerds- C27a	23	NO INFO
Pink Bubblegum Romunlan- C4c	22.49	0														Gorilla Glue- C28	23	NO INFO
Kryptonite- C1	22.5	NO INFO														Larr OG- C29	23	NO INFO
Purple Jones- C1	22.5	NO INFO														Golden Goat- C12	23.03	NO INFO
Sueno- C17	22.5	NO INFO														Lemon Cap- C34	23.03	NO INFO
Golden Goat- C29	22.5	NO INFO														OG Kush Dominant- C2	23.05	NO INFO
Bear Dance- C29	22.5	NO INFO														Sour Joker- C8	23.06	0.2
92 OG- C13a	22.52	0														Sour Diesel- C13a	23.07	0
92 OG- C13b	22.52	0														Sour Diesel- C13b	23.07	0
El Diablo- C15	22.53	0.13														East Coast Sour Diesel- C37b	23.12	No INFO
Kosher Kush- C15	22.57	0.12														Blue Dream- C37a	23.14	NO INFO
G6 #3- C37b	22.59	NO INFO														Blue Dream- C37b	23.14	NO INFO
Fainting Goat- C33	22.6	0.05														Ghost Train Haze- C34	23.16	NO INFO
Kosher Kush- C13a	22.62	0														Tahoe OG- C5	23.18	NO INFO
Kosher Kush- C13b	22.62	0														OG Kush- C11	23.27	NO INFO
Glass Apple- C4a	22.67	0														Long's Peak Blue- C6	23.3	0
Glass Apple- C4b	22.67	0														Toxic Kool Aid- C17	23.3	NO INFO
Glass Apple- C4c	22.67	0														Daytime (Pre-roll)- C5	23.37	NO INFO
Heavenly Haze- C6	22.7	0														East Coast Sour Diesel- C1	23.4	NO INFO
Dream Berry Haze- C12	22.72	NO INFO														Strawberry Sequoia- C18	23.41	NO INFO
Sour Head- C6	22.8	0														Lemon Skunk- C25	23.46	NO INFO
The Glue- C15	22.8	0														Bubba Kush- C5	23.47	NO INFO
Death Star- C17	22.8	NO INFO														Holy Grail Kush- C29	23.5	4
Bubba Kush- C13a	22.81	0														Blue Nina- C33	23.5	0
Bubba Kush- C13b	22.81	0														SCG Blackwater OG Flower- C35	23.5	NO INFO
Super Blue Thai- C28	22.81	NO INFO														Holy Grail Kush- C2	23.54	NO INFO
L.A. Confidential- C28	22.82	NO INFO														Death Star- C2	23.57	NO INFO
Kandy Kush- C2	22.87	NO INFO														Green Crack- C2	23.6	NO INFO
Confidential- C1	22.9	NO INFO														White Urkle- C25	23.6	NO INFO
Cannacraft Golden Goat Flower- C35	22.9	NO INFO														Cannacraft Deathstar Flower- C35	23.6	0.2
Pre 98 Bubba X Phishhead OG- C18	22.92	NO INFO														Headband - C37b	23.6	NO INFO
Mountain Thunder- C11	22.96	NO INFO														Headband- C37a	23.63	NO INFO
OG- 18- C18	22.96	NO INFO														Poltergeist- C37b	23.65	NO INFO
Golden Goat- C4a	22.98	0														Chocolope- C12	23.66	1.02
Golden Goat- C4b	22.98	0														Clementine- C2	23.67	NO INFO
Golden Goat- C4c	22.98	0														Stardawg- C2	23.67	NO INFO
Dawg Waltz- C5	23	NO INFO														Chupacabra- C14	23.68	2.1
GG5- C7	23	0														Blue Dream- C10	23.7	NO INFO
TD Lingo- C9	23	NO INFO														Mako Haze- C11	23.7	NO INFO
Bubba Berry- C9	23	NO INFO														Grinch OG- C37a	23.7	NO INFO
303 Kush- C9	23	NO INFO														Hunky Monkey- C28	23.73	NO INFO
Recon- C16	23	0														Jack's Pie- C14	23.77	0
Strawberry Blonde- C20	23	NO INFO														Tropicana- C5	23.8	NO INFO
Super Lemon Haze- C20	23	NO INFO														Chem Dawg #4 x Alien OG- C15	23.8	0
Sour Berry Blue- C20	23	NO INFO														Bio Chem #4- C37a	23.8	NO INFO
Black Boss- C21	23	0														Bio Chem #4- C37b	23.8	NO INFO
Grape Ape- C21	23	0														Mob Boss- C5	23.87	NO INFO
Blueberry Headband- C21	23	0														Sour Diesel- C11	23.9	NO INFO
Lemon Cap- C27a	23	0														Screaming Tangerine- C14	23.92	0
Nerds- C27a	23	NO INFO														Gorila Glue- C34	23.935	NO INFO
Gorilla Glue- C28	23	NO INFO														Moby Dick- C11	23.97	NO INFO
Larr OG- C29	23	NO INFO														Strawberry Banana- C13a	23.99	0.78
Golden Goat- C12	23.03	NO INFO														Strawberry Banana- C13b	23.99	0.78
Lemon Cap- C34	23.03	NO INFO														Pucker- C18	23.99	NO INFO
OG Kush Dominant- C2	23.05	NO INFO														King Chem Kush- C1	24	NO INFO
Sour Joker- C8	23.06	0.2														Blue Dream- C9	24	NO INFO
Sour Diesel- C13a	23.07	0														Cheesel- C9	24	NO INFO
Sour Diesel- C13b	23.07	0														Chemdog- C20	24	NO INFO
East Coast Sour Diesel- C37b	23.12	No INFO														Blackbeat OG- C20	24	NO INFO
Blue Dream- C37a	23.14	NO INFO														Green Crack- C21	24	0
Blue Dream- C37b	23.14	NO INFO														Starkiller- C32	24	NO INFO
Ghost Train Haze- C34	23.16	NO INFO														Girl- C2	24.15	NO INFO
Tahoe OG- C5	23.18	NO INFO														Shaw Bud #7- C37b	24.15	NO INFO
OG Kush- C11	23.27	NO INFO														Julius Caesar- C14	24.16	NO INFO
Long's Peak Blue- C6	23.3	0														Mob Boss- C15	24.2	0.01
Toxic Kool Aid- C17	23.3	NO INFO														Mustang Sally- C37a	24.2	NO INFO
Daytime (Pre-roll)- C5	23.37	NO INFO														SAGE- C13a	24.26	0
East Coast Sour Diesel- C1	23.4	NO INFO														SAGE- C13b	24.26	0
Strawberry Sequoia- C18	23.41	NO INFO														Stardawg- C14	24.28	0
Lemon Skunk- C25	23.46	NO INFO														Cookies and Cream- C37b	24.29	NO INFO
Bubba Kush- C5	23.47	NO INFO														Snoop OG- C11	24.32	NO INFO
Holy Grail Kush- C29	23.5	4														Blackberry Dream- C25	24.32	NO INFO
Blue Nina- C33	23.5	0														Nighttime (Pre-roll)- C5	24.35	NO INFO
SCG Blackwater OG Flower- C35	23.5	NO INFO														Gupta Kush- C16	24.4	0
Holy Grail Kush- C2	23.54	NO INFO														Poltergeist- C37a	24.4	NO INFO
Death Star- C2	23.57	NO INFO														Sour Diesel- C4a	24.42	0
Green Crack- C2	23.6	NO INFO														Sour Diesel- C4b	24.42	0
White Urkle- C25	23.6	NO INFO														Sour Diesel- C4c	24.42	0
Cannacraft Deathstar Flower- C35	23.6	0.2														Clementien Kush- C34	24.47	NO INFO
Headband - C37b	23.6	NO INFO														Sherbert- C14	24.49	0
Headband- C37a	23.63	NO INFO														Odysseus OG (Pre-roll)- C5	24.5	NO INFO
Poltergeist- C37b	23.65	NO INFO														Golden Goat- C15	24.5	0.02
Chocolope- C12	23.66	1.02														Blue Dream- C25	24.5	NO INFO
Clementine- C2	23.67	NO INFO														Chem 4- C29	24.5	NO INFO
Stardawg- C2	23.67	NO INFO														Screaming Gorila- C37a	24.5	NO INFO
Chupacabra- C14	23.68	2.1														Bruce Banner- C5	24.63	NO INFO
Blue Dream- C10	23.7	NO INFO														Jabberwocky- C37b	24.7	NO INFO
Mako Haze- C11	23.7	NO INFO														Space Cream- C15	24.9	0.03
Grinch OG- C37a	23.7	NO INFO														Stardawg Guava- C13a	24.93	0.52
Hunky Monkey- C28	23.73	NO INFO														Stardawg Guava- C13b	24.93	0.52
Jack's Pie- C14	23.77	0														Jabberwocky- C37a	24.94	NO INFO
Tropicana- C5	23.8	NO INFO														Shaw #3- C37a	24.94	NO INFO
Chem Dawg #4 x Alien OG- C15	23.8	0														Lucky Charms- C2	24.99	NO INFO
Bio Chem #4- C37a	23.8	NO INFO														Bubba Kush- C7	25	0
Bio Chem #4- C37b	23.8	NO INFO														Sunset Sherbert- C7	25	0
Mob Boss- C5	23.87	NO INFO														Jesus OG- C9	25	NO INFO
Sour Diesel- C11	23.9	NO INFO														Race Fuel- C9	25	NO INFO
Screaming Tangerine- C14	23.92	0														Super Sour Lemon- C9	25	NO INFO
Gorila Glue- C34	23.935	NO INFO														Bruce Banner #3- C9	25	NO INFO
Moby Dick- C11	23.97	NO INFO														Cookies and Cream- C9	25	NO INFO
Strawberry Banana- C13a	23.99	0.78														Headband- C20	25	No INFO
Strawberry Banana- C13b	23.99	0.78														Moon Walk- C20	25	No INFO
Pucker- C18	23.99	NO INFO														OG Glue- C20	25	NO INFO
King Chem Kush- C1	24	NO INFO														Kosher Kush- C27a	25	0.71
Blue Dream- C9	24	NO INFO														X-wing- C13a	25.02	0
Cheesel- C9	24	NO INFO														X-wing- C13b	25.02	0
Chemdog- C20	24	NO INFO														Golden Goat- C16	25.1	0.95
Blackbeat OG- C20	24	NO INFO														Mighty Tree Tahoe OG Flower- C35	25.1	0.9
Green Crack- C21	24	0														Sugar Cookies- C14	25.11	NO INFO
Starkiller- C32	24	NO INFO														Trainwreck- C4a	25.16	0
Girl- C2	24.15	NO INFO														Trainwreck- C4b	25.16	0
Shaw Bud #7- C37b	24.15	NO INFO														Trainwreck- C4c	25.16	0
Julius Caesar- C14	24.16	NO INFO														Bruce Banner- C11	25.17	NO INFO
Mob Boss- C15	24.2	0.01														Lemon OG- C17	25.2	NO INFO
Mustang Sally- C37a	24.2	NO INFO														Afghan- C28	25.35	NO INFO
SAGE- C13a	24.26	0														Blue Dream- C21	25.36	NO INFO
SAGE- C13b	24.26	0														G13- C11	25.41	NO INFO
Stardawg- C14	24.28	0														Golden Goat- C37b	25.41	NO INFO
Cookies and Cream- C37b	24.29	NO INFO														Hash Plant- C11	25.43	NO INFO
Snoop OG- C11	24.32	NO INFO														Grape Krypt- C12	25.47	NO INFO
Blackberry Dream- C25	24.32	NO INFO														Sour Joker- C29	25.5	NO INFO
Nighttime (Pre-roll)- C5	24.35	NO INFO														Ghost OG- C29	25.5	NO INFO
Gupta Kush- C16	24.4	0														Skunkberry- C29	25.5	NO INFO
Poltergeist- C37a	24.4	NO INFO														Girl Scout Cookies- C29	25.5	NO INFO
Sour Diesel- C4a	24.42	0														East Coas Sour Diesel- C37a	25.55	NO INFO
Sour Diesel- C4b	24.42	0														Chem 91- C37b	25.55	NO INFO
Sour Diesel- C4c	24.42	0														Super Lemon Haze- C2	25.68	NO INFO
Clementien Kush- C34	24.47	NO INFO														Raindrop Bruce Banner Flower- C35	25.7	NO INFO
Sherbert- C14	24.49	0														Mighty Tree Durban Poison Flower- C35	25.8	NO INFO
Odysseus OG (Pre-roll)- C5	24.5	NO INFO														The white x Cindy 99 (Pre-roll)- C5	25.9	NO INFO
Golden Goat- C15	24.5	0.02														Collin OG- C16	25.92	0
Blue Dream- C25	24.5	NO INFO														AJ's- C30	25.94	NO INFO
Chem 4- C29	24.5	NO INFO														Cherry Diesel- C9	26	NO INFO
Screaming Gorila- C37a	24.5	NO INFO														Glass Slipper- C9	26	NO INFO
Bruce Banner- C5	24.63	NO INFO														Ghost OG- C9	26	NO INFO
Jabberwocky- C37b	24.7	NO INFO														Flo OG- C9	26	NO INFO
Space Cream- C15	24.9	0.03														GG #4- C9	26	NO INFO
Stardawg Guava- C13a	24.93	0.52														Cheesel- C9	26	NO INFO
Stardawg Guava- C13b	24.93	0.52														Sueno- C9	26	NO INFO
Jabberwocky- C37a	24.94	NO INFO														Alpha Blue- C20	26	NO INFO
Shaw #3- C37a	24.94	NO INFO														Dutch Treat Haze- C27a	26	1
Lucky Charms- C2	24.99	NO INFO														St. Solomon's Island- C28	26	NO INFO
Bubba Kush- C7	25	0														Ecto-Cooler Cannabis- C29	26	NO INFO
Sunset Sherbert- C7	25	0														Ghost of Leeroy- C29	26	NO INFO
Jesus OG- C9	25	NO INFO														Jet Fuel- C15	26.1	0.03
Race Fuel- C9	25	NO INFO														Mothers Milk- C4a	26.14	0
Super Sour Lemon- C9	25	NO INFO														Mothers Milk- C4b	26.14	0
Bruce Banner #3- C9	25	NO INFO														Mothers Milk- C4c	26.14	0
Cookies and Cream- C9	25	NO INFO														Starkiller- C18	26.16	NO INFO
Headband- C20	25	No INFO														Blue Dream- C2	26.2	NO INFO
Moon Walk- C20	25	No INFO														Red Headed Stranger- C17	26.2	NO INFO
OG Glue- C20	25	NO INFO														Veritas Ghost OG Flower- C35	26.2	NO INFO
Kosher Kush- C27a	25	0.71														Veritas Glass Slipper Flower- C35	26.2	NO INFO
X-wing- C13a	25.02	0														Rocket Fuel- C37a	26.28	NO INFO
X-wing- C13b	25.02	0														Mob Boss- C5	26.29	NO INFO
Golden Goat- C16	25.1	0.95														Banana Kush- C18	26.31	NO INFO
Mighty Tree Tahoe OG Flower- C35	25.1	0.9														Chem 91- C37a	26.33	NO INFO
Sugar Cookies- C14	25.11	NO INFO														Fruity Pebbles- C37a	26.34	NO INFO
Trainwreck- C4a	25.16	0														Fruity Pebbles- C37b	26.34	NO INFO
Trainwreck- C4b	25.16	0														Butter Cookies- C34	26.38	NO INFO
Trainwreck- C4c	25.16	0														Golden Goat- C25	26.4	NO INFO
Bruce Banner- C11	25.17	NO INFO														Sunset Sherbert- C14	26.49	0
Lemon OG- C17	25.2	NO INFO														Purple Dogbud- C18	26.5	NO INFO
Afghan- C28	25.35	NO INFO														Green Crack- C25	26.5	NO INFO
Blue Dream- C21	25.36	NO INFO														Iced Grapefruit- C25	26.5	NO INFO
G13- C11	25.41	NO INFO														Lucinda Williams- C29	26.5	NO INFO
Golden Goat- C37b	25.41	NO INFO														Triangle Kush- C29	26.5	NO INFO
Hash Plant- C11	25.43	NO INFO														Gorilla Glue #4- C29	26.5	NO INFO
Grape Krypt- C12	25.47	NO INFO														Chemdawg X- C34	26.515	NO INFO
Sour Joker- C29	25.5	NO INFO														Alien Dawg- C11	26.62	NO INFO
Ghost OG- C29	25.5	NO INFO														Biochem- C5	26.63	NO INFO
Skunkberry- C29	25.5	NO INFO														9 pound hammer- C5	26.66	NO INFO
Girl Scout Cookies- C29	25.5	NO INFO														Bruce Banner- C6	26.68	0
East Coas Sour Diesel- C37a	25.55	NO INFO														Mighty Tree Blue Headband Flower- C35	26.7	NO INFO
Chem 91- C37b	25.55	NO INFO														Bruce Banner #3- C4a	26.72	0
Super Lemon Haze- C2	25.68	NO INFO														Bruce Banner #3- C4b	26.72	0
Raindrop Bruce Banner Flower- C35	25.7	NO INFO														Bruce Banner #3- C4c	26.72	0
Mighty Tree Durban Poison Flower- C35	25.8	NO INFO														White 99- C4a	26.8	NO INFO
The white x Cindy 99 (Pre-roll)- C5	25.9	NO INFO														White 99- C4b	26.8	NO INFO
Collin OG- C16	25.92	0														White 99- C4c	26.8	NO INFO
AJ's- C30	25.94	NO INFO														Sour Diesel- C34	26.845	NO INFO
Cherry Diesel- C9	26	NO INFO														Bubba Kush- C5	26.89	NO INFO
Glass Slipper- C9	26	NO INFO														Hell's Fire- C1	26.9	NO INFO
Ghost OG- C9	26	NO INFO														Raindrop Blue Dream Flower- C35	26.9	NO INFO
Flo OG- C9	26	NO INFO														Veritas Brain OG Flower- C35	26.9	NO INFO
GG #4- C9	26	NO INFO														Chem Dawg- C5	26.93	NO INFO
Cheesel- C9	26	NO INFO														Angel OG- C2	27	NO INFO
Sueno- C9	26	NO INFO														AJ's bud- C9	27	NO INFO
Alpha Blue- C20	26	NO INFO														Skywalker OG- C17	27	2.3
Dutch Treat Haze- C27a	26	1														Golden Goat- C20	27	NO INFO
St. Solomon's Island- C28	26	NO INFO														Star Killer- C20	27	NO INFO
Ecto-Cooler Cannabis- C29	26	NO INFO														Starfighter- C20	27	NO INFO
Ghost of Leeroy- C29	26	NO INFO														True OG- C27a	27	NO INFO
Jet Fuel- C15	26.1	0.03														Cotton Kandy Kush- C27a	27	1
Mothers Milk- C4a	26.14	0														OG Kush- C27a	27	NO INFO
Mothers Milk- C4b	26.14	0														Snurkle- C27a	27	0
Mothers Milk- C4c	26.14	0														Lucky Charms- C18	27.08	NO INFO
Starkiller- C18	26.16	NO INFO														Lucky Charms- C17	27.1	NO INFO
Blue Dream- C2	26.2	NO INFO														East Coast Sour Diesel- C4a	27.15	0
Red Headed Stranger- C17	26.2	NO INFO														East Coast Sour Diesel- C4b	27.15	0
Veritas Ghost OG Flower- C35	26.2	NO INFO														East Coast Sour Diesel- C4c	27.15	0
Veritas Glass Slipper Flower- C35	26.2	NO INFO														Veritas Bubba Chem Flower- C35	27.2	NO INFO
Rocket Fuel- C37a	26.28	NO INFO														Sour Sunset- C1	27.5	NO INFO
Mob Boss- C5	26.29	NO INFO														Tiger's Milk- C29	27.5	NO INFO
Banana Kush- C18	26.31	NO INFO														Mighty Tree Super Skunk Flower- C35	27.5	NO INFO
Chem 91- C37a	26.33	NO INFO														Super Lemon Haze- C12	27.58	NO INFO
Fruity Pebbles- C37a	26.34	NO INFO														Camband- C37b	27.6	NO INFO
Fruity Pebbles- C37b	26.34	NO INFO														G6 #3- C37a	27.64	NO INFO
Butter Cookies- C34	26.38	NO INFO														Regulator Kush- C2	27.65	NO INFO
Golden Goat- C25	26.4	NO INFO														K Kush- C5	27.74	NO INFO
Sunset Sherbert- C14	26.49	0														Goji OG- C12	27.89	0.04
Purple Dogbud- C18	26.5	NO INFO														Jack Herer- C5	27.9	NO INFO
Green Crack- C25	26.5	NO INFO														Colorado Chem- C16	27.94	0
Iced Grapefruit- C25	26.5	NO INFO														Carribean Cooler- C7	28	0
Lucinda Williams- C29	26.5	NO INFO														Cookies and Cream x Purple Punch- C7	28	0
Triangle Kush- C29	26.5	NO INFO														Bubba White- C9	28	NO INFO
Gorilla Glue #4- C29	26.5	NO INFO														Pura Vida- C29	28	NO INFO
Chemdawg X- C34	26.515	NO INFO														AJ Sour Diesel- C2	28.1	NO INFO
Alien Dawg- C11	26.62	NO INFO														Special Ops- C33	28.15	NO INFO
Biochem- C5	26.63	NO INFO														OG Skywalker- C10	28.2	NO INFO
9 pound hammer- C5	26.66	NO INFO														Iron Triangle- C11	28.38	NO INFO
Bruce Banner- C6	26.68	0														Veritas Kerosene Flower- C35	28.4	NO INFO
Mighty Tree Blue Headband Flower- C35	26.7	NO INFO														Kandy Kush- C29	28.5	NO INFO
Bruce Banner #3- C4a	26.72	0														Lee Roy TK #5- C29	28.5	NO INFO
Bruce Banner #3- C4b	26.72	0														Louis XIII- C29	28.5	NO INFO
Bruce Banner #3- C4c	26.72	0														Tahoe OG Kush- C29	28.5	NO INFO
White 99- C4a	26.8	NO INFO														Cookies n Cream- C29	28.5	NO INFO
White 99- C4b	26.8	NO INFO														Stealth Danky Kong Flower- C35	28.6	NO INFO
White 99- C4c	26.8	NO INFO														Legal Haze- C2	28.65	No INFO
Sour Diesel- C34	26.845	NO INFO														Emerald OG- C37a	28.66	NO INFO
Bubba Kush- C5	26.89	NO INFO														Emerald OG- C37b	28.66	NO INFO
Hell's Fire- C1	26.9	NO INFO														Flight- C18	28.76	NO INFO
Raindrop Blue Dream Flower- C35	26.9	NO INFO														Chem #4- C37b	28.82	NO INFO
Veritas Brain OG Flower- C35	26.9	NO INFO														Princess Leia- C18	28.92	NO INFO
Chem Dawg- C5	26.93	NO INFO														Sour Alien- C2	28.96	NO INFO
Angel OG- C2	27	NO INFO														GG #4 (Pre-roll)- C5	29	NO INFO
AJ's bud- C9	27	NO INFO														Blue Dream- C18	29.27	NO INFO
Skywalker OG- C17	27	2.3														White Fire OG Flower- C29	29.5	NO INFO
Golden Goat- C20	27	NO INFO														Sour Alien OG- C18	29.67	NO INFO
Star Killer- C20	27	NO INFO														White Fire OG- C4a	29.68	0
Starfighter- C20	27	NO INFO														White Fire OG- C4b	29.68	0
True OG- C27a	27	NO INFO														White Fire OG- C4c	29.68	0
Cotton Kandy Kush- C27a	27	1														303 Lemons- C14	29.79	0
OG Kush- C27a	27	NO INFO														Chem Dawg- C7	29.8	0
Snurkle- C27a	27	0														Diagonal- C5	29.9	NO INFO
Lucky Charms- C18	27.08	NO INFO														Lemon Sour Diesel- C9	29.9	NO INFO
Lucky Charms- C17	27.1	NO INFO														Ghost Trainwreck Haze #9- C20	30	NO INFO
East Coast Sour Diesel- C4a	27.15	0														Chem 91- C5	30.14	1.33
East Coast Sour Diesel- C4b	27.15	0														Stardaawg- C18	30.2	NO INFO
East Coast Sour Diesel- C4c	27.15	0														Ultra Premium Strain: The White- C8	30.3	0
Veritas Bubba Chem Flower- C35	27.2	NO INFO														OG Kush- C34	30.355	NO INFO
Sour Sunset- C1	27.5	NO INFO														Headband- C2	30.5	NO INFO
Tiger's Milk- C29	27.5	NO INFO														Spec Ops- C37a	30.9	NO INFO
Mighty Tree Super Skunk Flower- C35	27.5	NO INFO														Spec Ops- C37b	30.9	NO INFO
Super Lemon Haze- C12	27.58	NO INFO														Pipe Dream- C9	31	NO INFO
Camband- C37b	27.6	NO INFO														T.R.U.T.H.- C5	31.4	NO INFO
G6 #3- C37a	27.64	NO INFO														Glass Slipper- C2	31.45	NO INFO
Regulator Kush- C2	27.65	NO INFO														Giesel- C2	31.5	No INFO
K Kush- C5	27.74	NO INFO														Bruce Banner- C2	31.8	NO INFO
Goji OG- C12	27.89	0.04														Hound Dawg- C2	32.2	NO INFO
Jack Herer- C5	27.9	NO INFO														ARC- C29	32.5	NO INFO
Colorado Chem- C16	27.94	0														Hell's Angels OG- C18	32.68	NO INFO
Carribean Cooler- C7	28	0														Hybrid (Pre-roll)- C5	33	NO INFO
Cookies and Cream x Purple Punch- C7	28	0														Mighty Tree Blue Dream Flower- C35	33.2	NO INFO
Bubba White- C9	28	NO INFO														Wifi Chem- C17	33.4	1.1
Pura Vida- C29	28	NO INFO														Wifi OG- C17	33.4	1.1
AJ Sour Diesel- C2	28.1	NO INFO														Afghan- C28	35	NO INFO
Special Ops- C33	28.15	NO INFO														Coal Creek Kush- C28	36.4	NO INFO
OG Skywalker- C10	28.2	NO INFO														Black Gold- C28	41	NO INFO
Iron Triangle- C11	28.38	NO INFO														SFV- C28	42	NO INFO
Veritas Kerosene Flower- C35	28.4	NO INFO														Skywalker- C28	55	NO INFO
Kandy Kush- C29	28.5	NO INFO
Lee Roy TK #5- C29	28.5	NO INFO
Louis XIII- C29	28.5	NO INFO
Tahoe OG Kush- C29	28.5	NO INFO
Cookies n Cream- C29	28.5	NO INFO
Stealth Danky Kong Flower- C35	28.6	NO INFO
Legal Haze- C2	28.65	No INFO
Emerald OG- C37a	28.66	NO INFO
Emerald OG- C37b	28.66	NO INFO
Flight- C18	28.76	NO INFO
Chem #4- C37b	28.82	NO INFO
Princess Leia- C18	28.92	NO INFO
Sour Alien- C2	28.96	NO INFO
GG #4 (Pre-roll)- C5	29	NO INFO
Blue Dream- C18	29.27	NO INFO
White Fire OG Flower- C29	29.5	NO INFO
Sour Alien OG- C18	29.67	NO INFO
White Fire OG- C4a	29.68	0
White Fire OG- C4b	29.68	0
White Fire OG- C4c	29.68	0
303 Lemons- C14	29.79	0
Chem Dawg- C7	29.8	0
Diagonal- C5	29.9	NO INFO
Lemon Sour Diesel- C9	29.9	NO INFO
Ghost Trainwreck Haze #9- C20	30	NO INFO
Chem 91- C5	30.14	1.33
Stardaawg- C18	30.2	NO INFO
Ultra Premium Strain: The White- C8	30.3	0
OG Kush- C34	30.355	NO INFO
Headband- C2	30.5	NO INFO
Spec Ops- C37a	30.9	NO INFO
Spec Ops- C37b	30.9	NO INFO
Pipe Dream- C9	31	NO INFO
T.R.U.T.H.- C5	31.4	NO INFO
Glass Slipper- C2	31.45	NO INFO
Giesel- C2	31.5	No INFO
Bruce Banner- C2	31.8	NO INFO
Hound Dawg- C2	32.2	NO INFO
ARC- C29	32.5	NO INFO
Hell's Angels OG- C18	32.68	NO INFO
Hybrid (Pre-roll)- C5	33	NO INFO
Mighty Tree Blue Dream Flower- C35	33.2	NO INFO
Wifi Chem- C17	33.4	1.1
Wifi OG- C17	33.4	1.1
Afghan- C28	35	NO INFO
Coal Creek Kush- C28	36.4	NO INFO
Black Gold- C28	41	NO INFO
SFV- C28	42	NO INFO
Skywalker- C28	55	NO INFO
AVG	21.7183	1.26853			2.21389	15.06			6.75825	10.1029			13.342	3.71125			22.6944	0.216087
SD	5.44414	3.60983			1.50609	3.23688			1.53323	2.8886			1.61245	7.00231			4.06991	0.833293
N	707	285			9	7			20	17			20	8			658	253

## Sheet: Wasington- Med
Strain	THC	CBD		Strain < 5%	THC	CBD		Strain 5 - 10% THC	THC	CBD		Strain 10-15% THC	THC	CBD		Strain > 15% THC	THC	CBD
Harley Tsu- W12	0.3	8.4		Harley Tsu- W12	0.3	8.4		CBD Girl Scout Cookies- W22a	5	15		AK 420 D&S Farms- W16a	10.4	0.5		Dairy Queen Fire Cannabis- W16a	15.1	0.2
Canna-Tsu Liberty Reach- W16a	0.5	20		Canna-Tsu Liberty Reach- W16a	0.5	20		Stephan Hawking Kush- W24	5.3	8.6		Dutch Hawaiian Popcorn- W36	11	NO INFO		Sage & Sour- W39	15.13	0.21
Amazng Grace (Pre-roll)- W23	0.6	8.3		Amazng Grace (Pre-roll)- W23	0.6	8.3		CBD Lilly SPR- W16a	5.6	0.2		Trap Star- W36	11	NO INFO		Chocolate Chunk- American Weed Company- W7a	15.2	0.2
Yummy CBD- W25	0.63	13.69		Yummy CBD- W25	0.63	13.69		Relief CBD Joysticks (Pre-roll)- W23	5.6	No INFO		Ground Flower Bery Mixed- W21a	11.1	0.2		Ace of Spades Forte - W16a	15.2	NO INFO
Critical Mass CBD Preroll-W32	0.64	7.82		Critical Mass CBD Preroll-W32	0.64	7.82		Medi Haze- W24	5.6	12.3		Galactic Glue (Pre-roll)- W37	11.5	0.2		Sensi Star- W6	15.26	NO INFO
Remedy- W25	0.69	14		Remedy- W25	0.69	14		MN- CBD Blue Shark- W28	5.8	8.4		Grape Ape (pre-roll)- W37	11.5	0.2		LA SOUr #14- Seattle's Private Reserve- W7a	15.3	NO INFO
Sour Tsunami High Five Farms- W16a	0.7	13.2		Sour Tsunami High Five Farms- W16a	0.7	13.2		Mango Haze- Artizen- W7a	5.9	6.1		Cinex Pre Roll Landrace- W16a	11.8	NO INFO		Grapefruit x NPH Clandestine- W16a	15.3	NO INFO
AC/DC CBD (Pre-roll)- W23	0.7	15.2		AC/DC CBD (Pre-roll)- W23	0.7	15.2		Roskin Stick- Infsed Pre Roll- W22a	5.9	26		Kiwi Gangster (Pre-roll)- W23	11.98	NO INFO		Green Crack High Five Farms- W16a	15.3	NO INFO
Sour Tsunami- W25	0.7	13.2		Sour Tsunami- W25	0.7	13.2		Rosin Stick- Infused Pre roll- W22a	5.9	26		GG shake- W4a	12	NO INFO		Klingon Preroll 0.5g Soulshine- W16a	15.3	NO INFO
Sour Tsunami High Five Farms- W16a	0.7	13.2		Sour Tsunami High Five Farms- W16a	0.7	13.2		CBD Blue Shark	5.9	10.2		Ground Flower Alpine Mix- W21a	12	0.3		Northern Lights- Hi Guys- W20a	15.3	NO INFO
Yummy CBD- W30	0.75	19		Yummy CBD- W30	0.75	19		Critical Mass Pre Roll- W22a	6	7		GA- Blue Cheese Preroll- W28	12.1	0		Mindscape by Methow Horticulture- W18	15.4	0.1
Amazing Grace- W6	0.77	13.6		Amazing Grace- W6	0.77	13.6		Pre Rolls (CBD) From Panacea- W22a	6	14		Sky Standard Cherry Pie- W9b	12.6	0.5		Star Dawg High Tide Cannabis- W16a	15.4	NO INFO
CBD Canna-Tsu- Liberty Reach- W7a	0.9	23.8		CBD Canna-Tsu- Liberty Reach- W7a	0.9	23.8		Peacemaker- CBD- Cedar Creek- W30	6	9.5		God's Gift Pre-roll- W35	12.6	0.8		Venom Og Kush Pre Roll Soulshine- W16a	15.4	NO INFO
Eagle Trees AC/DC- W9b	0.9	18.8		Eagle Trees AC/DC- W9b	0.9	18.8		Flower Blueberry Haze- W34	6	NO INFO		DJ Short Blueberry by Cascade Growers- W8	12.85	0.16		Midscape- W35	15.4	0.1
Dancehall by Puffin Farm- W8	0.96	20.6		Dancehall by Puffin Farm- W8	0.96	20.6		Cbd Critical Mass- W39	6.38	10.4		Marmalade #32- W22a	13	9		CA- Double Dream- W28	15.49	0.48
ACDC- W25	0.97	16.67		ACDC- W25	0.97	16.67		Hawaiian Dream- W25	6.4	11.2		Fire- Dairy Queen- W9a	13.3	No INFO		Joint Alien Blood (Preroll)- W34	15.5	No INFO
Knights Hemplar- AC/DC- W9a	1	15		Knights Hemplar- AC/DC- W9a	1	15		Shark Shock- Mr. Nice CBD Crew- W30	6.6	16.78		Royal Kush 1g Pre Roll Landrace- W16a	13.3	No INFO		Platinum Girlscout Cookies-W2	15.52	0.11
Liberty Reach- Canna Tsu- W9a	1	25.4		Liberty Reach- Canna Tsu- W9a	1	25.4		CB Damsel Silica- W16a	6.7	11.2		Sweet and Sour Widow- W36	13.3	0.4		Ewok- W24	15.52	No INFO
Treedom- Remedy- W9a	1.2	16.6		Treedom- Remedy- W9a	1.2	16.6		Ferrari Fume #2- W23	7	14		Top Cut- Mandragora- W9a	13.4	NO INFO		Og Kush- W37	15.54	0
Treedom Remedy- W9b	1.2	16.6		Treedom Remedy- W9b	1.2	16.6		CBD- W24	7.15	11.6		Purple AK-47- W25	13.49	NO INFO		Dama- Pink Panther- W9a	15.6	NO INFO
Vodis Doctor Doctor- W9b	2.1	14.9		Vodis Doctor Doctor- W9b	2.1	14.9		Raw Diesel- W37	7.45	11.5		Sunset Sherbert-W2	13.58	0		OMG- Grape Soda OMG- W9a	15.6	NO INFO
CA- The White- W28	2.66	0.24		CA- The White- W28	2.66	0.24		Flower PGSC- W34	7.7	NO INFO		Green Crack Trim- Lopez and Orr- W7a	13.6	0.3		Spark- Bubonic Chronic- W9a	15.6	NO INFO
Joints WiFI OG (Preroll)- W34	2.7	NO INFO		Joints WiFI OG (Preroll)- W34	2.7	NO INFO		Banana Split- W37	7.78	0		Blueberry Cookies- American Weed Company- W7a	13.7	NO INFO		Fruity Pebbles by Okanogan Natural Farms- W18	15.6	0
Harlequin Top Shelf- W16a	2.8	5.7		Harlequin Top Shelf- W16a	2.8	5.7		Critical Mass- Artizen- W7a	7.9	12.9		Spark- Grease Monkey- W9a	13.7	NO INFO		Cherry Cream Pie by Methow Horticulture- W18	15.6	0.1
CBD Yummy- W25	2.8	5.4		CBD Yummy- W25	2.8	5.4		Lily CBD by Lazy Bee Gardens- W8	8	20		Dutch Treat Shake- W4a	14	No INFO		Xj 13 by Cascade Growers- W18	15.6	0.2
Harlequin Top Shelf- W16a	2.8	5.7		Harlequin Top Shelf- W16a	2.8	5.7		Frida by Ravengrass Farms- W8	8	14		Sour Tangie- Solstice Tradition- W7a	14	NO INFO		Cherry Cream Pie- W35	15.6	0.1
Remedy by Puffin Farm- W8	3.24	19.64		Remedy by Puffin Farm- W8	3.24	19.64		Cannatonic 7.0 Red Frog- W16a	8.1	9.6		Remedy- W4b	14	NO INFO		Xj 13- W35	15.6	0.2
Cbd X Gdp by Weed Bush Lovers- W18	3.4	5.9		Cbd X Gdp by Weed Bush Lovers- W18	3.4	5.9		Omrita- W37	8.33	9.49		Kimbo Kush- W4b	14	NO INFO		Fruity Pebbles- W35	15.6	0
Cbd X Gdp- W35	3.4	5.9		Cbd X Gdp- W35	3.4	5.9		Cashy's Honey- W21a	8.4	12.8		Purple Persuasion- W24	14	NO INFO		Blue Magoo- W39	15.64	0.01
CBD 3:1 Durga Mata II -W2	3.57	11.57		CBD 3:1 Durga Mata II -W2	3.57	11.57		Critical Mass Preroll- W33	8.6	14.89		Master Kush Preroll- W32	14	NO INFO		Blue Magoo- W39	15.64	0.01
CBD OG Kush- From the Soil- W7a	3.8	8.7		CBD OG Kush- From the Soil- W7a	3.8	8.7		Sour Diesel Preroll- W35	9.3	0		Juicy Fruit- W21a	14.1	NO INFO		Grapefruit Joint- W39	15.69	0
Aliens on Moonshine by Cascade Gnome- W8	3.92	10.62		Aliens on Moonshine by Cascade Gnome- W8	3.92	10.62		Flower Sour Tsunami- W34	9.4	8.9		Strawbery Switchblade Preroll- W35	14.1	2		Grapefuit Joint- W39	15.69	0
Lilly by Lazy Bee- W18	4	11		Lilly by Lazy Bee- W18	4	11		Dank Sinatra- W36	9.4	NO INFO		CCC- Variety PK Indica- W21a	14.2	NO INFO		Chunkberry Kush- American Weed Company- W7a	15.7	NO INFO
Lilly Cbd by Lazy Bee- W18	4	11		Lilly Cbd by Lazy Bee- W18	4	11		White Fire OG- W36	9.8	NO INFO		Querkle- W37	14.25	0.09		Orange Bubble Gum- Gabriel- W7a	15.7	0.2
Lilly- W35	4	11		Lilly- W35	4	11		Critical Mass (Pre-roll)- W23	9.9	7.7		Marmalade- W1	14.3	10.5		Freedom- Ultra Orange- W9a	15.7	0.4
GSC- W23	4.09	8.7		GSC- W23	4.09	8.7						Eco Budz- Jackie G- W9a	14.3	NO INFO		Artizen- Lemonberry- W9a	15.7	No INFO
CBD Girl Scout Cookies- W36	4.1	8.7		CBD Girl Scout Cookies- W36	4.1	8.7						Berry Gumboldt Pre Roll 1g Landrace- W16a	14.4	NO INFO		Top Cut- Animal Cookies- W9a	15.7	NO INFO
DOH Harlequin- Washington Bud Company- W7a	4.6	7.7		DOH Harlequin- Washington Bud Company- W7a	4.6	7.7						Rude Boi OG- Moji- W7a	14.5	0.7		Aloha Pre Roll Soulshine- W16a	15.7	NO INFO
CBD Dream- W32	4.9	5		CBD Dream- W32	4.9	5						Jack Herer Rochester Light- W16a	14.6	NO INFO		Pot Factory Strawberry Cough- W9b	15.7	NO INFO
CBD Girl Scout Cookies- W22a	5	15										UK Cheese D&S Farms- W16a	14.6	NO INFO		OG Perm-W2	15.76	0.04
Stephan Hawking Kush- W24	5.3	8.6										A-Train Popcorn Suncliff- W16a	14.8	0.6		Platinum Girl Scout Cookie- Nature's Reseve- W7a	15.8	0.1
CBD Lilly SPR- W16a	5.6	0.2										White Widow From Pyraid- W22a	14.8	NO INFO		Top Cut- Cheese- W9a	15.8	NO INFO
Relief CBD Joysticks (Pre-roll)- W23	5.6	No INFO										Knights Hemplar- Kings Kush Little Kings- W9a	14.9	NO INFO		Tutankhamon CG- W16a	15.8	NO INFO
Medi Haze- W24	5.6	12.3								`		Orange Cream by Methow Horticulture- W18	14.9	0.1		Purple Punch- W32	15.8	0.3
MN- CBD Blue Shark- W28	5.8	8.4										Orange Cream- W35	14.9	0.1		Grand Dady Purple by Cascade Growers- W18	15.9	0.1
Mango Haze- Artizen- W7a	5.9	6.1										Green Crack- Lopez and Orr- W7a	15	0.3		Candyland by Cascade Growers- W18	15.9	0.1
Roskin Stick- Infsed Pre Roll- W22a	5.9	26										Blueberry Muffin- Silver Series- W7a	15	NO INFO		Game Changer Pre Roll 0.75 Hemp Kings- W16a	15.9	No INFO
Rosin Stick- Infused Pre roll- W22a	5.9	26										Royal Kush- Lopez and Orr- W7a	15	0.3		Velvet Pie Pre Roll 1g Liberty Reach- W16a	15.9	NO INFO
CBD Blue Shark	5.9	10.2										Cherry Pie- W21a	15	NO INFO		Super Goo 5- Fifty Fold- W20a	15.9	NO INFO
Critical Mass Pre Roll- W22a	6	7										White Fire- W4b	15	NO INFO		HD- Snow Leapard- W28	15.9	0.79
Pre Rolls (CBD) From Panacea- W22a	6	14										MB- Northenr Lights #9- W28	15	0		Rude Boi- W32	15.9	0.03
Peacemaker- CBD- Cedar Creek- W30	6	9.5										Purple Punch- W33	15	0		Fruity Pebbles- W32	15.9	0.46
Flower Blueberry Haze- W34	6	NO INFO														Flower Locktite- W34	15.9	No INFO
Cbd Critical Mass- W39	6.38	10.4														Candyland- W35	15.9	0.1
Hawaiian Dream- W25	6.4	11.2														Grand Daddy Purple- W35	15.9	0.1
Shark Shock- Mr. Nice CBD Crew- W30	6.6	16.78														The Wills- W37	15.91	0.45
CB Damsel Silica- W16a	6.7	11.2														Kritical Kush- W39	15.91	0.17
Ferrari Fume #2- W23	7	14														Skunk 47-W2	15.95	0.04
CBD- W24	7.15	11.6														Where's my bike? Joint- W39	15.95	0
Raw Diesel- W37	7.45	11.5														Green Crack- W1	16	NO INFO
Flower PGSC- W34	7.7	NO INFO														Secret Recipe-W2	16	NO INFO
Banana Split- W37	7.78	0														Dutch-Grapefruit Shake- W4a	16	NO INFO
Critical Mass- Artizen- W7a	7.9	12.9														Lemon OG- W4a	16	NO INFO
Lily CBD by Lazy Bee Gardens- W8	8	20														Alien- W4a	16	NO INFO
Frida by Ravengrass Farms- W8	8	14														Chemmy Jones- W4a	16	NO INFO
Cannatonic 7.0 Red Frog- W16a	8.1	9.6														Sage Treat- W4a	16	NO INFO
Omrita- W37	8.33	9.49														Strawberry Diesel- W6	16	NO INFO
Cashy's Honey- W21a	8.4	12.8														Frostitute- W6	16	NO INFO
Critical Mass Preroll- W33	8.6	14.89														Space Candy- Nature's Reserve- W7a	16	No INFO
Sour Diesel Preroll- W35	9.3	0														Black Betty Pre Rol 1g High Five Farms- W16a	16	NO INFO
Flower Sour Tsunami- W34	9.4	8.9														Lake Of Fire- W21a	16	NO INFO
Dank Sinatra- W36	9.4	NO INFO														Sapphire Scout- W22a	16	NO INFO
White Fire OG- W36	9.8	NO INFO														Lavender- W22a	16	NO INFO
Critical Mass (Pre-roll)- W23	9.9	7.7														Gooberry- W4b	16	NO INFO
AK 420 D&S Farms- W16a	10.4	0.5														Chernobyl- W4b	16	NO INFO
Dutch Hawaiian Popcorn- W36	11	NO INFO														Sage Treat- W4b	16	NO INFO
Trap Star- W36	11	NO INFO														Kauaiian Haze 2pk preroll- W4b	16	NO INFO
Ground Flower Bery Mixed- W21a	11.1	0.2														Cannalope Kush 2pk preroll- W4b	16	NO INFO
Galactic Glue (Pre-roll)- W37	11.5	0.2														White Lotus preroll- W4b	16	NO INFO
Grape Ape (pre-roll)- W37	11.5	0.2														Cherry Pie Preroll- W30	16	NO INFO
Cinex Pre Roll Landrace- W16a	11.8	NO INFO														Cherry Pie Preroll- W30	16	NO INFO
Kiwi Gangster (Pre-roll)- W23	11.98	NO INFO														Blueberry Haze Preroll- W32	16	NO INFO
GG shake- W4a	12	NO INFO														Oregon Diesel- W33	16	0
Ground Flower Alpine Mix- W21a	12	0.3														Dutch Hawaiian Special- W37	16	0.04
GA- Blue Cheese Preroll- W28	12.1	0														Heavenly- W37	16.01	0.13
Sky Standard Cherry Pie- W9b	12.6	0.5														Orange Blossom Kush- W1	16.1	NO INFO
God's Gift Pre-roll- W35	12.6	0.8														9lb Hammer- LBS & OZS- W7a	16.1	NO INFO
DJ Short Blueberry by Cascade Growers- W8	12.85	0.16														CBD Blue Shark Olympia Cannabis- W16a	16.1	11.3
Marmalade #32- W22a	13	9														Girl Scout Cookies Rochester Light- W16a	16.1	NO INFO
Fire- Dairy Queen- W9a	13.3	No INFO														Gorilla Glue #4 High Five Farms- W16a	16.1	NO INFO
Royal Kush 1g Pre Roll Landrace- W16a	13.3	No INFO														Platinum Animal Cookies High Five Farms- W16a	16.1	0.4
Sweet and Sour Widow- W36	13.3	0.4														CBD Blue Shark Pre-Roll 1g Olympia Cannabis - W16a	16.1	11.3
Top Cut- Mandragora- W9a	13.4	NO INFO														Strawberry- W37	16.11	0.22
Purple AK-47- W25	13.49	NO INFO														Blue Dream Joint- W39	16.11	0
Sunset Sherbert-W2	13.58	0														Blue Dream Joint- W39	16.11	0
Green Crack Trim- Lopez and Orr- W7a	13.6	0.3														Lavenddar- Mary Jane Cannabis- W7a	16.2	0.2
Blueberry Cookies- American Weed Company- W7a	13.7	NO INFO														William's Wonder- Dream City- W7a	16.2	NO INFO
Spark- Grease Monkey- W9a	13.7	NO INFO														OG Cannalope Haze High Five Farms- W16a	16.2	0.5
Dutch Treat Shake- W4a	14	No INFO														Raw Dog Pre Roll 1g Sticky Budz- W16a	16.2	0.2
Sour Tangie- Solstice Tradition- W7a	14	NO INFO														N.L. Skunk- W1	16.3	NO INFO
Remedy- W4b	14	NO INFO														Sunny G- Gabriel- W7a	16.3	0.2
Kimbo Kush- W4b	14	NO INFO														Cheese Quake by Lazy Bee- W18	16.3	0.2
Purple Persuasion- W24	14	NO INFO														Mr. Nice x Persian high Five Farms- W16a	16.3	0.7
Master Kush Preroll- W32	14	NO INFO														Sky Standard Cherry Pie Trim- W9b	16.3	0.2
Juicy Fruit- W21a	14.1	NO INFO														MamaCita- Fifty Fold- W20a	16.3	NO INFO
Strawbery Switchblade Preroll- W35	14.1	2														OS- Hollands Hope- W28	16.3	0
CCC- Variety PK Indica- W21a	14.2	NO INFO														Cheese Quake- W35	16.3	0.2
Querkle- W37	14.25	0.09														Cinex Joint- W39	16.32	0
Marmalade- W1	14.3	10.5														Cinex Joint- W39	16.32	0
Eco Budz- Jackie G- W9a	14.3	NO INFO														Akcademics- W23	16.37	NO INFO
Berry Gumboldt Pre Roll 1g Landrace- W16a	14.4	NO INFO														Top Shelf- Purple Lemon Haze Dubshot- W9a	16.4	NO INFO
Rude Boi OG- Moji- W7a	14.5	0.7														Blueberry ABC Farms- W16a	16.4	NO INFO
Jack Herer Rochester Light- W16a	14.6	NO INFO														Jamba Juice High Tide Cannabis- W16a	16.4	NO INFO
UK Cheese D&S Farms- W16a	14.6	NO INFO														Star Widow Popcorn Buds Red Frog- W16a	16.4	NO INFO
A-Train Popcorn Suncliff- W16a	14.8	0.6														Galactic Glue (Pre-roll)- W23	16.4	No INFO
White Widow From Pyraid- W22a	14.8	NO INFO														OG Kush Joint- W39	16.49	0
Knights Hemplar- Kings Kush Little Kings- W9a	14.9	NO INFO														OG Kush Joint- W39	16.49	0
Orange Cream by Methow Horticulture- W18	14.9	0.1														Cherry Sherbert- Private Reserve- W7a	16.5	NO INFO
Orange Cream- W35	14.9	0.1														Sour Diesel by THC Farms- W18	16.5	0.2
Green Crack- Lopez and Orr- W7a	15	0.3														Girl Scout Cookies Rochester Farms- W16a	16.5	NO INFO
Blueberry Muffin- Silver Series- W7a	15	NO INFO														Royal Cherry Pre Roll 1g Royal Cannabis- W16a	16.5	No INFO
Royal Kush- Lopez and Orr- W7a	15	0.3														Stormy D #1- Fifty Fold- W20a	16.5	NO INFO
Cherry Pie- W21a	15	NO INFO														Sour Diesel- W35	16.5	0.2
White Fire- W4b	15	NO INFO														GCG- Kush and Cream- W28	16.59	0
MB- Northenr Lights #9- W28	15	0														OG Kush-W2	16.6	0
Purple Punch- W33	15	0														Purpple Hippy Stash-W2	16.6	0.1
Dairy Queen Fire Cannabis- W16a	15.1	0.2														Huckleberry Pie 7g Shake- W12	16.6	0
Sage & Sour- W39	15.13	0.21														Chernobyl Red Frog- W16a	16.6	NO INFO
Chocolate Chunk- American Weed Company- W7a	15.2	0.2														Vodis Super Silver Haze (Sativa Preroll)- W9b	16.6	1.1
Ace of Spades Forte - W16a	15.2	NO INFO														Bruce Banner- W21a	16.6	NO INFO
Sensi Star- W6	15.26	NO INFO														Aphrodite- W32	16.6	0.18
LA SOUr #14- Seattle's Private Reserve- W7a	15.3	NO INFO														Jack of Sades Kola- W25	16.61	NO INFO
Grapefruit x NPH Clandestine- W16a	15.3	NO INFO														GCG- Amherst Sour Diesel- W28	16.61	0
Green Crack High Five Farms- W16a	15.3	NO INFO														SQ- Chocolate Skunk- W28	16.65	0.02
Klingon Preroll 0.5g Soulshine- W16a	15.3	NO INFO														CiNEX- W37	16.66	0
Northern Lights- Hi Guys- W20a	15.3	NO INFO														Honey Bananas- W37	16.66	0.43
Mindscape by Methow Horticulture- W18	15.4	0.1														LA Sour- Seattle's Private Reserve- W7a	16.7	NO INFO
Star Dawg High Tide Cannabis- W16a	15.4	NO INFO														Uw Purple by Pilot Farms- W18	16.7	0.1
Venom Og Kush Pre Roll Soulshine- W16a	15.4	NO INFO														Ace of Spades Pre Roll 1g Fote- W16a	16.7	NO INFO
Midscape- W35	15.4	0.1														UW Purple- W35	16.7	0.1
CA- Double Dream- W28	15.49	0.48														Blueberry- W39	16.71	0.02
Joint Alien Blood (Preroll)- W34	15.5	No INFO														Cherry Pie- W32	16.76	0
Platinum Girlscout Cookies-W2	15.52	0.11														Chocolope- W1	16.8	NO INFO
Ewok- W24	15.52	No INFO														God Bud- W6	16.8	NO INFO
Og Kush- W37	15.54	0														Barney Rubble- Jackpot Seaweed- W7a	16.8	NO INFO
Dama- Pink Panther- W9a	15.6	NO INFO														Gabriel- Sunny G- W9a	16.8	0.2
OMG- Grape Soda OMG- W9a	15.6	NO INFO														Super Silver Skunk by Okanogan Natural Farms- W18	16.8	0
Spark- Bubonic Chronic- W9a	15.6	NO INFO														Purple Haze by Cascade Growers- W18	16.8	0.1
Fruity Pebbles by Okanogan Natural Farms- W18	15.6	0														Maui Super Dawg Pre Roll 1g Good Pot- W16a	16.8	NO INFO
Cherry Cream Pie by Methow Horticulture- W18	15.6	0.1														Orange Kush Pre Roll 1g Landrace- W16a	16.8	No INFO
Xj 13 by Cascade Growers- W18	15.6	0.2														ART- Fire OG Preroll- W28	16.8	0
Cherry Cream Pie- W35	15.6	0.1														Black Cherry Soda- W32	16.8	0.18
Xj 13- W35	15.6	0.2														Purple Haze- W35	16.8	0.1
Fruity Pebbles- W35	15.6	0														Super Silver Skunk- W35	16.8	0
Blue Magoo- W39	15.64	0.01														Blackberry Dream- W33	16.84	0
Blue Magoo- W39	15.64	0.01														Trainwreck-W2	16.86	0.99
Grapefruit Joint- W39	15.69	0														Chunky Cheese- W1	16.9	NO INFO
Grapefuit Joint- W39	15.69	0														Top Shelf- Dutch Hawaiian- W9a	16.9	NO INFO
Chunkberry Kush- American Weed Company- W7a	15.7	NO INFO														Spark- God Bud- W9a	16.9	NO INFO
Orange Bubble Gum- Gabriel- W7a	15.7	0.2														Gabriel- Orange Bubble Gum- W9a	16.9	0.3
Freedom- Ultra Orange- W9a	15.7	0.4														Sugar Black Rose- W12	16.9	0
Artizen- Lemonberry- W9a	15.7	No INFO														Gas Champer Forte Farms- W16a	16.9	0.5
Top Cut- Animal Cookies- W9a	15.7	NO INFO														Leef White Urcle (Hybrid Preroll)- W9b	16.9	NO INFO
Aloha Pre Roll Soulshine- W16a	15.7	NO INFO														Presidential Kush- Fifty Fold- W20a	16.9	NO INFO
Pot Factory Strawberry Cough- W9b	15.7	NO INFO														Green Crack- W24	16.9	NO INFO
OG Perm-W2	15.76	0.04														Blue Mangoo-W2	16.97	0.06
Platinum Girl Scout Cookie- Nature's Reseve- W7a	15.8	0.1														G7 Dream- W4a	17	NO INFO
Top Cut- Cheese- W9a	15.8	NO INFO														Allen Wrench- W4a	17	NO INFO
Tutankhamon CG- W16a	15.8	NO INFO														Lavender- W4a	17	NO INFO
Purple Punch- W32	15.8	0.3														Lemon Drop- W4a	17	NO INFO
Grand Dady Purple by Cascade Growers- W18	15.9	0.1														Lemon OG- W6	17	NO INFO
Candyland by Cascade Growers- W18	15.9	0.1														Sour Diesel- Forbidden Farms- W7a	17	0.8
Game Changer Pre Roll 0.75 Hemp Kings- W16a	15.9	No INFO														White Widow- Giant- W7a	17	NO INFO
Velvet Pie Pre Roll 1g Liberty Reach- W16a	15.9	NO INFO														White Widow- Gabriel- W7a	17	0.2
Super Goo 5- Fifty Fold- W20a	15.9	NO INFO														Gabriel- Gummo- W9a	17	0.2
HD- Snow Leapard- W28	15.9	0.79														Quality- Amnesia- Bubble Buds- W9a	17	0.2
Rude Boi- W32	15.9	0.03														Pink 2.0 by Pilot Farms- W18	17	0.1
Fruity Pebbles- W32	15.9	0.46														Sour Bubbly Suncliff- W16a	17	NO INFO
Flower Locktite- W34	15.9	No INFO														Knights Hemplar Spell Caster (Sativa Preroll)- W9b	17	NO INFO
Candyland- W35	15.9	0.1														Pot Factory Northern Lights (Indica Preroll)- W9b	17	0.5
Grand Daddy Purple- W35	15.9	0.1														Sage n Sour From Hi Guys- W22a	17	NO INFO
The Wills- W37	15.91	0.45														Galactic Glue #2 From Clandestine- W22a	17	NO INFO
Kritical Kush- W39	15.91	0.17														Honey Bannanas From Hi Guys- W22a	17	NO INFO
Skunk 47-W2	15.95	0.04														Tangie- W4b	17	NO INFO
Where's my bike? Joint- W39	15.95	0														Pineapple- W4b	17	NO INFO
Green Crack- W1	16	NO INFO														The Hog- W4b	17	NO INFO
Secret Recipe-W2	16	NO INFO														Poorman's Dream- W4b	17	NO INFO
Dutch-Grapefruit Shake- W4a	16	NO INFO														Dutch Treat- W4b	17	NO INFO
Lemon OG- W4a	16	NO INFO														Mystic Granny- W4b	17	NO INFO
Alien- W4a	16	NO INFO														U/W Purple- W4b	17	NO INFO
Chemmy Jones- W4a	16	NO INFO														LA Confidential- Freddy's Fuego- W30	17	No INFO
Sage Treat- W4a	16	NO INFO														Jill- W30	17	NO INFO
Strawberry Diesel- W6	16	NO INFO														Orca's Orange- W30	17	NO INFO
Frostitute- W6	16	NO INFO														Middlefork- Triumph- W30	17	NO INFO
Space Candy- Nature's Reserve- W7a	16	No INFO														LA Confidential- Freddy's Fuego- W30	17	No INFO
Black Betty Pre Rol 1g High Five Farms- W16a	16	NO INFO														Jill- W30	17	NO INFO
Lake Of Fire- W21a	16	NO INFO														Orca's Orange- W30	17	NO INFO
Sapphire Scout- W22a	16	NO INFO														Middlefork- Triumph- W30	17	NO INFO
Lavender- W22a	16	NO INFO														Blackberry Cream- W33	17	0
Gooberry- W4b	16	NO INFO														Blue Steel- W33	17	0
Chernobyl- W4b	16	NO INFO														Cheese- W33	17	0
Sage Treat- W4b	16	NO INFO														Pink 2.0- W35	17	0.1
Kauaiian Haze 2pk preroll- W4b	16	NO INFO														White Widow- W36	17	NO INFO
Cannalope Kush 2pk preroll- W4b	16	NO INFO														Tangie Land- W36	17	NO INFO
White Lotus preroll- W4b	16	NO INFO														Tangie- W25	17.01	NO INFO
Cherry Pie Preroll- W30	16	NO INFO														ART- Lemonberry- W28	17.01	0.12
Cherry Pie Preroll- W30	16	NO INFO														Permafrost- W39	17.05	0.2
Blueberry Haze Preroll- W32	16	NO INFO														Super Girl- W6	17.07	NO INFO
Oregon Diesel- W33	16	0														Green Crack- Nature's Reserve- W7a	17.1	NO INFO
Dutch Hawaiian Special- W37	16	0.04														Cherrty Tart- LBS & Ozs- W7a	17.1	NO INFO
Heavenly- W37	16.01	0.13														Jillybean- Sunshine Farms- W7a	17.1	0.2
Orange Blossom Kush- W1	16.1	NO INFO														Orange Kush Quality Cannabis- W16a	17.1	NO INFO
9lb Hammer- LBS & OZS- W7a	16.1	NO INFO														Afgoo- NW Nectar- W20a	17.1	0.5
CBD Blue Shark Olympia Cannabis- W16a	16.1	11.3														Gorilla Cookies- W24	17.1	NO INFO
Girl Scout Cookies Rochester Light- W16a	16.1	NO INFO														SQ- Blackberry Cream- W28	17.1	0.006
Gorilla Glue #4 High Five Farms- W16a	16.1	NO INFO														Purps 1 Shake- W12	17.2	0
Platinum Animal Cookies High Five Farms- W16a	16.1	0.4														Blueberry DJ Short by Cascade Growers- W18	17.2	0.2
CBD Blue Shark Pre-Roll 1g Olympia Cannabis - W16a	16.1	11.3														Pbb X Sss by Okanogan Natural Farms- W18	17.2	0
Strawberry- W37	16.11	0.22														AK-47 by Perma- W18	17.2	0
Blue Dream Joint- W39	16.11	0														Knights Hemplar Frosty Knight (Indica Preroll)- W9b	17.2	NO INFO
Blue Dream Joint- W39	16.11	0														Dutch Treat- Hi Guys- W20a	17.2	0.3
Lavenddar- Mary Jane Cannabis- W7a	16.2	0.2														UW by Mother Earth- W32	17.2	1.4
William's Wonder- Dream City- W7a	16.2	NO INFO														Blueberry Haze- W32	17.2	0.7
OG Cannalope Haze High Five Farms- W16a	16.2	0.5														Blueberry Dj Short- W35	17.2	0.2
Raw Dog Pre Roll 1g Sticky Budz- W16a	16.2	0.2														Pbb X Sss- W35	17.2	0
N.L. Skunk- W1	16.3	NO INFO														Sour Diesel- W39	17.2	0.12
Sunny G- Gabriel- W7a	16.3	0.2														Sour Diesel- W39	17.2	0.12
Cheese Quake by Lazy Bee- W18	16.3	0.2														Suck It! (pre-roll)- W37	17.24	0.6
Mr. Nice x Persian high Five Farms- W16a	16.3	0.7														The Pineapple- W33	17.26	0.05
Sky Standard Cherry Pie Trim- W9b	16.3	0.2														Mendo Breath-W2	17.28	0
MamaCita- Fifty Fold- W20a	16.3	NO INFO														Superstar- W32	17.28	0
OS- Hollands Hope- W28	16.3	0														Blueberry Diesel- W1	17.3	NO INFO
Cheese Quake- W35	16.3	0.2														Blue Dream by Cascade Growers- W18	17.3	0.1
Cinex Joint- W39	16.32	0														707 Headband SPR- W16a	17.3	NO INFO
Cinex Joint- W39	16.32	0														Sunberry High Five Farms- W16a	17.3	0.2
Akcademics- W23	16.37	NO INFO														Flower Blueberry Cheesecake- W34	17.3	NO INFO
Top Shelf- Purple Lemon Haze Dubshot- W9a	16.4	NO INFO														Blue Dream- W35	17.3	0.1
Blueberry ABC Farms- W16a	16.4	NO INFO														Ewok- W23	17.34	No INFO
Jamba Juice High Tide Cannabis- W16a	16.4	NO INFO														Cher-Willie- W23	17.36	NO INFO
Star Widow Popcorn Buds Red Frog- W16a	16.4	NO INFO														Snoop's Dream- W1	17.4	NO INFO
Galactic Glue (Pre-roll)- W23	16.4	No INFO														XJ-13- W1	17.4	NO INFO
OG Kush Joint- W39	16.49	0														Fruity Pebbles- Solstice Tradition- W7a	17.4	NO INFO
OG Kush Joint- W39	16.49	0														Soulshine- Ewok- W9a	17.4	NO INFO
Cherry Sherbert- Private Reserve- W7a	16.5	NO INFO														GG4 by Cascade Growers- W18	17.4	0.2
Sour Diesel by THC Farms- W18	16.5	0.2														Headband by perma- W18	17.4	0
Girl Scout Cookies Rochester Farms- W16a	16.5	NO INFO														Cherry #10 Fire Cannabis- W16a	17.4	NO INFO
Royal Cherry Pre Roll 1g Royal Cannabis- W16a	16.5	No INFO														Sweet Cheese Root Down- W16a	17.4	0.2
Stormy D #1- Fifty Fold- W20a	16.5	NO INFO														Snow Leapord- W32	17.4	0.14
Sour Diesel- W35	16.5	0.2														Headband- W35	17.4	0
GCG- Kush and Cream- W28	16.59	0														Double Dream Preroll- W35	17.4	0
OG Kush-W2	16.6	0														Headband Pre-roll- W35	17.4	0
Purpple Hippy Stash-W2	16.6	0.1														Grandaddy Purple- W32	17.41	0.04
Huckleberry Pie 7g Shake- W12	16.6	0														Sunset Sherbet- W37	17.44	0
Chernobyl Red Frog- W16a	16.6	NO INFO														Pineapple Kush- Silver Series- W7a	17.5	0.4
Vodis Super Silver Haze (Sativa Preroll)- W9b	16.6	1.1														Mendo Breath Jackpot Seaweed- W16a	17.5	NO INFO
Bruce Banner- W21a	16.6	NO INFO														Pot Factory GDP- W9b	17.5	1.5
Aphrodite- W32	16.6	0.18														Chocolate Chunk- W25	17.5	NO INFO
Jack of Sades Kola- W25	16.61	NO INFO														ART- Dutchberry Preroll- W28	17.5	0.25
GCG- Amherst Sour Diesel- W28	16.61	0														Crockett Confidenial Preroll- W35	17.5	0
SQ- Chocolate Skunk- W28	16.65	0.02														Mendo breath-W2	17.54	0
CiNEX- W37	16.66	0														Sour Diesel- W25	17.55	NO INFO
Honey Bananas- W37	16.66	0.43														Carl Sagan- W32	17.56	0.14
LA Sour- Seattle's Private Reserve- W7a	16.7	NO INFO														OZ Kush- Exotikz- W7a	17.6	0.3
Uw Purple by Pilot Farms- W18	16.7	0.1														Pineapple Chunk ABC Farms- W16a	17.6	NO INFO
Ace of Spades Pre Roll 1g Fote- W16a	16.7	NO INFO														SPP Blue Cinex (Sativa Preroll)- W9b	17.6	0.5
UW Purple- W35	16.7	0.1														Knights Hemplar Kings Kush (Indica Preroll)- W9b	17.6	NO INFO
Blueberry- W39	16.71	0.02														Pineapple Express- W23	17.6	NO INFO
Cherry Pie- W32	16.76	0														Blue Bird- W24	17.6	NO INFO
Chocolope- W1	16.8	NO INFO														MILF- W25	17.6	NO INFO
God Bud- W6	16.8	NO INFO														Bubba Kush- W2	17.61	0.13
Barney Rubble- Jackpot Seaweed- W7a	16.8	NO INFO														Strawberry Diesel by Lazy Bee Gardens- W8	17.61	0.12
Gabriel- Sunny G- W9a	16.8	0.2														RYO Blueberry- W1	17.62	NO INFO
Super Silver Skunk by Okanogan Natural Farms- W18	16.8	0														Base Camp (Pre-roll)- W23	17.63	NO INFO
Purple Haze by Cascade Growers- W18	16.8	0.1														Cherry Pie- W32	17.69	0
Maui Super Dawg Pre Roll 1g Good Pot- W16a	16.8	NO INFO														Plushberry- W1	17.7	NO INFO
Orange Kush Pre Roll 1g Landrace- W16a	16.8	No INFO														Lodi Dodi-W2	17.7	0.16
ART- Fire OG Preroll- W28	16.8	0														Critical Kush- Gabriel- W7a	17.7	0.2
Black Cherry Soda- W32	16.8	0.18														Top Shelf- Dutch Berry DubShot- W9a	17.7	NO INFO
Purple Haze- W35	16.8	0.1														Pineapple Express ABC Farms- W16a	17.7	NO INFO
Super Silver Skunk- W35	16.8	0														Maui Waui- W21a	17.7	NO INFO
Blackberry Dream- W33	16.84	0														Gorilla Glue #4- W21a	17.7	NO INFO
Trainwreck-W2	16.86	0.99														Wi-Fi PreRoll- W25	17.7	NO INFO
Chunky Cheese- W1	16.9	NO INFO														CB- Cinex- W28	17.7	0
Top Shelf- Dutch Hawaiian- W9a	16.9	NO INFO														OS- Cherry Pie- W28	17.7	0
Spark- God Bud- W9a	16.9	NO INFO														Joint Dutch Treat (Preroll)- W34	17.7	NO INFO
Gabriel- Orange Bubble Gum- W9a	16.9	0.3														Cosmic Dog- W37	17.7	0.1
Sugar Black Rose- W12	16.9	0														Galactic Glue Preroll- W33	17.72	0
Gas Champer Forte Farms- W16a	16.9	0.5														RYO Blackberry Kush- W1	17.74	NO INFO
Leef White Urcle (Hybrid Preroll)- W9b	16.9	NO INFO														Top Shelf- Dutch Treat DubShot- W9a	17.8	NO INFO
Presidential Kush- Fifty Fold- W20a	16.9	NO INFO														Blue Dream Popcorn Buds Artizen- W16a	17.8	NO INFO
Green Crack- W24	16.9	NO INFO														Dr. Who Clandestine- W16a	17.8	NO INFO
Blue Mangoo-W2	16.97	0.06														Lemonberry Popcorn Buds Artizen- W16a	17.8	0.3
G7 Dream- W4a	17	NO INFO														Platinum UW Popcorn Buds Red Frog- W16a	17.8	NO INFO
Allen Wrench- W4a	17	NO INFO														Rude Boi OG Forte- W16a	17.8	0.6
Lavender- W4a	17	NO INFO														Phat Panda Seattle (Hybrid Preroll)- W9b	17.8	0.3
Lemon Drop- W4a	17	NO INFO														ART Gooberry- W28	17.8	0.36
Lemon OG- W6	17	NO INFO														ART- Lemonberry Preroll- W28	17.8	0.01
Sour Diesel- Forbidden Farms- W7a	17	0.8														Gooberry- Preroll- W33	17.8	0
White Widow- Giant- W7a	17	NO INFO														Flower Elevated Islander- W34	17.8	NO INFO
White Widow- Gabriel- W7a	17	0.2														Purple Gorilla- W37	17.81	0.06
Gabriel- Gummo- W9a	17	0.2														$3 Joint (pre-roll)- W37	17.81	0.06
Quality- Amnesia- Bubble Buds- W9a	17	0.2														Birthday Cake- W32	17.86	0.13
Pink 2.0 by Pilot Farms- W18	17	0.1														Mr. Nice - W6	17.89	NO INFO
Sour Bubbly Suncliff- W16a	17	NO INFO														Venom Og by Perma- W18	17.9	0.3
Knights Hemplar Spell Caster (Sativa Preroll)- W9b	17	NO INFO														Garlic Glue High Tide Cannabis- W16a	17.9	NO INFO
Pot Factory Northern Lights (Indica Preroll)- W9b	17	0.5														Girl Scout Cookies Hemp Kings- W16a	17.9	NO INFO
Sage n Sour From Hi Guys- W22a	17	NO INFO														Gooberry Pre Roll 1g Artizen- W16a	17.9	NO INFO
Galactic Glue #2 From Clandestine- W22a	17	NO INFO														Romulan Pre Roll 1g Root Down- W16a	17.9	0.3
Honey Bannanas From Hi Guys- W22a	17	NO INFO														The Purps Pre Roll 1g Root Down- W16a	17.9	NO INFO
Tangie- W4b	17	NO INFO														JPSW Velvet Pie- W9b	17.9	NO INFO
Pineapple- W4b	17	NO INFO														Pitbull Shake- W21a	17.9	NO INFO
The Hog- W4b	17	NO INFO														FK- Afghani- W28	17.9	0
Poorman's Dream- W4b	17	NO INFO														Venom Og- W35	17.9	0.3
Dutch Treat- W4b	17	NO INFO														Purple Lemon Haze Preroll- W35	17.9	0.8
Mystic Granny- W4b	17	NO INFO														Venom OG Preroll- W35	17.9	0.1
U/W Purple- W4b	17	NO INFO														False Teeth-W36	17.9	NO INFO
LA Confidential- Freddy's Fuego- W30	17	No INFO														Blueberry Headband Joint- W39	17.92	0.68
Jill- W30	17	NO INFO														Columbian Gold- W23	17.99	NO INFO
Orca's Orange- W30	17	NO INFO														CA- Holy Trinity- W28	17.99	0.83
Middlefork- Triumph- W30	17	NO INFO														Permafrost- W1	18	NO INFO
LA Confidential- Freddy's Fuego- W30	17	No INFO														Gobbily Goo- W4a	18	NO INFO
Jill- W30	17	NO INFO														Harlequin/Sour Banana Sherbert- W4a	18	3
Orca's Orange- W30	17	NO INFO														Lemon OG- W4a	18	NO INFO
Middlefork- Triumph- W30	17	NO INFO														Purple Champagne- W4a	18	NO INFO
Blackberry Cream- W33	17	0														Cinex- W4a	18	NO INFO
Blue Steel- W33	17	0														Citrus Berry- W4a	18	NO INFO
Cheese- W33	17	0														Snow Monster- W4a	18	NO INFO
Pink 2.0- W35	17	0.1														Orange Creamsicle- W4a	18	NO INFO
White Widow- W36	17	NO INFO														Agent Orange- W4a	18	NO INFO
Tangie Land- W36	17	NO INFO														Kimbo Kush- W4a	18	NO INFO
Tangie- W25	17.01	NO INFO														Chemmy Jones- W4a	18	NO INFO
ART- Lemonberry- W28	17.01	0.12														Prizm- Marley Natural- W7a	18	0.7
Permafrost- W39	17.05	0.2														Quality- Nightmare OG- W9a	18	NO INFO
Super Girl- W6	17.07	NO INFO														Dama- White Russian- W9a	18	0.6
Green Crack- Nature's Reserve- W7a	17.1	NO INFO														Quality- Nightmare OG- Bubble- W9a	18	No INFO
Cherrty Tart- LBS & Ozs- W7a	17.1	NO INFO														Quality- Nightmare OG bubble buds- W9a	18	NO INFO
Jillybean- Sunshine Farms- W7a	17.1	0.2														Fruity Pebbles- W12	18	0
Orange Kush Quality Cannabis- W16a	17.1	NO INFO														Jesus Og Kush by Pilot Farms- W18	18	0.2
Afgoo- NW Nectar- W20a	17.1	0.5														Bay Dream by Binx Buds- W18	18	0.9
Gorilla Cookies- W24	17.1	NO INFO														Powder Hound Lazy Bee- W16a	18	NO INFO
SQ- Blackberry Cream- W28	17.1	0.006														Shiskabery Slica- W16a	18	4.4
Purps 1 Shake- W12	17.2	0														Platinum Animal Cookies Pre Roll 1g High Five - W16a	18	1
Blueberry DJ Short by Cascade Growers- W18	17.2	0.2														Cascade Crest Purple Urkle- W9b	18	No INFO
Pbb X Sss by Okanogan Natural Farms- W18	17.2	0														Sour Diesel- Hi Guys- W20a	18	NO INFO
AK-47 by Perma- W18	17.2	0														Cactus Kief Cone (Pre-roll)- W21a	18	NO INFO
Knights Hemplar Frosty Knight (Indica Preroll)- W9b	17.2	NO INFO														Cornito Budder- W22a	18	NO INFO
Dutch Treat- Hi Guys- W20a	17.2	0.3														Mango Durban- W22a	18	NO INFO
UW by Mother Earth- W32	17.2	1.4														Santa Marta Purple- W22a	18	NO INFO
Blueberry Haze- W32	17.2	0.7														Shurman #7- W22a	18	6
Blueberry Dj Short- W35	17.2	0.2														Velvet Hammer- W22a	18	NO INFO
Pbb X Sss- W35	17.2	0														Honey Cone CBD- W22a	18	27
Sour Diesel- W39	17.2	0.12														La Cubana Cigars from Prohibition Brands- W22a	18	NO INFO
Sour Diesel- W39	17.2	0.12														Agent Orange- W4b	18	NO INFO
Suck It! (pre-roll)- W37	17.24	0.6														White Lotus- W4b	18	NO INFO
The Pineapple- W33	17.26	0.05														Lemon Drop- W4b	18	NO INFO
Mendo Breath-W2	17.28	0														Cherry Pie Shake bag- W4b	18	NO INFO
Superstar- W32	17.28	0														AC/DC- W4b	18	7
Blueberry Diesel- W1	17.3	NO INFO														AC/DC- W4b	18	1.8
Blue Dream by Cascade Growers- W18	17.3	0.1														Boss Banner 2 pk preroll- W4b	18	NO INFO
707 Headband SPR- W16a	17.3	NO INFO														Goji OG preroll- W4b	18	NO INFO
Sunberry High Five Farms- W16a	17.3	0.2														Salmon Berry- W24	18	NO INFO
Flower Blueberry Cheesecake- W34	17.3	NO INFO														Root Beer Float- W24	18	NO INFO
Blue Dream- W35	17.3	0.1														Medijuana PreRoll- W25	18	NO INFO
Ewok- W23	17.34	No INFO														Skunk 47 PreRoll- W25	18	No INFO
Cher-Willie- W23	17.36	NO INFO														ART- LA Con Preroll- W28	18	0
Snoop's Dream- W1	17.4	NO INFO														F%@#ing Incredible- W30	18	NO INFO
XJ-13- W1	17.4	NO INFO														Lavender- W30	18	NO INFO
Fruity Pebbles- Solstice Tradition- W7a	17.4	NO INFO														Primo Popcorn- Flubber- W30	18	NO INFO
Soulshine- Ewok- W9a	17.4	NO INFO														Chemmy Jones- Freddy's Fuego- W30	18	NO INFO
GG4 by Cascade Growers- W18	17.4	0.2														Sunset Sherbet- Freddy's Fuego- W30	18	NO INFO
Headband by perma- W18	17.4	0														F%@#ing Incredible- W30	18	NO INFO
Cherry #10 Fire Cannabis- W16a	17.4	NO INFO														Lavender- W30	18	NO INFO
Sweet Cheese Root Down- W16a	17.4	0.2														Primo Popcorn- Flubber- W30	18	NO INFO
Snow Leapord- W32	17.4	0.14														Chemmy Jones- Freddy's Fuego- W30	18	NO INFO
Headband- W35	17.4	0														Sunset Sherbet- Freddy's Fuego- W30	18	NO INFO
Double Dream Preroll- W35	17.4	0														Purple Champagne- W33	18	0
Headband Pre-roll- W35	17.4	0														Bay Dream- W35	18	0.9
Grandaddy Purple- W32	17.41	0.04														Jesus OG Kush- W35	18	0.2
Sunset Sherbet- W37	17.44	0														Pineapple Hammer- W36	18	NO INFO
Pineapple Kush- Silver Series- W7a	17.5	0.4														WOC-W2	18.05	1.03
Mendo Breath Jackpot Seaweed- W16a	17.5	NO INFO														ART- Sour Diesel- W28	18.05	0.62
Pot Factory GDP- W9b	17.5	1.5														Santa Marta Purple- W25	18.08	NO INFO
Chocolate Chunk- W25	17.5	NO INFO														Pineapple Express-W2	18.1	0
ART- Dutchberry Preroll- W28	17.5	0.25														Blue Mangoo- Forbidden Farms- W7a	18.1	NO INFO
Crockett Confidenial Preroll- W35	17.5	0														Mendo Breath- Jackpot Seaweed- W7a	18.1	NO INFO
Mendo breath-W2	17.54	0														Top Cut- Green Crack- W9a	18.1	NO INFO
Sour Diesel- W25	17.55	NO INFO														Eco Budz- 9# Hammer- W9a	18.1	NO INFO
Carl Sagan- W32	17.56	0.14														Platinum Super Glue High Tide Cannabis- W16a	18.1	NO INFO
OZ Kush- Exotikz- W7a	17.6	0.3														PurpleOG #5 Suncliff- W16a	18.1	0.2
Pineapple Chunk ABC Farms- W16a	17.6	NO INFO														Snowdawg Pre Roll 1g Root Down- W16a	18.1	No INFO
SPP Blue Cinex (Sativa Preroll)- W9b	17.6	0.5														The Cake Pre Roll Cannaman Farms- W16a	18.1	0.2
Knights Hemplar Kings Kush (Indica Preroll)- W9b	17.6	NO INFO														Allen Wrench- Artizen- - W20a	18.1	NO INFO
Pineapple Express- W23	17.6	NO INFO														Dutch Berry- Artizen- W20a	18.1	No INFO
Blue Bird- W24	17.6	NO INFO														OS- Black Cherry Soda- W28	18.1	0
MILF- W25	17.6	NO INFO														Skywalker Preroll- W35	18.1	0
Bubba Kush- W2	17.61	0.13														Banana Kush- W39	18.12	0.09
Strawberry Diesel by Lazy Bee Gardens- W8	17.61	0.12														Banana Kush- W39	18.12	0.09
RYO Blueberry- W1	17.62	NO INFO														SQ- Blueberry Headband- W28	18.13	0.11
Base Camp (Pre-roll)- W23	17.63	NO INFO														Maui Waui- W2	18.14	0.07
Cherry Pie- W32	17.69	0														AK-47- W6	18.16	NO INFO
Plushberry- W1	17.7	NO INFO														Jack Herer- W1	18.2	NO INFO
Lodi Dodi-W2	17.7	0.16														Alien Orange Gum- Gabriel- W7a	18.2	0.2
Critical Kush- Gabriel- W7a	17.7	0.2														Jet Fuel- Seattle's Private Reserve- W7a	18.2	NO INFO
Top Shelf- Dutch Berry DubShot- W9a	17.7	NO INFO														Blue Magoo Cannaman Farms- W16a	18.2	NO INFO
Pineapple Express ABC Farms- W16a	17.7	NO INFO														Dawg Walker Buddha- W16a	18.2	NO INFO
Maui Waui- W21a	17.7	NO INFO														Vortex Fire Cannabis- W16a	18.2	NO INFO
Gorilla Glue #4- W21a	17.7	NO INFO														Vortex Viva - W16a	18.2	NO INFO
Wi-Fi PreRoll- W25	17.7	NO INFO														Strawberry Cream 1g Pre Roll Landrace- W16a	18.2	NO INFO
CB- Cinex- W28	17.7	0														Granddaddy Purple- Phat Panda- W20a	18.2	0.2
OS- Cherry Pie- W28	17.7	0														Black Cherry OG (Pre-roll)- W23	18.2	NO INFO
Joint Dutch Treat (Preroll)- W34	17.7	NO INFO														Lavender Jones Popcorn Buds- W25	18.2	NO INFO
Cosmic Dog- W37	17.7	0.1														OG Ringo- W25	18.2	NO INFO
Galactic Glue Preroll- W33	17.72	0														RW- Bubba Crack- W28	18.2	0
RYO Blackberry Kush- W1	17.74	NO INFO														Cannalope Kush Preroll- W33	18.2	2
Top Shelf- Dutch Treat DubShot- W9a	17.8	NO INFO														Key Lime Pie- W36	18.2	NO INFO
Blue Dream Popcorn Buds Artizen- W16a	17.8	NO INFO														Purple Trainwreck- W24	18.215	NO INFO
Dr. Who Clandestine- W16a	17.8	NO INFO														Wonkavator- W33	18.22	0
Lemonberry Popcorn Buds Artizen- W16a	17.8	0.3														Mimosa- W37	18.22	0.08
Platinum UW Popcorn Buds Red Frog- W16a	17.8	NO INFO														Corinto Budder- W25	18.25	No INFO
Rude Boi OG Forte- W16a	17.8	0.6														Cotton Candy Kush- W25	18.25	No INFO
Phat Panda Seattle (Hybrid Preroll)- W9b	17.8	0.3														Corinto Budder PreRolls- W25	18.25	NO INFO
ART Gooberry- W28	17.8	0.36														Blueberry- W24	18.255	NO INFO
ART- Lemonberry Preroll- W28	17.8	0.01														Allen Wrench- Artizen- W7a	18.3	NO INFO
Gooberry- Preroll- W33	17.8	0														Chernobyl- Forbidden Farms- W7a	18.3	NO INFO
Flower Elevated Islander- W34	17.8	NO INFO														G-cut- Seattle's Private Reserve- W7a	18.3	NO INFO
Purple Gorilla- W37	17.81	0.06														Eco Budz- Dutch Hawaiian- W9a	18.3	NO INFO
$3 Joint (pre-roll)- W37	17.81	0.06														Jack of Spades by Lazy Bee- W18	18.3	0.7
Birthday Cake- W32	17.86	0.13														Jack of Spades by The Lazy Bee Gardens- W18	18.3	0.7
Mr. Nice - W6	17.89	NO INFO														Firewalker OG Buddha- W16a	18.3	NO INFO
Venom Og by Perma- W18	17.9	0.3														Optimus Prime Dream City- W16a	18.3	0.3
Garlic Glue High Tide Cannabis- W16a	17.9	NO INFO														Gooberry Pre Roll 0.5g Artizen- W16a	18.3	NO INFO
Girl Scout Cookies Hemp Kings- W16a	17.9	NO INFO														Pink Lemonad Pre Roll 1g High Five Farms- W16a	18.3	No INFO
Gooberry Pre Roll 1g Artizen- W16a	17.9	NO INFO														Sweet Cheese Pre Roll 1g Root Down- W16a	18.3	NO INFO
Romulan Pre Roll 1g Root Down- W16a	17.9	0.3														Plushberry- W24	18.3	NO INFO
The Purps Pre Roll 1g Root Down- W16a	17.9	NO INFO														Space Queen Preroll- W32	18.3	0.29
JPSW Velvet Pie- W9b	17.9	NO INFO														Jack Of Spades- W35	18.3	0.7
Pitbull Shake- W21a	17.9	NO INFO														Santa Marta Purple- W2	18.31	1.98
FK- Afghani- W28	17.9	0														Cherry Pie- W25	18.385	NO INFO
Venom Og- W35	17.9	0.3														Kiona Gold-W2	18.39	0.52
Purple Lemon Haze Preroll- W35	17.9	0.8														Sunset Sherbert- W1	18.4	NO INFO
Venom OG Preroll- W35	17.9	0.1														Hollywood OG- Seattle's Private Reserve- W7a	18.4	NO INFO
False Teeth-W36	17.9	NO INFO														Allen Wrench Popcorn Buds Artizen- W16a	18.4	NO INFO
Blueberry Headband Joint- W39	17.92	0.68														Grape Ape Artizen- W16a	18.4	NO INFO
Columbian Gold- W23	17.99	NO INFO														J-1 Red Frog- W16a	18.4	NO INFO
CA- Holy Trinity- W28	17.99	0.83														The Pineapple Popcorn Buds Artizen- W16a	18.4	0.3
Permafrost- W1	18	NO INFO														Querkle Pre Roll 1g Root Down- W16a	18.4	0.4
Gobbily Goo- W4a	18	NO INFO														Frank's Gift- W21a	18.4	13.9
Harlequin/Sour Banana Sherbert- W4a	18	3														Sweet Cheese (Pre-roll)- W23	18.4	No INFO
Lemon OG- W4a	18	NO INFO														HD- Afgooey- W28	18.4	0.04
Purple Champagne- W4a	18	NO INFO														Flower Skunk- W34	18.4	No INFO
Cinex- W4a	18	NO INFO														Joint Northern Lights (Preroll)- W34	18.4	NO INFO
Citrus Berry- W4a	18	NO INFO														Blue Dream- W37	18.4	0.4
Snow Monster- W4a	18	NO INFO														The Black Joint (pre-roll)- W37	18.43	0.07
Orange Creamsicle- W4a	18	NO INFO														Cannalope- W33	18.44	0
Agent Orange- W4a	18	NO INFO														The Pineapple- W37	18.44	0.32
Kimbo Kush- W4a	18	NO INFO														ART- The Pineapple Preroll- W28	18.47	0.014
Chemmy Jones- W4a	18	NO INFO														Blue Dream- Liberty Reach- W7a	18.5	NO INFO
Prizm- Marley Natural- W7a	18	0.7														Lemon Sweet Skunk- Sunshine Farms- W7a	18.5	NO INFO
Quality- Nightmare OG- W9a	18	NO INFO														DJ Short Blueberry- Dutchy- W7a	18.5	NO INFO
Dama- White Russian- W9a	18	0.6														Albert Walker- Dream City- W7a	18.5	NO INFO
Quality- Nightmare OG- Bubble- W9a	18	No INFO														Cookie Wreck- Sunshine Farms- W7a	18.5	NO INFO
Quality- Nightmare OG bubble buds- W9a	18	NO INFO														Mt Grown Kush- Firebros- W7a	18.5	NO INFO
Fruity Pebbles- W12	18	0														Bay Dream- W12	18.5	0
Jesus Og Kush by Pilot Farms- W18	18	0.2														R 18 Og by the THC Farms- W18	18.5	0
Bay Dream by Binx Buds- W18	18	0.9														Granola Funk Pre Roll 0.5g Liberty Reach- W16a	18.5	NO INFO
Powder Hound Lazy Bee- W16a	18	NO INFO														Mamacita- Fifty Fold- W20a	18.5	NO INFO
Shiskabery Slica- W16a	18	4.4														Orange Kus- W23	18.5	NO INFO
Platinum Animal Cookies Pre Roll 1g High Five - W16a	18	1														CB- Hawaiian- W28	18.5	0
Cascade Crest Purple Urkle- W9b	18	No INFO														BUDDHA Purple Kush Preroll- W28	18.5	0
Sour Diesel- Hi Guys- W20a	18	NO INFO														Critical Kush- W32	18.5	0.09
Cactus Kief Cone (Pre-roll)- W21a	18	NO INFO														Flower Spell Caster- W34	18.5	NO INFO
Cornito Budder- W22a	18	NO INFO														R 18 Og- W35	18.5	0
Mango Durban- W22a	18	NO INFO														Silver Tip- W36	18.5	NO INFO
Santa Marta Purple- W22a	18	NO INFO														Super Lemon Haze- W37	18.5	0.4
Shurman #7- W22a	18	6														Mimosa- W37	18.5	0.1
Velvet Hammer- W22a	18	NO INFO														Cookies and Cream- W1	18.52	NO INFO
Honey Cone CBD- W22a	18	27														GCG- Alpenglow- W28	18.53	0
La Cubana Cigars from Prohibition Brands- W22a	18	NO INFO														Green Crack- W37	18.55	0
Agent Orange- W4b	18	NO INFO														Blue Afghani (pre-roll)- W37	18.55	0.04
White Lotus- W4b	18	NO INFO														Purple OG (Pre-roll)- W23	18.56	NO INFO
Lemon Drop- W4b	18	NO INFO														Obama Kush- W24	18.585	NO INFO
Cherry Pie Shake bag- W4b	18	NO INFO														Bay Dream- W12	18.59	0
AC/DC- W4b	18	7														Blue Dream- Artizen- W7a	18.6	NO INFO
AC/DC- W4b	18	1.8														Elmer's Glue- Firebros- W7a	18.6	NO INFO
Boss Banner 2 pk preroll- W4b	18	NO INFO														Top Cut- Pink Candy Flower- W9a	18.6	NO INFO
Goji OG preroll- W4b	18	NO INFO														Berry White C&D- W16a	18.6	NO INFO
Salmon Berry- W24	18	NO INFO														G13 Buddha- W16a	18.6	NO INFO
Root Beer Float- W24	18	NO INFO														Tangerine Dream Buddha- W16a	18.6	No INFO
Medijuana PreRoll- W25	18	NO INFO														Tahoe OG Pre Roll 1g Root Down- W16a	18.6	NO INFO
Skunk 47 PreRoll- W25	18	No INFO														Larry OG- W21a	18.6	NO INFO
ART- LA Con Preroll- W28	18	0														BUDDHA- Sour Patch Kiss Preroll- W28	18.6	0
F%@#ing Incredible- W30	18	NO INFO														Carl Sagan- W32	18.6	0.15
Lavender- W30	18	NO INFO														Flower Medieval Diesel- W34	18.6	NO INFO
Primo Popcorn- Flubber- W30	18	NO INFO														Sour Diesel Preroll- W35	18.6	0.1
Chemmy Jones- Freddy's Fuego- W30	18	NO INFO														Souwa Grapes- W36	18.6	0.9
Sunset Sherbet- Freddy's Fuego- W30	18	NO INFO														Souwa Grapes- W36	18.6	0.9
F%@#ing Incredible- W30	18	NO INFO														White Tahoe Cookies- W37	18.63	0.13
Lavender- W30	18	NO INFO														Cookies N Cream- W32	18.67	0.13
Primo Popcorn- Flubber- W30	18	NO INFO														Black Afghan- Treehawk Farms- W7a	18.7	NO INFO
Chemmy Jones- Freddy's Fuego- W30	18	NO INFO														Blueberry- Final Frontier- W7a	18.7	2
Sunset Sherbet- Freddy's Fuego- W30	18	NO INFO														Purps 1- Tech Bud- W7a	18.7	NO INFO
Purple Champagne- W33	18	0														Cherry Sherbert- Private Reserve- W7a	18.7	NO INFO
Bay Dream- W35	18	0.9														Fire- Trainwreck- W9a	18.7	0.2
Jesus OG Kush- W35	18	0.2														Platinum Og Kush by Pilot Farms- W18	18.7	0.2
Pineapple Hammer- W36	18	NO INFO														Tropic Thunder by Pilot Farms- W18	18.7	0.2
WOC-W2	18.05	1.03														White Fire Og by Perma- W18	18.7	1.2
ART- Sour Diesel- W28	18.05	0.62														Dutch Berry Artizen- W16a	18.7	NO INFO
Santa Marta Purple- W25	18.08	NO INFO														Treedom Chernobyl- W9b	18.7	NO INFO
Pineapple Express-W2	18.1	0														Brainwreck- W21a	18.7	NO INFO
Blue Mangoo- Forbidden Farms- W7a	18.1	NO INFO														ART- Gooberry Preroll- W28	18.7	0.01
Mendo Breath- Jackpot Seaweed- W7a	18.1	NO INFO														Allen Wrench Preroll- W33	18.7	0
Top Cut- Green Crack- W9a	18.1	NO INFO														Tropic Thunder- W35	18.7	0.2
Eco Budz- 9# Hammer- W9a	18.1	NO INFO														White Fire Og- W35	18.7	1.2
Platinum Super Glue High Tide Cannabis- W16a	18.1	NO INFO														Platinum Og Kush- W35	18.7	0.2
PurpleOG #5 Suncliff- W16a	18.1	0.2														Platinum OG Kush Preroll- W35	18.7	0.2
Snowdawg Pre Roll 1g Root Down- W16a	18.1	No INFO														Purple Wreck Preroll- W35	18.7	0
The Cake Pre Roll Cannaman Farms- W16a	18.1	0.2														Venom OG Preroll- W35	18.7	0.1
Allen Wrench- Artizen- - W20a	18.1	NO INFO														White Fire OG Preroll- W35	18.7	1.2
Dutch Berry- Artizen- W20a	18.1	No INFO														Sunse Sherbert- W36	18.7	NO INFO
OS- Black Cherry Soda- W28	18.1	0														Colorado Kush- W36	18.7	NO INFO
Skywalker Preroll- W35	18.1	0														Jillybean- W39	18.7	0.15
Banana Kush- W39	18.12	0.09														Sensi Star- W37	18.71	0
Banana Kush- W39	18.12	0.09														Dutchberry Pre-Roll- W32	18.77	0
SQ- Blueberry Headband- W28	18.13	0.11														Petroleum Jelly- W37	18.77	0.13
Maui Waui- W2	18.14	0.07														Banana Kush- W25	18.78	NO INFO
AK-47- W6	18.16	NO INFO														Golden Pineapple Infused (pre-roll)- W37	18.79	0.05
Jack Herer- W1	18.2	NO INFO														Confidential Kush- House of Cultivar- W7a	18.8	NO INFO
Alien Orange Gum- Gabriel- W7a	18.2	0.2														Orange Harambe- Mary Jane Cannabis- W7a	18.8	0.2
Jet Fuel- Seattle's Private Reserve- W7a	18.2	NO INFO														Sweet Retreat- LBS & OZS- W7a	18.8	0.2
Blue Magoo Cannaman Farms- W16a	18.2	NO INFO														Artizen- Fire OG- W9a	18.8	NO INFO
Dawg Walker Buddha- W16a	18.2	NO INFO														Spark- Mendo Hulk- W9a	18.8	NO INFO
Vortex Fire Cannabis- W16a	18.2	NO INFO														Top Cut- Dog Treats Flower- W9a	18.8	NO INFO
Vortex Viva - W16a	18.2	NO INFO														Double Dream- W12	18.8	0
Strawberry Cream 1g Pre Roll Landrace- W16a	18.2	NO INFO														Shangria-La Pre Roll 1g Sticky Budz- W16a	18.8	0.2
Granddaddy Purple- Phat Panda- W20a	18.2	0.2														Romulan Pre Rolls- W21a	18.8	NO INFO
Black Cherry OG (Pre-roll)- W23	18.2	NO INFO														Head Cheese- W24	18.8	NO INFO
Lavender Jones Popcorn Buds- W25	18.2	NO INFO														Grape La Cubana Cigar (Preroll)- W32	18.8	0.01
OG Ringo- W25	18.2	NO INFO														Flower Blackberry Trainwreck- W34	18.8	NO INFO
RW- Bubba Crack- W28	18.2	0														AK-47 Preroll- W35	18.8	0.1
Cannalope Kush Preroll- W33	18.2	2														Strawberry Shortcake- W36	18.8	NO INFO
Key Lime Pie- W36	18.2	NO INFO														Platnum OG Kush- W36	18.8	NO INFO
Purple Trainwreck- W24	18.215	NO INFO														La Soda- W36	18.8	NO INFO
Wonkavator- W33	18.22	0														Norhtern Lights- W1	18.81	NO INFO
Mimosa- W37	18.22	0.08														ELLA- Cosmic Charlie- W28	18.83	0
Corinto Budder- W25	18.25	No INFO														Space Queen- W24	18.84	NO INFO
Cotton Candy Kush- W25	18.25	No INFO														Gummo- W32	18.88	0.19
Corinto Budder PreRolls- W25	18.25	NO INFO														DOH Rainbow- Walden- W7a	18.9	NO INFO
Blueberry- W24	18.255	NO INFO														Green Crack Pre Roll 1g High Five Farms- W16a	18.9	1
Allen Wrench- Artizen- W7a	18.3	NO INFO														Grape Puff OG- W21a	18.9	NO INFO
Chernobyl- Forbidden Farms- W7a	18.3	NO INFO														True OG- W36	18.9	NO INFO
G-cut- Seattle's Private Reserve- W7a	18.3	NO INFO														Blueberry Biscuits- W36	18.9	NO INFO
Eco Budz- Dutch Hawaiian- W9a	18.3	NO INFO														Cuvee Joint (preroll)- W36	18.9	NO INFO
Jack of Spades by Lazy Bee- W18	18.3	0.7														Presidential Kush- W39	18.9	0.19
Jack of Spades by The Lazy Bee Gardens- W18	18.3	0.7														Blackberry Trainwreck- W37	18.95	0.67
Firewalker OG Buddha- W16a	18.3	NO INFO														Purple Pineapple Express- W37	18.95	0.67
Optimus Prime Dream City- W16a	18.3	0.3														Sour Diesel Preroll- W33	18.96	0
Gooberry Pre Roll 0.5g Artizen- W16a	18.3	NO INFO														Rude Boi OG-W2	19	0
Pink Lemonad Pre Roll 1g High Five Farms- W16a	18.3	No INFO														UK Cheese-W2	19	0
Sweet Cheese Pre Roll 1g Root Down- W16a	18.3	NO INFO														Grape Smuggler- W4a	19	NO INFO
Plushberry- W24	18.3	NO INFO														SuperManna- W4a	19	NO INFO
Space Queen Preroll- W32	18.3	0.29														Lemon Pie- W4a	19	NO INFO
Jack Of Spades- W35	18.3	0.7														Orange Kush- W4a	19	NO INFO
Santa Marta Purple- W2	18.31	1.98														Death Star- W4a	19	NO INFO
Cherry Pie- W25	18.385	NO INFO														Chocolate Kush- W4a	19	NO INFO
Kiona Gold-W2	18.39	0.52														Black Cherry Soda- W4a	19	NO INFO
Sunset Sherbert- W1	18.4	NO INFO														Pineapple Express- W4a	19	NO INFO
Hollywood OG- Seattle's Private Reserve- W7a	18.4	NO INFO														Bubbleberry- W4a	19	NO INFO
Allen Wrench Popcorn Buds Artizen- W16a	18.4	NO INFO														Pineapple Express- W6	19	NO INFO
Grape Ape Artizen- W16a	18.4	NO INFO														Purple Kush- W6	19	NO INFO
J-1 Red Frog- W16a	18.4	NO INFO														Snowdizzle- W6	19	NO INFO
The Pineapple Popcorn Buds Artizen- W16a	18.4	0.3														Alyze- Exotikz- W7a	19	NO INFO
Querkle Pre Roll 1g Root Down- W16a	18.4	0.4														Lemon Sorbet #3 (1/2)- Gabriel- W7a	19	NO INFO
Frank's Gift- W21a	18.4	13.9														Dama- Cinex- W9a	19	0.4
Sweet Cheese (Pre-roll)- W23	18.4	No INFO														Quality- Dj Short Blueberry Bubble Buds- W9a	19	NO INFO
HD- Afgooey- W28	18.4	0.04														Quality- Orange Kush- Jar- W9a	19	0.3
Flower Skunk- W34	18.4	No INFO														Quality- Purple Urkle- Jar- W9a	19	0.2
Joint Northern Lights (Preroll)- W34	18.4	NO INFO														EcoBudz- Chernobyl- W9a	19	NO INFO
Blue Dream- W37	18.4	0.4														Quality- Sapphire Star- Jar- W9a	19	NO INFO
The Black Joint (pre-roll)- W37	18.43	0.07														Jack Herer Buddha- W16a	19	NO INFO
Cannalope- W33	18.44	0														Lemon Slice AVITAS- W16a	19	NO INFO
The Pineapple- W37	18.44	0.32														Orange Rush Hemp Kings- W16a	19	NO INFO
ART- The Pineapple Preroll- W28	18.47	0.014														Pepe's Papaya Buddha - W16a	19	NO INFO
Blue Dream- Liberty Reach- W7a	18.5	NO INFO														Strawberry Fields AVITAS- W16a	19	0.2
Lemon Sweet Skunk- Sunshine Farms- W7a	18.5	NO INFO														Pot Factory Chemmy- W9b	19	0.4
DJ Short Blueberry- Dutchy- W7a	18.5	NO INFO														Pot Factory Chemmy Jones (Hybrid Preroll)- W9b	19	0.4
Albert Walker- Dream City- W7a	18.5	NO INFO														Dutchberry- Artizen- W20a	19	NO INFO
Cookie Wreck- Sunshine Farms- W7a	18.5	NO INFO														Chuckanut- W21a	19	0.3
Mt Grown Kush- Firebros- W7a	18.5	NO INFO														Blue Dream From MT. Baker Growers- W22a	19	NO INFO
Bay Dream- W12	18.5	0														Dirty Girl From Cascadia- W22a	19	NO INFO
R 18 Og by the THC Farms- W18	18.5	0														Double Lemon Cheesecake- W22a	19	NO INFO
Granola Funk Pre Roll 0.5g Liberty Reach- W16a	18.5	NO INFO														Green Crack from Natural Mystic- W22a	19	NO INFO
Mamacita- Fifty Fold- W20a	18.5	NO INFO														Purple Rain AKA Purple Cat Piss- W22a	19	NO INFO
Orange Kus- W23	18.5	NO INFO														Sour Diesel From Buddy Boy- W22a	19	NO INFO
CB- Hawaiian- W28	18.5	0														Cookie Stomper- W22a	19	NO INFO
BUDDHA Purple Kush Preroll- W28	18.5	0														Fire OG from Deepwater- W22a	19	NO INFO
Critical Kush- W32	18.5	0.09														PreRolls From Phat Panda- W22a	19	NO INFO
Flower Spell Caster- W34	18.5	NO INFO														Pre Rolls From Phat Panda- W22a	19	No INFO
R 18 Og- W35	18.5	0														Dutch Hawaiian- W4b	19	NO INFO
Silver Tip- W36	18.5	NO INFO														Black Cherry Soda- W4b	19	NO INFO
Super Lemon Haze- W37	18.5	0.4														Chemdawg- W4b	19	NO INFO
Mimosa- W37	18.5	0.1														Kosher Tangie- W4b	19	NO INFO
Cookies and Cream- W1	18.52	NO INFO														Super Manna- W4b	19	NO INFO
GCG- Alpenglow- W28	18.53	0														Columbian Gold- W4b	19	NO INFO
Green Crack- W37	18.55	0														Grape Smuggler- W4b	19	NO INFO
Blue Afghani (pre-roll)- W37	18.55	0.04														Force Shield- W4b	19	NO INFO
Purple OG (Pre-roll)- W23	18.56	NO INFO														Grape Cheese- W4b	19	NO INFO
Obama Kush- W24	18.585	NO INFO														Time Wreck- W4b	19	NO INFO
Bay Dream- W12	18.59	0														Polar Dawg- W4b	19	NO INFO
Blue Dream- Artizen- W7a	18.6	NO INFO														Berry 1 preroll- W4b	19	NO INFO
Elmer's Glue- Firebros- W7a	18.6	NO INFO														Cookies n Cream pr roll- W4b	19	NO INFO
Top Cut- Pink Candy Flower- W9a	18.6	NO INFO														Zen X- Sysco Pancho- W30	19	NO INFO
Berry White C&D- W16a	18.6	NO INFO														Purple Arrow- Harmony Farms- W30	19	NO INFO
G13 Buddha- W16a	18.6	NO INFO														Zen X- Sysco Pancho- W30	19	NO INFO
Tangerine Dream Buddha- W16a	18.6	No INFO														Purple Arrow- Harmony Farms- W30	19	NO INFO
Tahoe OG Pre Roll 1g Root Down- W16a	18.6	NO INFO														White Russian- W32	19	0.17
Larry OG- W21a	18.6	NO INFO														Afghan Kush- W33	19	0
BUDDHA- Sour Patch Kiss Preroll- W28	18.6	0														Rapper Kush X Sour Diesel Preroll- W35	19	0.2
Carl Sagan- W32	18.6	0.15														Nitro Cookes- W36	19	NO INFO
Flower Medieval Diesel- W34	18.6	NO INFO														Lemon OG- W36	19	NO INFO
Sour Diesel Preroll- W35	18.6	0.1														Gooberry- W12	19.02	0
Souwa Grapes- W36	18.6	0.9														Grapefruit- W25	19.02	NO INFO
Souwa Grapes- W36	18.6	0.9														Ultra Violet-W2	19.04	0.23
White Tahoe Cookies- W37	18.63	0.13														Ultra Violet-W2	19.04	0.23
Cookies N Cream- W32	18.67	0.13														Sunset Sherbet Jiont- W39	19.05	0
Black Afghan- Treehawk Farms- W7a	18.7	NO INFO														DS- Purple Punch- W28	19.09	0.01
Blueberry- Final Frontier- W7a	18.7	2														Lodi Dodi- Forbidden Farms- W7a	19.1	0.2
Purps 1- Tech Bud- W7a	18.7	NO INFO														Training Day- Liberty Reach- W7a	19.1	NO INFO
Cherry Sherbert- Private Reserve- W7a	18.7	NO INFO														Dama- Alaskan Thunder Fuck- W9a	19.1	0.7
Fire- Trainwreck- W9a	18.7	0.2														Artizen- Dutch Berry- W9a	19.1	NO INFO
Platinum Og Kush by Pilot Farms- W18	18.7	0.2														Vietnam Kashmiri- W25	19.1	1.07
Tropic Thunder by Pilot Farms- W18	18.7	0.2														Sour Malawi- W25	19.1	NO INFO
White Fire Og by Perma- W18	18.7	1.2														Cannaman Coffee PreRolls- W25	19.1	NO INFO
Dutch Berry Artizen- W16a	18.7	NO INFO														Space Queen Preroll- W33	19.1	0
Treedom Chernobyl- W9b	18.7	NO INFO														Snoops Dream- W36	19.1	NO INFO
Brainwreck- W21a	18.7	NO INFO														Dutchberry- W36	19.1	NO INFO
ART- Gooberry Preroll- W28	18.7	0.01														Land's End- W37	19.11	0
Allen Wrench Preroll- W33	18.7	0														Sour Diesel- W33	19.12	0
Tropic Thunder- W35	18.7	0.2														Indica Mix Preroll- W33	19.13	0
White Fire Og- W35	18.7	1.2														ART Grape Ape- W28	19.14	0.38
Platinum Og Kush- W35	18.7	0.2														Grape Ape- W24	19.16	NO INFO
Platinum OG Kush Preroll- W35	18.7	0.2														GG #4 PreRoll- W25	19.17	No INFO
Purple Wreck Preroll- W35	18.7	0														Lemonberry Preroll- W33	19.18	0
Venom OG Preroll- W35	18.7	0.1														Bare Wee Diesel- W25	19.19	NO INFO
White Fire OG Preroll- W35	18.7	1.2														Agent Orange 1937 Farms- W16a	19.2	NO INFO
Sunse Sherbert- W36	18.7	NO INFO														Allen wrench Pre Roll 1g Artizen- W16a	19.2	NO INFO
Colorado Kush- W36	18.7	NO INFO														Grizzly Kush- Rocket Cannabis- W20a	19.2	0.2
Jillybean- W39	18.7	0.15														Quantum Kush- W22a	19.2	NO INFO
Sensi Star- W37	18.71	0														Lodi Dodi- W24	19.2	NO INFO
Dutchberry Pre-Roll- W32	18.77	0														Tangie Cookies- W36	19.2	NO INFO
Petroleum Jelly- W37	18.77	0.13														Sunset Sherbet Joint (pre-roll)- W37	19.2	0.1
Banana Kush- W25	18.78	NO INFO														Grizzly Kush- W32	19.23	0.18
Golden Pineapple Infused (pre-roll)- W37	18.79	0.05														Strawberry Cough- W39	19.28	0.01
Confidential Kush- House of Cultivar- W7a	18.8	NO INFO														Bay Dream- W1	19.3	NO INFO
Orange Harambe- Mary Jane Cannabis- W7a	18.8	0.2														L.A. Starfighter- W1	19.3	NO INFO
Sweet Retreat- LBS & OZS- W7a	18.8	0.2														Grand Daddy Purple-W2	19.3	0.2
Artizen- Fire OG- W9a	18.8	NO INFO														Hog's Breath- Happy Cannabis- W7a	19.3	NO INFO
Spark- Mendo Hulk- W9a	18.8	NO INFO														Super Lemon Haze- Jackpot Seaweed- W7a	19.3	NO INFO
Top Cut- Dog Treats Flower- W9a	18.8	NO INFO														Artizen- Allen Wrench- W9a	19.3	NO INFO
Double Dream- W12	18.8	0														Black Berry by THC Farms- W18	19.3	0.1
Shangria-La Pre Roll 1g Sticky Budz- W16a	18.8	0.2														Vodis Katsu Kush- W9b	19.3	0.5
Romulan Pre Rolls- W21a	18.8	NO INFO														SPP Lemon OG (Hybrid Preroll)- W9b	19.3	NO INFO
Head Cheese- W24	18.8	NO INFO														Bubbly Pink Champagne Cone w/ Bubble Hash (Pre-roll)- W21a	19.3	NO INFO
Grape La Cubana Cigar (Preroll)- W32	18.8	0.01														Acapulco Gold- W23	19.3	NO INFO
Flower Blackberry Trainwreck- W34	18.8	NO INFO														Sweet Cheese- W23	19.3	NO INFO
AK-47 Preroll- W35	18.8	0.1														Blueberry Trainwreck- W23	19.3	NO INFO
Strawberry Shortcake- W36	18.8	NO INFO														Presidential Kush- W23	19.3	NO INFO
Platnum OG Kush- W36	18.8	NO INFO														Boss Banner- W25	19.3	NO INFO
La Soda- W36	18.8	NO INFO														Flower Dosie Pie- W34	19.3	12.7
Norhtern Lights- W1	18.81	NO INFO														Black Berry- W35	19.3	0.1
ELLA- Cosmic Charlie- W28	18.83	0														Blackberry Prerol- W35	19.3	0.1
Space Queen- W24	18.84	NO INFO														Candy Kush Preroll- W35	19.3	0
Gummo- W32	18.88	0.19														Alyze- W36	19.3	No INFO
DOH Rainbow- Walden- W7a	18.9	NO INFO														Sunset Sherbet- W37	19.32	0.09
Green Crack Pre Roll 1g High Five Farms- W16a	18.9	1														Dutch Hawaiian- W37	19.33	0.04
Grape Puff OG- W21a	18.9	NO INFO														ART- Stardawg Preroll- W28	19.39	0.54
True OG- W36	18.9	NO INFO														Soulshine- Hindu Kush- W9a	19.4	0.2
Blueberry Biscuits- W36	18.9	NO INFO														Three Kings Sonic Green- W16a	19.4	NO INFO
Cuvee Joint (preroll)- W36	18.9	NO INFO														Girl Scout Master Pre Roll 1g Good Pot- W16a	19.4	NO INFO
Presidential Kush- W39	18.9	0.19														Lemon Cheesecake Thai Jar Cones- W21a	19.4	0.6
Blackberry Trainwreck- W37	18.95	0.67														Purple OG- W25	19.4	NO INFO
Purple Pineapple Express- W37	18.95	0.67														HD- Permafrost- W28	19.4	0.5
Sour Diesel Preroll- W33	18.96	0														BC- Dutch Treat Preroll- W28	19.4	0
Rude Boi OG-W2	19	0														BLF North- Orange Blossom- W36	19.4	NO INFO
UK Cheese-W2	19	0														Star Dawg (pre-roll)- W37	19.4	0.1
Grape Smuggler- W4a	19	NO INFO														Cookies- W39	19.42	0.02
SuperManna- W4a	19	NO INFO														White Widow- W33	19.44	0
Lemon Pie- W4a	19	NO INFO														Grape Ape- W33	19.46	0.26
Orange Kush- W4a	19	NO INFO														Super Lemon Haze- W1	19.5	NO INFO
Death Star- W4a	19	NO INFO														Golden Pineapple Trim- Lopez and Orr- W7a	19.5	0.4
Chocolate Kush- W4a	19	NO INFO														Alien Gift- Firebros- W7a	19.5	NO INFO
Black Cherry Soda- W4a	19	NO INFO														Ewok- Nebula- W7a	19.5	NO INFO
Pineapple Express- W4a	19	NO INFO														DAMA- DJ Short Bluebrry- W9a	19.5	0.3
Bubbleberry- W4a	19	NO INFO														Liberty Reach- Mendo Breath- W9a	19.5	NO INFO
Pineapple Express- W6	19	NO INFO														Mystery Cookie by Pilot Farms- W18	19.5	0.1
Purple Kush- W6	19	NO INFO														Game Changer Shake Hemp Kings- W16a	19.5	NO INFO
Snowdizzle- W6	19	NO INFO														Grapefruit Buddha- W16a	19.5	NO INFO
Alyze- Exotikz- W7a	19	NO INFO														Training Day Liberty Reach- W16a	19.5	NO INFO
Lemon Sorbet #3 (1/2)- Gabriel- W7a	19	NO INFO														Hindu Kush Pre Rol Soulshine- W16a	19.5	NO INFO
Dama- Cinex- W9a	19	0.4														OGKB Pre Roll 1g Liberty Reach- W16a	19.5	No INFO
Quality- Dj Short Blueberry Bubble Buds- W9a	19	NO INFO														Dawg Star Wonder Woman- W9b	19.5	No INFO
Quality- Orange Kush- Jar- W9a	19	0.3														Pineapple Chunk- W22a	19.5	NO INFO
Quality- Purple Urkle- Jar- W9a	19	0.2														Purple Urkle- W23	19.5	NO INFO
EcoBudz- Chernobyl- W9a	19	NO INFO														Critical Purple Kush- W32	19.5	0.1
Quality- Sapphire Star- Jar- W9a	19	NO INFO														Flower Afgooey- W34	19.5	NO INFO
Jack Herer Buddha- W16a	19	NO INFO														Mystery Cookie- W35	19.5	0.1
Lemon Slice AVITAS- W16a	19	NO INFO														Lemonberry- W33	19.53	0.24
Orange Rush Hemp Kings- W16a	19	NO INFO														Cookies N Cream- W32	19.54	0.14
Pepe's Papaya Buddha - W16a	19	NO INFO														Hellfire- W32	19.56	0.88
Strawberry Fields AVITAS- W16a	19	0.2														Lemonberry- W24	19.57	No INFO
Pot Factory Chemmy- W9b	19	0.4														Sunset Sherbert- W32	19.58	0.06
Pot Factory Chemmy Jones (Hybrid Preroll)- W9b	19	0.4														Sour Kush (pre-roll)- W37	19.59	0.05
Dutchberry- Artizen- W20a	19	NO INFO														Super Blue Dream-W2	19.6	0
Chuckanut- W21a	19	0.3														White Widow-W2	19.6	1.41
Blue Dream From MT. Baker Growers- W22a	19	NO INFO														Golden Temple Kush- 1937 Farms- W7a	19.6	NO INFO
Dirty Girl From Cascadia- W22a	19	NO INFO														Hindu Kush- Soulshine- W7a	19.6	NO INFO
Double Lemon Cheesecake- W22a	19	NO INFO														Lemon Cookies by Pilot Farms- W18	19.6	0.2
Green Crack from Natural Mystic- W22a	19	NO INFO														Big Purple Fire Cannabis - W16a	19.6	0.2
Purple Rain AKA Purple Cat Piss- W22a	19	NO INFO														Cinex Hemp Kings- W16a	19.6	NO INFO
Sour Diesel From Buddy Boy- W22a	19	NO INFO														G-13 Haze Popcorn Buds Red Frog- W16a	19.6	NO INFO
Cookie Stomper- W22a	19	NO INFO														NY Purple Diesel Forte - W16a	19.6	NO INFO
Fire OG from Deepwater- W22a	19	NO INFO														Sour Patch Kiss Buddha- W16a	19.6	NO INFO
PreRolls From Phat Panda- W22a	19	NO INFO														Spacetiva- W23	19.6	NO INFO
Pre Rolls From Phat Panda- W22a	19	No INFO														Afghani x Mexican Sativa- W24	19.6	NO INFO
Dutch Hawaiian- W4b	19	NO INFO														Hog- W32	19.6	0.22
Black Cherry Soda- W4b	19	NO INFO														Joints Super Silver Lemon Skunk Infused (Preroll)- W34	19.6	NO INFO
Chemdawg- W4b	19	NO INFO														Joint J1 (Preroll)- W34	19.6	NO INFO
Kosher Tangie- W4b	19	NO INFO														Lemon Cookies- W35	19.6	0.2
Super Manna- W4b	19	NO INFO														Blue Dream by Lazy Bee Gardens- W8	19.62	0.14
Columbian Gold- W4b	19	NO INFO														Space Queen Preroll- W32	19.62	0
Grape Smuggler- W4b	19	NO INFO														Omrita CBD- W37	19.62	0.83
Force Shield- W4b	19	NO INFO														Purple Pinecone- W1	19.64	2.3
Grape Cheese- W4b	19	NO INFO														Kush Dream- W39	19.65	0.02
Time Wreck- W4b	19	NO INFO														Land's End- W25	19.66	NO INFO
Polar Dawg- W4b	19	NO INFO														Fudd- W39	19.68	0.39
Berry 1 preroll- W4b	19	NO INFO														Sage N Sour- W25	19.69	1.2
Cookies n Cream pr roll- W4b	19	NO INFO														Critical Puple Kush- WEED- W7a	19.7	NO INFO
Zen X- Sysco Pancho- W30	19	NO INFO														White Nightmare Trim- Sweet Leaf & Kief- W7a	19.7	NO INFO
Purple Arrow- Harmony Farms- W30	19	NO INFO														Dama- Berry White- W9a	19.7	No INFO
Zen X- Sysco Pancho- W30	19	NO INFO														The Hound Shake- W12	19.7	0
Purple Arrow- Harmony Farms- W30	19	NO INFO														Permafrost- W12	19.7	0
White Russian- W32	19	0.17														Fire OG Popcorn Buds Artizen- W16a	19.7	NO INFO
Afghan Kush- W33	19	0														Jack Herer Red Frog- W16a	19.7	NO INFO
Rapper Kush X Sour Diesel Preroll- W35	19	0.2														Space Queen Popcorn Buds Artizen- W16a	19.7	NO INFO
Nitro Cookes- W36	19	NO INFO														UW Pre Roll Cannaman Farms- W16a	19.7	NO INFO
Lemon OG- W36	19	NO INFO														Nigerian Haze- W21a	19.7	0.2
Gooberry- W12	19.02	0														AK-47- W25	19.7	NO INFO
Grapefruit- W25	19.02	NO INFO														Flower Chemmy Jones- W34	19.7	NO INFO
Ultra Violet-W2	19.04	0.23														Grape Ape- W36	19.7	NO INFO
Ultra Violet-W2	19.04	0.23														Allen Wrench Preroll- W32	19.71	0.06
Sunset Sherbet Jiont- W39	19.05	0														DJ Short Blueberry- W2	19.73	0.05
DS- Purple Punch- W28	19.09	0.01														Clementine- W33	19.73	0.49
Lodi Dodi- Forbidden Farms- W7a	19.1	0.2														Tangie- W2	19.76	0.22
Training Day- Liberty Reach- W7a	19.1	NO INFO														Tangie-W2	19.76	0.22
Dama- Alaskan Thunder Fuck- W9a	19.1	0.7														Ewok- Soulshine- W7a	19.8	NO INFO
Artizen- Dutch Berry- W9a	19.1	NO INFO														Purple Sour Diesel- Washington Bud Company- W7a	19.8	NO INFO
Vietnam Kashmiri- W25	19.1	1.07														High Five- Purple Mango- W9a	19.8	0.4
Sour Malawi- W25	19.1	NO INFO														Blue Sugar Cookies High Five Farms- W16a	19.8	0.5
Cannaman Coffee PreRolls- W25	19.1	NO INFO														The Pineapple Pre Roll 1g Artizen- W16a	19.8	NO INFO
Space Queen Preroll- W33	19.1	0														SPP Bubba Kush (Indica Preroll)- W9b	19.8	0.4
Snoops Dream- W36	19.1	NO INFO														Sour diesel- Virginia Company- W20a	19.8	0.2
Dutchberry- W36	19.1	NO INFO														9lb Hammer- W24	19.8	NO INFO
Land's End- W37	19.11	0														Joint Grape Durbs (Preroll)- W34	19.8	No INFO
Sour Diesel- W33	19.12	0														Grand Canyon- W25	19.87	NO INFO
Indica Mix Preroll- W33	19.13	0														Jesus OG- W32	19.88	0
ART Grape Ape- W28	19.14	0.38														Blue Dynamite- Happy Cannabis- W7a	19.9	NO INFO
Grape Ape- W24	19.16	NO INFO														Cherry Pie Mango- Mary Jane Cannabis- W7a	19.9	0.6
GG #4 PreRoll- W25	19.17	No INFO														Golden Pineapple- Marley Natural- W7a	19.9	NO INFO
Lemonberry Preroll- W33	19.18	0														Pink Panther- Dama- W7a	19.9	0.2
Bare Wee Diesel- W25	19.19	NO INFO														Sour Urkle- From the Soil- W7a	19.9	NO INFO
Agent Orange 1937 Farms- W16a	19.2	NO INFO														Huckleberry Pie 7g Shake- W12	19.9	0
Allen wrench Pre Roll 1g Artizen- W16a	19.2	NO INFO														Phat Panda Grunk (Hybrid Preroll)- W9b	19.9	0.3
Grizzly Kush- Rocket Cannabis- W20a	19.2	0.2														Knights Hemplar Blueberry Blast (Sativa Preroll)- W9b	19.9	NO INFO
Quantum Kush- W22a	19.2	NO INFO														Pineapple Dream- W23	19.9	NO INFO
Lodi Dodi- W24	19.2	NO INFO														Shiatsu Kush (Pre Roll)- W23	19.9	NO INFO
Tangie Cookies- W36	19.2	NO INFO														Flavr Blue- W25	19.9	NO INFO
Sunset Sherbet Joint (pre-roll)- W37	19.2	0.1														XJ- 13- W25	19.9	NO INFO
Grizzly Kush- W32	19.23	0.18														HD- Querkle- W28	19.9	0.01
Strawberry Cough- W39	19.28	0.01														Lemon Meringue- W36	19.9	NO INFO
Bay Dream- W1	19.3	NO INFO														24k- W36	19.9	NO INFO
L.A. Starfighter- W1	19.3	NO INFO														Gorilla Glue- W32	19.91	0.23
Grand Daddy Purple-W2	19.3	0.2														Skywalker OG- W25	19.95	NO INFO
Hog's Breath- Happy Cannabis- W7a	19.3	NO INFO														Gooberry (pre-roll- W37	19.98	0.09
Super Lemon Haze- Jackpot Seaweed- W7a	19.3	NO INFO														Master Kush-W2	19.99	0.06
Artizen- Allen Wrench- W9a	19.3	NO INFO														Cuvee- W1	20	NO INFO
Black Berry by THC Farms- W18	19.3	0.1														Em Dawg- W4a	20	NO INFO
Vodis Katsu Kush- W9b	19.3	0.5														Blue Dot Dawg- W4a	20	NO INFO
SPP Lemon OG (Hybrid Preroll)- W9b	19.3	NO INFO														Dogwalker- W4a	20	NO INFO
Bubbly Pink Champagne Cone w/ Bubble Hash (Pre-roll)- W21a	19.3	NO INFO														Alien Orange Cookies- W4a	20	NO INFO
Acapulco Gold- W23	19.3	NO INFO														Blackberry Crush- W4a	20	NO INFO
Sweet Cheese- W23	19.3	NO INFO														Urban Poison- W4a	20	NO INFO
Blueberry Trainwreck- W23	19.3	NO INFO														Dutch Hawaiian- W4a	20	NO INFO
Presidential Kush- W23	19.3	NO INFO														Pineapple Super Silver Haze- W4a	20	NO INFO
Boss Banner- W25	19.3	NO INFO														Romulan- W4a	20	NO INFO
Flower Dosie Pie- W34	19.3	12.7														9 Pound Hammer- W4a	20	NO INFO
Black Berry- W35	19.3	0.1														Jack Frost- W4a	20	NO INFO
Blackberry Prerol- W35	19.3	0.1														Blue Dream- W4a	20	NO INFO
Candy Kush Preroll- W35	19.3	0														Blueberry Silvertip- W4a	20	NO INFO
Alyze- W36	19.3	No INFO														Blue Dream- W4a	20	NO INFO
Sunset Sherbet- W37	19.32	0.09														Dutch Treat- W4a	20	NO INFO
Dutch Hawaiian- W37	19.33	0.04														Tangerine Dream- W4a	20	NO INFO
ART- Stardawg Preroll- W28	19.39	0.54														GG - W4a	20	NO INFO
Soulshine- Hindu Kush- W9a	19.4	0.2														Pure Power Plant- W4a	20	NO INFO
Three Kings Sonic Green- W16a	19.4	NO INFO														Strawberry Lemonade- W6	20	NO INFO
Girl Scout Master Pre Roll 1g Good Pot- W16a	19.4	NO INFO														UW Purple- W6	20	NO INFO
Lemon Cheesecake Thai Jar Cones- W21a	19.4	0.6														Lemon Sorbet #3- Gabriel- W7a	20	NO INFO
Purple OG- W25	19.4	NO INFO														Middle Fork by North Coast Growers- W8	20	NO INFO
HD- Permafrost- W28	19.4	0.5														Sky Standard- Bubba Kush- W9a	20	NO INFO
BC- Dutch Treat Preroll- W28	19.4	0														Dutch Treat- W9a	20	NO INFO
BLF North- Orange Blossom- W36	19.4	NO INFO														Sky Standard- Cherry Pie- W9a	20	NO INFO
Star Dawg (pre-roll)- W37	19.4	0.1														Sky Standard- Middle Fork- W9a	20	NO INFO
Cookies- W39	19.42	0.02														Purple Diesel by Craft Cannabis- W18	20	0.2
White Widow- W33	19.44	0														Animal Cookies 1937 Farms- W16a	20	NO INFO
Grape Ape- W33	19.46	0.26														Cherry Sherbert NWCS- W16a	20	NO INFO
Super Lemon Haze- W1	19.5	NO INFO														Lemon OG Top Shelf- W16a	20	NO INFO
Golden Pineapple Trim- Lopez and Orr- W7a	19.5	0.4														Purple Arrow Hempkings- W16a	20	NO INFO
Alien Gift- Firebros- W7a	19.5	NO INFO														Very Berry Haze SG- W16a	20	0.2
Ewok- Nebula- W7a	19.5	NO INFO														GG #4 Pre Roll 1g Liberty Reach- W16a	20	No INFO
DAMA- DJ Short Bluebrry- W9a	19.5	0.3														Pearl Pre Roll 1.5g 1937 Farms- W16a	20	NO INFO
Liberty Reach- Mendo Breath- W9a	19.5	NO INFO														Tangerine Power Pre Roll 1g Liberty Reach- W16a	20	No INFO
Mystery Cookie by Pilot Farms- W18	19.5	0.1														ATF From Buddy Boy- W22a	20	NO INFO
Game Changer Shake Hemp Kings- W16a	19.5	NO INFO														ATF From LCG- W22a	20	NO INFO
Grapefruit Buddha- W16a	19.5	NO INFO														Canguru De Oaxaca- W22a	20	NO INFO
Training Day Liberty Reach- W16a	19.5	NO INFO														Day Tripper From GaGa- W22a	20	NO INFO
Hindu Kush Pre Rol Soulshine- W16a	19.5	NO INFO														Golden Pineapple- W22a	20	NO INFO
OGKB Pre Roll 1g Liberty Reach- W16a	19.5	No INFO														Pablo's Panama Gold- W22a	20	NO INFO
Dawg Star Wonder Woman- W9b	19.5	No INFO														Phantom Cookies- W22a	20	No INFO
Pineapple Chunk- W22a	19.5	NO INFO														Sour Diesel From LCG- W22a	20	NO INFO
Purple Urkle- W23	19.5	NO INFO														Candy Kush- W22a	20	NO INFO
Critical Purple Kush- W32	19.5	0.1														God's Gift From LCG- W22a	20	NO INFO
Flower Afgooey- W34	19.5	NO INFO														Orange Blossom From Lilac City- W22a	20	NO INFO
Mystery Cookie- W35	19.5	0.1														Sherbet From GTP- W22a	20	NO INFO
Lemonberry- W33	19.53	0.24														Supergirl- W22a	20	NO INFO
Cookies N Cream- W32	19.54	0.14														The Candy- W22a	20	NO INFO
Hellfire- W32	19.56	0.88														LEEF .5G-1G Premium Pre Rolls- W22a	20	NO INFO
Lemonberry- W24	19.57	No INFO														Joint Packs "Stash Box" From Prohbiition Brands- W22a	20	NO INFO
Sunset Sherbert- W32	19.58	0.06														Pre Roll 2 Packs From Freya- W22a	20	NO INFO
Sour Kush (pre-roll)- W37	19.59	0.05														Pre Roll 2 Packs From Lilac City Gardens- W22a	20	No INFO
Super Blue Dream-W2	19.6	0														Pre Roll 4-Packs from Ceres	20	NO INFO
White Widow-W2	19.6	1.41														Pre Roll Packs from Florigen- W22a	20	NO INFO
Golden Temple Kush- 1937 Farms- W7a	19.6	NO INFO														Pre Rolls from MT Baker Gardens- W22a	20	NO INFO
Hindu Kush- Soulshine- W7a	19.6	NO INFO														Chocolate Kush	20	NO INFO
Lemon Cookies by Pilot Farms- W18	19.6	0.2														White Rhino- W4b	20	NO INFO
Big Purple Fire Cannabis - W16a	19.6	0.2														The Hog- W4b	20	NO INFO
Cinex Hemp Kings- W16a	19.6	NO INFO														Goji OG- W4b	20	NO INFO
G-13 Haze Popcorn Buds Red Frog- W16a	19.6	NO INFO														Frosting- W4b	20	NO INFO
NY Purple Diesel Forte - W16a	19.6	NO INFO														Lemon OG- W4b	20	NO INFO
Sour Patch Kiss Buddha- W16a	19.6	NO INFO														Purple Lemon Haze- W4b	20	NO INFO
Spacetiva- W23	19.6	NO INFO														G-7 Dream- W4b	20	NO INFO
Afghani x Mexican Sativa- W24	19.6	NO INFO														Grease OG- W4b	20	NO INFO
Hog- W32	19.6	0.22														GG- W4b	20	NO INFO
Joints Super Silver Lemon Skunk Infused (Preroll)- W34	19.6	NO INFO														Manna Special Blend- W4b	20	NO INFO
Joint J1 (Preroll)- W34	19.6	NO INFO														Tahoe X- W24b	20	NO INFO
Lemon Cookies- W35	19.6	0.2														Liberty OG- W4b	20	NO INFO
Blue Dream by Lazy Bee Gardens- W8	19.62	0.14														Galatic jack 2pk preroll- W4b	20	NO INFO
Space Queen Preroll- W32	19.62	0														Cartoon Kush- preroll W4b	20	NO INFO
Omrita CBD- W37	19.62	0.83														Kosher Kush preroll- W4b	20	No INFO
Purple Pinecone- W1	19.64	2.3														Blueerry Bubble Gum Preroll- W4b	20	NO INFO
Kush Dream- W39	19.65	0.02														White Lotus Preroll- W4b	20	No INFO
Land's End- W25	19.66	NO INFO														Pink Panther- W24	20	No INFO
Fudd- W39	19.68	0.39														Tangie- W25	20	NO INFO
Sage N Sour- W25	19.69	1.2														Alien Rift- W25	20	NO INFO
Critical Puple Kush- WEED- W7a	19.7	NO INFO														Ultra Violet- W25	20	NO INFO
White Nightmare Trim- Sweet Leaf & Kief- W7a	19.7	NO INFO														ELLA- Tangie- W28	20	0.1
Dama- Berry White- W9a	19.7	No INFO														MB- Pineapple Express- W28	20	0
The Hound Shake- W12	19.7	0														ART- Grape Ape Preroll- W28	20	0
Permafrost- W12	19.7	0														ART- Space Queen Preroll- W28	20	0
Fire OG Popcorn Buds Artizen- W16a	19.7	NO INFO														ART- Space Queen Preroll- W28	20	0
Jack Herer Red Frog- W16a	19.7	NO INFO														Kindness- W30	20	NO INFO
Space Queen Popcorn Buds Artizen- W16a	19.7	NO INFO														Night Train- W30	20	NO INFO
UW Pre Roll Cannaman Farms- W16a	19.7	NO INFO														UW Purple- W30	20	NO INFO
Nigerian Haze- W21a	19.7	0.2														Blue Bird- W30	20	NO INFO
AK-47- W25	19.7	NO INFO														Blueberry- W30	20	NO INFO
Flower Chemmy Jones- W34	19.7	NO INFO														Jeraldean- Clandestine- W30	20	NO INFO
Grape Ape- W36	19.7	NO INFO														Sunset Sherbet- Canna Organix- W30	20	NO INFO
Allen Wrench Preroll- W32	19.71	0.06														Walker Sour- Clandestine- W30	20	NO INFO
DJ Short Blueberry- W2	19.73	0.05														Kindness- W30	20	NO INFO
Clementine- W33	19.73	0.49														Night Train- W30	20	NO INFO
Tangie- W2	19.76	0.22														UW Purple- W30	20	NO INFO
Tangie-W2	19.76	0.22														Blue Bird- W30	20	NO INFO
Ewok- Soulshine- W7a	19.8	NO INFO														Blueberry- W30	20	NO INFO
Purple Sour Diesel- Washington Bud Company- W7a	19.8	NO INFO														Jeraldean- Clandestine- W30	20	NO INFO
High Five- Purple Mango- W9a	19.8	0.4														Sunset Sherbet- Canna Organix- W30	20	NO INFO
Blue Sugar Cookies High Five Farms- W16a	19.8	0.5														Walker Sour- Clandestine- W30	20	NO INFO
The Pineapple Pre Roll 1g Artizen- W16a	19.8	NO INFO														Afghani Diesel- W32	20	NO INFO
SPP Bubba Kush (Indica Preroll)- W9b	19.8	0.4														Animal Cookies- W32	20	NO INFO
Sour diesel- Virginia Company- W20a	19.8	0.2														Blackberry Diesel- W32	20	NO INFO
9lb Hammer- W24	19.8	NO INFO														24K Gold Preroll- W32	20	NO INFO
Joint Grape Durbs (Preroll)- W34	19.8	No INFO														Canyland Preroll- W32	20	NO INFO
Grand Canyon- W25	19.87	NO INFO														Strawberry Banana Preroll- W32	20	NO INFO
Jesus OG- W32	19.88	0														Dutch Hawaiian- W33	20	0
Blue Dynamite- Happy Cannabis- W7a	19.9	NO INFO														Gooberry- W33	20	0
Cherry Pie Mango- Mary Jane Cannabis- W7a	19.9	0.6														Blackberry Cream- W33	20	0.2
Golden Pineapple- Marley Natural- W7a	19.9	NO INFO														GG4- W33	20	0.11
Pink Panther- Dama- W7a	19.9	0.2														Blue Dream- W33	20	0
Sour Urkle- From the Soil- W7a	19.9	NO INFO														Purple Diesel- W35	20	0.2
Huckleberry Pie 7g Shake- W12	19.9	0														Thai Mini- W36	20	NO INFO
Phat Panda Grunk (Hybrid Preroll)- W9b	19.9	0.3														Raskal Berries- W36	20	0.2
Knights Hemplar Blueberry Blast (Sativa Preroll)- W9b	19.9	NO INFO														Fruity Pebbles B Bud- W36	20	NO INFO
Pineapple Dream- W23	19.9	NO INFO														Alien Asshat- W36	20	NO INFO
Shiatsu Kush (Pre Roll)- W23	19.9	NO INFO														Kush Wreck- W36	20	NO INFO
Flavr Blue- W25	19.9	NO INFO														Cherry Pie- W37	20	0.08
XJ- 13- W25	19.9	NO INFO														Grand Daddy Purple- W1	20.02	NO INFO
HD- Querkle- W28	19.9	0.01														Bay Dream- W32	20.02	0.09
Lemon Meringue- W36	19.9	NO INFO														Star Dawg Preroll- W33	20.02	0
24k- W36	19.9	NO INFO														Alaskan Thunder Fuck- W37	20.02	0.12
Gorilla Glue- W32	19.91	0.23														Permafrost- W24	20.04	NO INFO
Skywalker OG- W25	19.95	NO INFO														Orange Kush Paper Planes (pre-roll)- W37	20.04	1.11
Gooberry (pre-roll- W37	19.98	0.09														Glookies -W2	20.07	0.05
Master Kush-W2	19.99	0.06														Sherbet Cookies- W25	20.07	NO INFO
Cuvee- W1	20	NO INFO														Sherbet Cookies PreRoll- W25	20.07	NO INFO
Em Dawg- W4a	20	NO INFO														Marmalade- W37	20.08	0
Blue Dot Dawg- W4a	20	NO INFO														Super Sour Diesel- Golden Tree- W7a	20.1	NO INFO
Dogwalker- W4a	20	NO INFO														Applie Pie- Freddy's Fuego- W7a	20.1	NO INFO
Alien Orange Cookies- W4a	20	NO INFO														Pamelina- From the Soil- W7a	20.1	NO INFO
Blackberry Crush- W4a	20	NO INFO														Pearl- 1937 Farms- W7a	20.1	NO INFO
Urban Poison- W4a	20	NO INFO														XJ-13- Solstice Tradition- W7a	20.1	NO INFO
Dutch Hawaiian- W4a	20	NO INFO														Knights Hemplar- Kings Kush- W9a	20.1	0.4
Pineapple Super Silver Haze- W4a	20	NO INFO														Animal Tangry by Washington State Sweet Leaf Gardens- W18	20.1	0.1
Romulan- W4a	20	NO INFO														Tangie by Lazy Bee- W18	20.1	0.4
9 Pound Hammer- W4a	20	NO INFO														Dutch Berry Popcorn Buds Artizen- W16a	20.1	0.3
Jack Frost- W4a	20	NO INFO														Tangie 1937 Farms- W16a	20.1	NO INFO
Blue Dream- W4a	20	NO INFO														Tavo Happy cannabis- W16a	20.1	NO INFO
Blueberry Silvertip- W4a	20	NO INFO														Dawg Star Dog Walker- W9b	20.1	NO INFO
Blue Dream- W4a	20	NO INFO														Raspberry Kush- Inflorescence- W20a	20.1	NO INFO
Dutch Treat- W4a	20	NO INFO														Pamelina- W23	20.1	NO INFO
Tangerine Dream- W4a	20	NO INFO														Maui Suer Dawg- W24	20.1	NO INFO
GG - W4a	20	NO INFO														Blue Cookies- W24	20.1	NO INFO
Pure Power Plant- W4a	20	NO INFO														Cherry Pie- W24	20.1	NO INFO
Strawberry Lemonade- W6	20	NO INFO														Afgooberry- W24	20.1	NO INFO
UW Purple- W6	20	NO INFO														DS- Lemon Drop- W28	20.1	0.03
Lemon Sorbet #3- Gabriel- W7a	20	NO INFO														Alien OG- W33	20.1	0
Middle Fork by North Coast Growers- W8	20	NO INFO														Flower Sloop's OG- W34	20.1	NO INFO
Sky Standard- Bubba Kush- W9a	20	NO INFO														Joint Sloop's OG (preroll)- W34	20.1	NO INFO
Dutch Treat- W9a	20	NO INFO														Animal Tangry- W35	20.1	0.1
Sky Standard- Cherry Pie- W9a	20	NO INFO														Tangie- W35	20.1	0.4
Sky Standard- Middle Fork- W9a	20	NO INFO														Blackberry Preroll- W35	20.1	0.2
Purple Diesel by Craft Cannabis- W18	20	0.2														Hawaiian Dream- W36	20.1	0.7
Animal Cookies 1937 Farms- W16a	20	NO INFO														Blueberry Shortcake- W36	20.1	NO INFO
Cherry Sherbert NWCS- W16a	20	NO INFO														WD-40- W36	20.1	No INFO
Lemon OG Top Shelf- W16a	20	NO INFO														Goji OG- W36	20.1	NO INFO
Purple Arrow Hempkings- W16a	20	NO INFO														RYO One Love- W1	20.12	NO INFO
Very Berry Haze SG- W16a	20	0.2														5 P's #3- W32	20.12	0.19
GG #4 Pre Roll 1g Liberty Reach- W16a	20	No INFO														Sloop's OG- W39	20.12	0
Pearl Pre Roll 1.5g 1937 Farms- W16a	20	NO INFO														Purple Pie- W32	20.13	0.09
Tangerine Power Pre Roll 1g Liberty Reach- W16a	20	No INFO														Black Afghan by TreeHawk Farms- W8	20.14	0.09
ATF From Buddy Boy- W22a	20	NO INFO														CA- Cherry Ak- W28	20.14	0.4
ATF From LCG- W22a	20	NO INFO														Fk- Chocolate NY Disel Preroll- W28	20.14	2.45
Canguru De Oaxaca- W22a	20	NO INFO														Gorilla Glue #4- W24	20.15	NO INFO
Day Tripper From GaGa- W22a	20	NO INFO														The Pineapple Preroll- W33	20.15	0
Golden Pineapple- W22a	20	NO INFO														Hellfire-W32	20.16	0.09
Pablo's Panama Gold- W22a	20	NO INFO														Snoop's Dream- W25	20.18	NO INFO
Phantom Cookies- W22a	20	No INFO														Pineapple Kush-W2	20.2	0.05
Sour Diesel From LCG- W22a	20	NO INFO														Candy Apple- Treehawk Farms- W7a	20.2	NO INFO
Candy Kush- W22a	20	NO INFO														Soulshine- Narnia- W9a	20.2	NO INFO
God's Gift From LCG- W22a	20	NO INFO														OMG- GSC Berners Cut OMG- W9a	20.2	NO INFO
Orange Blossom From Lilac City- W22a	20	NO INFO														Western Cultured- Banana Split- W9a	20.2	NO INFO
Sherbet From GTP- W22a	20	NO INFO														Stardawg- W12	20.2	0
Supergirl- W22a	20	NO INFO														Atf x GE Dream Ciy- W16a	20.2	NO INFO
The Candy- W22a	20	NO INFO														LA Confidential Freddy's Fuego- W16a	20.2	NO INFO
LEEF .5G-1G Premium Pre Rolls- W22a	20	NO INFO														Green Dream Pre Roll Forte Farms- W16a	20.2	NO INFO
Joint Packs "Stash Box" From Prohbiition Brands- W22a	20	NO INFO														Vodis Doctor Doctor (Sativa Preroll)- W9b	20.2	NO INFO
Pre Roll 2 Packs From Freya- W22a	20	NO INFO														Leef Kush Dream 3 (Indica Preroll)- W9b	20.2	No INFO
Pre Roll 2 Packs From Lilac City Gardens- W22a	20	No INFO														Banana Split- Western Cultured- W20a	20.2	NO INFO
Pre Roll 4-Packs from Ceres	20	NO INFO														A.T.F.- W23	20.2	NO INFO
Pre Roll Packs from Florigen- W22a	20	NO INFO														Blackberry Cream (Pre-roll)- W23	20.2	NO INFO
Pre Rolls from MT Baker Gardens- W22a	20	NO INFO														Cookie Push- W24	20.2	NO INFO
Chocolate Kush	20	NO INFO														Sour Urkle- W24	20.2	NO INFO
White Rhino- W4b	20	NO INFO														ART- Blue Dream Preroll- W28	20.2	0
The Hog- W4b	20	NO INFO														Jesus OG- W32	20.2	0
Goji OG- W4b	20	NO INFO														Blue Cookies Preroll- W32	20.2	NO INFO
Frosting- W4b	20	NO INFO														Heavy Duty Fruity Preroll- W33	20.2	0
Lemon OG- W4b	20	NO INFO														Wi-Fi Preroll- W33	20.2	0
Purple Lemon Haze- W4b	20	NO INFO														Royal Kush- W36	20.2	NO INFO
G-7 Dream- W4b	20	NO INFO														BUDDHA- ATF preroll- W28	20.22	0
Grease OG- W4b	20	NO INFO														Berry White- W37	20.22	0
GG- W4b	20	NO INFO														Major Tom- W23	20.24	NO INFO
Manna Special Blend- W4b	20	NO INFO														Durban Poison- W25	20.24	NO INFO
Tahoe X- W24b	20	NO INFO														CPK Prerolls- W25	20.25	1.52
Liberty OG- W4b	20	NO INFO														Green Crack- W24	20.255	NO INFO
Galatic jack 2pk preroll- W4b	20	NO INFO														Tangerine Dream- W24	20.28	NO INFO
Cartoon Kush- preroll W4b	20	NO INFO														Grandaddy Purple- W32	20.28	0.14
Kosher Kush preroll- W4b	20	No INFO														Girl Scout Cookies- W32	20.28	0.1
Blueerry Bubble Gum Preroll- W4b	20	NO INFO														Prism #1- W37	20.29	0.73
White Lotus Preroll- W4b	20	No INFO														True OG Joint- W39	20.29	0.29
Pink Panther- W24	20	No INFO														Secret Recipe- W1	20.3	NO INFO
Tangie- W25	20	NO INFO														Cherry OG- American Weed Company- W7a	20.3	NO INFO
Alien Rift- W25	20	NO INFO														Dutchberry- Artizen- W7a	20.3	0.2
Ultra Violet- W25	20	NO INFO														Fire OG- Dutchy- W7a	20.3	NO INFO
ELLA- Tangie- W28	20	0.1														Lierty OG- Jackpot Seaweed- W7a	20.3	NO INFO
MB- Pineapple Express- W28	20	0														Maui Wowie Trim- Sweet Leaf & Kief- W7a	20.3	NO INFO
ART- Grape Ape Preroll- W28	20	0														Soulshine- Himalayan Blackberry- W9a	20.3	NO INFO
ART- Space Queen Preroll- W28	20	0														Treedom- Blue Bastard- W9a	20.3	NO INFO
ART- Space Queen Preroll- W28	20	0														Cookies and Cream by Methow Horticulture- W18	20.3	0
Kindness- W30	20	NO INFO														Golden Ticket Liberty Reach- W16a	20.3	NO INFO
Night Train- W30	20	NO INFO														Hammerhead High Five Farms- W16a	20.3	0.7
UW Purple- W30	20	NO INFO														Jack Herer Rochester Farms- W16a	20.3	0.5
Blue Bird- W30	20	NO INFO														Lemon Marmalade Platinum Gardens- W16a	20.3	NO INFO
Blueberry- W30	20	NO INFO														Orange Velvet Sonic Green- W16a	20.3	0.2
Jeraldean- Clandestine- W30	20	NO INFO														Plushberry Elements- W16a	20.3	NO INFO
Sunset Sherbet- Canna Organix- W30	20	NO INFO														Sour Amnesia Forte- W16a	20.3	NO INFO
Walker Sour- Clandestine- W30	20	NO INFO														Berry White Pre Roll 1g Forte- W16a	20.3	0.4
Kindness- W30	20	NO INFO														Jilly Bean Pre Roll 1g Lazy Bee- W16a	20.3	0.6
Night Train- W30	20	NO INFO														Dirty White Girl- Evergrow Northwest- W20a	20.3	NO INFO
UW Purple- W30	20	NO INFO														Jazz- Medusa- W20a	20.3	NO INFO
Blue Bird- W30	20	NO INFO														UW Purple- Dawg Star- W20a	20.3	NO INFO
Blueberry- W30	20	NO INFO														Alice in Wonderland- W21a	20.3	0.2
Jeraldean- Clandestine- W30	20	NO INFO														FLY (Pre-roll)- W23	20.3	NO INFO
Sunset Sherbet- Canna Organix- W30	20	NO INFO														Cookies and Cream- W35	20.3	0
Walker Sour- Clandestine- W30	20	NO INFO														Green Crack Pre-roll- W35	20.3	0
Afghani Diesel- W32	20	NO INFO														Purple Diesel Preroll- W35	20.3	0.5
Animal Cookies- W32	20	NO INFO														Grand Daddy Purple- W36	20.3	NO INFO
Blackberry Diesel- W32	20	NO INFO														Allen Wrench- W37	20.3	0.3
24K Gold Preroll- W32	20	NO INFO														LR- Ghost Breath Preroll- W28	20.31	0
Canyland Preroll- W32	20	NO INFO														BC- Barewee Preroll- W28	20.33	0.19
Strawberry Banana Preroll- W32	20	NO INFO														Blackberry Kush- W32	20.34	0.2
Dutch Hawaiian- W33	20	0														Candyland Prerol- W32	20.36	0.16
Gooberry- W33	20	0														Blueberry- W1	20.4	NO INFO
Blackberry Cream- W33	20	0.2														Blue Afghani- Dutchy- W7a	20.4	NO INFO
GG4- W33	20	0.11														Pink Panther- Dutchy- W7a	20.4	0.5
Blue Dream- W33	20	0														Treedom- Grapefruit Rom- W9a	20.4	0.3
Purple Diesel- W35	20	0.2														Blue Dream Liberty Reach- W16a	20.4	NO INFO
Thai Mini- W36	20	NO INFO														Cookie Monster x Mango Haze Joint 1g High Five- W16a	20.4	NO INFO
Raskal Berries- W36	20	0.2														Lemon Marmalade Pre Roll Platinum Gardens- W16a	20.4	NO INFO
Fruity Pebbles B Bud- W36	20	NO INFO														Royal Kush Pre Rolll Soulshine- W16a	20.4	NO INFO
Alien Asshat- W36	20	NO INFO														DawgStr Fruity Pebbles- W9b	20.4	NO INFO
Kush Wreck- W36	20	NO INFO														Strawberry Fields- W22a	20.4	NO INFO
Cherry Pie- W37	20	0.08														Weedle- W25	20.4	NO INFO
Grand Daddy Purple- W1	20.02	NO INFO														HD- Mickey Kush- W28	20.4	0.18
Bay Dream- W32	20.02	0.09														Strawberry Cough Preroll- W32	20.4	0.22
Star Dawg Preroll- W33	20.02	0														White Fire OG- W33	20.4	0
Alaskan Thunder Fuck- W37	20.02	0.12														Animism- W33	20.4	0
Permafrost- W24	20.04	NO INFO														GTH x Tangie- W36	20.4	NO INFO
Orange Kush Paper Planes (pre-roll)- W37	20.04	1.11														Grape Ape- W37	20.4	0.3
Glookies -W2	20.07	0.05														Animal Cookies- W39	20.4	0.4
Sherbet Cookies- W25	20.07	NO INFO														Animal Cookies Joint- W39	20.4	0.4
Sherbet Cookies PreRoll- W25	20.07	NO INFO														BC- Grape Escape Preroll- W28	20.46	0.1
Marmalade- W37	20.08	0														Rocket Cones (pre-roll)- W37	20.46	0.09
Super Sour Diesel- Golden Tree- W7a	20.1	NO INFO														LSD Joint- W39	20.46	1.14
Applie Pie- Freddy's Fuego- W7a	20.1	NO INFO														Taho OG Kush- W24	20.48	NO INFO
Pamelina- From the Soil- W7a	20.1	NO INFO														Matanuska 47- W39	20.48	0.19
Pearl- 1937 Farms- W7a	20.1	NO INFO														Island Poison- Treehawk Farms- W7a	20.5	NO INFO
XJ-13- Solstice Tradition- W7a	20.1	NO INFO														Peaches and Diesel- W12	20.5	0
Knights Hemplar- Kings Kush- W9a	20.1	0.4														Forum Cut GSC Forte Farms- W16a	20.5	0.2
Animal Tangry by Washington State Sweet Leaf Gardens- W18	20.1	0.1														Jack Herer Dream City- W16a	20.5	NO INFO
Tangie by Lazy Bee- W18	20.1	0.4														Pink Cookies NWCS Minis- W16a	20.5	No INFO
Dutch Berry Popcorn Buds Artizen- W16a	20.1	0.3														Rude Boi OG Pre Roll 1g Forte- W16a	20.5	No INFO
Tangie 1937 Farms- W16a	20.1	NO INFO														Vodis Candyland- W9b	20.5	1.2
Tavo Happy cannabis- W16a	20.1	NO INFO														SPP Cinderella's Dream (Sativa Preroll)- W9b	20.5	0.4
Dawg Star Dog Walker- W9b	20.1	NO INFO														Greatful Puff- Fire House- W20a	20.5	NO INFO
Raspberry Kush- Inflorescence- W20a	20.1	NO INFO														3 Kings- W23	20.5	NO INFO
Pamelina- W23	20.1	NO INFO														Flo OG- W24	20.5	NO INFO
Maui Suer Dawg- W24	20.1	NO INFO														Purple OG- W24	20.5	NO INFO
Blue Cookies- W24	20.1	NO INFO														Blackberry- W25	20.5	1.26
Cherry Pie- W24	20.1	NO INFO														Crash Landing- W25	20.5	NO INFO
Afgooberry- W24	20.1	NO INFO														Skywalker OG- W32	20.5	NO INFO
DS- Lemon Drop- W28	20.1	0.03														Rudeboi OG- W36	20.5	No INFO
Alien OG- W33	20.1	0														Gelato- W36	20.5	NO INFO
Flower Sloop's OG- W34	20.1	NO INFO														Bubba Kush- W33	20.53	0
Joint Sloop's OG (preroll)- W34	20.1	NO INFO														Grape Ape- W25	20.55	NO INFO
Animal Tangry- W35	20.1	0.1														Chocolope- W32	20.56	0.23
Tangie- W35	20.1	0.4														Black Cherry Soda- W37	20.57	1.52
Blackberry Preroll- W35	20.1	0.2														The Pineapple- W37	20.57	0.15
Hawaiian Dream- W36	20.1	0.7														Allen Wrench- W25	20.575	NO INFO
Blueberry Shortcake- W36	20.1	NO INFO														Dutchberry Preroll- W33	20.59	0
WD-40- W36	20.1	No INFO														Jager- W1	20.6	NO INFO
Goji OG- W36	20.1	NO INFO														Berry White Budlets- Dama- W7a	20.6	0.3
RYO One Love- W1	20.12	NO INFO														Sour Cookies- WEED- W7a	20.6	0.4
5 P's #3- W32	20.12	0.19														Allen Wrench Artizen- W16a	20.6	NO INFO
Sloop's OG- W39	20.12	0														GTH x Tangie From the Soil- W16a	20.6	NO INFO
Purple Pie- W32	20.13	0.09														Harambe C&D- W16a	20.6	NO INFO
Black Afghan by TreeHawk Farms- W8	20.14	0.09														Super Lemon Kush High Five Farms- W16a	20.6	0.2
CA- Cherry Ak- W28	20.14	0.4														UW Cannaman Farms- W16a	20.6	NO INFO
Fk- Chocolate NY Disel Preroll- W28	20.14	2.45														Space Turtle Pre Roll 1g Honu- W16a	20.6	No INFO
Gorilla Glue #4- W24	20.15	NO INFO														Blackberry Pie- W21a	20.6	0.5
The Pineapple Preroll- W33	20.15	0														Blackberry Kush- W24	20.6	NO INFO
Hellfire-W32	20.16	0.09														Blu Hawaiian- W25	20.6	NO INFO
Snoop's Dream- W25	20.18	NO INFO														RW- Blackberry Kush- W28	20.6	0.2
Pineapple Kush-W2	20.2	0.05														Bruce Banner 3- W33	20.6	0
Candy Apple- Treehawk Farms- W7a	20.2	NO INFO														Nookie- W33	20.6	0
Soulshine- Narnia- W9a	20.2	NO INFO														Loud Berry- W33	20.6	0
OMG- GSC Berners Cut OMG- W9a	20.2	NO INFO														Shake Chocolope- W34	20.6	NO INFO
Western Cultured- Banana Split- W9a	20.2	NO INFO														Joints Chocolope (Preroll)- W34	20.6	No INFO
Stardawg- W12	20.2	0														Green Treat Preroll- W35	20.6	0
Atf x GE Dream Ciy- W16a	20.2	NO INFO														Super Lemon Haze Preroll- W35	20.6	0.4
LA Confidential Freddy's Fuego- W16a	20.2	NO INFO														Lemon OG x Chemdawg- W39	20.61	0.08
Green Dream Pre Roll Forte Farms- W16a	20.2	NO INFO														Pitbull- W33	20.64	0.19
Vodis Doctor Doctor (Sativa Preroll)- W9b	20.2	NO INFO														Death Star- W32	20.66	1.7
Leef Kush Dream 3 (Indica Preroll)- W9b	20.2	No INFO														Trim Dirty White Girl- W2	20.67	0
Banana Split- Western Cultured- W20a	20.2	NO INFO														Wifi GSC-W2	20.67	0.09
A.T.F.- W23	20.2	NO INFO														Micky Kush- W25	20.675	NO INFO
Blackberry Cream (Pre-roll)- W23	20.2	NO INFO														Tangerine Haze- W37	20.69	0.6
Cookie Push- W24	20.2	NO INFO														Strawberry Cough- Headlight- W7a	20.7	0.7
Sour Urkle- W24	20.2	NO INFO														American Pie- Silver Series- W7a	20.7	NO INFO
ART- Blue Dream Preroll- W28	20.2	0														Chem Sensi- From the Soil- W7a	20.7	NO INFO
Jesus OG- W32	20.2	0														Chernobyl Budlets- Dama- W7a	20.7	NO INFO
Blue Cookies Preroll- W32	20.2	NO INFO														Double Tangie Banana- Golden Tree- W7a	20.7	NO INFO
Heavy Duty Fruity Preroll- W33	20.2	0														Dama- Glue- W9a	20.7	0.6
Wi-Fi Preroll- W33	20.2	0														Pbb X Sss by Weed Bush Lovers- W18	20.7	0
Royal Kush- W36	20.2	NO INFO														Gooberry Artizen- W16a	20.7	NO INFO
BUDDHA- ATF preroll- W28	20.22	0														Nepalese Oaxaca Sonic Green- W16a	20.7	NO INFO
Berry White- W37	20.22	0														SPP Plushberry (Indica Preroll)- W9b	20.7	0.2
Major Tom- W23	20.24	NO INFO														Blue Dream- Artizen- W20a	20.7	0.3
Durban Poison- W25	20.24	NO INFO														Spiritual Punk- W23	20.7	NO INFO
CPK Prerolls- W25	20.25	1.52														Long Beach Sour Diesel- W25	20.7	NO INFO
Green Crack- W24	20.255	NO INFO														Blueberry Haze- W25	20.7	NO INFO
Tangerine Dream- W24	20.28	NO INFO														FG- Blackberry Kush- W28	20.7	0
Grandaddy Purple- W32	20.28	0.14														Goji OG- W33	20.7	0
Girl Scout Cookies- W32	20.28	0.1														Flower Middlefork- W34	20.7	NO INFO
Prism #1- W37	20.29	0.73														Pbb X Sss- W35	20.7	0
True OG Joint- W39	20.29	0.29														5 P's- W36	20.7	0.2
Secret Recipe- W1	20.3	NO INFO														Blue Dream- W37	20.7	0.2
Cherry OG- American Weed Company- W7a	20.3	NO INFO														Tsi Fly- W37	20.7	0.19
Dutchberry- Artizen- W7a	20.3	0.2														Romulan- W23	20.73	NO INFO
Fire OG- Dutchy- W7a	20.3	NO INFO														Snoop's Dream- W33	20.73	0
Lierty OG- Jackpot Seaweed- W7a	20.3	NO INFO														Serious Happiness- W24	20.75	NO INFO
Maui Wowie Trim- Sweet Leaf & Kief- W7a	20.3	NO INFO														Purple Lemon Haze PreRoll- W25	20.77	NO INFO
Soulshine- Himalayan Blackberry- W9a	20.3	NO INFO														Sugar Mama- Cleric- W7a	20.8	NO INFO
Treedom- Blue Bastard- W9a	20.3	NO INFO														Sunset Sherbert- Exotikz- W7a	20.8	2.1
Cookies and Cream by Methow Horticulture- W18	20.3	0														Epoxy OG Joint 1g Triumph- W16a	20.8	NO INFO
Golden Ticket Liberty Reach- W16a	20.3	NO INFO														Leef Girl Scout Cookie (Hybrid Pre-Roll)- W9b	20.8	No INFO
Hammerhead High Five Farms- W16a	20.3	0.7														SPP Cinderella's Dream (Sativa Preroll)- W9b	20.8	NO INFO
Jack Herer Rochester Farms- W16a	20.3	0.5														Alien Orane Cookies- W24	20.8	NO INFO
Lemon Marmalade Platinum Gardens- W16a	20.3	NO INFO														Snowland PreRoll- W25	20.8	NO INFO
Orange Velvet Sonic Green- W16a	20.3	0.2														ELLA- GSC Preroll- W28	20.8	0
Plushberry Elements- W16a	20.3	NO INFO														Black Afghan Preroll- W32	20.8	NO INFO
Sour Amnesia Forte- W16a	20.3	NO INFO														Tahoe OG- W33	20.8	0
Berry White Pre Roll 1g Forte- W16a	20.3	0.4														Gummo #3- W36	20.8	NO INFO
Jilly Bean Pre Roll 1g Lazy Bee- W16a	20.3	0.6														Death Blossom Bong Buddies- W36	20.8	NO INFO
Dirty White Girl- Evergrow Northwest- W20a	20.3	NO INFO														True OG- W36	20.8	NO INFO
Jazz- Medusa- W20a	20.3	NO INFO														RYO Blue Cheese- W1	20.81	NO INFO
UW Purple- Dawg Star- W20a	20.3	NO INFO														Animal Cookies- W25	20.81	NO INFO
Alice in Wonderland- W21a	20.3	0.2														Grapefruit- W1	20.83	NO INFO
FLY (Pre-roll)- W23	20.3	NO INFO														Fruty Pebbles- W1	20.83	NO INFO
Cookies and Cream- W35	20.3	0														K2- W25	20.83	NO INFO
Green Crack Pre-roll- W35	20.3	0														Landerberr- W25	20.83	NO INFO
Purple Diesel Preroll- W35	20.3	0.5														BC- Durban Poison- W28	20.83	0
Grand Daddy Purple- W36	20.3	NO INFO														K2 Preroll- W33	20.83	0
Allen Wrench- W37	20.3	0.3														ELLA- Blackberry Kush Preroll- W28	20.84	0
LR- Ghost Breath Preroll- W28	20.31	0														Hindu Kush Pre-Roll- W32	20.88	0.02
BC- Barewee Preroll- W28	20.33	0.19														Alaskan Thunder Fuck- Dama- W7a	20.9	0.6
Blackberry Kush- W32	20.34	0.2														God's Gift- Nebula- W7a	20.9	NO INFO
Candyland Prerol- W32	20.36	0.16														Animal Cookies Elevate- W16a	20.9	NO INFO
Blueberry- W1	20.4	NO INFO														Candyland Banano Buds- W16a	20.9	NO INFO
Blue Afghani- Dutchy- W7a	20.4	NO INFO														Green Dream Forte- W16a	20.9	NO INFO
Pink Panther- Dutchy- W7a	20.4	0.5														Lodi Dodi Soulshine- W16a	20.9	NO INFO
Treedom- Grapefruit Rom- W9a	20.4	0.3														Rainbow Jones Olympia Cannabis- W16a	20.9	No INFO
Blue Dream Liberty Reach- W16a	20.4	NO INFO														Velvet Pie Liberty Reach- W16a	20.9	NO INFO
Cookie Monster x Mango Haze Joint 1g High Five- W16a	20.4	NO INFO														XJ-13 Noble Farms- W16a	20.9	NO INFO
Lemon Marmalade Pre Roll Platinum Gardens- W16a	20.4	NO INFO														Hawaiian Snow- W21a	20.9	0.2
Royal Kush Pre Rolll Soulshine- W16a	20.4	NO INFO														Cookies N Cream- W32	20.9	0.1
DawgStr Fruity Pebbles- W9b	20.4	NO INFO														Star Fighter- W33	20.9	0
Strawberry Fields- W22a	20.4	NO INFO														White Fire 43- W36	20.9	NO INFO
Weedle- W25	20.4	NO INFO														Sundae Driver #12- W36	20.9	NO INFO
HD- Mickey Kush- W28	20.4	0.18														Dutchberry- W37	20.9	0.2
Strawberry Cough Preroll- W32	20.4	0.22														Sour Diesel (pre-roll)- W37	20.9	0.1
White Fire OG- W33	20.4	0														Green Crack- W6	20.92	NO INFO
Animism- W33	20.4	0														FK- Ayahuasca Purple- W28	20.93	0
GTH x Tangie- W36	20.4	NO INFO														Sour Tangie- W32	20.93	0
Grape Ape- W37	20.4	0.3														LR- Training Day Preroll- W28	20.95	0
Animal Cookies- W39	20.4	0.4														Maui Waui Trim- W2	20.97	0.06
Animal Cookies Joint- W39	20.4	0.4														Liberty Haze- W1	20.98	NO INFO
BC- Grape Escape Preroll- W28	20.46	0.1														Sherbert- W32	20.99	0.38
Rocket Cones (pre-roll)- W37	20.46	0.09														Sour LSD- W39	20.99	0
LSD Joint- W39	20.46	1.14														Snozzberry- W4a	21	NO INFO
Taho OG Kush- W24	20.48	NO INFO														Grapefruit- W4a	21	NO INFO
Matanuska 47- W39	20.48	0.19														Do-Si-Dos- W4a	21	NO INFO
Island Poison- Treehawk Farms- W7a	20.5	NO INFO														Orange Kush- W4a	21	NO INFO
Peaches and Diesel- W12	20.5	0														Sunset Sherbert- W4a	21	NO INFO
Forum Cut GSC Forte Farms- W16a	20.5	0.2														Green Dream- W4a	21	NO INFO
Jack Herer Dream City- W16a	20.5	NO INFO														Grease Monkey- W4a	21	NO INFO
Pink Cookies NWCS Minis- W16a	20.5	No INFO														Blue Dream- W4a	21	NO INFO
Rude Boi OG Pre Roll 1g Forte- W16a	20.5	No INFO														Wonder Woman- W4a	21	NO INFO
Vodis Candyland- W9b	20.5	1.2														Green Crack- W6	21	NO INFO
SPP Cinderella's Dream (Sativa Preroll)- W9b	20.5	0.4														Allen Wrench- Nebula- W7a	21	NO INFO
Greatful Puff- Fire House- W20a	20.5	NO INFO														White Russian Budlets- Dama- W7a	21	NO INFO
3 Kings- W23	20.5	NO INFO														White Walker- Firebros- W7a	21	NO INFO
Flo OG- W24	20.5	NO INFO														Phat Panda- Strawberry Banana- W9a	21	0.9
Purple OG- W24	20.5	NO INFO														Glurilla Platinum Gardens- W16a	21	NO INFO
Blackberry- W25	20.5	1.26														Cookies n Cream #2 Pre Roll 1.5g 1937 Farms- W16a	21	NO INFO
Crash Landing- W25	20.5	NO INFO														Knights Hemplar Afgooey (Indica Preroll)- W9b	21	NO INFO
Skywalker OG- W32	20.5	NO INFO														Blue Cookieberry Crunch- W21a	21	0.4
Rudeboi OG- W36	20.5	No INFO														Agent Gorilla- W22a	21	NO INFO
Gelato- W36	20.5	NO INFO														Dutchberry- W22a	21	NO INFO
Bubba Kush- W33	20.53	0														Green Crack From Heavyweight- W22a	21	NO INFO
Grape Ape- W25	20.55	NO INFO														Ounces from Florigen- W22a	21	NO INFO
Chocolope- W32	20.56	0.23														Super Lemon Haze- W22a	21	NO INFO
Black Cherry Soda- W37	20.57	1.52														Big Black- W22a	21	NO INFO
The Pineapple- W37	20.57	0.15														Gorilla Glue #4 From Natural Mystic- W22a	21	NO INFO
Allen Wrench- W25	20.575	NO INFO														Ounces from Florigen- W22a	21	NO INFO
Dutchberry Preroll- W33	20.59	0														Snow Leopard- W22a	21	NO INFO
Jager- W1	20.6	NO INFO														Pre Rolls from Cannasol- W22a	21	NO INFO
Berry White Budlets- Dama- W7a	20.6	0.3														True OG- W23	21	No INFO
Sour Cookies- WEED- W7a	20.6	0.4														Critical Plus (Pre-roll)- W23	21	NO INFO
Allen Wrench Artizen- W16a	20.6	NO INFO														Zombie OG- W4b	21	NO INFO
GTH x Tangie From the Soil- W16a	20.6	NO INFO														Orange Kush- W4b	21	NO INFO
Harambe C&D- W16a	20.6	NO INFO														Pennywise- W4b	21	21
Super Lemon Kush High Five Farms- W16a	20.6	0.2														Training Day- W4b	21	NO INFO
UW Cannaman Farms- W16a	20.6	NO INFO														Huckleberry- W4b	21	NO INFO
Space Turtle Pre Roll 1g Honu- W16a	20.6	No INFO														Blueberry Silvertip- W4b	21	NO INFO
Blackberry Pie- W21a	20.6	0.5														Soul Safari- W4b	21	NO INFO
Blackberry Kush- W24	20.6	NO INFO														Optimus Prime- W4b	21	NO INFO
Blu Hawaiian- W25	20.6	NO INFO														Sherbert- W4b	21	NO INFO
RW- Blackberry Kush- W28	20.6	0.2														OJ Kush Breath- W4b	21	NO INFO
Bruce Banner 3- W33	20.6	0														Black Cherry OG- W4b	21	NO INFO
Nookie- W33	20.6	0														Rick Jones- W4b	21	NO INFO
Loud Berry- W33	20.6	0														Buddy Boy Surprise- W4b	21	NO INFO
Shake Chocolope- W34	20.6	NO INFO														ATF- W4b	21	NO INFO
Joints Chocolope (Preroll)- W34	20.6	No INFO														Orange Fruity Pebbles- W4b	21	NO INFO
Green Treat Preroll- W35	20.6	0														Kush Dream- W4b	21	NO INFO
Super Lemon Haze Preroll- W35	20.6	0.4														Alien preroll- W4b	21	NO INFO
Lemon OG x Chemdawg- W39	20.61	0.08														Dutch Treat- W4b	21	NO INFO
Pitbull- W33	20.64	0.19														Dosido's preroll- W4b	21	NO INFO
Death Star- W32	20.66	1.7														Ghost of LeeRoy- W25	21	NO INFO
Trim Dirty White Girl- W2	20.67	0														Espresso- W25	21	NO INFO
Wifi GSC-W2	20.67	0.09														Illumidodi PreRolls- W25	21	NO INFO
Micky Kush- W25	20.675	NO INFO														MK Ultra PreRoll- W25	21	NO INFO
Tangerine Haze- W37	20.69	0.6														MB- FruitPunch- W28	21	0.15
Strawberry Cough- Headlight- W7a	20.7	0.7														Dutch Treat- Sysco Pancho- W30	21	NO INFO
American Pie- Silver Series- W7a	20.7	NO INFO														Pineapple Chunk- W30	21	NO INFO
Chem Sensi- From the Soil- W7a	20.7	NO INFO														Super Lemon Kush- W30	21	NO INFO
Chernobyl Budlets- Dama- W7a	20.7	NO INFO														Dutch Treat- Sysco Pancho- W30	21	NO INFO
Double Tangie Banana- Golden Tree- W7a	20.7	NO INFO														Pineapple Chunk- W30	21	NO INFO
Dama- Glue- W9a	20.7	0.6														Super Lemon Kush- W30	21	NO INFO
Pbb X Sss by Weed Bush Lovers- W18	20.7	0														Limesicle Preroll- W32	21	0.1
Gooberry Artizen- W16a	20.7	NO INFO														Gelato Preroll- W33	21	1
Nepalese Oaxaca Sonic Green- W16a	20.7	NO INFO														Flower Banana Punch #2- W34	21	NO INFO
SPP Plushberry (Indica Preroll)- W9b	20.7	0.2														True OG Bong Buddies- W36	21	NO INFO
Blue Dream- Artizen- W20a	20.7	0.3														Big E- W36	21	0.7
Spiritual Punk- W23	20.7	NO INFO														Sinfully Sour Mini- W36	21	NO INFO
Long Beach Sour Diesel- W25	20.7	NO INFO														American Beauty- W36	21	NO INFO
Blueberry Haze- W25	20.7	NO INFO														Locktight- W36	21	NO INFO
FG- Blackberry Kush- W28	20.7	0														Prism #1- W37	21	No INFO
Goji OG- W33	20.7	0														Critical Mass (pre-roll)- W37	21	0.3
Flower Middlefork- W34	20.7	NO INFO														OG Kush-W2	21.03	0
Pbb X Sss- W35	20.7	0														707 Headband- W32	21.03	0.29
5 P's- W36	20.7	0.2														BC- Durban Poison Preroll- W28	21.04	0
Blue Dream- W37	20.7	0.2														ELLA- Purple Kush Preroll- W28	21.04	0.1
Tsi Fly- W37	20.7	0.19														Critique Joint (pre-roll)- W37	21.09	0.07
Romulan- W23	20.73	NO INFO														Afgooey- W39	21.09	0.03
Snoop's Dream- W33	20.73	0														Nana Pie- W1	21.1	NO INFO
Serious Happiness- W24	20.75	NO INFO														Wifi 43- Phat Panda- W7a	21.1	NO INFO
Purple Lemon Haze PreRoll- W25	20.77	NO INFO														Pineapple Kush- REUP- W7a	21.1	NO INFO
Sugar Mama- Cleric- W7a	20.8	NO INFO														9lb Hammer by TreeHawk Farms- W8	21.1	0.09
Sunset Sherbert- Exotikz- W7a	20.8	2.1														Jack Herer Popcorn Buds Red Frog- W16a	21.1	NO INFO
Epoxy OG Joint 1g Triumph- W16a	20.8	NO INFO														Querkle Root Down- W16a	21.1	NO INFO
Leef Girl Scout Cookie (Hybrid Pre-Roll)- W9b	20.8	No INFO														NorCal Blue 1g Pre Roll RD- W16a	21.1	No INFO
SPP Cinderella's Dream (Sativa Preroll)- W9b	20.8	NO INFO														Candyland- Pono- W20a	21.1	0.4
Alien Orane Cookies- W24	20.8	NO INFO														Candyland- Pono (Pre-roll)- W20a	21.1	0.4
Snowland PreRoll- W25	20.8	NO INFO														Super Lemon Haze- W24	21.1	NO INFO
ELLA- GSC Preroll- W28	20.8	0														Cherry Magoo- W24	21.1	No INFO
Black Afghan Preroll- W32	20.8	NO INFO														Sunset Sherbet- W25	21.1	NO INFO
Tahoe OG- W33	20.8	0														RW Super Lemon Haze- W28	21.1	2.3
Gummo #3- W36	20.8	NO INFO														RW- Cherry Magoo- W28	21.1	0
Death Blossom Bong Buddies- W36	20.8	NO INFO														Presidential OG- W36	21.1	NO INFO
True OG- W36	20.8	NO INFO														Abusive OG- W36	21.1	NO INFO
RYO Blue Cheese- W1	20.81	NO INFO														Lemon Wreck Popcorn- W36	21.1	NO INFO
Animal Cookies- W25	20.81	NO INFO														Mint Choc Chip- W36	21.1	NO INFO
Grapefruit- W1	20.83	NO INFO														Black Jesus- W36	21.1	NO INFO
Fruty Pebbles- W1	20.83	NO INFO														UK Cheese-W2	21.11	0.07
K2- W25	20.83	NO INFO														Ghost OG Preroll- W33	21.14	0
Landerberr- W25	20.83	NO INFO														Super Glue- W37	21.14	0.45
BC- Durban Poison- W28	20.83	0														Frankenstein- W12	21.15	0
K2 Preroll- W33	20.83	0														DOPE- Purple Cheddar Preroll- W28	21.17	0.1
ELLA- Blackberry Kush Preroll- W28	20.84	0														Cheesequake- W24	21.195	No INFO
Hindu Kush Pre-Roll- W32	20.88	0.02														Black Cherry Soda- Willie's Reserve- W7a	21.2	NO INFO
Alaskan Thunder Fuck- Dama- W7a	20.9	0.6														Pitbull- American Weed Company- W7a	21.2	0.2
God's Gift- Nebula- W7a	20.9	NO INFO														Pure Kush- Washington Bud Company- W7a	21.2	0.2
Animal Cookies Elevate- W16a	20.9	NO INFO														Purple Pie- Freddy's Fuego- W7a	21.2	NO INFO
Candyland Banano Buds- W16a	20.9	NO INFO														Black Cherry Soda Rochester Farms- W16a	21.2	NO INFO
Green Dream Forte- W16a	20.9	NO INFO														Super Sour Diesel Soulshine- W16a	21.2	No INFO
Lodi Dodi Soulshine- W16a	20.9	NO INFO														Banana Pre Roll 1g Lazy Bee- W16a	21.2	0.6
Rainbow Jones Olympia Cannabis- W16a	20.9	No INFO														Cascade Crest Blueberry Cheesecake- W9b	21.2	No INFO
Velvet Pie Liberty Reach- W16a	20.9	NO INFO														Gorilla Glue- Rocket Cannabis- W20a	21.2	NO INFO
XJ-13 Noble Farms- W16a	20.9	NO INFO														Sunset Sherbet- NWCS Solutions- W20a	21.2	NO INFO
Hawaiian Snow- W21a	20.9	0.2														Dream Beaver- Phat Panda (Pre-roll)- W20a	21.2	0.2
Cookies N Cream- W32	20.9	0.1														Kiona Gold- W21a	21.2	NO INFO
Star Fighter- W33	20.9	0														Wedding Cake (Pre-roll)- W23	21.2	NO INFO
White Fire 43- W36	20.9	NO INFO														GG #4- W24	21.2	NO INFO
Sundae Driver #12- W36	20.9	NO INFO														Alaskan Thunder Fuck- W24	21.2	No INFO
Dutchberry- W37	20.9	0.2														Blue Cookies- W25	21.2	NO INFO
Sour Diesel (pre-roll)- W37	20.9	0.1														MB- 9lb Hammer- W28	21.2	0
Green Crack- W6	20.92	NO INFO														DOPE- Gorilla Warfare Preroll- W28	21.2	0
FK- Ayahuasca Purple- W28	20.93	0														Blueberry Shortcake- W32	21.2	NO INFO
Sour Tangie- W32	20.93	0														Blueberry Diesel- W32	21.2	0.1
LR- Training Day Preroll- W28	20.95	0														Blueberry Diesel Preroll- W32	21.2	0.1
Maui Waui Trim- W2	20.97	0.06														Flower Blueberry Silvertip- W34	21.2	NO INFO
Liberty Haze- W1	20.98	NO INFO														Joint Project Cherry Pie (Preroll)- W34	21.2	No INFO
Sherbert- W32	20.99	0.38														Joint OG Cookies (Preroll)- W34	21.2	NO INFO
Sour LSD- W39	20.99	0														Panda Cookies- W36	21.2	NO INFO
Snozzberry- W4a	21	NO INFO														Professor Chaos- W25	21.25	NO INFO
Grapefruit- W4a	21	NO INFO														Blue Dream- W2	21.26	0
Do-Si-Dos- W4a	21	NO INFO														Platinum OG-W2	21.27	0
Orange Kush- W4a	21	NO INFO														Gummo Joint (pre-roll)- W37	21.27	0.09
Sunset Sherbert- W4a	21	NO INFO														Shangri-ia- W23	21.29	No INFO
Green Dream- W4a	21	NO INFO														Shangri-ia (Pre-roll)- W23	21.29	NO INFO
Grease Monkey- W4a	21	NO INFO														Cinex- Dutchy- W7a	21.3	NO INFO
Blue Dream- W4a	21	NO INFO														Purple Master- Lopez and Orr- W7a	21.3	0.2
Wonder Woman- W4a	21	NO INFO														Eco Budz- Ultra Violet- W9a	21.3	NO INFO
Green Crack- W6	21	NO INFO														Liberty Reach- Shaved Ice- W9a	21.3	NO INFO
Allen Wrench- Nebula- W7a	21	NO INFO														Quality- Strawberry Banana Sherbert- Jar- W9a	21.3	0.2
White Russian Budlets- Dama- W7a	21	NO INFO														Space Queen Pre Roll Artizen- W16a	21.3	NO INFO
White Walker- Firebros- W7a	21	NO INFO														CascadeCrest Golden Sunrise- W9b	21.3	NO INFO
Phat Panda- Strawberry Banana- W9a	21	0.9														Chill (Pre-roll)- W23	21.3	NO INFO
Glurilla Platinum Gardens- W16a	21	NO INFO														Acapulco Gold- W24	21.3	NO INFO
Cookies n Cream #2 Pre Roll 1.5g 1937 Farms- W16a	21	NO INFO														Pineapple Chunk- W24	21.3	No INFO
Knights Hemplar Afgooey (Indica Preroll)- W9b	21	NO INFO														Moonshine Haze- W25	21.3	NO INFO
Blue Cookieberry Crunch- W21a	21	0.4														Blue Star- GG4- W33	21.3	0.36
Agent Gorilla- W22a	21	NO INFO														Tillamook Strawberry- W6	21.32	NO INFO
Dutchberry- W22a	21	NO INFO														Sour Diesel- W25	21.32	No INFO
Green Crack From Heavyweight- W22a	21	NO INFO														Green Queen- W37	21.32	0.18
Ounces from Florigen- W22a	21	NO INFO														Lemon Haze- W32	21.34	NO INFO
Super Lemon Haze- W22a	21	NO INFO														Green Crack Joint (pre-roll)- W37	21.34	0.52
Big Black- W22a	21	NO INFO														Purple Lemon Haze- Golden Tree- W7a	21.4	NO INFO
Gorilla Glue #4 From Natural Mystic- W22a	21	NO INFO														Tangie Cookies- Exotikz- W7a	21.4	NO INFO
Ounces from Florigen- W22a	21	NO INFO														Timewreck- House of Cultivar- W7a	21.4	NO INFO
Snow Leopard- W22a	21	NO INFO														NWCS- Super Lemon Haze- W9a	21.4	No INFO
Pre Rolls from Cannasol- W22a	21	NO INFO														Harmony Farms- AK-47- W9a	21.4	No INFO
True OG- W23	21	No INFO														Cherry Pie by Washington State Sweet Leaf Gardens- W18	21.4	0.9
Critical Plus (Pre-roll)- W23	21	NO INFO														True OG 1g Pre Roll Northwest Grown- W16a	21.4	NO INFO
Zombie OG- W4b	21	NO INFO														Phat Panda Cenex- W9b	21.4	0.4
Orange Kush- W4b	21	NO INFO														Bay Dream - Fifty Fold - W20a	21.4	NO INFO
Pennywise- W4b	21	21														Pink Lemonade- Rochester Farms- W20a	21.4	0.6
Training Day- W4b	21	NO INFO														Hindu Tahoe- Pono (Pre-roll)- W20a	21.4	0.3
Huckleberry- W4b	21	NO INFO														Fruit Loops (Pre-roll)- W23	21.4	NO INFO
Blueberry Silvertip- W4b	21	NO INFO														Loud Berry (Pre-roll)- W23	21.4	No INFO
Soul Safari- W4b	21	NO INFO														Northern Lights- W24	21.4	NO INFO
Optimus Prime- W4b	21	NO INFO														Lemon OG- W24	21.4	No INFO
Sherbert- W4b	21	NO INFO														Dutch Queen- W24	21.4	NO INFO
OJ Kush Breath- W4b	21	NO INFO														Orange Kush Trim- W25	21.4	NO INFO
Black Cherry OG- W4b	21	NO INFO														ELLA- Docs OG- W28	21.4	0
Rick Jones- W4b	21	NO INFO														ELLA- Docs OG Preroll- W28	21.4	0.06
Buddy Boy Surprise- W4b	21	NO INFO														Ultraviolet- W32	21.4	0
ATF- W4b	21	NO INFO														Cherry Pie- W35	21.4	0.9
Orange Fruity Pebbles- W4b	21	NO INFO														Sunset Sherbet- W36	21.4	NO INFO
Kush Dream- W4b	21	NO INFO														OZ Kush- w36	21.4	No INFO
Alien preroll- W4b	21	NO INFO														Royal Purple Bong Buddies- W36	21.4	NO INFO
Dutch Treat- W4b	21	NO INFO														Hurricane- W37	21.4	0.15
Dosido's preroll- W4b	21	NO INFO														Sour Cyclone (CBD)- W37	21.4	0.57
Ghost of LeeRoy- W25	21	NO INFO														Blue Dream Preroll- W32	21.42	0
Espresso- W25	21	NO INFO														Rio Negro- W25	21.44	NO INFO
Illumidodi PreRolls- W25	21	NO INFO														ELLA- Lemon Alien Dawg- W28	21.45	0.05
MK Ultra PreRoll- W25	21	NO INFO														ELLA- Alien Dawg- W28	21.45	0.05
MB- FruitPunch- W28	21	0.15														Critical Kush- W32	21.45	0
Dutch Treat- Sysco Pancho- W30	21	NO INFO														Ak- 47- W33	21.47	0.04
Pineapple Chunk- W30	21	NO INFO														Hybrid Mix Preroll- W33	21.48	0.08
Super Lemon Kush- W30	21	NO INFO														Narnia- Soulshine- W7a	21.5	0.7
Dutch Treat- Sysco Pancho- W30	21	NO INFO														Cookies- Gabriel- W7a	21.5	0.3
Pineapple Chunk- W30	21	NO INFO														Sherbert- Gabriel- W7a	21.5	NO INFO
Super Lemon Kush- W30	21	NO INFO														Pink Cookies- Private Reserve- W7a	21.5	NO INFO
Limesicle Preroll- W32	21	0.1														Skywalker OG- Willie's Reserve- W7a	21.5	No INFO
Gelato Preroll- W33	21	1														Eco Budz- LAGG- W9a	21.5	NO INFO
Flower Banana Punch #2- W34	21	NO INFO														Berry White- W12	21.5	0
True OG Bong Buddies- W36	21	NO INFO														Amnesia Haze Virginia Company- W16a	21.5	NO INFO
Big E- W36	21	0.7														Kali Cannaman Farms- W16a	21.5	NO INFO
Sinfully Sour Mini- W36	21	NO INFO														Kali Mist Cannaman Farms- W16a	21.5	NO INFO
American Beauty- W36	21	NO INFO														Lamb's Bread Sour Diesel Hemp Kings- W16a	21.5	0.2
Locktight- W36	21	NO INFO														Purple Punch High Five Farms- W16a	21.5	No INFO
Prism #1- W37	21	No INFO														Shiatsu Kush Root Down- W16a	21.5	NO INFO
Critical Mass (pre-roll)- W37	21	0.3														Sky Standard Dutch Treat- W9b	21.5	0.2
OG Kush-W2	21.03	0														Golden Pineapple- Phat Panda- W20a	21.5	0.4
707 Headband- W32	21.03	0.29														OG Chem- Virginia Company- W20a	21.5	NO INFO
BC- Durban Poison Preroll- W28	21.04	0														Candy Kush- W21a	21.5	0.6
ELLA- Purple Kush Preroll- W28	21.04	0.1														Golden Ticket From GTP- W22a	21.5	NO INFO
Critique Joint (pre-roll)- W37	21.09	0.07														Memory Loss- W24	21.5	NO INFO
Afgooey- W39	21.09	0.03														Fire OG- W25	21.5	3.5
Nana Pie- W1	21.1	NO INFO														Gorilla Glue #4- W32	21.5	0.1
Wifi 43- Phat Panda- W7a	21.1	NO INFO														Durban Poson Preroll- W33	21.5	0
Pineapple Kush- REUP- W7a	21.1	NO INFO														Flower Sloop's OG/ Alien Blood Joint (Preroll)- W34	21.5	No INFO
9lb Hammer by TreeHawk Farms- W8	21.1	0.09														Alien OG- W36	21.5	NO INFO
Jack Herer Popcorn Buds Red Frog- W16a	21.1	NO INFO														Sour Diesel- W1	21.51	NO INFO
Querkle Root Down- W16a	21.1	NO INFO														Dutch Treat- W23	21.52	NO INFO
NorCal Blue 1g Pre Roll RD- W16a	21.1	No INFO														Black Cherry Soda- W25	21.53	0.92
Candyland- Pono- W20a	21.1	0.4														Chocolope- W32	21.54	0.24
Candyland- Pono (Pre-roll)- W20a	21.1	0.4														Snoop's Dream Preroll- W33	21.56	0.06
Super Lemon Haze- W24	21.1	NO INFO														Sour Tangie- W37	21.56	0.32
Cherry Magoo- W24	21.1	No INFO														La Con Budlets- Dama- W7a	21.6	0.3
Sunset Sherbet- W25	21.1	NO INFO														Blueberry Cheesecake- Solstice Tradition- W7a	21.6	NO INFO
RW Super Lemon Haze- W28	21.1	2.3														Cherry Pie- Dutchy- W7a	21.6	NO INFO
RW- Cherry Magoo- W28	21.1	0														Lemon Meringue- Solstice Tradition- W7a	21.6	NO INFO
Presidential OG- W36	21.1	NO INFO														SPP- Bue Cinex- W9a	21.6	0.7
Abusive OG- W36	21.1	NO INFO														24k Gold Sonic Green- W16a	21.6	0.2
Lemon Wreck Popcorn- W36	21.1	NO INFO														Lamb's Bread Sour Diesel Shake Hemp Kings- W16a	21.6	NO INFO
Mint Choc Chip- W36	21.1	NO INFO														Super Lemon Haze Pre Roll 0.5g Liberty Reach- W16a	21.6	NO INFO
Black Jesus- W36	21.1	NO INFO														Knights Hemplar Power Kush (Indica Preroll)- W9b	21.6	0.2
UK Cheese-W2	21.11	0.07														God's Gift (Pre-roll)- W23	21.6	NO INFO
Ghost OG Preroll- W33	21.14	0														Lost Coast- W33	21.6	0.3
Super Glue- W37	21.14	0.45														Shake Death Star- W34	21.6	NO INFO
Frankenstein- W12	21.15	0														Flower Cookies N Cream- W34	21.6	NO INFO
DOPE- Purple Cheddar Preroll- W28	21.17	0.1														OG Kush- W36	21.6	NO INFO
Cheesequake- W24	21.195	No INFO														Do Si Dos- W36	21.6	NO INFO
Black Cherry Soda- Willie's Reserve- W7a	21.2	NO INFO														Petroleum Jelly- W37	21.6	0.11
Pitbull- American Weed Company- W7a	21.2	0.2														Lucky's Private Reserve- W37	21.61	0.18
Pure Kush- Washington Bud Company- W7a	21.2	0.2														GG #4- W37	21.63	0.18
Purple Pie- Freddy's Fuego- W7a	21.2	NO INFO														Blue Dream Joint- W39	21.63	0
Black Cherry Soda Rochester Farms- W16a	21.2	NO INFO														American Beauty- W39	21.65	0.01
Super Sour Diesel Soulshine- W16a	21.2	No INFO														Cuvee Joint- W39	21.65	1
Banana Pre Roll 1g Lazy Bee- W16a	21.2	0.6														Tangerine Dream- W1	21.66	NO INFO
Cascade Crest Blueberry Cheesecake- W9b	21.2	No INFO														Panda Snax Preroll- W32	21.67	0.36
Gorilla Glue- Rocket Cannabis- W20a	21.2	NO INFO														Purple Pleidas- W37	21.69	0.89
Sunset Sherbet- NWCS Solutions- W20a	21.2	NO INFO														Strawberry Mamba- W37	21.69	0.89
Dream Beaver- Phat Panda (Pre-roll)- W20a	21.2	0.2														Snoop's Dream- Dutchy- W7a	21.7	NO INFO
Kiona Gold- W21a	21.2	NO INFO														White Nightmare- Forbidden Farms- W7a	21.7	NO INFO
Wedding Cake (Pre-roll)- W23	21.2	NO INFO														Grand Daddy Purple- Phat Panda- W7a	21.7	0.4
GG #4- W24	21.2	NO INFO														Primus- W12	21.7	0
Alaskan Thunder Fuck- W24	21.2	No INFO														Phantom Cookies- W12	21.7	0
Blue Cookies- W25	21.2	NO INFO														Double Tangie Banana by Washington State Sweet Leaf Gardens- W18	21.7	0
MB- 9lb Hammer- W28	21.2	0														Elmer's Glue Liberty Reach- W16a	21.7	NO INFO
DOPE- Gorilla Warfare Preroll- W28	21.2	0														La Cofidential Pre-Rol 1g Artizen- W16a	21.7	NO INFO
Blueberry Shortcake- W32	21.2	NO INFO														Grape Cheese- Pono- W20a	21.7	0.3
Blueberry Diesel- W32	21.2	0.1														Pink Cookies- NWCS- W20a	21.7	NO INFO
Blueberry Diesel Preroll- W32	21.2	0.1														Grape Cheese- Pono (Pre-roll)- W20a	21.7	0.3
Flower Blueberry Silvertip- W34	21.2	NO INFO														Moonshine Haze- W23	21.7	NO INFO
Joint Project Cherry Pie (Preroll)- W34	21.2	No INFO														Royal Kush (Pre-roll)- W23	21.7	NO INFO
Joint OG Cookies (Preroll)- W34	21.2	NO INFO														Black Russian- W25	21.7	NO INFO
Panda Cookies- W36	21.2	NO INFO														Sweet Cheese- W25	21.7	NO INFO
Professor Chaos- W25	21.25	NO INFO														Cooks N Cream- W32	21.7	NO INFO
Blue Dream- W2	21.26	0														Flower Jack Dawg- W34	21.7	NO INFO
Platinum OG-W2	21.27	0														Double Tangie- W35	21.7	0
Gummo Joint (pre-roll)- W37	21.27	0.09														GG- W37	21.7	0.16
Shangri-ia- W23	21.29	No INFO														Rocket Cones (pre-roll)- W37	21.7	0.2
Shangri-ia (Pre-roll)- W23	21.29	NO INFO														Orange Cookies-W2	21.73	0
Cinex- Dutchy- W7a	21.3	NO INFO														DS- Blueberry Cheesecake- W28	21.74	0.05
Purple Master- Lopez and Orr- W7a	21.3	0.2														ART- Dutchberry- W28	21.76	0.28
Eco Budz- Ultra Violet- W9a	21.3	NO INFO														Blue Cheese- W39	21.77	0
Liberty Reach- Shaved Ice- W9a	21.3	NO INFO														LA Confidntial- W37	21.78	0
Quality- Strawberry Banana Sherbert- Jar- W9a	21.3	0.2														Lamb's Bread- W25	21.79	NO INFO
Space Queen Pre Roll Artizen- W16a	21.3	NO INFO														Swamp Boys Nookies- W1	21.8	NO INFO
CascadeCrest Golden Sunrise- W9b	21.3	NO INFO														Golden Tangie- Liberty Reach- W7a	21.8	NO INFO
Chill (Pre-roll)- W23	21.3	NO INFO														Artizen- Quantam Leap- W9a	21.8	0.5
Acapulco Gold- W24	21.3	NO INFO														Treedom- Jackie G- W9a	21.8	NO INFO
Pineapple Chunk- W24	21.3	No INFO														Ellensburg Blue by Binx Buds- W18	21.8	0
Moonshine Haze- W25	21.3	NO INFO														Romulan Soulshine - W16a	21.8	NO INFO
Blue Star- GG4- W33	21.3	0.36														Critical Plus Pre Roll 1g Root Down- W16a	21.8	0.3
Tillamook Strawberry- W6	21.32	NO INFO														Grape Ape Pre Roll 1g Artizen- W16a	21.8	NO INFO
Sour Diesel- W25	21.32	No INFO														Tahoe OG- Rootworx- W20a	21.8	0.2
Green Queen- W37	21.32	0.18														Dirty White Girl- Hi Guys (Pre-roll)- W20a	21.8	0.2
Lemon Haze- W32	21.34	NO INFO														Rawdawg- W24	21.8	NO INFO
Green Crack Joint (pre-roll)- W37	21.34	0.52														Lemon Amnesia- W32	21.8	NO INFO
Purple Lemon Haze- Golden Tree- W7a	21.4	NO INFO														Ellensburg Blue- W35	21.8	0
Tangie Cookies- Exotikz- W7a	21.4	NO INFO														White Rabbit- W36	21.8	NO INFO
Timewreck- House of Cultivar- W7a	21.4	NO INFO														Gorilla Glue Preroll- W32	21.81	0.09
NWCS- Super Lemon Haze- W9a	21.4	No INFO														GSC Joint- W39	21.84	0.9
Harmony Farms- AK-47- W9a	21.4	No INFO														Red Dragon- W1	21.9	NO INFO
Cherry Pie by Washington State Sweet Leaf Gardens- W18	21.4	0.9														Mango - Private Reearch- W7a	21.9	NO INFO
True OG 1g Pre Roll Northwest Grown- W16a	21.4	NO INFO														Goffa- House of Cultivar- W7a	21.9	NO INFO
Phat Panda Cenex- W9b	21.4	0.4														River City Orange Fire- From the Soil- W7a	21.9	NO INFO
Bay Dream - Fifty Fold - W20a	21.4	NO INFO														Gabriel- Sherbert- W9a	21.9	NO INFO
Pink Lemonade- Rochester Farms- W20a	21.4	0.6														Top Cut- Dog Treats- W9a	21.9	NO INFO
Hindu Tahoe- Pono (Pre-roll)- W20a	21.4	0.3														Super Lemon Kush by Washington State Sweet Leaf Gardens- W18	21.9	0.1
Fruit Loops (Pre-roll)- W23	21.4	NO INFO														Pepe's Papaya Dream City- W16a	21.9	NO INFO
Loud Berry (Pre-roll)- W23	21.4	No INFO														Dosidos 1937 Farms- W16a	21.9	NO INFO
Northern Lights- W24	21.4	NO INFO														Blue Dream Pre Roll 1g Artizen- W16a	21.9	0.4
Lemon OG- W24	21.4	No INFO														Vodis Critical Jack- w9b	21.9	NO INFO
Dutch Queen- W24	21.4	NO INFO														DJ Short Blueberry- W24	21.9	NO INFO
Orange Kush Trim- W25	21.4	NO INFO														Hammer head- W24	21.9	NO INFO
ELLA- Docs OG- W28	21.4	0														Black TahoeOG- W24	21.9	NO INFO
ELLA- Docs OG Preroll- W28	21.4	0.06														RW_ Hammerhead- W28	21.9	0.21
Ultraviolet- W32	21.4	0														RW- Black Tahoe OG- W28	21.9	0
Cherry Pie- W35	21.4	0.9														RW- Hammerhead- W28	21.9	0.21
Sunset Sherbet- W36	21.4	NO INFO														Freddy's Kush- W33	21.9	0
OZ Kush- w36	21.4	No INFO														Marmalade- W33	21.9	0
Royal Purple Bong Buddies- W36	21.4	NO INFO														Super Lemon Kush- W35	21.9	0.1
Hurricane- W37	21.4	0.15														Purple Pineapple Express Preroll-W35	21.9	0
Sour Cyclone (CBD)- W37	21.4	0.57														Hawaiian Golden Pineapple- W36	21.9	NO INFO
Blue Dream Preroll- W32	21.42	0														Blueberry Diesel- W36	21.9	NO INFO
Rio Negro- W25	21.44	NO INFO														Hawaiian Golden Pineapple- W36	21.9	NO INFO
ELLA- Lemon Alien Dawg- W28	21.45	0.05														Uptown Piff- W2	21.91	0
ELLA- Alien Dawg- W28	21.45	0.05														Dutch Berry- W24	21.925	NO INFO
Critical Kush- W32	21.45	0														Hells Fire- W39	21.93	0.76
Ak- 47- W33	21.47	0.04														G-13- W24	21.94	NO INFO
Hybrid Mix Preroll- W33	21.48	0.08														Blackberry Kush- W39	21.94	0.08
Narnia- Soulshine- W7a	21.5	0.7														Pink Lemon Aid- W37	21.95	0.68
Cookies- Gabriel- W7a	21.5	0.3														Training Day- W6	21.98	NO INFO
Sherbert- Gabriel- W7a	21.5	NO INFO														WiFI 43- W4a	22	NO INFO
Pink Cookies- Private Reserve- W7a	21.5	NO INFO														Sour Strawberry Kush- W4a	22	NO INFO
Skywalker OG- Willie's Reserve- W7a	21.5	No INFO														Spicy Pineapple- W4a	22	NO INFO
Eco Budz- LAGG- W9a	21.5	NO INFO														Dutch-Grapefruit- W4a	22	NO INFO
Berry White- W12	21.5	0														DJ Short Flo- W4a	22	NO INFO
Amnesia Haze Virginia Company- W16a	21.5	NO INFO														9 Pound Hammer #6- W4a	22	NO INFO
Kali Cannaman Farms- W16a	21.5	NO INFO														Suer Mac- W4a	22	NO INFO
Kali Mist Cannaman Farms- W16a	21.5	NO INFO														Grape Cheese- W4a	22	NO INFO
Lamb's Bread Sour Diesel Hemp Kings- W16a	21.5	0.2														Starberry- W4a	22	NO INFO
Purple Punch High Five Farms- W16a	21.5	No INFO														Glue- W4a	22	NO INFO
Shiatsu Kush Root Down- W16a	21.5	NO INFO														Amnesia- W4a	22	NO INFO
Sky Standard Dutch Treat- W9b	21.5	0.2														Rick Jones- W4a	22	NO INFO
Golden Pineapple- Phat Panda- W20a	21.5	0.4														White Lotus- W4a	22	NO INFO
OG Chem- Virginia Company- W20a	21.5	NO INFO														Stardawg- W4a	22	NO INFO
Candy Kush- W21a	21.5	0.6														Blue Sherbert- Legends- W7a	22	0.3
Golden Ticket From GTP- W22a	21.5	NO INFO														Cookies 'N Cream- Gabriel- W7a	22	NO INFO
Memory Loss- W24	21.5	NO INFO														Golden Pineapple- Phat Panda- W7a	22	0.9
Fire OG- W25	21.5	3.5														Secret Recipe- Willie's Reserve- W7a	22	No INFO
Gorilla Glue #4- W32	21.5	0.1														Double Dream by North Coast Growers- W8	22	NO INFO
Durban Poson Preroll- W33	21.5	0														Gabriel- Lemon Sorbet #2- W9a	22	NO INFO
Flower Sloop's OG/ Alien Blood Joint (Preroll)- W34	21.5	No INFO														Secret Recipe- W12	22	0
Alien OG- W36	21.5	NO INFO														Blue Enzo NWP- W16a	22	NO INFO
Sour Diesel- W1	21.51	NO INFO														Glue Buddha- W16a	22	NO INFO
Dutch Treat- W23	21.52	NO INFO														Velvet Pie Jackpot Seaweed- W16a	22	NO INFO
Black Cherry Soda- W25	21.53	0.92														Dutch Berry Pre Roll Artizen- W16a	22	NO INFO
Chocolope- W32	21.54	0.24														Mega Jackpot- Western Cultured- W20a	22	NO INFO
Snoop's Dream Preroll- W33	21.56	0.06														Mega Jackpot- Western Cultured (Pre-roll)- W20a	22	NO INFO
Sour Tangie- W37	21.56	0.32														Seattle Sour Breath- Phat Panda (Pre-roll)- W20a	22	0.5
La Con Budlets- Dama- W7a	21.6	0.3														DJ Short's Flo- W21a	22	NO INFO
Blueberry Cheesecake- Solstice Tradition- W7a	21.6	NO INFO														Ework- W21a	22	NO INFO
Cherry Pie- Dutchy- W7a	21.6	NO INFO														Dutch Treat From Natural- W22a	22	NO INFO
Lemon Meringue- Solstice Tradition- W7a	21.6	NO INFO														Golden Ticket from Freya- W22a	22	NO INFO
SPP- Bue Cinex- W9a	21.6	0.7														Hillbilly- W22a	22	NO INFO
24k Gold Sonic Green- W16a	21.6	0.2														Strawberry Cough From Cowlitz Gold- W22a	22	No INFO
Lamb's Bread Sour Diesel Shake Hemp Kings- W16a	21.6	NO INFO														Strawberry Dutch- W22a	22	NO INFO
Super Lemon Haze Pre Roll 0.5g Liberty Reach- W16a	21.6	NO INFO														Blackberry Stomper- W22a	22	No INFO
Knights Hemplar Power Kush (Indica Preroll)- W9b	21.6	0.2														Blueberry Diesel from Freya- W22a	22	NO INFO
God's Gift (Pre-roll)- W23	21.6	NO INFO														Critical Plus From Buddy Boy- W22a	22	NO INFO
Lost Coast- W33	21.6	0.3														Plusberry From LCG- W22a	22	NO INFO
Shake Death Star- W34	21.6	NO INFO														SAGE- W22a	22	NO INFO
Flower Cookies N Cream- W34	21.6	NO INFO														Pre Rolls .5G-1G from GTP- W22a	22	NO INFO
OG Kush- W36	21.6	NO INFO														Pre Rolls From Mount Baker Gardens- W22a	22	NO INFO
Do Si Dos- W36	21.6	NO INFO														Chocolate Chunk- W23	22	NO INFO
Petroleum Jelly- W37	21.6	0.11														Death Star- W23	22	NO INFO
Lucky's Private Reserve- W37	21.61	0.18														Spaceberries- W23	22	NO INFO
GG #4- W37	21.63	0.18														Death Star (Pre-roll)- W23	22	NO INFO
Blue Dream Joint- W39	21.63	0														Cynex- W4b	22	NO INFO
American Beauty- W39	21.65	0.01														Lavender- W4b	22	NO INFO
Cuvee Joint- W39	21.65	1														Bubbleberry- W4b	22	No INFO
Tangerine Dream- W1	21.66	NO INFO														Sunset Sherbet- W4b	22	NO INFO
Panda Snax Preroll- W32	21.67	0.36														White Fire OG- W4b	22	NO INFO
Purple Pleidas- W37	21.69	0.89														Coked Out Girl Scout- W4b	22	NO INFO
Strawberry Mamba- W37	21.69	0.89														9lb Hammer- W4b	22	NO INFO
Snoop's Dream- Dutchy- W7a	21.7	NO INFO														Sapphire- W4b	22	NO INFO
White Nightmare- Forbidden Farms- W7a	21.7	NO INFO														DJ Shorts Flo- W4b	22	NO INFO
Grand Daddy Purple- Phat Panda- W7a	21.7	0.4														Candy Kush preroll- W4b	22	NO INFO
Primus- W12	21.7	0														Primo Popcorn- Dirty Girl- W30	22	NO INFO
Phantom Cookies- W12	21.7	0														Blackberry Kush- Green Acres Farm- W30	22	NO INFO
Double Tangie Banana by Washington State Sweet Leaf Gardens- W18	21.7	0														Granddaddy Purple- W30	22	NO INFO
Elmer's Glue Liberty Reach- W16a	21.7	NO INFO														Grape Ape- W30	22	NO INFO
La Cofidential Pre-Rol 1g Artizen- W16a	21.7	NO INFO														Lemon Diesel- W30	22	0.23
Grape Cheese- Pono- W20a	21.7	0.3														Clandestine- W30	22	NO INFO
Pink Cookies- NWCS- W20a	21.7	NO INFO														Primo Popcorn- Dirty Girl- W30	22	NO INFO
Grape Cheese- Pono (Pre-roll)- W20a	21.7	0.3														Blackberry Kush- Green Acres Farm- W30	22	NO INFO
Moonshine Haze- W23	21.7	NO INFO														Granddaddy Purple- W30	22	NO INFO
Royal Kush (Pre-roll)- W23	21.7	NO INFO														Grape Ape- W30	22	NO INFO
Black Russian- W25	21.7	NO INFO														Lemon Diesel- W30	22	0.23
Sweet Cheese- W25	21.7	NO INFO														Clandestine- W30	22	NO INFO
Cooks N Cream- W32	21.7	NO INFO														Black Betty- W32	22	0.18
Flower Jack Dawg- W34	21.7	NO INFO														Galactic Glue- W32	22	NO INFO
Double Tangie- W35	21.7	0														Gilz Nilz by Tranquil- W32	22	NO INFO
GG- W37	21.7	0.16														Haterade Pre-roll	22	NO INFO
Rocket Cones (pre-roll)- W37	21.7	0.2														Dutchberry- W33	22	0
Orange Cookies-W2	21.73	0														Mr. Tusk- W36	22	NO INFO
DS- Blueberry Cheesecake- W28	21.74	0.05														Blackbeard's Gold- W36	22	NO INFO
ART- Dutchberry- W28	21.76	0.28														Chem Brulee- W36	22	No INFO
Blue Cheese- W39	21.77	0														Apricot Helix Orange Tahoe Popcorn- W36	22	NO INFO
LA Confidntial- W37	21.78	0														Orange Zkittlez Bong Buddies- W36	22	NO INFO
Lamb's Bread- W25	21.79	NO INFO														DJ's Short Bluebery- W37	22	0
Swamp Boys Nookies- W1	21.8	NO INFO														Jack Herer- W2	22.02	0
Golden Tangie- Liberty Reach- W7a	21.8	NO INFO														Magnum Pi by TreeHawk Farms- W8	22.02	0.09
Artizen- Quantam Leap- W9a	21.8	0.5														Maui Waui PreRoll- W25	22.04	NO INFO
Treedom- Jackie G- W9a	21.8	NO INFO														Blackberry Fire Alien #1- W25	22.06	NO INFO
Ellensburg Blue by Binx Buds- W18	21.8	0														Cement Shoes Preroll- W32	22.08	0.16
Romulan Soulshine - W16a	21.8	NO INFO														Cheap Thrilz- Green Ribbon- W33	22.08	0
Critical Plus Pre Roll 1g Root Down- W16a	21.8	0.3														Glookies-W2	22.1	0.09
Grape Ape Pre Roll 1g Artizen- W16a	21.8	NO INFO														Skunk #1- 1937 Farms- W7a	22.1	No INFO
#REF!	21.8	0.2														Sour Cookies- Firebros- W7a	22.1	NO INFO
Tahoe OG- Rootworx- W20a	21.8	0.2														Phat Panda- Golden Pineapple- W9a	22.1	1.5
Dirty White Girl- Hi Guys (Pre-roll)- W20a	21.8	NO INFO														Knights Hemplar- Afgooey- W9a	22.1	NO INFO
Rawdawg- W24	21.8	NO INFO														NWCS- Leg- Hash Plant- W9a	22.1	NO INFO
Lemon Amnesia- W32	21.8	0														Dr. Who- W12	22.1	0
Ellensburg Blue- W35	21.8	NO INFO														Norcal Blue Root Down- W16a	22.1	0.2
White Rabbit- W36	21.81	0.09														Blue Dream Pre Roll 0.5g Stryps- W16a	22.1	0.3
Gorilla Glue Preroll- W32	21.84	0.9														Blue Dream- NWCS Legends- W20a	22.1	NO INFO
GSC Joint- W39	21.9	NO INFO														Blueberry joint- Virginia Company- W20a	22.1	NO INFO
Red Dragon- W1	21.9	NO INFO														Banana Split- W25	22.1	NO INFO
Mango - Private Reearch- W7a	21.9	NO INFO														Citrus Kush Preroll- W33	22.1	0
Goffa- House of Cultivar- W7a	21.9	NO INFO														Flower Death Star B-Buds- W34	22.1	NO INFO
River City Orange Fire- From the Soil- W7a	21.9	NO INFO														Moonshine OG- W36	22.1	NO INFO
Gabriel- Sherbert- W9a	21.9	NO INFO														Gobbilygoo- W36	22.1	NO INFO
Top Cut- Dog Treats- W9a	21.9	0.1														Gand Daddy Purple Bong Buddies- W36	22.1	NO INFO
Super Lemon Kush by Washington State Sweet Leaf Gardens- W18	21.9	NO INFO														Forbidden Fruit- W36	22.1	NO INFO
Pepe's Papaya Dream City- W16a	21.9	NO INFO														Chernobyl- W37	22.1	0
Dosidos 1937 Farms- W16a	21.9	0.4														Girl Scout Cookies- W6	22.11	NO INFO
Blue Dream Pre Roll 1g Artizen- W16a	21.9	NO INFO														Memory Loss- W6	22.12	NO INFO
Vodis Critical Jack- w9b	21.9	NO INFO														Tangie- W32	22.12	0
DJ Short Blueberry- W24	21.9	NO INFO														Cinex- W39	22.13	0.09
Hammer head- W24	21.9	NO INFO														Clementine Joints- W39	22.14	0
Black TahoeOG- W24	21.9	0.21														Star Dawg- W24	22.195	NO INFO
RW_ Hammerhead- W28	21.9	0														OG Kush- Golden Tree- W7a	22.2	NO INFO
RW- Black Tahoe OG- W28	21.9	0.21														Schrom- From the Soil- W7a	22.2	NO INFO
RW- Hammerhead- W28	21.9	0														Strawberry Banana- Phat Panda- W7a	22.2	NO INFO
Freddy's Kush- W33	21.9	0														Sunset Sherbert- Willie's Reserve- W7a	22.2	NO INFO
Marmalade- W33	21.9	0.1														Artizen- Grape Ape- W9a	22.2	NO INFO
Super Lemon Kush- W35	21.9	0														Blue Dream FC SG- W16a	22.2	NO INFO
Purple Pineapple Express Preroll-W35	21.9	NO INFO														Neville's Haze Elements- W16a	22.2	NO INFO
Hawaiian Golden Pineapple- W36	21.9	NO INFO														XJ-13 Koala Canyon- W16a	22.2	No INFO
Blueberry Diesel- W36	21.9	NO INFO														Blueberry Trainwreck (Pre-roll)- W23	22.2	NO INFO
Hawaiian Golden Pineapple- W36	21.91	0														Albino Kush- W25	22.2	NO INFO
Uptown Piff- W2	21.925	NO INFO														ELLA- Bubba Kush- W28	22.2	0.2
Dutch Berry- W24	21.93	0.76														ELLA- Jamaican Jam- W28	22.2	0.2
Hells Fire- W39	21.94	NO INFO														ELLA- Jamaican Jame Preroll- W28	22.2	0.2
G-13- W24	21.94	0.08														Super Lemon Haze- W32	22.2	0.05
Blackberry Kush- W39	21.95	0.68														Joints Green Crack (Preroll)-W34	22.2	No INFO
Pink Lemon Aid- W37	21.98	NO INFO														Cenex Bong Buddies- W36	22.2	NO INFO
Training Day- W6	22	NO INFO														Fruit Loops- W36	22.2	NO INFO
WiFI 43- W4a	22	NO INFO														Golden Lemons- W36	22.2	NO INFO
Sour Strawberry Kush- W4a	22	NO INFO														Expoxy- W32	22.22	0
Spicy Pineapple- W4a	22	NO INFO														Galactic Glue- W37	22.22	0.06
Dutch-Grapefruit- W4a	22	NO INFO														Chem Dog- W32	22.25	0.03
DJ Short Flo- W4a	22	NO INFO														L.A. Confidential- W33	22.26	0
9 Pound Hammer #6- W4a	22	NO INFO														Double Dream- W25	22.29	3.39
Suer Mac- W4a	22	NO INFO														Sour Diesel- Nebula- W7a	22.3	NO INFO
Grape Cheese- W4a	22	NO INFO														Pure Kush- Washington Bud Company- W7a	22.3	0.2
Starberry- W4a	22	NO INFO														Elmer's Glue- Jackpot Seaweed- W7a	22.3	NO INFO
Glue- W4a	22	NO INFO														Artizen- Sour Diesel- W9a	22.3	NO INFO
Amnesia- W4a	22	NO INFO														Dama- L.A. con- W9a	22.3	0.3
Rick Jones- W4a	22	NO INFO														NWCS- PRIV- Sunset Sherbert- W9a	22.3	NO INFO
White Lotus- W4a	22	NO INFO														Casey Quantum Buddha- W16a	22.3	NO INFO
Stardawg- W4a	22	0.3														Cookies N Cream Lifted- W16a	22.3	0.2
Blue Sherbert- Legends- W7a	22	NO INFO														Ogre Og NWCS Mini Budz- W16a	22.3	NO INFO
Cookies 'N Cream- Gabriel- W7a	22	0.9														Swamp Thing Forte- W16a	22.3	NO INFO
Golden Pineapple- Phat Panda- W7a	22	No INFO														Sour Diesel Pre Roll Artizen- W16a	22.3	NO INFO
Secret Recipe- Willie's Reserve- W7a	22	NO INFO														Dream Beaver- Phat Panda- W20a	22.3	0.2
Double Dream by North Coast Growers- W8	22	NO INFO														White Russian- W23	22.3	No INFO
Gabriel- Lemon Sorbet #2- W9a	22	0														Eleveate (Pre-roll)- W23	22.3	NO INFO
Secret Recipe- W12	22	NO INFO														Ghost Breath	22.3	No INFO
Blue Enzo NWP- W16a	22	NO INFO														Grape Cheese Popcorn Buds- W25	22.3	NO INFO
Glue Buddha- W16a	22	NO INFO														Black Afghan- W32	22.3	NO INFO
Velvet Pie Jackpot Seaweed- W16a	22	NO INFO														Pineapple KushPreroll- W33	22.3	2.7
Dutch Berry Pre Roll Artizen- W16a	22	NO INFO														Blackberry Og- W35	22.3	0.5
Mega Jackpot- Western Cultured- W20a	22	NO INFO														Royal Kush Bong Buddies- W36	22.3	No INFO
Mega Jackpot- Western Cultured (Pre-roll)- W20a	22	0.5														Snoop's Dream by Treehawk Farms- W8	22.36	0
Seattle Sour Breath- Phat Panda (Pre-roll)- W20a	22	NO INFO														FK- NY Diesel Preroll- W28	22.38	0.1
DJ Short's Flo- W21a	22	NO INFO														Star Dawg- W33	22.38	0.01
Ework- W21a	22	NO INFO														DOH Blackberry Kush Trim- Washington Bud Company- W7a	22.4	NO INFO
Dutch Treat From Natural- W22a	22	NO INFO														Raspberry Lemonade- Freddy's Fuego- W7a	22.4	NO INFO
Golden Ticket from Freya- W22a	22	NO INFO														Grandaddy Purple- Solstice tradition- W7a	22.4	NO INFO
Hillbilly- W22a	22	No INFO														Top Cut- Pitbull- W9a	22.4	NO INFO
Strawberry Cough From Cowlitz Gold- W22a	22	NO INFO														Liberty Reach- Memory Loss- W9a	22.4	NO INFO
Strawberry Dutch- W22a	22	No INFO														Pineapple Express Koala Canyon- W16a	22.4	0.7
Blackberry Stomper- W22a	22	NO INFO														ART- Allen Wrench- W28	22.4	0.05
Blueberry Diesel from Freya- W22a	22	NO INFO														ELLA- Cranberry Kush Preroll- W28	22.4	0.19
Critical Plus From Buddy Boy- W22a	22	NO INFO														Flower Snow Leopard B-Buds- W34	22.4	NO INFO
Plusberry From LCG- W22a	22	NO INFO														Flower Snow Leopard- W34	22.4	No INFO
SAGE- W22a	22	NO INFO														Joint OG's Pearl (Preroll)- W34	22.4	NO INFO
Pre Rolls .5G-1G from GTP- W22a	22	NO INFO														Bay Dream Preroll- W35	22.4	2.5
Pre Rolls From Mount Baker Gardens- W22a	22	NO INFO														Raspberry Kush Preroll- W35	22.4	0.9
Chocolate Chunk- W23	22	NO INFO														Rude Boy Bong Buddies- W36	22.4	NO INFO
Death Star- W23	22	NO INFO														Diesel Fire- W36	22.4	NO INFO
Spaceberries- W23	22	NO INFO														Black Jack- W36	22.4	NO INFO
Death Star (Pre-roll)- W23	22	NO INFO														Chem Stardashian- W6	22.41	NO INFO
Cynex- W4b	22	NO INFO														Querkle- W37	22.43	0.12
Lavender- W4b	22	No INFO														Allen Wrench Preroll- W33	22.45	0.31
Bubbleberry- W4b	22	NO INFO														Dr. Who Pre-Roll- W32	22.47	0
Sunset Sherbet- W4b	22	NO INFO														Pineapple by Walden - W18	22.5	0
White Fire OG- W4b	22	NO INFO														Liberty OG Liberty Reach- W16a	22.5	NO INFO
Coked Out Girl Scout- W4b	22	NO INFO														Diamond OG- W25	22.5	NO INFO
9lb Hammer- W4b	22	NO INFO														Coked Out Girl Scout- W25	22.5	NO INFO
Sapphire- W4b	22	NO INFO														Skywalker OG- W32	22.5	NO INFO
DJ Shorts Flo- W4b	22	NO INFO														Pineapple- W35	22.5	0
Candy Kush preroll- W4b	22	NO INFO														Lemon Meringue Preroll- W35	22.5	0.9
Primo Popcorn- Dirty Girl- W30	22	NO INFO														Hindu Kush- W36	22.5	NO INFO
Blackberry Kush- Green Acres Farm- W30	22	NO INFO														Grape Cavicone (infused prerol)- W36	22.5	0.8
Granddaddy Purple- W30	22	NO INFO														Gypsy Daydream- W37	22.5	0.11
Grape Ape- W30	22	0.23														Gypsy Daydream (pre-roll)- W37	22.5	0.11
Lemon Diesel- W30	22	NO INFO														Hawaiian Golden Pineapple- W1	22.51	NO INFO
Clandestine- W30	22	NO INFO														Blackbeard's Gold- W32	22.52	NO INFO
Primo Popcorn- Dirty Girl- W30	22	NO INFO														Fk- Knockout Preroll- W28	22.59	0.1
Blackberry Kush- Green Acres Farm- W30	22	NO INFO														Galactic Glue- W33	22.59	0
Granddaddy Purple- W30	22	NO INFO														Blue Dream- W1	22.6	NO INFO
Grape Ape- W30	22	0.23														Dutch Treat- WEED- W7a	22.6	NO INFO
Lemon Diesel- W30	22	NO INFO														OG Kush- Dama- W7a	22.6	0.9
Clandestine- W30	22	0.18														Knights Hemplar- Blueberry Blast- W9a	22.6	NO INFO
Black Betty- W32	22	NO INFO														Blackberry Cream by Pilot Farms- W18	22.6	0.2
Galactic Glue- W32	22	NO INFO														Northern Lights by Boggy Boon- W18	22.6	0
Gilz Nilz by Tranquil- W32	22	NO INFO														Blckberry Kush Shake Hemp Kings- W16a	22.6	NO INFO
Haterade Pre-roll	22	0														Super G Soulshine- W16a	22.6	NO INFO
Dutchberry- W33	22	NO INFO														Phat Panda White Tahoe Cookies Bong Buddes- W9b	22.6	0.2
Mr. Tusk- W36	22	NO INFO														Candy Apple Dream- Medusa- W20a	22.6	0.8
Blackbeard's Gold- W36	22	No INFO														Thin mint Cookie- W24	22.6	No INFO
Chem Brulee- W36	22	NO INFO														Dirty White Girls- W25	22.6	NO INFO
Apricot Helix Orange Tahoe Popcorn- W36	22	NO INFO														Cotton Candy- W32	22.6	0.1
Orange Zkittlez Bong Buddies- W36	22	0														Blackberry Kush- W33	22.6	0.2
DJ's Short Bluebery- W37	22.02	0														GG4- W33	22.6	0
Jack Herer- W2	22.02	0.09														Blackberry Kush Preroll- W33	22.6	0.29
Magnum Pi by TreeHawk Farms- W8	22.04	NO INFO														Joint Purple Urkle (Preroll)- W34	22.6	0.6
Maui Waui PreRoll- W25	22.06	NO INFO														Blackberry Cream- W35	22.6	0.2
Blackberry Fire Alien #1- W25	22.08	0.16														Norhtern Lights- W35	22.6	0
Cement Shoes Preroll- W32	22.08	0														ART-Blue Dream- W28	22.62	0
Cheap Thrilz- Green Ribbon- W33	22.1	0.09														Liberty OG- W6	22.63	NO INFO
Glookies-W2	22.1	No INFO														Purple Prism- W24	22.65	NO INFO
Skunk #1- 1937 Farms- W7a	22.1	NO INFO														Space Helicopter- W25	22.66	NO INFO
Sour Cookies- Firebros- W7a	22.1	1.5														Green Crack- W37	22.69	0.74
Phat Panda- Golden Pineapple- W9a	22.1	NO INFO														Freddy's Kush- Freddy's Fuego- W7a	22.7	NO INFO
Knights Hemplar- Afgooey- W9a	22.1	NO INFO														Top Cut- 9# Hammer- W9a	22.7	NO INFO
NWCS- Leg- Hash Plant- W9a	22.1	0														Og X Cannalope Haze Pre Roll 1g High Five Farms- W16a	22.7	No INFO
Dr. Who- W12	22.1	0.2														Catholic School Girl- W21a	22.7	NO INFO
Norcal Blue Root Down- W16a	22.1	0.3														Alice in Wonderland- W22a	22.7	NO INFO
Blue Dream Pre Roll 0.5g Stryps- W16a	22.1	NO INFO														Cotton Candy- W25	22.7	NO INFO
Blue Dream- NWCS Legends- W20a	22.1	NO INFO														Blue Power- W33	22.7	0.1
Blueberry joint- Virginia Company- W20a	22.1	NO INFO														Headband- W36	22.7	NO INFO
Banana Split- W25	22.1	0														Girl Scout Cookies- W36	22.7	NO INFO
Citrus Kush Preroll- W33	22.1	NO INFO														Maui- W6	22.71	NO INFO
Flower Death Star B-Buds- W34	22.1	NO INFO														God's Gift- W6	22.74	NO INFO
Moonshine OG- W36	22.1	NO INFO														NYPD- W24	22.74	NO INFO
Gobbilygoo- W36	22.1	NO INFO														Expert Haze- W2	22.75	0.06
Gand Daddy Purple Bong Buddies- W36	22.1	NO INFO														Tangerine Power- W6	22.77	NO INFO
Forbidden Fruit- W36	22.1	0														Kosher Kush- W33	22.78	0.04
Chernobyl- W37	22.11	NO INFO														Golden Panda Preroll- W32	22.79	0
Girl Scout Cookies- W6	22.12	NO INFO														Lost Coast- Lopez and Orr- W7a	22.8	NO INFO
Memory Loss- W6	22.12	0														Pars OG Hemp Kings- W16a	22.8	NO INFO
Tangie- W32	22.13	0.09														Blueberry Trainwreck Pre-Roll 1g Olympia Cannabis- W16a	22.8	NO INFO
Cinex- W39	22.14	0														Lebanese Gold Pre Roll 0.75g Sitka- W16a	22.8	No INFO
Clementine Joints- W39	22.195	NO INFO														Super Silver Haze From Freya- W22a	22.8	NO INFO
Star Dawg- W24	22.2	NO INFO														Presidential Kush From Buddy Boy- W22a	22.8	NO INFO
OG Kush- Golden Tree- W7a	22.2	NO INFO														Snow Dawg (Pre-roll)- W23	22.8	NO INFO
Schrom- From the Soil- W7a	22.2	NO INFO														Farmstrong- W25	22.8	NO INFO
Strawberry Banana- Phat Panda- W7a	22.2	NO INFO														Tang Power- W25	22.8	NO INFO
Sunset Sherbert- Willie's Reserve- W7a	22.2	NO INFO														ART- Stardawg- W28	22.8	0.02
Artizen- Grape Ape- W9a	22.2	NO INFO														Cherry Pie Prerol- W35	22.8	0
Blue Dream FC SG- W16a	22.2	NO INFO														White Tara- W36	22.8	NO INFO
Neville's Haze Elements- W16a	22.2	No INFO														Silvertip- W36	22.8	NO INFO
XJ-13 Koala Canyon- W16a	22.2	NO INFO														Dutch Treat #5- W36	22.8	NO INFO
Blueberry Trainwreck (Pre-roll)- W23	22.2	NO INFO														Hell's Fire- W37	22.81	0
Albino Kush- W25	22.2	0.2														Acapulco Gold- W6	22.84	NO INFO
ELLA- Bubba Kush- W28	22.2	0.2														Bruce Banner (pre-roll)- W37	22.84	0.08
ELLA- Jamaican Jam- W28	22.2	0.2														Allen Wrench- W24	22.88	NO INFO
ELLA- Jamaican Jame Preroll- W28	22.2	0.05														M.A.C.- W1	22.9	NO INFO
Super Lemon Haze- W32	22.2	No INFO														Lambs Bread- Golden Tree- W7a	22.9	NO INFO
Joints Green Crack (Preroll)-W34	22.2	NO INFO														Trainwreck- REUP- W7a	22.9	0.2
Cenex Bong Buddies- W36	22.2	NO INFO														Abusive OG- Platinum Gardens- W7a	22.9	NO INFO
Fruit Loops- W36	22.2	NO INFO														Blueberry Cheesecake- Nebula- W7a	22.9	0.3
Golden Lemons- W36	22.22	0														Cookies- Private Reserve- W7a	22.9	NO INFO
Expoxy- W32	22.22	0.06														Fireline Cannabis- Blue Power- W9a	22.9	NO INFO
Galactic Glue- W37	22.25	0.03														Strawberry Purp by Walden - W18	22.9	0
Chem Dog- W32	22.26	0														Allen Wrench Pre Roll Artizen- W16a	22.9	NO INFO
L.A. Confidential- W33	22.29	3.39														SPP Holy Grail- W9b	22.9	NO INFO
Double Dream- W25	22.3	NO INFO														Lambsbread- W24	22.9	NO INFO
Sour Diesel- Nebula- W7a	22.3	0.2														Grand Daddy Purple- W24	22.9	NO INFO
Pure Kush- Washington Bud Company- W7a	22.3	NO INFO														Strawberry Purp- W35	22.9	0
Elmer's Glue- Jackpot Seaweed- W7a	22.3	NO INFO														Pineapple Super Silver Haze Preroll- W35	22.9	0
Artizen- Sour Diesel- W9a	22.3	0.3														Lemon Banana Sherbet Popcorn- W36	22.9	NO INFO
Dama- L.A. con- W9a	22.3	NO INFO														Headband- W36	22.9	0.2
NWCS- PRIV- Sunset Sherbert- W9a	22.3	NO INFO														Purple Skywalker OG- W25	22.92	NO INFO
Casey Quantum Buddha- W16a	22.3	0.2														Rollex OG- W25	22.92	NO INFO
Cookies N Cream Lifted- W16a	22.3	NO INFO														FK- Purple Skywalker- W28	22.93	0
Ogre Og NWCS Mini Budz- W16a	22.3	NO INFO														Hashbar OG Preroll- W32	22.95	0
Swamp Thing Forte- W16a	22.3	NO INFO														Galactic Glue- W24	22.96	NO INFO
Sour Diesel Pre Roll Artizen- W16a	22.3	0.2														Washington Glue- W25	22.965	NO INFO
Dream Beaver- Phat Panda- W20a	22.3	No INFO														Great White Shark- W25	22.97	NO INFO
White Russian- W23	22.3	NO INFO														UK Cheese-W2	22.98	0.07
Eleveate (Pre-roll)- W23	22.3	No INFO														Walker Kush- W24	22.98	NO INFO
Ghost Breath	22.3	NO INFO														Acapulco Gold- W4a	23	NO INFO
Grape Cheese Popcorn Buds- W25	22.3	NO INFO														Tangie- W4a	23	NO INFO
Black Afghan- W32	22.3	2.7														Primus- W4a	23	NO INFO
Pineapple KushPreroll- W33	22.3	0.5														Ghost OG- W4a	23	NO INFO
Blackberry Og- W35	22.3	No INFO														Orange Creamsicle- W4a	23	NO INFO
Royal Kush Bong Buddies- W36	22.36	0														Omega Dawg- W4a	23	No INFO
Snoop's Dream by Treehawk Farms- W8	22.38	0.1														Golden Pinapple- W4a	23	NO INFO
FK- NY Diesel Preroll- W28	22.38	0.01														Ace of Spades- W6	23	NO INFO
Star Dawg- W33	22.4	NO INFO														Snoop's Dream- W6	23	NO INFO
DOH Blackberry Kush Trim- Washington Bud Company- W7a	22.4	NO INFO														Cinderella's Dream- W6	23	NO INFO
Raspberry Lemonade- Freddy's Fuego- W7a	22.4	NO INFO														Hash Plant- Legends- W7a	23	NO INFO
Grandaddy Purple- Solstice tradition- W7a	22.4	NO INFO														Sunset Sherbert- Private Reserve- W7a	23	NO INFO
Top Cut- Pitbull- W9a	22.4	NO INFO														Star Dawg- Artizen- W7a	23	NO INFO
Liberty Reach- Memory Loss- W9a	22.4	0.7														Jacks Dream Koala Canyon- W16a	23	NO INFO
Pineapple Express Koala Canyon- W16a	22.4	0.05														JPSW Ghost Breath- W9b	23	No INFO
ART- Allen Wrench- W28	22.4	0.19														Amnesia From Clandestine- W22a	23	No INFO
ELLA- Cranberry Kush Preroll- W28	22.4	NO INFO														Amnesia Haze From Ceres- W22a	23	NO INFO
Flower Snow Leopard B-Buds- W34	22.4	No INFO														Grapefrui from Cascadia Gardens- W22a	23	No INFO
Flower Snow Leopard- W34	22.4	NO INFO														Oregon Silver Haze by Freya- W22a	23	No INFO
Joint OG's Pearl (Preroll)- W34	22.4	2.5														Secret Recipe From Natural Mystic- W22a	23	NO INFO
Bay Dream Preroll- W35	22.4	0.9														The Jack- W22a	23	NO INFO
Raspberry Kush Preroll- W35	22.4	NO INFO														Blackberry Kush- W22a	23	NO INFO
Rude Boy Bong Buddies- W36	22.4	NO INFO														Cherry Pie From Topp Nuggs- W22a	23	NO INFO
Diesel Fire- W36	22.4	NO INFO														DJ Short Blueberry From GTP- W22a	23	NO INFO
Black Jack- W36	22.41	NO INFO														Dr. Who- W22a	23	NO INFO
Chem Stardashian- W6	22.43	0.12														Romulan From Buddy Boy- W22a	23	NO INFO
Querkle- W37	22.45	0.31														Strawberry Bannana From Freya- W22a	23	NO INFO
Allen Wrench Preroll- W33	22.47	0														Pre Rolls From Buddy Boy- W22a	23	NO INFO
Dr. Who Pre-Roll- W32	22.5	0														Pre Rolls From Ceres- W22a	23	NO INFO
Pineapple by Walden - W18	22.5	NO INFO														Super Silver Haze- W23	23	No INFO
Liberty OG Liberty Reach- W16a	22.5	NO INFO														Shiatsu Kush- W23	23	No INFO
Diamond OG- W25	22.5	NO INFO														Pink Taco (Pre-roll)- W23	23	NO INFO
Coked Out Girl Scout- W25	22.5	NO INFO														Super Silver Haze (Pre-roll)- W23	23	No INFO
Skywalker OG- W32	22.5	0														Diamond- W4b	23	NO INFO
Pineapple- W35	22.5	0.9														Blackberry Kush- W4b	23	NO INFO
Lemon Meringue Preroll- W35	22.5	NO INFO														Blueberry DJ Short- W4b	23	NO INFO
Hindu Kush- W36	22.5	0.8														Orange Kush- W4b	23	NO INFO
Grape Cavicone (infused prerol)- W36	22.5	0.11														Primus- W4b	23	NO INFO
Gypsy Daydream- W37	22.5	0.11														Dutchberry- W4b	23	8
Gypsy Daydream (pre-roll)- W37	22.51	NO INFO														Lemon OG- W4b	23	NO INFO
Hawaiian Golden Pineapple- W1	22.52	NO INFO														Tangerine Dream- W4b	23	NO INFO
Blackbeard's Gold- W32	22.59	0.1														Grease Monkey- W4b	23	NO INFO
Fk- Knockout Preroll- W28	22.59	0														Snow Monster- W4b	23	NO INFO
Galactic Glue- W33	22.6	NO INFO														OG Kush- W4b	23	NO INFO
Blue Dream- W1	22.6	NO INFO														GG4- W4b	23	NO INFO
Dutch Treat- WEED- W7a	22.6	0.9														Golden Pineapple preroll- W4b	23	NO INFO
OG Kush- Dama- W7a	22.6	NO INFO														12th Man Preroll- W4b	23	No INFO
Knights Hemplar- Blueberry Blast- W9a	22.6	0.2														Cynex preroll- W4b	23	No INFO
Blackberry Cream by Pilot Farms- W18	22.6	0														GG pre roll- W4b	23	NO INFO
Northern Lights by Boggy Boon- W18	22.6	NO INFO														Death Star- W24	23	No INFO
Blckberry Kush Shake Hemp Kings- W16a	22.6	NO INFO														Major Tom- W25	23	NO INFO
Super G Soulshine- W16a	22.6	0.2														Salmonberry- W25	23	NO INFO
Phat Panda White Tahoe Cookies Bong Buddes- W9b	22.6	0.8														Royal Plum PreRoll- W25	23	No INFO
Candy Apple Dream- Medusa- W20a	22.6	No INFO														FG- Lemon OG- W28	23	0
Thin mint Cookie- W24	22.6	NO INFO														Acapulco Gold- W30	23	NO INFO
Dirty White Girls- W25	22.6	0.1														Green Crack- Clandestine- W30	23	NO INFO
Cotton Candy- W32	22.6	0.2														Primo Popcorn- Secret Recipe- W30	23	NO INFO
Blackberry Kush- W33	22.6	0														Chemdawg Sour- W30	23	NO INFO
GG4- W33	22.6	0.29														Cookies and Cream- W30	23	NO INFO
Blackberry Kush Preroll- W33	22.6	0.6														Orange Cookies- Sub X- W30	23	NO INFO
Joint Purple Urkle (Preroll)- W34	22.6	0.2														Platinum GSC- W30	23	NO INFO
Blackberry Cream- W35	22.6	0														Acapulco Gold- W30	23	NO INFO
Norhtern Lights- W35	22.62	0														Green Crack- Clandestine- W30	23	NO INFO
ART-Blue Dream- W28	22.63	NO INFO														Primo Popcorn- Secret Recipe- W30	23	NO INFO
Liberty OG- W6	22.65	NO INFO														Chemdawg Sour- W30	23	NO INFO
Purple Prism- W24	22.66	NO INFO														Cookies and Cream- W30	23	NO INFO
Space Helicopter- W25	22.69	0.74														Orange Cookies- Sub X- W30	23	NO INFO
Green Crack- W37	22.7	NO INFO														Platinum GSC- W30	23	NO INFO
Freddy's Kush- Freddy's Fuego- W7a	22.7	NO INFO														Cindy 99- W32	23	0.23
Top Cut- 9# Hammer- W9a	22.7	No INFO														Joint Lemon OG (Preroll)- W34	23	0.7
Og X Cannalope Haze Pre Roll 1g High Five Farms- W16a	22.7	NO INFO														Colorado Clementine #5- W36	23	NO INFO
Catholic School Girl- W21a	22.7	NO INFO														Cookies Kush- W36	23	No INFO
Alice in Wonderland- W22a	22.7	NO INFO														Cuvee- W36	23	NO INFO
Cotton Candy- W25	22.7	0.1														Wi-Fi- W36	23	NO INFO
Blue Power- W33	22.7	NO INFO														Bruce Banner Sun Grown- W36	23	NO INFO
Headband- W36	22.7	NO INFO														Hazelnut Cream- W36	23	NO INFO
Girl Scout Cookies- W36	22.71	NO INFO														Canna Aloha- W37	23	0.19
Maui- W6	22.74	NO INFO														Pineapple Express- W24	23.005	No INFO
God's Gift- W6	22.74	NO INFO														Y Griega by Pure Funk- W8	23.01	1.99
NYPD- W24	22.75	0.06														Cookies n Cream- W32	23.02	0.12
Expert Haze- W2	22.77	NO INFO														Sour Headband- W12	23.03	0
Tangerine Power- W6	22.78	0.04														SQ- Blue Dream- W28	23.03	0.05
Kosher Kush- W33	22.79	0														Tangerine Haze- W37	23.04	1.13
Golden Panda Preroll- W32	22.8	NO INFO														Green Crack (Pre-roll)- W23	23.07	NO INFO
Lost Coast- Lopez and Orr- W7a	22.8	NO INFO														Pineapple Express (Pre-roll)- W23	23.07	NO INFO
Pars OG Hemp Kings- W16a	22.8	NO INFO														Grapefruit- W32	23.07	0
Blueberry Trainwreck Pre-Roll 1g Olympia Cannabis- W16a	22.8	No INFO														Trickster OG- W24	23.08	NO INFO
Lebanese Gold Pre Roll 0.75g Sitka- W16a	22.8	NO INFO														Tahoe OG- W37	23.09	0
Super Silver Haze From Freya- W22a	22.8	NO INFO														Snoop's Dream- Treehawk Farms- W7a	23.1	NO INFO
Presidential Kush From Buddy Boy- W22a	22.8	NO INFO														Eco Budz- Blue Bastard- W9a	23.1	0.5
Snow Dawg (Pre-roll)- W23	22.8	NO INFO														Harmony Farms- Jack OG- W9a	23.1	0.6
Farmstrong- W25	22.8	NO INFO														Green Crack by Cascade Growers- W18	23.1	NO INFO
Tang Power- W25	22.8	0.02														DutchTreat by Washington State Sweet Leaf Gardens- W18	23.1	0
ART- Stardawg- W28	22.8	0														Blueberry Trainwreck Olympia Cannabis- W16a	23.1	1
Cherry Pie Prerol- W35	22.8	NO INFO														Granddaddy Dutch Clandestine- W16a	23.1	NO INFO
White Tara- W36	22.8	NO INFO														Grape Ape Pre Roll 0.5g Artizen- W16a	23.1	NO INFO
Silvertip- W36	22.8	NO INFO														Skunk #1- Inflorescence- W20a	23.1	1.1
Dutch Treat #5- W36	22.81	0														GG#5 Popcorn Buds- W25	23.1	NO INFO
Hell's Fire- W37	22.84	NO INFO														Bozeman Blue- W25	23.1	NO INFO
Acapulco Gold- W6	22.84	0.08														ELLA- Lemon OG Haze- W28	23.1	0.1
Bruce Banner (pre-roll)- W37	22.88	NO INFO														ELLA- Lemon OG Haze Preroll- W28	23.1	0
Allen Wrench- W24	22.9	NO INFO														Blue Power- W32	23.1	NO INFO
M.A.C.- W1	22.9	NO INFO														Arcata Trainwreck Preroll- W33	23.1	0.19
Lambs Bread- Golden Tree- W7a	22.9	0.2														Chunk Dawg Preroll- W33	23.1	0
Trainwreck- REUP- W7a	22.9	NO INFO														Dutch Treat- W35	23.1	0
Abusive OG- Platinum Gardens- W7a	22.9	0.3														Pink Cookies- W36	23.1	NO INFO
Blueberry Cheesecake- Nebula- W7a	22.9	NO INFO														Holy Grail- W36	23.1	No INFO
Cookies- Private Reserve- W7a	22.9	NO INFO														Super Lemon Haze- W32	23.11	0
Fireline Cannabis- Blue Power- W9a	22.9	0														Power Diesel- W6	23.12	NO INFO
Strawberry Purp by Walden - W18	22.9	NO INFO														Big Bud Preroll- W33	23.14	0
Allen Wrench Pre Roll Artizen- W16a	22.9	NO INFO														DS- GG4- W28	23.16	0.04
SPP Holy Grail- W9b	22.9	NO INFO														Green Crack- W37	23.16	0.7
Lambsbread- W24	22.9	NO INFO														SQ-Skunk- W28	23.19	0
Grand Daddy Purple- W24	22.9	0														Kimbo Kush- W33	23.19	0
Strawberry Purp- W35	22.9	0														Alien Dawg- Nebula- W7a	23.2	No INFO
Pineapple Super Silver Haze Preroll- W35	22.9	NO INFO														Frosted Cherry Cookies- Liberty Reach- W7a	23.2	NO INFO
Lemon Banana Sherbet Popcorn- W36	22.9	0.2														Lemon Marmalade- Platinum Gardens- W7a	23.2	NO INFO
Headband- W36	22.92	NO INFO														Liberty Reach- Frosted Strawberries- W9a	23.2	No INFO
Purple Skywalker OG- W25	22.92	NO INFO														Berry White by Cascade Growers- W18	23.2	NO INFO
Rollex OG- W25	22.93	0														UW by Outlaw Cannabis- W18	23.2	0
FK- Purple Skywalker- W28	22.95	0														SPP Lodi Dodi (Sativa Preroll)- W9b	23.2	NO INFO
Hashbar OG Preroll- W32	22.96	NO INFO														Green Crack- Green420- W20a	23.2	0.4
Galactic Glue- W24	22.965	NO INFO														Super Lemon Haze- W23	23.2	NO INFO
Washington Glue- W25	22.97	NO INFO														Gummo Preroll- W32	23.2
Great White Shark- W25	22.98	0.07														Berry White- W35	23.2	NO INFO
UK Cheese-W2	22.98	NO INFO														UW- W35	23.2	0
Walker Kush- W24	23	NO INFO														La Con x Fire OG x Yoda OG- W36	23.2	NO INFO
Acapulco Gold- W4a	23	NO INFO														Banana OG- W36	23.2	NO INFO
Tangie- W4a	23	NO INFO														SQ- OG Kush- W28	23.21	0.04
Primus- W4a	23	NO INFO														Golden Pineapple- W1	23.24	NO INFO
Ghost OG- W4a	23	NO INFO														Middlefork Preroll- W32	23.24	0
Orange Creamsicle- W4a	23	No INFO														Pink Lemon Aid- W37	23.26	1.32
Omega Dawg- W4a	23	NO INFO														NY Diesel- W25	23.27	NO INFO
Golden Pinapple- W4a	23	NO INFO														Frosted Strawberries- Liberty Reach- W7a	23.3	NO INFO
Ace of Spades- W6	23	NO INFO														Harmony farms- Tangie- W9a	23.3	0.4
Snoop's Dream- W6	23	NO INFO														Top Shelf- Lemon OG- W9a	23.3	NO INFO
Cinderella's Dream- W6	23	NO INFO														GSC by Binx Buds- W18	23.3	0
Hash Plant- Legends- W7a	23	NO INFO														9 Pound Hammer by Cascade Growers- W18	23.3	NO INFO
Sunset Sherbert- Private Reserve- W7a	23	NO INFO														Jilly Bean Doc Croc- W16a	23.3	NO INFO
Star Dawg- Artizen- W7a	23	NO INFO														Jillybean Doc Croc- W16a	23.3	NO INFO
Jacks Dream Koala Canyon- W16a	23	No INFO														JPSW Sour Sunset Sherbet- W9b	23.3	NO INFO
JPSW Ghost Breath- W9b	23	No INFO														Phat Panda 5 P'S (Hybrid Preroll)- W9b	23.3	0.3
Amnesia From Clandestine- W22a	23	NO INFO														Bubble Bomb- W25	23.3	NO INFO
Amnesia Haze From Ceres- W22a	23	No INFO														CB- Larry OG- W28	23.3	0
Grapefrui from Cascadia Gardens- W22a	23	No INFO														9 Pound Hammer- W35	23.3	NO INFO
Oregon Silver Haze by Freya- W22a	23	NO INFO														GSC- W35	23.3	0
Secret Recipe From Natural Mystic- W22a	23	NO INFO														Pineapple Express Preroll- W35	23.3	0.5
The Jack- W22a	23	NO INFO														Alien OG Bong Buddies- W36	23.3	NO INFO
Blackberry Kush- W22a	23	NO INFO														Lemon Marmalade- W36	23.3	NO INFO
Cherry Pie From Topp Nuggs- W22a	23	NO INFO														Star Dawg- W37	23.3	0.07
DJ Short Blueberry From GTP- W22a	23	NO INFO														Golden Pineapple- W32	23.31	0.49
Dr. Who- W22a	23	NO INFO														Do Si Do- W32	23.33	0.13
Romulan From Buddy Boy- W22a	23	NO INFO														White Tara-W2	23.37	0.08
Strawberry Bannana From Freya- W22a	23	NO INFO														BC- GSC Thin Mint- W28	23.39	0
Pre Rolls From Buddy Boy- W22a	23	NO INFO														Tranquil Forest- Extreme Cream- W9a	23.4	NO INFO
Pre Rolls From Ceres- W22a	23	No INFO														Tranquil forest- Extreme Cream Jar- W9a	23.4	NO INFO
Super Silver Haze- W23	23	No INFO														Critical Mass 1937 Farms- W16a	23.4	NO INFO
Shiatsu Kush- W23	23	NO INFO														OGKB Liberty Reach- W16a	23.4	NO INFO
Pink Taco (Pre-roll)- W23	23	No INFO														Abusive OG Pre Roll Platinum Gardens- W16a	23.4	NO INFO
Super Silver Haze (Pre-roll)- W23	23	NO INFO														Purple Dream Pre Roll 1g Honu- W16a	23.4	0.4
Diamond- W4b	23	NO INFO														Crash Test Dummy- Fifty Fold- W20a	23.4	NO INFO
Blackberry Kush- W4b	23	NO INFO														Buddha- G-13- W28	23.4	0.01
Blueberry DJ Short- W4b	23	NO INFO														Candy Apple- W32	23.4	NO INFO
Orange Kush- W4b	23	NO INFO														Flower Green Crack B-Buds- W34	23.4	No INFO
Primus- W4b	23	8														Shake Green Crack- W34	23.4	NO INFO
Dutchberry- W4b	23	NO INFO														Joints Green Crack (Preroll)-W34	23.4	NO INFO
Lemon OG- W4b	23	NO INFO														New Glue- W36	23.4	NO INFO
Tangerine Dream- W4b	23	NO INFO														Marmalade- W36	23.4	NO INFO
Grease Monkey- W4b	23	NO INFO														Allen Wrench- W37	23.4	0.3
Snow Monster- W4b	23	NO INFO														Vortex- W33	23.41	0.2
OG Kush- W4b	23	NO INFO														Grape of God- W33	23.43	0.1
GG4- W4b	23	NO INFO														Sour Diesel Joint (pre-roll)- W37	23.43	0
Golden Pineapple preroll- W4b	23	No INFO														Girl Scout Cookies Preroll- W32	23.44	1.32
12th Man Preroll- W4b	23	No INFO														OG Chem- W25	23.45	NO INFO
Cynex preroll- W4b	23	NO INFO														Lemon Meringue PreRolls- W25	23.46	NO INFO
GG pre roll- W4b	23	No INFO														MK Ultra- W1	23.47	NO INFO
Death Star- W24	23	NO INFO														Chem Mint Cookies- W32	23.47	0.11
Major Tom- W25	23	NO INFO														Green Dream- W33	23.47	0
Salmonberry- W25	23	No INFO														Tangie Cookies-W37	23.49	0.11
Royal Plum PreRoll- W25	23	0														Cookie Breath- REUP- W7a	23.5	NO INFO
FG- Lemon OG- W28	23	NO INFO														Skywalker OG- Dutchy- W7a	23.5	NO INFO
Acapulco Gold- W30	23	NO INFO														Sour Strawberry Kush Platinum- Phat Panda- W7a	23.5	0.3
Green Crack- Clandestine- W30	23	NO INFO														Tranquil Forest- Gilz Nilz Jar- W9a	23.5	NO INFO
Primo Popcorn- Secret Recipe- W30	23	NO INFO														Chocolate LemDawg Dream City- W16a	23.5	NO INFO
Chemdawg Sour- W30	23	NO INFO														Super Lemon Haze- Western Cultured (Pre-roll)- W20a	23.5	NO INFO
Cookies and Cream- W30	23	NO INFO														Afghan- W23	23.5	No INFO
Orange Cookies- Sub X- W30	23	NO INFO														Orange Kush (Pre-roll)- W23	23.5	NO INFO
Platinum GSC- W30	23	NO INFO														Fruit Punch- W25	23.5	NO INFO
Acapulco Gold- W30	23	NO INFO														Hashtag OG Preroll- W33	23.5	0
Green Crack- Clandestine- W30	23	NO INFO														Querkle Preroll-W35	23.5	0.9
Primo Popcorn- Secret Recipe- W30	23	NO INFO														G Cut- W36	23.5	NO INFO
Chemdawg Sour- W30	23	NO INFO														Super Nova- W36	23.5	NO INFO
Cookies and Cream- W30	23	NO INFO														Sunset Sherbet Mini Buds- W37	23.5	0.11
Orange Cookies- Sub X- W30	23	NO INFO														Sunset Sherbert- W1	23.54	NO INFO
Platinum GSC- W30	23	0.23														Afghan Joint- W39	23.54	0.29
Cindy 99- W32	23	0.7														RYO Dutchberry- W1	23.55	NO INFO
Joint Lemon OG (Preroll)- W34	23	NO INFO														Star Dawg- W37	23.55	0.06
Colorado Clementine #5- W36	23	No INFO														Hash Plant- W1	23.6	NO INFO
Cookies Kush- W36	23	NO INFO														Mango Kush- Golden Tree- W7a	23.6	NO INFO
Cuvee- W36	23	NO INFO														WiFi OG Tiny Trees- Treehawk Farms- W7a	23.6	NO INFO
Wi-Fi- W36	23	NO INFO														Top Cut- Paris OG- W9a	23.6	NO INFO
Bruce Banner Sun Grown- W36	23	NO INFO														Dutch Treat by Cascade Growers- W18	23.6	NO INFO
Hazelnut Cream- W36	23	0.19														Zambian Sonic Green- W16a	23.6	NO INFO
Canna Aloha- W37	23.005	No INFO														SPP Trap Star (Indica Preroll)- W9b	23.6	0.5
Pineapple Express- W24	23.01	1.99														Mt. Rainier #10- W25	23.6	NO INFO
Y Griega by Pure Funk- W8	23.02	0.12														ART- Galactic Glue Preroll- W28	23.6	0.04
Cookies n Cream- W32	23.03	0														Flower Super Silver Haze- W34	23.6	NO INFO
Sour Headband- W12	23.03	0.05														Dutch Treat- W35	23.6	NO INFO
SQ- Blue Dream- W28	23.04	1.13														GSC Preroll- W35	23.6	0.3
Tangerine Haze- W37	23.07	NO INFO														Jenny Kush- W36	23.6	NO INFO
Green Crack (Pre-roll)- W23	23.07	NO INFO														One Love- W39	23.61	0.07
Pineapple Express (Pre-roll)- W23	23.07	0														Ogre Kush- W25	23.63	NO INFO
Grapefruit- W32	23.08	NO INFO														Wi Fi O.G. by Lazy Bee Gardens- W8	23.64	1.56
Trickster OG- W24	23.09	0														Trainwreck- W39	23.65	0.3
Tahoe OG- W37	23.1	NO INFO														Blue Dream- W33	23.67	0.4
Snoop's Dream- Treehawk Farms- W7a	23.1	0.5														9 lb Hammer- W2	23.7	0
Eco Budz- Blue Bastard- W9a	23.1	0.6														Wedding Cake- Exotikz- W7a	23.7	No INFO
Harmony Farms- Jack OG- W9a	23.1	NO INFO														Blackberry Kush by Craft Cannabis- W18	23.7	0.1
Green Crack by Cascade Growers- W18	23.1	0														Quantum Leap Artizen- W16a	23.7	NO INFO
DutchTreat by Washington State Sweet Leaf Gardens- W18	23.1	1														Space Goo Artizen - W16a	23.7	NO INFO
Blueberry Trainwreck Olympia Cannabis- W16a	23.1	NO INFO														SPP Liberty Haze (Hybrid Preroll)- W9b	23.7	No INFO
Granddaddy Dutch Clandestine- W16a	23.1	NO INFO														Flavor Blue- W24	23.7	NO INFO
Grape Ape Pre Roll 0.5g Artizen- W16a	23.1	1.1														Goji OG- W25	23.7	NO INFO
Skunk #1- Inflorescence- W20a	23.1	NO INFO														LA Confidential- W32	23.7	1
GG#5 Popcorn Buds- W25	23.1	NO INFO														LA Confidential Preroll- W32	23.7	NO INFO
Bozeman Blue- W25	23.1	0.1														Flower Green Crack- W34	23.7	No INFO
ELLA- Lemon OG Haze- W28	23.1	0														Blackberry Kush- W35	23.7	0.1
ELLA- Lemon OG Haze Preroll- W28	23.1	NO INFO														Diesel- W36	23.7	NO INFO
Blue Power- W32	23.1	0.19														Double Dream- W25	23.73	2.06
Arcata Trainwreck Preroll- W33	23.1	0														Orange Blossom by Falcanna- W8	23.77	0.09
Chunk Dawg Preroll- W33	23.1	0														Black Diesel- W33	23.77	0.09
Dutch Treat- W35	23.1	NO INFO														Purple Kush- Snickle Fritz- W7a	23.8	NO INFO
Pink Cookies- W36	23.1	No INFO														Butter Cookie Crumbs- Cookie Jar Cannabis- W7a	23.8	NO INFO
Holy Grail- W36	23.11	0														Chernobyl- Dutchy- W7a	23.8	0.5
Super Lemon Haze- W32	23.12	NO INFO														Starrdawg- Dutchy- W7a	23.8	0.2
Power Diesel- W6	23.14	0														Lamb's Bread by Cascade Growers- W18	23.8	NO INFO
Big Bud Preroll- W33	23.16	0.04														La Confidential by Washington State Sweet Leaf Gardens- W18	23.8	0
DS- GG4- W28	23.16	0.7														Pink- Windy River- W20a	23.8	NO INFO
Green Crack- W37	23.19	0														Cannabelle Sour Banana x Harlequin- W21a	23.8	NO INFO
SQ-Skunk- W28	23.19	0														Cherry Pie- W25	23.8	NO INFO
Kimbo Kush- W33	23.2	No INFO														Lamb's Bread- W35	23.8	NO INFO
Alien Dawg- Nebula- W7a	23.2	NO INFO														La Confidential- W35	23.8	0
Frosted Cherry Cookies- Liberty Reach- W7a	23.2	NO INFO														Space Cand Preroll- W35	23.8	0.2
Lemon Marmalade- Platinum Gardens- W7a	23.2	No INFO														Lifted OG- W36	23.8	NO INFO
Liberty Reach- Frosted Strawberries- W9a	23.2	NO INFO														Blood Diamond- W36	23.8	NO INFO
Berry White by Cascade Growers- W18	23.2	0														Bubba's Gift- W36	23.8	NO INFO
UW by Outlaw Cannabis- W18	23.2	NO INFO														Blackberry Chem Og- W36	23.8	NO INFO
SPP Lodi Dodi (Sativa Preroll)- W9b	23.2	0.4														Dutch Treat PreRols- W25	23.81	NO INFO
Green Crack- Green420- W20a	23.2	NO INFO														Cookies N Cream- W37	23.83	0.09
Super Lemon Haze- W23	23.2	0														Cookies n Cream- W32	23.84	0.14
Gummo Preroll- W32	23.2	NO INFO														Pink Cookies- W1	23.86	NO INFO
Berry White- W35	23.2	0														Treedom- 9# Hammer- W9a	23.9	NO INFO
[truncated: 838 more rows]

## Sheet: Washington- Rec
Strain	THC	CBD		Strain < 5%	THC	CBD		Strain 5 - 10% THC	THC	CBD		Strain 10-15% THC	THC	CBD		Strain > 15% THC	THC	CBD
Therapy- W38	0.5	9.9		Therapy- W38	0.5	9.9		Shark Shock CBD- W15	5.2	9.3		OMG Sweet & Sour Widow LZB9- W13a	10.1	8		Sour Diesel- W8a	15.1	NO INFO
Sour Tsunami High Five Farms- w16b	0.7	13.2		Sour Tsunami High Five Farms- w16b	0.7	13.2		RRF Stephen King OGI1- W13a	5.3	9.6		OMG Sweet& Sour Widow LZBO- W13a	10.1	8		Black Berry Kush Viva- w16b	15.1	NO INFO
CBD Revival- W29	0.7	16.8		CBD Revival- W29	0.7	16.8		RRF Stephen King OGI2- W13a	5.3	9.6		OMG Sweet and Sour Widow- W31	10.1	8		Northern Lights Hilltop- w16b	15.1	0.2
CBD Yummy- W27	0.75	19.25		CBD Yummy- W27	0.75	19.25		Harlequin GDP- W8a	5.4	7.4		LG OG- B-Grade- W11	10.3	0.1		Gabriel Sunny G- W31	15.1	0.2
Sour Tsunami- W29	0.8	16.6		Sour Tsunami- W29	0.8	16.6		Empire Harlequin XZZR- W13a	5.5	10.7		AK 420 D&S - w16b	10.4	0.5		Purple Kush- W38	15.1	NO INFO
Granddaddy Purple by Xclusive-W3a	0.9	1		Granddaddy Purple by Xclusive-W3a	0.9	1		Empire Harlequin Y01N- W13a	5.5	10.7		White Widow- W13b	10.5	11.3		FF AK- 47 AR4I- W13a	15.2	NO INFO
Leaf Werx CBD Suzy Q UGCW- W13a	0.9	16.5		Leaf Werx CBD Suzy Q UGCW- W13a	0.9	16.5		Harlequin CBD Preroll- W26	5.6	9.7		White Widow by Phat Panda-W3a	10.7	10.4		Ace of Spades Forte Farms- w16b	15.2	No INFO
Atomic- W29	0.9	0		Atomic- W29	0.9	0		CBD Mango Haze Popcorn Buds by Artizen-W3a	5.9	6.1		CBD Nordle PR- W13b	10.7	11.4		Dutch Treat D&S- w16b	15.2	NO INFO
Canna Tsu- W13b	0.9	22.6		Canna Tsu- W13b	0.9	22.6		Harlequin X GDP- W11	5.9	9.8		Big Purps Joint- W38	10.7	0.3		Herijuana Jack 33 Virginia Co- w16b	15.2	NO INFO
AC/DC- W11	0.95	13		AC/DC- W11	0.95	13		CBD Blue Shark Olympia- w16b	5.9	10.2		Big Buddha Cheese- W8a	10.9	NO INFO		Shangri-La PreRoll 2x .5g Sticky Budz- w16b	15.2	0.2
Canna Tsu CBD Liberty Reach- w16b	1	23.5		Canna Tsu CBD Liberty Reach- w16b	1	23.5		CBD Blue Shark 1g Pre-Rolls Olympia- w16b	5.9	10.2		NWCS Big Buddha Cheese- W31	10.9	NO INFO		Grape God- W26	15.2	NO INFO
Thunderstruck CBD- W10	1.02	13.38		Thunderstruck CBD- W10	1.02	13.38		CBD Blue Shark Preroll 2x.5 Olympia- w16b	5.9	10.2		Shark Shock CBD- W13b	10.9	11.3		9lb Hammer- W38	15.2	0.6
CBD Blessings- W8a	1.1	12.1		CBD Blessings- W8a	1.1	12.1		FTS- Omrita CBD- W13b	5.9	8.4		Colombian Gold by Xclusive-W3a	11	NO INFO		9lb Hammer (ninja)- W38	15.2	0.6
RRF AVI OGHF-W13a	1.1	14.2		RRF AVI OGHF-W13a	1.1	14.2		CBD Penny Wiser by Western Cultured-W3a	6	6.8		Harlequin- W11	11.05	9.45		Amnesia- W10	15.26	NO INFO
RRF AVI OGHG-W13a	1.1	14.2		RRF AVI OGHG-W13a	1.1	14.2		Charlotte's Web- W11	6	11.4		Columbian Gold- W5	11.3	0.3		Grapefruit x NPH Clandestine- w16b	15.3	NO INFO
CBD Remedy- W29	1.3	13.8		CBD Remedy- W29	1.3	13.8		Sour Cyclone- CBD- W11	6	14.1		Pez Preroll- W26	11.3	NO INFO		Bubba Cherry Kush Preroll- W26	15.3	NO INFO
Blueberry Essence CBD Life Gardens- w16b	1.4	2.6		Blueberry Essence CBD Life Gardens- w16b	1.4	2.6		Frida 3 Pack (Preroll)- W19a	6	13		Trainwreck Fire Viva- w16b	11.6	NO INFO		Klingon Preroll- W31	15.3	0.2
Ac/Dc CBD- W26	1.4	12.2		Ac/Dc CBD- W26	1.4	12.2		CBD Hawaiian Dream by Moani-W3a	6.4	11.2		Sour Tsunami Shake- W5	11.7	10.9		Elmers Glue- W11	15.4	0.1
Moon Cookies Preroll- W29	1.4	0.5		Moon Cookies Preroll- W29	1.4	0.5		CBD Mango Haze Popcorn Buds by Artizen-W3a	6.8	8.3		Black Lime Reserve Small Buds Koala Canyon- w16b	11.8	0.3		AK 47 Hilltop Growers- w16b	15.4	NO INFO
Suzy Q- W38	1.5	15.8		Suzy Q- W38	1.5	15.8		"H" Joint by Green Haven (Preroll)- W19a	7	10		Tutankhamon Chipper- w16b	11.8	NO INFO		Washington Apple Forte Farms- w16b	15.4	No INFO
Chunk Berry - W15	2.1	0.2		Chunk Berry - W15	2.1	0.2		Dipped Remedy CBD Pre-Roll 1g Green Labs- w16b	7.2	26.6		Cinex 5g. Landrace- w16b	11.8	NO INFO		Washington Apple Pre-Roll 1g. Forte Farms- w16b	15.4	No INFO
Avi (RR)- W3	2.1	10.4		Avi (RR)- W3	2.1	10.4		CBD Mango Haze by Artizen-W3a	7.3	9.5		Thai Girl Infused Pre-Roll 1g Liberty Reach-w16b	11.9	NO INFO		Tsi Fly- W11	15.5	0.1
Empire CBD GSC YO13- W13a	4.1	8.7		Empire CBD GSC YO13- W13a	4.1	8.7		Frida by Raven Grass- W19a	7.37	14.81		Kiwi Gangster PreRoll 2x.5 Sticky Budz- w16b	12	0.2		Purple Champagne Top Shelf-w16b	15.5	No INFO
Medi Haze Dream City- w16b	4.1	8.8		Medi Haze Dream City- w16b	4.1	8.8		Purple Pleides- CBD- W11	7.4	7.8		OG Chem BB- W5	12.1	NO INFO		Citrus Kush 1g Pre-Roll Artizen- w16b	15.5	0.2
CBD Sweet and Sour Widow by Moani-W3a	4.7	6.5		CBD Sweet and Sour Widow by Moani-W3a	4.7	6.5		Critical Mass CBD- W10	7.6	12.2		FF Blackberry Kush ARD4- W13a	12.2	NO INFO		Dub Kush 1.5g Joint Hempire- w16b	15.5	0.3
Aliens on Moonshine- W13b	4.8	13		Aliens on Moonshine- W13b	4.8	13		CBD Mango Haze Popcorn Buds by Artizen -W3a	7.7	9.8		Berry White Alta Nova- w16b	12.2	NO INFO		Agent Orange- W38	15.5	NO INFO
Shark Shock CBD- W15	5.2	9.3						CBD Critical Mass by Artizen-W3a	7.7	12		PBB X SSS- w16b	12.3	0.4		Key Lime Pie by Elevate Cannabis-W3a	15.6	NO INFO
RRF Stephen King OGI1- W13a	5.3	9.6						Artizen Mango Haze Break- W13a	7.7	9.6		PBB X SSS Chipper- w16b	12.3	NO INFO		Grape Ape Hilltop Growers- w16b	15.6	0.6
RRF Stephen King OGI2- W13a	5.3	9.6						Artizen Mango Haze NSR4- W13a	7.7	9.6		Elmer's Glue #7 1g. Pre-roll Pr%ff- w16b	12.5	NO INFO		Black Berry Kush 1g Pre-Roll Artizen- w16b	15.6	0.2
Harlequin GDP- W8a	5.4	7.4						Artizen Mango Haze Q4F2- W13a	7.7	9.6		Pez Preroll Pack 3g Solstice Pro- w16b	12.5	NO INFO		Catatonic 1g Pre-Roll Root Down- w16b	15.6	NO INFO
Empire Harlequin XZZR- W13a	5.5	10.7						Artizen Mango Haze VZVS- W13a	7.7	9.6		Conoisseurs BB Kush- W13b	12.5	NO INFO		Ghost Train Haze 1g. Pre-Roll Pr%ff- w16b	15.6	NO INFO
Empire Harlequin Y01N- W13a	5.5	10.7						Mango Haze Pre-Roll Artizen- w16b	7.7	9.6		Purple Diesel Chipper- w16b	12.6	NO INFO		Bubba Cherry Kush- W26	15.6	NO INFO
Harlequin CBD Preroll- W26	5.6	9.7						Mango Haze Artizen -w16b	7.8	10		Aphrodite- W10	12.62	NO INFO		Space Berries by SPP-W3a	15.7	NO INFO
CBD Mango Haze Popcorn Buds by Artizen-W3a	5.9	6.1						CBD Critical Mass Popcorn Buds by Artizen-W3a	8	13.9		BMF BB Bettie Page 0515- W13a	12.8	NO INFO		Heavenly Hydro- W11	15.7	0.2
Harlequin X GDP- W11	5.9	9.8						Critical Mass 1g Pre-Roll Artizen- w16b	8	13.9		BMF BB Bettie Page 0520- W13a	12.8	NO INFO		CIN99- W26	15.8	NO INFO
CBD Blue Shark Olympia- w16b	5.9	10.2						White Widow- W8a	8.1	9.5		OG Sour 1g Pre-Roll Artizen- w16b	12.8	No INFO		Nine Pound Hammer- W8a	15.9	NO INFO
CBD Blue Shark 1g Pre-Rolls Olympia- w16b	5.9	10.2						Dance World CBD- W8a	8.4	8.6		Trainwreck fire- w16b	12.9	No INFO		Big Purple Fire 420Sale- w16b	15.9	0.3
CBD Blue Shark Preroll 2x.5 Olympia- w16b	5.9	10.2						Night Moves Blend (Preroll)- W19a	8.4	3		Lemon Lime OG 1g Pre-Roll Artizen- w16b	12.9	NO INFO		A train Pre-Roll 1g SunCliff- w16b	15.9	0.7
FTS- Omrita CBD- W13b	5.9	8.4						CBD Critical Mass Popcorn Buds by Artizen-W3a	8.6	14.9		tangie 1g. Pre-roll Pr%ff- w16b	12.9	NO INFO		Originial Sour Diesel PreRoll 2x .5g Sticky Budz- w16b	15.9	0.2
CBD Penny Wiser by Western Cultured-W3a	6	6.8						GSC CBD- W10	8.9	16.9		Green Queen 1g Pre-Roll Artizen- w16b	13.1	NO INFO		Clementine- W8a	16	NO INFO
Charlotte's Web- W11	6	11.4						Ferrari Fume- W27	8.9	13.7		Banana Kush by Dogtown Pioneers-W3a	13.2	0.3		Lemon Meringue- W8a	16	0.2
Sour Cyclone- CBD- W11	6	14.1						Pennywise- W29	9	8.6		Purple Persuasion by Emerald Evolution-W3a	13.2	NO INFO		Purple People Eater Hydro- W11	16	0.1
Frida 3 Pack (Preroll)- W19a	6	13						Shurman #7- W38	9.1	16.4		Purple Persuasion Smalls by Emerald Evolution-W3a	13.2	NO INFO		Honu Fire House AHVN- W13a	16	0.5
CBD Hawaiian Dream by Moani-W3a	6.4	11.2						CBD Dance World- W8a	9.2	7.5		Trim Cannalope Kush- W26	13.2	NO INFO		Golden Temple Kush Hilltop- w16b	16	NO INFO
CBD Mango Haze Popcorn Buds by Artizen-W3a	6.8	8.3						Honey Cone Charlotte's Web Preroll- W29	9.23	28		Orange Kush by Dogtown Pioneers-W3a	13.3	NO INFO		Timewreck Hilltop- w16b	16	0.8
"H" Joint by Green Haven (Preroll)- W19a	7	10						Trail Blazin Pennywise CBD- W31	9.4	8.8		SPARK- OG Crazy- W11	13.3	0.1		Vortex Fire- w16b	16	0.2
Dipped Remedy CBD Pre-Roll 1g Green Labs- w16b	7.2	26.6						CBD Critical Mass- W29	9.5	13.8		Royal Kush 1g. Pre-roll Landrace- w16b	13.3	NO INFO		Purps 3g PrerollPack Solstice- w16b	16	NO INFO
CBD Mango Haze by Artizen-W3a	7.3	9.5						Cannatonic- W13b	9.6	4.8		Lemon Skunk- W26	13.3	0.4		Secret Recipe 1g Pre-Roll Cut Above- w16b	16	NO INFO
Frida by Raven Grass- W19a	7.37	14.81						PYWS CBD- W26	10	9.4		Sin Mint Fire- w16b	13.4	NO INFO		Sour Tangie by Skord- W19a	16	NO INFO
Purple Pleides- CBD- W11	7.4	7.8						CBD Nordle- W13b	10	12.9		Critical Mass Artizen- w16b	13.5	13		Space Candy- W26	16	NO INFO
Critical Mass CBD- W10	7.6	12.2						CBd Nordle's- W13b	10	12.9		Kaboom Suncliff- w16b	13.5	NO INFO		Harlequin- W38	16	NO INFO
CBD Mango Haze Popcorn Buds by Artizen -W3a	7.7	9.8						Blue Rasp Weedrita Sugar (preroll)- W13b	10	NO INFO		Big Buddah Cheese Minid Buds NWCS- w16b	13.6	NO INFO		Mendo Afgoo- W8a	16.1	0.8
CBD Critical Mass by Artizen-W3a	7.7	12										Marmalade- W8a	13.7	11		Sunny G- W8a	16.1	0.2
Artizen Mango Haze Break- W13a	7.7	9.6										Hog- W10	13.72	NO INFO		Cokies and Cream Top Shelf- w16b	16.1	NO INFO
Artizen Mango Haze NSR4- W13a	7.7	9.6										E E Purple Persuasion Shake- W31	13.8	0.2		Cookies N' Cream Lifted- w16b	16.1	NO INFO
Artizen Mango Haze Q4F2- W13a	7.7	9.6										Ace of Haze- W15	13.9	NO INFO		Quantum Hammer Freedom- w16b	16.1	0.3
Artizen Mango Haze VZVS- W13a	7.7	9.6										Dairy Queen Fire- w16b	13.9	0.2		Blue Cinex by SPP-W3a	16.2	0.5
Mango Haze Pre-Roll Artizen- w16b	7.7	9.6										Tangerine Dream- W8a	14	NO INFO		Death Star- W8a	16.2	0.2
Mango Haze Artizen -w16b	7.8	10										Boggle Dragon- W13b	14	NO INFO		Agent Orange Freedom-w16b	16.2	0.3
CBD Critical Mass Popcorn Buds by Artizen-W3a	8	13.9										Grape Ape- W13b	14	NO INFO		Barney Rubble Liberty Reach- w16b	16.2	NO INFO
Critical Mass 1g Pre-Roll Artizen- w16b	8	13.9										Headband- W13b	14	NO INFO		Tangieland PreRoll 1g Trumph- w16b	16.2	NO INFO
White Widow- W8a	8.1	9.5										Marionberry Kush- W8a	14.1	NO INFO		Purple Lemon Haze- Dubshot- W13b	16.2	NO INFO
Dance World CBD- W8a	8.4	8.6										Juicy Fruit hilltop -w16b	14.1	NO INFO		Purple Lemon Haze- Dubshot- W13b	16.2	NO INFO
Night Moves Blend (Preroll)- W19a	8.4	3										9# Hammer Life Gardens- w16b	14.2	NO INFO		Grape Ape- W10	16.27	NO INFO
CBD Critical Mass Popcorn Buds by Artizen-W3a	8.6	14.9										Black Cherry Soda by Green 420- W19a	14.2	No INFO		MK Ultra Doc Croc- w16b	16.3	NO INFO
GSC CBD- W10	8.9	16.9										Oregon Diesel- W8a	14.3	0.2		Gorilla Grapes Bong Buddies- W13b	16.3	0.2
Ferrari Fume- W27	8.9	13.7										Northern Lights Flower- W11	14.3	0.1		Alaskan Thunder F*ck by Heavenly Buds-W3a	16.4	0.3
Pennywise- W29	9	8.6										Choco Chunk Chipper Gardens- w16b	14.3	NO INFO		Jack White by Heavenly Buds-W3a	16.4	0.2
Shurman #7- W38	9.1	16.4										Hindu Kush Alta Nova- w16b	14.3	NO INFO		Space Candy- W8a	16.4	0.3
CBD Dance World- W8a	9.2	7.5										UW Purple Chipper- w16b	14.3	No INFO		Greenrush Dr. Who O0YI- W13a	16.4	No INFO
Honey Cone Charlotte's Web Preroll- W29	9.23	28										Aliens on Moonshine Doobie- W5	14.4	0.4		Green Crack - W15	16.4	NO INFO
Trail Blazin Pennywise CBD- W31	9.4	8.8										Blue Dream Hilltop- w16b	14.4	NO INFO		BC Early Blueberry ABC Farms- w16b	16.4	NO INFO
CBD Critical Mass- W29	9.5	13.8										Cuvee Life Gardens- w16b	14.4	NO INFO		Hawaiian Mandarin Hilltop Growers- w16b	16.4	0.4
Cannatonic- W13b	9.6	4.8										Ultra Orange Freedom- w16b	14.4	1.2		Sour Bubbly Suncliff-w16b	16.4	NO INFO
PYWS CBD- W26	10	9.4										Berry Gumboldt 1g. Pre-roll Landrace- w16b	14.4	NO INFO		Night Nurse- W29	16.4	0
CBD Nordle- W13b	10	12.9										Cherry Soda 1g Pre-Roll Artizen- w16b	14.4	No INFO		Dr. Who #6- W13b	16.4	NO INFO
CBd Nordle's- W13b	10	12.9										Cheese Quake Preroll- W26	14.4	0.6		Sugar Black Rose by Silica Phoenix- W19a	16.46	No INFO
Blue Rasp Weedrita Sugar (preroll)- W13b	10	NO INFO										Green Crack by Heavenly Buds-W3a	14.5	NO INFO		Chemmy Jones by Red Label Cannabis-W3a	16.5	NO INFO
OMG Sweet & Sour Widow LZB9- W13a	10.1	8										Aliens on Moonshine- W5	14.5	NO INFO		Cookies and Cream by SPP-W3a	16.5	0.8
OMG Sweet& Sour Widow LZBO- W13a	10.1	8										Blackberry Kush Chipper- w16b	14.5	NO INFO		Master Yoda by Heavenly Buds-W3a	16.5	No INFO
OMG Sweet and Sour Widow- W31	10.1	8										Star Dawg High Tide- w16b	14.6	No INFO		FF B-52 ARG8- W13a	16.5	0.6
LG OG- B-Grade- W11	10.3	0.1										UK Cheese D&S- w16b	14.6	No INFO		Cookies Preroll- W26	16.5	0.7
AK 420 D&S - w16b	10.4	0.5										UK Cheese OZ D&S- w16b	14.6	NO INFO		Black Cherry OG by Dogtown Pioneers -W3a	16.6	NO INFO
White Widow- W13b	10.5	11.3										Romulan Pre-roll 1g NW Grown- w16b	14.6	No INFO		Gorilla Glue #4- W15	16.6	0.2
White Widow by Phat Panda-W3a	10.7	10.4										Mr. Tusk- W8a	14.7	NO INFO		Middle Fork Top Shelf- w16b	16.6	NO INFO
CBD Nordle PR- W13b	10.7	11.4										Sour Diesel- W8a	14.7	0.6		MK Ultra Fire- w16b	16.6	0.4
Big Purps Joint- W38	10.7	0.3										LACN Preroll- W26	14.7	NO INFO		Thai Girl .5g Pre-roll Liberty Reach- w16b	16.6	No INFO
Big Buddha Cheese- W8a	10.9	NO INFO										Black Cherry Soda by Dogtown Pioneers-W3a	14.8	NO INFO		Galactic Kush Joint by Slab Mechaniz/ Agro Mechaniz- W19a	16.6	NO INFO
NWCS Big Buddha Cheese- W31	10.9	NO INFO										Critique- W8a	14.8	0.2		Chocolate Chunk- W26	16.6	0.6
Shark Shock CBD- W13b	10.9	11.3										A train Popcorn Suncliff- w16b	14.8	0.6		White Lotus Preroll- W27	16.6	0
Colombian Gold by Xclusive-W3a	11	NO INFO										Cherry Cream Pie Life Gardens- w16b	14.8	NO INFO		Super Lemon Haze by Xclusive-W3a	16.7	2.5
Harlequin- W11	11.05	9.45										Dutch Treat OZ D&S	14.8	No INFO		Plushberry by SPP-W3a	16.7	NO INFO
Columbian Gold- W5	11.3	0.3										Jack Skellington by RJL-W19a	14.8	NO INFO		Spark - OG- W11	16.7	0.45
Pez Preroll- W26	11.3	NO INFO										Purple Persuasion by Emerald Evolution-W3a	14.9	0.2		Girl Scout Cookies Rochester Farms- w16b	16.7	NO INFO
Trainwreck Fire Viva- w16b	11.6	NO INFO										Purple Persuasion Trim by Emerald Evolutio-W3a	14.9	0.2		Timewreck Chipper Gardens- w16b	16.7	NO INFO
Sour Tsunami Shake- W5	11.7	10.9										XO New York City Diesel- W5	14.9	NO INFO		Sensi Star by Dama-W3a	16.8	0.2
Black Lime Reserve Small Buds Koala Canyon- w16b	11.8	0.3										Cheese Life Gardens- w16b	14.9	NO INFO		Snoop's Dream- W8a	16.8	NO INFO
Tutankhamon Chipper- w16b	11.8	NO INFO										Cookies and Cream by SPP-W3a	15	NO INFO		Ewok- W11	16.8	0.2
Cinex 5g. Landrace- w16b	11.8	NO INFO										Albino Albert- W10	15	NO INFO		Gorilla Glue #4 Bong Buddies- W15	16.8	0.2
Thai Girl Infused Pre-Roll 1g Liberty Reach-w16b	11.9	NO INFO										Blueberry Diesel Viva Cannabis- w16b	15	0.2		Agent Orange Fire- w16b	16.8	0.2
Kiwi Gangster PreRoll 2x.5 Sticky Budz- w16b	12	0.2										Blueberry Haze (Sungrown) Life Gardens- w16b	15	No INFO		Fire OG popcorn Artizen- w16b	16.8	NO INFO
OG Chem BB- W5	12.1	NO INFO										JoyStick Indica Infused Pre Roll by THC Co. (Preroll)- W19a	15	NO INFO		Gummy Bear Forte Farms- w16b	16.8	0.2
FF Blackberry Kush ARD4- W13a	12.2	NO INFO										Dutch Hawaiian's- W13b	15	0.7		Blueberry Haze 1g Pre-Roll Artizen- w16b	16.8	NO INFO
Berry White Alta Nova- w16b	12.2	NO INFO														Maui Super Dawg Pre-Roll 1g. HONU- w16b	16.8	NO INFO
PBB X SSS- w16b	12.3	0.4														Wifi- W13b	16.8	NO INFO
PBB X SSS Chipper- w16b	12.3	NO INFO														Green Crack by Emerald Evolution-W3a	16.9	NO INFO
Elmer's Glue #7 1g. Pre-roll Pr%ff- w16b	12.5	NO INFO														Green Crack Smalls by Emerald Evolution-W3a	16.9	NO INFO
Pez Preroll Pack 3g Solstice Pro- w16b	12.5	NO INFO														Cheese Quake by Dogtown Pioneers-W3a	16.9	NO INFO
Conoisseurs BB Kush- W13b	12.5	NO INFO														CK Pitbull HG- W11	16.9	0.2
Purple Diesel Chipper- w16b	12.6	NO INFO														TS Cookies & Cream 9943-W13a	16.9	0.2
Aphrodite- W10	12.62	NO INFO														TS Cookies & Cream 9945-W13a	16.9	0.2
BMF BB Bettie Page 0515- W13a	12.8	NO INFO														TS Dubshot Cookies & Cream 9944-W13a	16.9	0.2
BMF BB Bettie Page 0520- W13a	12.8	NO INFO														Cherry OG #3 Sourface- w16b	16.9	0.4
OG Sour 1g Pre-Roll Artizen- w16b	12.8	No INFO														Maximillian Hilltop Growers- w16b	16.9	NO INFO
Trainwreck fire- w16b	12.9	No INFO														Vortex Fire 420Sale- w16b	16.9	0.4
Lemon Lime OG 1g Pre-Roll Artizen- w16b	12.9	NO INFO														Critical Kush by Belladonna- W19a	16.9	NO INFO
tangie 1g. Pre-roll Pr%ff- w16b	12.9	NO INFO														LA Confidential by Dama-W3a	17	NO INFO
Green Queen 1g Pre-Roll Artizen- w16b	13.1	NO INFO														NL Skunk - W8a	17	NO INFO
Banana Kush by Dogtown Pioneers-W3a	13.2	0.3														Aurum OG- W10	17	NO INFO
Purple Persuasion by Emerald Evolution-W3a	13.2	NO INFO														Mr. Tusk- W10	17	NO INFO
Purple Persuasion Smalls by Emerald Evolution-W3a	13.2	NO INFO														Dr. Who- W11	17	0
Trim Cannalope Kush- W26	13.2	NO INFO														The 12th Gram- W11	17	0.2
Orange Kush by Dogtown Pioneers-W3a	13.3	NO INFO														TS Blackberry Kush 9940- W13a	17	0.2
SPARK- OG Crazy- W11	13.3	0.1														TS Blackberry Kush 9942- W13a	17	0.2
Royal Kush 1g. Pre-roll Landrace- w16b	13.3	NO INFO														TS Dubshot Blackberry Kush 9941- W13a	17	0.2
Lemon Skunk- W26	13.3	0.4														Candy Kush- W15	17	NO INFO
Sin Mint Fire- w16b	13.4	NO INFO														Gorilla Glue 4- W15	17	NO INFO
Critical Mass Artizen- w16b	13.5	13														P-91- W15	17	0.4
Kaboom Suncliff- w16b	13.5	NO INFO														Chernobyl Red Frog- w16b	17	0.3
Big Buddah Cheese Minid Buds NWCS- w16b	13.6	NO INFO														Blackberry Diesel by Doctor and Crook- W19a	17	NO INFO
Marmalade- W8a	13.7	11														Romulan by Soulshine Cannabis- W19a	17	No INFO
Hog- W10	13.72	NO INFO														Pink Lemonaid's- W13b	17	0.2
E E Purple Persuasion Shake- W31	13.8	0.2														Bubbleberry- W38	17	NO INFO
Ace of Haze- W15	13.9	NO INFO														Pitbull- W29	17.01	0.14
Dairy Queen Fire- w16b	13.9	0.2														Black Chery Soda- W10	17.02	NO INFO
Tangerine Dream- W8a	14	NO INFO														SPARK- OG-Hydro- W11	17.05	0.1
Boggle Dragon- W13b	14	NO INFO														Green Supreme Shake by Hempkings-W3a	17.1	0.2
Grape Ape- W13b	14	NO INFO														Ewok by Soulshine Cannabis-W3a	17.1	NO INFO
Headband- W13b	14	NO INFO														White Widow Bong Buddies- W5	17.1	0.3
Marionberry Kush- W8a	14.1	NO INFO														Jedi OG- W8a	17.1	0.5
Juicy Fruit hilltop -w16b	14.1	NO INFO														Maui Waui Hilltop- w16b	17.1	NO INFO
9# Hammer Life Gardens- w16b	14.2	NO INFO														Sherbet Hilltop- w16b	17.1	NO INFO
Black Cherry Soda by Green 420- W19a	14.2	No INFO														Double Dream Preroll- W26	17.1	NO INFO
Oregon Diesel- W8a	14.3	0.2														LA Confidential- W29	17.13	0.1
Northern Lights Flower- W11	14.3	0.1														Chocolate Chunk- W27	17.15	0
Choco Chunk Chipper Gardens- w16b	14.3	NO INFO														Gooberry by Artizen-W3a	17.2	NO INFO
Hindu Kush Alta Nova- w16b	14.3	NO INFO														CK Cinex HG- W11	17.2	0.7
UW Purple Chipper- w16b	14.3	No INFO														Cookie Wreck Shake- W11	17.2	0.1
Aliens on Moonshine Doobie- W5	14.4	0.4														Dutch Treat- W11	17.2	0.9
Blue Dream Hilltop- w16b	14.4	NO INFO														PLC White Fire Og 1452-W13a	17.2	NO INFO
Cuvee Life Gardens- w16b	14.4	NO INFO														PLC Wifi FI OG 1453-W13a	17.2	NO INFO
Ultra Orange Freedom- w16b	14.4	1.2														God's Gift Bong Buddies- W15	17.2	0.2
Berry Gumboldt 1g. Pre-roll Landrace- w16b	14.4	NO INFO														LA Soda Pre Roll 1g WeedBush- w16b	17.2	NO INFO
Cherry Soda 1g Pre-Roll Artizen- w16b	14.4	No INFO														Orange Rush .75g pre-roll Hempkings- w16b	17.2	NO INFO
Cheese Quake Preroll- W26	14.4	0.6														CBD Lilly- W27	17.2	0
Green Crack by Heavenly Buds-W3a	14.5	NO INFO														Snowdawg- W27	17.2	0
Aliens on Moonshine- W5	14.5	NO INFO														Cookies and Cream- W27	17.2	2.4
Blackberry Kush Chipper- w16b	14.5	NO INFO														Blue Dream by Artizen-W3a	17.3	0.2
Star Dawg High Tide- w16b	14.6	No INFO														Blue Dream Popcorn Buds by Artizen-W3a	17.3	0.2
UK Cheese D&S- w16b	14.6	No INFO														Lemon Kush- W8a	17.3	0.2
UK Cheese OZ D&S- w16b	14.6	NO INFO														Empire Colombian Gold XZZI- W13a	17.3	NO INFO
Romulan Pre-roll 1g NW Grown- w16b	14.6	No INFO														707 Headband Seattle's Private Reserve- w16b	17.3	NO INFO
Mr. Tusk- W8a	14.7	NO INFO														G13 Popcorn Artizen- w16b	17.3	NO INFO
Sour Diesel- W8a	14.7	0.6														Bubbleberry 1g. Pre-roll Top shelf- w16b	17.3	No INFO
LACN Preroll- W26	14.7	NO INFO														Velvet Pie Preroll 1g Libery Reach- w16b	17.3	NO INFO
Black Cherry Soda by Dogtown Pioneers-W3a	14.8	NO INFO														Sunset Sherbet- W26	17.3	NO INFO
Critique- W8a	14.8	0.2														Gabriel Gummo- W31	17.3	0.2
A train Popcorn Suncliff- w16b	14.8	0.6														Fruity Pebbles- W8a	17.4	0.8
Cherry Cream Pie Life Gardens- w16b	14.8	NO INFO														Tahoe OG- W8a	17.4	NO INFO
Dutch Treat OZ D&S	14.8	No INFO														Jack Herer- W15	17.4	0.2
Jack Skellington by RJL-W19a	14.8	NO INFO														Cherry OG #2 Viva- w16b	17.4	NO INFO
Purple Persuasion by Emerald Evolution-W3a	14.9	0.2														Husky Kush Cannaman- w16b	17.4	0.4
Purple Persuasion Trim by Emerald Evolutio-W3a	14.9	0.2														Ace of Spades 1g. Pre roll Forte Farms- w16b	17.4	NO INFO
XO New York City Diesel- W5	14.9	NO INFO														Dosi Pie PreRoll 1g Liberty Reach- w16b	17.4	No INFO
Cheese Life Gardens- w16b	14.9	NO INFO														Space Wrangler Og- W26	17.4	1
Cookies and Cream by SPP-W3a	15	NO INFO														GP BLK MNT x JOG- W13b	17.4	NO INFO
Albino Albert- W10	15	NO INFO														Mendo Breath Preroll- W29	17.45	0
Blueberry Diesel Viva Cannabis- w16b	15	0.2														Royal Quen- W27	17.49	0
Blueberry Haze (Sungrown) Life Gardens- w16b	15	No INFO														Romulan by Soulshine Cannabis -W3a	17.5	0.3
JoyStick Indica Infused Pre Roll by THC Co. (Preroll)- W19a	15	NO INFO														The Pineapple by Artizen-W3a	17.5	0.6
Dutch Hawaiian's- W13b	15	0.7														Sour Grape Liberty Reach -w16b	17.5
Sour Diesel- W8a	15.1	NO INFO														GG4 by Doc & Crook (Preroll)- W19a	17.5	NO INFO
Black Berry Kush Viva- w16b	15.1	NO INFO														Royal Kush- W13b	17.5	1
Northern Lights Hilltop- w16b	15.1	0.2														Carl Sagan- W10	17.57	NO INFO
Gabriel Sunny G- W31	15.1	0.2														Island Lavender by Western Cultured-W3a	17.6	0.3
Purple Kush- W38	15.1	NO INFO														Blue Bird Small Bud by Emerald Evolution -W3a	17.6	NO INFO
FF AK- 47 AR4I- W13a	15.2	NO INFO														Harlequin- W8a	17.6	11.5
Ace of Spades Forte Farms- w16b	15.2	No INFO														Super Lemon Haze- W8a	17.6	NO INFO
Dutch Treat D&S- w16b	15.2	NO INFO														Casey Quantum Buddha- w16b	17.6	0.2
Herijuana Jack 33 Virginia Co- w16b	15.2	NO INFO														Pineapple Chunk ABC Farms- w16b	17.6	NO INFO
Shangri-La PreRoll 2x .5g Sticky Budz- w16b	15.2	0.2														Jack of Spades Pre-Roll 1.2g Lazy Bee- w16b	17.6	NO INFO
Grape God- W26	15.2	NO INFO														Tangie- W26	17.6	0.5
9lb Hammer- W38	15.2	0.6														Mango Kush by Dogtown Pioneers-W3a	17.7	0.2
9lb Hammer (ninja)- W38	15.2	0.6														Obama by Heavenly Buds-W3a	17.7	NO INFO
Amnesia- W10	15.26	NO INFO														OG Kush Budlet Flower by Dama-W3a	17.7	0.5
Grapefruit x NPH Clandestine- w16b	15.3	NO INFO														Blue Dot Alien- W8a	17.7	0.2
Bubba Cherry Kush Preroll- W26	15.3	NO INFO														Spark OG- W11	17.7	0.1
Klingon Preroll- W31	15.3	0.2														Platinum Super Glue High Tide- w16b	17.7	NO INFO
Elmers Glue- W11	15.4	0.1														The White 1g Pre Roll Emerald Fields- w16b	17.7	1.8
AK 47 Hilltop Growers- w16b	15.4	NO INFO														Freemont Troll- W26	17.7	0.3
Washington Apple Forte Farms- w16b	15.4	No INFO														Key Lime Pie- W26	17.7	NO INFO
Washington Apple Pre-Roll 1g. Forte Farms- w16b	15.4	No INFO														Promo Blue Cookies- W26	17.7	NO INFO
Tsi Fly- W11	15.5	0.1														Allen Wrench- W38	17.7	NO INFO
Purple Champagne Top Shelf-w16b	15.5	No INFO														Maui Wowie by Weedy's-W3a	17.8	NO INFO
Citrus Kush 1g Pre-Roll Artizen- w16b	15.5	0.2														Grape Ape by El Ella-W3a	17.8	NO INFO
Dub Kush 1.5g Joint Hempire- w16b	15.5	0.3														Blue Bird Trim by Emerald Evolution-W3a	17.8	NO INFO
Agent Orange- W38	15.5	NO INFO														LSD by Xclusive-W3a	17.8	NO INFO
Key Lime Pie by Elevate Cannabis-W3a	15.6	NO INFO														Blackberry Kush- W8a	17.8	NO INFO
Grape Ape Hilltop Growers- w16b	15.6	0.6														Grape Ape - W8a	17.8	NO INFO
Black Berry Kush 1g Pre-Roll Artizen- w16b	15.6	0.2														Pitbull - W8a	17.8	0.2
Catatonic 1g Pre-Roll Root Down- w16b	15.6	NO INFO														Blue Steel- W8a	17.8	NO INFO
Ghost Train Haze 1g. Pre-Roll Pr%ff- w16b	15.6	NO INFO														Raspberry Kush Premium- W11	17.8	0.2
Bubba Cherry Kush- W26	15.6	NO INFO														Green Freedom White Urkle 9UOG- W13a	17.8	0.4
Space Berries by SPP-W3a	15.7	NO INFO														Dr. Who- W15	17.8	NO INFO
Heavenly Hydro- W11	15.7	0.2														Blueberry Durban Monkey Grass- w16b	17.8	NO INFO
CIN99- W26	15.8	NO INFO														Curts GSC Rochester- w16b	17.8	NO INFO
Nine Pound Hammer- W8a	15.9	NO INFO														Champagne PreRoll 2x.05 Sticky Budz- w16b	17.8	0.2
Big Purple Fire 420Sale- w16b	15.9	0.3														CPK 1g Pre Roll Emerald Fields- w16b	17.8	1.9
A train Pre-Roll 1g SunCliff- w16b	15.9	0.7														Green Zkittlez Joint by Slab Mechanix/ Agro Mechaniz (Preroll)- W19a	17.8	NO INFO
Originial Sour Diesel PreRoll 2x .5g Sticky Budz- w16b	15.9	0.2														Pineapple Dream Preroll- W27	17.8	0
Clementine- W8a	16	NO INFO														Allen Wrench Preroll- W31	17.8	0.3
Lemon Meringue- W8a	16	0.2														Blue Bird- W13b	17.8	NO INFO
Purple People Eater Hydro- W11	16	0.1														Sensi Star by Dama-W3a	17.9	NO INFO
Honu Fire House AHVN- W13a	16	0.5														Space Goo Popcorn Buds by Artizen-W3a	17.9	NO INFO
Golden Temple Kush Hilltop- w16b	16	NO INFO														Sofa King Kush- W8a	17.9	NO INFO
Timewreck Hilltop- w16b	16	0.8														Blue City Diesel- W8a	17.9	NO INFO
Vortex Fire- w16b	16	0.2														Select Blue City Diesel- W8a	17.9	NO INFO
Purps 3g PrerollPack Solstice- w16b	16	NO INFO														PLC Animal Cookies 1466- W13a	17.9	5.8
Secret Recipe 1g Pre-Roll Cut Above- w16b	16	NO INFO														PLC Animal Cookies 1467-W13a	17.9	5.8
Sour Tangie by Skord- W19a	16	NO INFO														Blue Dream- w16b	17.9	NO INFO
Space Candy- W26	16	NO INFO														Jahmba Juice High Tide- w16b	17.9	NO INFO
Harlequin- W38	16	NO INFO														Pineapple Express ABC - w16b	17.9	1
Mendo Afgoo- W8a	16.1	0.8														Tangerine Dream Buddha- w16b	17.9	NO INFO
Sunny G- W8a	16.1	0.2														Allen Wrench 1g Pre- Roll Cut Above- w16b	17.9	0.6
Cokies and Cream Top Shelf- w16b	16.1	NO INFO														Lemon Berry Pre-Roll Artizen- w16b	17.9	0.3
Cookies N' Cream Lifted- w16b	16.1	NO INFO														Og X Cannalope Haze 1.1g pre-roll High Five Farms- w16b	17.9	0.2
Quantum Hammer Freedom- w16b	16.1	0.3														Citrus Kiss- W26	17.9	0.2
Blue Cinex by SPP-W3a	16.2	0.5														Kandy Kush- W26	17.9	0.3
Death Star- W8a	16.2	0.2														Tiramisu Preroll- W27	17.9	0
Agent Orange Freedom-w16b	16.2	0.3														Sky High Green Crack- W31	17.9	NO INFO
Barney Rubble Liberty Reach- w16b	16.2	NO INFO														Blueberry- W29	17.96	0
Tangieland PreRoll 1g Trumph- w16b	16.2	NO INFO														Treehawk OG- W10	17.97	NO INFO
Purple Lemon Haze- Dubshot- W13b	16.2	NO INFO														Jack the Ripper by Heavenly Buds-W3a	18	0
Purple Lemon Haze- Dubshot- W13b	16.2	NO INFO														The Pineapple by Artizen-W3a	18	0.4
Grape Ape- W10	16.27	NO INFO														Cherry Pie- W8a	18	NO INFO
MK Ultra Doc Croc- w16b	16.3	NO INFO														Kimbo Kush- W8a	18	NO INFO
Gorilla Grapes Bong Buddies- W13b	16.3	0.2														Limesicle- W8a	18	0.9
Alaskan Thunder F*ck by Heavenly Buds-W3a	16.4	0.3														Orange Marmalade- W10	18	NO INFO
Jack White by Heavenly Buds-W3a	16.4	0.2														Lemon Meringue- W10	18	NO INFO
Space Candy- W8a	16.4	0.3														OMG Hawaiian Punch E7FE- W13a	18	NO INFO
Greenrush Dr. Who O0YI- W13a	16.4	No INFO														Agent Orange Gaga- w16b	18	NO INFO
Green Crack - W15	16.4	NO INFO														Gorilla Glue Fire- w16b	18	0.2
BC Early Blueberry ABC Farms- w16b	16.4	NO INFO														Mr. Nice Hilltop- w16b	18	NO INFO
Hawaiian Mandarin Hilltop Growers- w16b	16.4	0.4														XJ-13 Noble- w16b	18	NO INFO
Sour Bubbly Suncliff-w16b	16.4	NO INFO														Green Crack Green Haven- W19a	18	NO INFO
Night Nurse- W29	16.4	0														Buddha Tahoe by RJL- W19a	18	NO INFO
Dr. Who #6- W13b	16.4	NO INFO														Master Yoda by Heavenly Buds- W19a	18	NO INFO
Sugar Black Rose by Silica Phoenix- W19a	16.46	No INFO														Blue Dream by Doc & Crook (Preroll)- W19a	18	NO INFO
Chemmy Jones by Red Label Cannabis-W3a	16.5	NO INFO														Golden Pineapple Join by Phat Panda (Preroll)- W19a	18	NO INFO
Cookies and Cream by SPP-W3a	16.5	0.8														Guana Bana by Doc & Crook (Preroll)- W19a	18	NO INFO
Master Yoda by Heavenly Buds-W3a	16.5	No INFO														KushJoint by Slab Mechaniz/ Agro Mechaniz (Preroll)- W19a	18	NO INFO
FF B-52 ARG8- W13a	16.5	0.6														Lemon Sour Diesel by Doc & Crook (Preroll)- W19a	18	NO INFO
Cookies Preroll- W26	16.5	0.7														Pink Champagne by Doc & Crook (Preroll)- W19a	18	NO INFO
Black Cherry OG by Dogtown Pioneers -W3a	16.6	NO INFO														Wonder Woman Popcon nugs- W27	18	0
Gorilla Glue #4- W15	16.6	0.2														Wonder Woman Trim- W27	18	0
Middle Fork Top Shelf- w16b	16.6	NO INFO														Hawaiian Punch- W13b	18	NO INFO
MK Ultra Fire- w16b	16.6	0.4														Cookies and Cream- W13b	18	0.2
Thai Girl .5g Pre-roll Liberty Reach- w16b	16.6	No INFO														Strawberry Cough (preroll)- W13b	18	NO INFO
Galactic Kush Joint by Slab Mechaniz/ Agro Mechaniz- W19a	16.6	NO INFO														Pinepple Express- W10	18.01	0
Chocolate Chunk- W26	16.6	0.6														Cookie Wreck- Shake- W11	18.05	0.1
White Lotus Preroll- W27	16.6	0														Mendo Breath- W29	18.07	0
Super Lemon Haze by Xclusive-W3a	16.7	2.5														Green Supreme Budlets by Hempkings-W3a	18.1	0.2
Plushberry by SPP-W3a	16.7	NO INFO														Paris OG Budlets by Hempkings-W3a	18.1	NO INFO
Spark - OG- W11	16.7	0.45														Head Cheese Smalls by Emerald Evolution-W3a	18.1	0.2
Girl Scout Cookies Rochester Farms- w16b	16.7	NO INFO														9# Hammer- W5	18.1	NO INFO
Timewreck Chipper Gardens- w16b	16.7	NO INFO														Doc Croc Sugar BLK Rose 3437- W13a	18.1	NO INFO
Sensi Star by Dama-W3a	16.8	0.2														Doc Croc Sugar BLK Rose 3438- W13a	18.1	NO INFO
Snoop's Dream- W8a	16.8	NO INFO														TS Dubshot Pineapple Express 9953-W13a	18.1	0.9
Ewok- W11	16.8	0.2														TS Dutch Treat 9946-W13a	18.1	1
Gorilla Glue #4 Bong Buddies- W15	16.8	0.2														TS Pineapple Express 9952-W13a	18.1	0.9
Agent Orange Fire- w16b	16.8	0.2														TS Pineapple Express 9954-W13a	18.1	0.9
Fire OG popcorn Artizen- w16b	16.8	NO INFO														Black Cherry Soda Pre Roll- W15	18.1	NO INFO
Gummy Bear Forte Farms- w16b	16.8	0.2														Firewalker OG Buddha- w16b	18.1	0.2
Blueberry Haze 1g Pre-Roll Artizen- w16b	16.8	NO INFO														Jack Herer Popcorn Red Frog- w16b	18.1	NO INFO
Maui Super Dawg Pre-Roll 1g. HONU- w16b	16.8	NO INFO														Jack Herer Red Frog- w16b	18.1	NO INFO
Wifi- W13b	16.8	NO INFO														Agent Orange Preroll Pack 3g. Solstice Pro- w16b	18.1	NO INFO
Green Crack by Emerald Evolution-W3a	16.9	NO INFO														Hash Plant Tangerine Terp Stix 1g. Evergreen- w16b	18.1	0.2
Green Crack Smalls by Emerald Evolution-W3a	16.9	NO INFO														Deep Purple- W26	18.1	0.2
Cheese Quake by Dogtown Pioneers-W3a	16.9	NO INFO														Fireline Minto Chocolate Chip- W31	18.1	NO INFO
CK Pitbull HG- W11	16.9	0.2														Plushberry by SPP -W3a	18.2	0.2
TS Cookies & Cream 9943-W13a	16.9	0.2														Blue Dream by Artizen-W3a	18.2	0.2
TS Cookies & Cream 9945-W13a	16.9	0.2														Dragon Crack by El Ella-W3a	18.2	0.4
TS Dubshot Cookies & Cream 9944-W13a	16.9	0.2														SG Bruce Banner by Sun Grown-W3a	18.2	NO INFO
Cherry OG #3 Sourface- w16b	16.9	0.4														Skunk #1- W8a	18.2	NO INFO
Maximillian Hilltop Growers- w16b	16.9	NO INFO														Phat Panda- Purple Panda Reserve- W11	18.2	0.1
Vortex Fire 420Sale- w16b	16.9	0.4														Skunk #1- W11	18.2	0.1
Critical Kush by Belladonna- W19a	16.9	NO INFO														FF Presiential OG 39DU- W13a	18.2	0.2
LA Confidential by Dama-W3a	17	NO INFO														Glazed Cherries- W15	18.2	NO INFO
NL Skunk - W8a	17	NO INFO														Bubblegum Emerald Fields- w16b	18.2	1.4
Aurum OG- W10	17	NO INFO														G13 Buddha- w16b	18.2	0.2
Mr. Tusk- W10	17	NO INFO														Quantum Kush Freedom- w16b	18.2	0.4
Dr. Who- W11	17	0														Strawberry Crème 1g. Pre-roll Landrace-w16b	18.2	NO INFO
The 12th Gram- W11	17	0.2														Face Melt Preroll- W29	18.2	0.1
TS Blackberry Kush 9940- W13a	17	0.2														Clandestine Kosher Kush- W31	18.2	No INFO
TS Blackberry Kush 9942- W13a	17	0.2														Dutc Treat- W29	18.22	0
TS Dubshot Blackberry Kush 9941- W13a	17	0.2														EV Satsuma by Evolved-W3a	18.3	NO INFO
Candy Kush- W15	17	NO INFO														Dutchberry Popcorn Buds by Artizen-W3a	18.3	0.3
Gorilla Glue 4- W15	17	NO INFO														Moby Dick- W8a	18.3	NO INFO
P-91- W15	17	0.4														Critical Purple Kush- W8a	18.3	NO INFO
Chernobyl Red Frog- w16b	17	0.3														BMF Training Day 0436- W13a	18.3	NO INFO
Blackberry Diesel by Doctor and Crook- W19a	17	NO INFO														Matanuska - W15	18.3	NO INFO
Romulan by Soulshine Cannabis- W19a	17	No INFO														Dutch Treat Hilltop Growers- w16b	18.3	NO INFO
Pink Lemonaid's- W13b	17	0.2														Rude Boi og Forte Farms- w16b	18.3	0.4
Bubbleberry- W38	17	NO INFO														Aloha 0.5g Preroll Soulshine- w16b	18.3	NO INFO
Pitbull- W29	17.01	0.14														Snowdizzle- W13b	18.3	NO INFO
Black Chery Soda- W10	17.02	NO INFO														Sour Tangie- W27	18.39	0
SPARK- OG-Hydro- W11	17.05	0.1														Platinum Kush by Mother Nature's Own-W3a	18.4	NO INFO
Green Supreme Shake by Hempkings-W3a	17.1	0.2														Agent Orange by Moani-W3a	18.4	NO INFO
Ewok by Soulshine Cannabis-W3a	17.1	NO INFO														EV Spruce Lee by Evolved -W3a	18.4	NO INFO
White Widow Bong Buddies- W5	17.1	0.3														Alien Rift by Emerald Evolution-W3a	18.4	0.2
Jedi OG- W8a	17.1	0.5														Quantum Leap Popcorn Buds by Artizen-W3a	18.4	0.3
Maui Waui Hilltop- w16b	17.1	NO INFO														Solace Dobie- W5	18.4	NO INFO
Sherbet Hilltop- w16b	17.1	NO INFO														Spellcaster- W11	18.4	0.1
Double Dream Preroll- W26	17.1	NO INFO														PLC Berry White 1470- W13a	18.4	NO INFO
LA Confidential- W29	17.13	0.1														PLC Berry White 1471- W13a	18.4	NO INFO
Chocolate Chunk- W27	17.15	0														FF Dragon Berry 39PB- W13a	18.4	1.2
Gooberry by Artizen-W3a	17.2	NO INFO														Gooberry popcorn Artizen- w16b	18.4	NO INFO
CK Cinex HG- W11	17.2	0.7														LemonBerry Artizen- w16b	18.4	0.2
Cookie Wreck Shake- W11	17.2	0.1														Training Day Jackpot Seaweed- w16b	18.4	NO INFO
Dutch Treat- W11	17.2	0.9														Klingon 0.5G Preroll Soulshine- w16b	18.4	NO INFO
PLC White Fire Og 1452-W13a	17.2	NO INFO														Cherry OG Preroll- W31	18.4	0.2
PLC Wifi FI OG 1453-W13a	17.2	NO INFO														Grape Preroll- W13b	18.4	NO INFO
God's Gift Bong Buddies- W15	17.2	0.2														Alien Blackberry (preroll)- W13b	18.4	NO INFO
LA Soda Pre Roll 1g WeedBush- w16b	17.2	NO INFO														Nurse Joy- W38	18.4	NO INFO
Orange Rush .75g pre-roll Hempkings- w16b	17.2	NO INFO														Cinex- W27	18.43	0
CBD Lilly- W27	17.2	0														GG- W27	18.43	0
Snowdawg- W27	17.2	0														Green Crack by Emerald Evolution-W3a	18.5	0.2
Cookies and Cream- W27	17.2	2.4														Green Crack Trim by Emerald Evolution-W3a	18.5	0.2
Blue Dream by Artizen-W3a	17.3	0.2														Sour Diesel by Artizen-W3a	18.5	0.6
Blue Dream Popcorn Buds by Artizen-W3a	17.3	0.2														DJ Short Blueberry Budlet Flower by Dama-W3a	18.5	NO INFO
Lemon Kush- W8a	17.3	0.2														Illumidodi by SPP -W3a	18.5	0.3
Empire Colombian Gold XZZI- W13a	17.3	NO INFO														Shangri-La by Badass Grass-W3a	18.5	NO INFO
707 Headband Seattle's Private Reserve- w16b	17.3	NO INFO														Tangerine Dream- W8a	18.5	0.2
G13 Popcorn Artizen- w16b	17.3	NO INFO														UK Cheese- W8a	18.5	No INFO
Bubbleberry 1g. Pre-roll Top shelf- w16b	17.3	No INFO														Empire Nector Haze XZZE- W13a	18.5	NO INFO
Velvet Pie Preroll 1g Libery Reach- w16b	17.3	NO INFO														Empire Nector Haze Y00D- W13a	18.5	NO INFO
Sunset Sherbet- W26	17.3	NO INFO														Golden Pineapple Bong Buddies- W15	18.5	0.3
Gabriel Gummo- W31	17.3	0.2														Grand Hindu Burnwell-w16b	18.5	0.3
Fruity Pebbles- W8a	17.4	0.8														Cheese Quake by Dynamic Harvest- W19a	18.5	NO INFO
Tahoe OG- W8a	17.4	NO INFO														Double OG Sour Diesel Joint by Phata Panda (Preroll)- W19a	18.5	NO INFO
Jack Herer- W15	17.4	0.2														E E Sour Bubba Shake- W31	18.5	NO INFO
Cherry OG #2 Viva- w16b	17.4	NO INFO														Ewok- W13b	18.5	NO INFO
Husky Kush Cannaman- w16b	17.4	0.4														Royal Kush Preroll- W13b	18.5	NO INFO
Ace of Spades 1g. Pre roll Forte Farms- w16b	17.4	NO INFO														Grape Kush Preroll- W13b	18.5	NO INFO
Dosi Pie PreRoll 1g Liberty Reach- w16b	17.4	No INFO														Blue Cheese- W11	18.55	0.6
Space Wrangler Og- W26	17.4	1														EV Blueberry Diesel by Evolved -W3a	18.6	NO INFO
GP BLK MNT x JOG- W13b	17.4	NO INFO														First 48 by Dawg Star -W3a	18.6	0.2
Mendo Breath Preroll- W29	17.45	0														Silver Surfer by Soulshine Cannabis-W3a	18.6	NO INFO
Royal Quen- W27	17.49	0														The Pineapple Popcorn Buds by Artizen-W3a	18.6	0.4
Romulan by Soulshine Cannabis -W3a	17.5	0.3														Fire OG by Artizen-W3a	18.6	NO INFO
The Pineapple by Artizen-W3a	17.5	0.6														Fire Alien Romulan- W5	18.6	NO INFO
Sour Grape Liberty Reach -w16b	17.5	0														White Label Pineapple- W8a	18.6	1
GG4 by Doc & Crook (Preroll)- W19a	17.5	NO INFO														Bubbleberry- W8a	18.6	NO INFO
Royal Kush- W13b	17.5	1														Thai Berry- W8a	18.6	0.3
Carl Sagan- W10	17.57	NO INFO														EHF Maui Wowie 15SN- W13a	18.6	NO INFO
Island Lavender by Western Cultured-W3a	17.6	0.3														Chocolate Chunk- W15	18.6	0.3
Blue Bird Small Bud by Emerald Evolution -W3a	17.6	NO INFO														Blue Dream Liberty Reach- w16b	18.6	NO INFO
Harlequin- W8a	17.6	11.5														Bob Barker Liberty Reach- w16b	18.6	NO INFO
Super Lemon Haze- W8a	17.6	NO INFO														Dr. Who Clandestine- w16b	18.6	NO INFO
Casey Quantum Buddha- w16b	17.6	0.2														Granola Funk Jackpot Seaweed-w16b	18.6	NO INFO
Pineapple Chunk ABC Farms- w16b	17.6	NO INFO														Passio Fruit Lifted- w16b	18.6	NO INFO
Jack of Spades Pre-Roll 1.2g Lazy Bee- w16b	17.6	NO INFO														Sour Diesel Hilltop- w16b	18.6	NO INFO
Tangie- W26	17.6	0.5														Velvet Pie Jackpot Seaweed- w16b	18.6	No INFO
Mango Kush by Dogtown Pioneers-W3a	17.7	0.2														Mendo Breath Cig Tin 3g Liberty Reach- w16b	18.6	No INFO
Obama by Heavenly Buds-W3a	17.7	NO INFO														Tangerne Dream Trim- W27	18.6	0
OG Kush Budlet Flower by Dama-W3a	17.7	0.5														Tillamook Strawberry Preroll- W27	18.6	0
Blue Dot Alien- W8a	17.7	0.2														E E Sour Bubba- W31	18.6	NO INFO
Spark OG- W11	17.7	0.1														Freedom Baby- W13b	18.6	NO INFO
Platinum Super Glue High Tide- w16b	17.7	NO INFO														Love Potion- W13b	18.6	NO INFO
The White 1g Pre Roll Emerald Fields- w16b	17.7	1.8														Head Cheese- W13b	18.6	NO INFO
Freemont Troll- W26	17.7	0.3														Dutch Berry (Popcorn)- W38	18.6	NO INFO
Key Lime Pie- W26	17.7	NO INFO														Fruity Pebbles- W10	18.69	NO INFO
Promo Blue Cookies- W26	17.7	NO INFO														Dirty Girl by Xclusive-W3a	18.7	2.6
Allen Wrench- W38	17.7	NO INFO														Gorilla Glue #4 Shake by Hempkings-W3a	18.7	NO INFO
Maui Wowie by Weedy's-W3a	17.8	NO INFO														Lemonberry by Artizen-W3a	18.7	12.1
Grape Ape by El Ella-W3a	17.8	NO INFO														Dutchberry by Artizen-W3a	18.7	NO INFO
Blue Bird Trim by Emerald Evolution-W3a	17.8	NO INFO														Blackberry Kush- W8a	18.7	NO INFO
LSD by Xclusive-W3a	17.8	NO INFO														Cascade Cookies- W8a	18.7	NO INFO
Blackberry Kush- W8a	17.8	NO INFO														Kush Wreck- W8a	18.7	0.2
Grape Ape - W8a	17.8	NO INFO														OMG Lavender E7FT- W13a	18.7	NO INFO
Pitbull - W8a	17.8	0.2														NWCS PR Pink Cookies 8415- W13a	18.7	1.1
Blue Steel- W8a	17.8	NO INFO														Blueberry Diesel C&D- w16b	18.7	NO INFO
Raspberry Kush Premium- W11	17.8	0.2														Chernobyl Fire- w16b	18.7	1.5
Green Freedom White Urkle 9UOG- W13a	17.8	0.4														NYC Diesel Fire- w16b	18.7	0.2
Dr. Who- W15	17.8	NO INFO														Jillybean1g Pre-roll High Five Farms- w16b	18.7	0.3
Blueberry Durban Monkey Grass- w16b	17.8	NO INFO														NY Purple Diesel 1g. Pre-roll Forte Farms- w16b	18.7	0.2
Curts GSC Rochester- w16b	17.8	NO INFO														UW Pre-Roll 1g. Cannaman Farms- w16b	18.7	NO INFO
Champagne PreRoll 2x.05 Sticky Budz- w16b	17.8	0.2														Promo Sour Patch- W26	18.7	NO INFO
CPK 1g Pre Roll Emerald Fields- w16b	17.8	1.9														Purps- W27	18.7	0
Green Zkittlez Joint by Slab Mechanix/ Agro Mechaniz (Preroll)- W19a	17.8	NO INFO														Gabriel Orange Bubble Gum-W31	18.7	No INFO
Pineapple Dream Preroll- W27	17.8	0														Espresso- W13b	18.7	NO INFO
Allen Wrench Preroll- W31	17.8	0.3														Pink Lemonade (preroll)- W13b	18.7	NO INFO
Blue Bird- W13b	17.8	NO INFO														Birthday Cake Kush- W29	18.79	0.02
Sensi Star by Dama-W3a	17.9	NO INFO														Grapefruit Preroll- W29	18.79	0
Space Goo Popcorn Buds by Artizen-W3a	17.9	NO INFO														Sour Diesel Popcorn Buds by Artizen-W3a	18.8	0.6
Sofa King Kush- W8a	17.9	NO INFO														Super Lemon Haze by Heavenly Buds-W3a	18.8	NO INFO
Blue City Diesel- W8a	17.9	NO INFO														Critical Purple Kush by WEED-W3a	18.8	NO INFO
Select Blue City Diesel- W8a	17.9	NO INFO														Hindu Kush by Soulshine Cannabis-W3a	18.8	0.2
PLC Animal Cookies 1466- W13a	17.9	5.8														Lavender by Dogtown Pioneers-W3a	18.8	0.2
PLC Animal Cookies 1467-W13a	17.9	5.8														Blueberry Silvertip by Pioneer Nuggets-W3a	18.8	1
Blue Dream- w16b	17.9	NO INFO														Purple Berry- W8a	18.8	1.2
Jahmba Juice High Tide- w16b	17.9	NO INFO														UW - W8a	18.8	NO INFO
Pineapple Express ABC - w16b	17.9	1														Peach Dream- W8a	18.8	NO INFO
Tangerine Dream Buddha- w16b	17.9	NO INFO														Black Cherry Soda Lazy Bee- w16b	18.8	NO INFO
Allen Wrench 1g Pre- Roll Cut Above- w16b	17.9	0.6														Grand Daddy Purple Clandestine- w16b	18.8	NO INFO
Lemon Berry Pre-Roll Artizen- w16b	17.9	0.3														Jack Herer Buddha- w16b	18.8	NO INFO
Og X Cannalope Haze 1.1g pre-roll High Five Farms- w16b	17.9	0.2														Sweet Cheese Root Down- w16b	18.8	0.6
Citrus Kiss- W26	17.9	0.2														Romulan .5g Pre-Roll Soulshine- w16b	18.8	NO INFO
Kandy Kush- W26	17.9	0.3														Headband by Doc & Crook (Preroll)- W19a	18.8	No INFO
Tiramisu Preroll- W27	17.9	0														Frankenstein- W26	18.8	NO INFO
Sky High Green Crack- W31	17.9	NO INFO														Black Bubba- W26	18.8	NO INFO
Blueberry- W29	17.96	0														Dutch Treat- W27	18.8	1.5
Treehawk OG- W10	17.97	NO INFO														Blueberry Preroll- W13b	18.8	NO INFO
Jack the Ripper by Heavenly Buds-W3a	18	0														Pineapple Preroll- W13b	18.8	NO INFO
The Pineapple by Artizen-W3a	18	0.4														Strawberry Pre-roll- W13b	18.8	NO INFO
Cherry Pie- W8a	18	NO INFO														18 OG Preroll- W13b	18.8	NO INFO
Kimbo Kush- W8a	18	NO INFO														Gooberry CL Bag- W38	18.8	NO INFO
Limesicle- W8a	18	0.9														Green Crack by Emerald Evolution-W3a	18.9	NO INFO
Orange Marmalade- W10	18	NO INFO														Bubbleberry by Emerald Evolution-W3a	18.9	NO INFO
Lemon Meringue- W10	18	NO INFO														Cookies and Cream by Emerald Evolution-W3a	18.9	NO INFO
OMG Hawaiian Punch E7FE- W13a	18	NO INFO														Cookies and Cream Smalls by Emerald Evolution-W3a	18.9	NO INFO
Agent Orange Gaga- w16b	18	NO INFO														Gorilla Glue #4 by Elevate Cannabis-W3a	18.9	NO INFO
Gorilla Glue Fire- w16b	18	0.2														Chocolate Thai- W8a	18.9	NO INFO
Mr. Nice Hilltop- w16b	18	NO INFO														Fifty Pinapples- W8a	18.9	0.6
XJ-13 Noble- w16b	18	NO INFO														Sinfully Sour- W8a	18.9	0.2
Green Crack Green Haven- W19a	18	NO INFO														Black Widow- W10	18.9	NO INFO
Buddha Tahoe by RJL- W19a	18	NO INFO														Mendo Breath GA- W11	18.9	0.4
Master Yoda by Heavenly Buds- W19a	18	NO INFO														Blue Dream Sticky Budz- w16b	18.9	NO INFO
Blue Dream by Doc & Crook (Preroll)- W19a	18	NO INFO														Blueberry Noble Farms- w16b	18.9	NO INFO
Golden Pineapple Join by Phat Panda (Preroll)- W19a	18	NO INFO														Death Star Emerald Fields- w16b	18.9	0.8
Guana Bana by Doc & Crook (Preroll)- W19a	18	NO INFO														Disco Ball Abc- w16b	18.9	0.8
KushJoint by Slab Mechaniz/ Agro Mechaniz (Preroll)- W19a	18	NO INFO														Green Crack And Kief 1g Pre-roll High Five Farms- w16b	18.9	1
Lemon Sour Diesel by Doc & Crook (Preroll)- W19a	18	NO INFO														Lemon Sour Diesel Joint by Doc & Crook (Preroll)- W19a	18.9	NO INFO
Pink Champagne by Doc & Crook (Preroll)- W19a	18	NO INFO														THC Snow- W13b	18.9	NO INFO
Wonder Woman Popcon nugs- W27	18	0														Bubbleberry- W13b	18.9	NO INFO
Wonder Woman Trim- W27	18	0														Dr. Who- W38	18.9	0.6
Hawaiian Punch- W13b	18	NO INFO														Mountain Grown Kush- W10	18.95	NO INFO
Cookies and Cream- W13b	18	0.2														Alien Fruity Pebbles- W27	18.98	0
Strawberry Cough (preroll)- W13b	18	NO INFO														Maui Wowie by Xclusive-W3a	19	0.3
Pinepple Express- W10	18.01	0														Maui Wowie by Xclusive-W3a	19	0.3
Cookie Wreck- Shake- W11	18.05	0.1														Lemon Firecracker by Badass Grass-W3a	19	NO INFO
Mendo Breath- W29	18.07	0														Blue Dream by Western Cultured -W3a	19	0.4
Green Supreme Budlets by Hempkings-W3a	18.1	0.2														Blue Dream Popcorn Buds by Artizen-W3a	19	NO INFO
Paris OG Budlets by Hempkings-W3a	18.1	NO INFO														Gummo- W8a	19	NO INFO
Head Cheese Smalls by Emerald Evolution-W3a	18.1	0.2														Pineapple- W8a	19	0.8
9# Hammer- W5	18.1	NO INFO														Space Queen- W8a	19	NO INFO
Doc Croc Sugar BLK Rose 3437- W13a	18.1	NO INFO														FF Maui Wowie 39JB- W13a	19	0.5
Doc Croc Sugar BLK Rose 3438- W13a	18.1	NO INFO														Granddaddy Purple Clandestine- w16b	19	NO INFO
TS Dubshot Pineapple Express 9953-W13a	18.1	0.9														Sour Diesel Hilltop Growers- w16b	19	NO INFO
TS Dutch Treat 9946-W13a	18.1	1														Mendo Breath Pre-Roll .5g Liberty Reach- w16b	19	No INFO
TS Pineapple Express 9952-W13a	18.1	0.9														Super Glue 1g Pre Roll Emerald Fields- w16b	19	1.6
TS Pineapple Express 9954-W13a	18.1	0.9														Green Crack by Rochester Farms- W19a	19	NO INFO
Black Cherry Soda Pre Roll- W15	18.1	NO INFO														Narnia by Soulshine Cannabis- W19a	19	NO INFO
Firewalker OG Buddha- w16b	18.1	0.2														Super Sour Diesel by Soulshine Cannabis- W19a	19	NO INFO
Jack Herer Popcorn Red Frog- w16b	18.1	NO INFO														Blackberry Kush by Raven Grass- 19a	19	No INFO
Jack Herer Red Frog- w16b	18.1	NO INFO														Himalayan Blackberry by Soulshine Cannabis- W19a	19	NO INFO
Agent Orange Preroll Pack 3g. Solstice Pro- w16b	18.1	NO INFO														Pink Lemonade by Luv8- W19a	19	NO INFO
Hash Plant Tangerine Terp Stix 1g. Evergreen- w16b	18.1	0.2														Blue Dream by Doc & Crook (Preroll)- W19a	19	NO INFO
Deep Purple- W26	18.1	0.2														Animal Cookies- W26	19	NO INFO
Fireline Minto Chocolate Chip- W31	18.1	NO INFO														Pure Power Plant Popcorn Nugs- W27	19	0
Plushberry by SPP -W3a	18.2	0.2														Pure Power Plant Trim- W27	19	0
Blue Dream by Artizen-W3a	18.2	0.2														Platinum GSC- W27	19	0
Dragon Crack by El Ella-W3a	18.2	0.4														Gabriel Cookies & Cream- W31	19	NO INFO
SG Bruce Banner by Sun Grown-W3a	18.2	NO INFO														Kush Wreck -'s Pounder- W13b	19	0.2
Skunk #1- W8a	18.2	NO INFO														Connoisseurs Black Cherry Soda- W13b	19	NO INFO
Phat Panda- Purple Panda Reserve- W11	18.2	0.1														Cherry Pie- W13b	19	NO INFO
Skunk #1- W11	18.2	0.1														Lacubana- Blackberry (preroll)- W13b	19	NO INFO
FF Presiential OG 39DU- W13a	18.2	0.2														Lacubana- Blueberry (preroll)- W13b	19	NO INFO
Glazed Cherries- W15	18.2	NO INFO														Lacubana- Grape (preroll)- W13b	19	NO INFO
Bubblegum Emerald Fields- w16b	18.2	1.4														Lacbana- Peach (preroll)- W13b	19	NO INFO
G13 Buddha- w16b	18.2	0.2														Lacubana- Plain (preroll)- W13b	19	NO INFO
Quantum Kush Freedom- w16b	18.2	0.4														Lacubana- Strawberry (preroll)- W13b	19	NO INFO
Strawberry Crème 1g. Pre-roll Landrace-w16b	18.2	NO INFO														Seattle Cough Shake- W11	19.05	0.1
Face Melt Preroll- W29	18.2	0.1														Allen Wrench by Artizen-W3a	19.1	NO INFO
Clandestine Kosher Kush- W31	18.2	No INFO														Sour Diesel by Artizen-W3a	19.1	0.7
Dutc Treat- W29	18.22	0														Black Cherry Soda by Pioneer Nuggets-W3a	19.1	0.8
EV Satsuma by Evolved-W3a	18.3	NO INFO														Blue Bird by Emerald Evolution-W3a	19.1	NO INFO
Dutchberry Popcorn Buds by Artizen-W3a	18.3	0.3														Espresso Trim by Emerald Evolution-W3a	19.1	0.2
Moby Dick- W8a	18.3	NO INFO														Gorilla Glue #4 by Emerald Evolution-W3a	19.1	NO INFO
Critical Purple Kush- W8a	18.3	NO INFO														Gorilla Glue #4 Smalls by Emerald Evolution-W3a	19.1	NO INFO
BMF Training Day 0436- W13a	18.3	NO INFO														Root Beer Float Trim by Emerald Evolution-W3a	19.1	0.5
Matanuska - W15	18.3	NO INFO														Sunset Sherbert- W5	19.1	NO INFO
Dutch Treat Hilltop Growers- w16b	18.3	NO INFO														Sunset Sherbert Doobie- W5	19.1	NO INFO
Rude Boi og Forte Farms- w16b	18.3	0.4														Cookies and Cream GA- W11	19.1	0.5
Aloha 0.5g Preroll Soulshine- w16b	18.3	NO INFO														Mendo Purple Kush- W11	19.1	0.1
Snowdizzle- W13b	18.3	NO INFO														TS Dubshot Purple Champagne 5302- W13a	19.1	0.9
Sour Tangie- W27	18.39	0														TS Purple Champagne 5301- W13a	19.1	0.9
Platinum Kush by Mother Nature's Own-W3a	18.4	NO INFO														TS Purple Champagne 5303- W13a	19.1	0.9
Agent Orange by Moani-W3a	18.4	NO INFO														Gooberry Artizen- w16b	19.1	NO INFO
EV Spruce Lee by Evolved -W3a	18.4	NO INFO														Clementine by Doctor and Crook- W19a	19.1	NO INFO
Alien Rift by Emerald Evolution-W3a	18.4	0.2														Maui Wowie Bleezy by Forbidden Farms (Preroll)- W19a	19.1	NO INFO
Quantum Leap Popcorn Buds by Artizen-W3a	18.4	0.3														Urban Poison- Popcorn Nug- W27	19.1	0
Solace Dobie- W5	18.4	NO INFO														Urban Poison- Trim- W27	19.1	0
Spellcaster- W11	18.4	0.1														Nightmare Cookies- W27	19.19	0
PLC Berry White 1470- W13a	18.4	NO INFO														Tangerine Dream- W27	19.19	1.31
PLC Berry White 1471- W13a	18.4	NO INFO														Blackberry Stomper by Emerald Evolution-W3a	19.2	NO INFO
FF Dragon Berry 39PB- W13a	18.4	1.2														Blackberry Stomper Trim by Emerald Evolution-W3a	19.2	NO INFO
Gooberry popcorn Artizen- w16b	18.4	NO INFO														Ev Marion Berry Kush by Evolved-W3a	19.2	NO INFO
LemonBerry Artizen- w16b	18.4	0.2														Blue Dream- W8a	19.2	NO INFO
Training Day Jackpot Seaweed- w16b	18.4	NO INFO														FF Presidential Kush OAER- W13a	19.2	0.6
Klingon 0.5G Preroll Soulshine- w16b	18.4	NO INFO														GOF BB Panda Glue 9801- W13a	19.2	0.2
Cherry OG Preroll- W31	18.4	0.2														TS Pineapple Express 5463-W13a	19.2	1.3
Grape Preroll- W13b	18.4	NO INFO														Blue Magoo Cannaman Farms- w16b	19.2	NO INFO
Alien Blackberry (preroll)- W13b	18.4	NO INFO														Strawberry lemonade Cannaman- w16b	19.2	NO INFO
Nurse Joy- W38	18.4	NO INFO														Sugar Mama Elements- w16b	19.2	No INFO
Cinex- W27	18.43	0														Granola Funk Infused Pre-Roll 1g Liberty Reach - w16b	19.2	NO INFO
GG- W27	18.43	0														Critical Sensei Star Preroll- W26	19.2	1.3
Green Crack by Emerald Evolution-W3a	18.5	0.2														Grand Hindu- W38	19.2	NO INFO
Green Crack Trim by Emerald Evolution-W3a	18.5	0.2														Arcata Trainwreck by Rainier Acres- W19a	19.22	NO INFO
Sour Diesel by Artizen-W3a	18.5	0.6														Blue Hawaiian - W10	19.24	NO INFO
DJ Short Blueberry Budlet Flower by Dama-W3a	18.5	NO INFO														Island Lavender- W29	19.25	0.02
Illumidodi by SPP -W3a	18.5	0.3														Bubble Bomb by Heavenly Buds-W3a	19.3	0.3
Shangri-La by Badass Grass-W3a	18.5	NO INFO														Raspberry Kush by Heavenly Buds-W3a	19.3	NO INFO
Tangerine Dream- W8a	18.5	0.2														Pepe's Papaya Popcorn Buds by Artizen-W3a	19.3	NO INFO
UK Cheese- W8a	18.5	No INFO														Space Queen Popcorn Buds by Artizen-W3a	19.3	0.3
Empire Nector Haze XZZE- W13a	18.5	NO INFO														Hoggs Brath- W8a	19.3	NO INFO
Empire Nector Haze Y00D- W13a	18.5	NO INFO														Orange Rush- W8a	19.3	NO INFO
Golden Pineapple Bong Buddies- W15	18.5	0.3														Bubblicious- W10	19.3	NO INFO
Grand Hindu Burnwell-w16b	18.5	0.3														Fruity pebbles- W10	19.3	NO INFO
Cheese Quake by Dynamic Harvest- W19a	18.5	NO INFO														TS Blackberry Kush 6840- W13a	19.3	0.2
Double OG Sour Diesel Joint by Phata Panda (Preroll)- W19a	18.5	NO INFO														Big Purple Fire- w16b	19.3	0.2
E E Sour Bubba Shake- W31	18.5	NO INFO														Black Magic High Altitude- w16b	19.3	NO INFO
Ewok- W13b	18.5	NO INFO														Cannaman Coffee Cannaman- w16b	19.3	NO INFO
Royal Kush Preroll- W13b	18.5	NO INFO														GameChanger Trim Hempkings- w16b	19.3	0.2
Grape Kush Preroll- W13b	18.5	NO INFO														Grape Ape Popcorn Artizen-w16b	19.3	NO INFO
Blue Cheese- W11	18.55	0.6														Green Crack Rochester Farms- w16b	19.3	0.2
EV Blueberry Diesel by Evolved -W3a	18.6	NO INFO														The Pineapple Artizen- w16b	19.3	0.6
First 48 by Dawg Star -W3a	18.6	0.2														Blue Steele Preroll 1g Liberty Reach- w16b	19.3	NO INFO
Silver Surfer by Soulshine Cannabis-W3a	18.6	NO INFO														Lodi Dodi .5G Preroll Soulshine-w16b	19.3	No INFO
The Pineapple Popcorn Buds by Artizen-W3a	18.6	0.4														Cheddarhead- W13b	19.3	NO INFO
Fire OG by Artizen-W3a	18.6	NO INFO														Blueberry Cookies- W38	19.3	NO INFO
Fire Alien Romulan- W5	18.6	NO INFO														Allen Wrench by El Ella-W3a	19.37	NO INFO
White Label Pineapple- W8a	18.6	1														AK-47- W27	19.38	0
Bubbleberry- W8a	18.6	NO INFO														Himalayan Blackberry by Soulshine Cannabis-W3a	19.4	No INFO
Thai Berry- W8a	18.6	0.3														Grape Ape Popcorn Buds by Artizen-W3a	19.4	NO INFO
EHF Maui Wowie 15SN- W13a	18.6	NO INFO														Pink Panther Budlet Flower by Dama-W3a	19.4	0.5
Chocolate Chunk- W15	18.6	0.3														Sour Diesel- W8a	19.4	0.2
Blue Dream Liberty Reach- w16b	18.6	NO INFO														Purple Champagne- W8a	19.4	0.2
Bob Barker Liberty Reach- w16b	18.6	NO INFO														Snowland- W8a	19.4	NO INFO
Dr. Who Clandestine- w16b	18.6	NO INFO														Chocolate Dream- W15	19.4	0.4
Granola Funk Jackpot Seaweed-w16b	18.6	NO INFO														Sour Diesel- W15	19.4	NO INFO
Passio Fruit Lifted- w16b	18.6	NO INFO														Ultrex Freedom- w16b	19.4	1.9
Sour Diesel Hilltop- w16b	18.6	NO INFO														Cookies n' Cream 1g Pre Roll Emerald Fiels- w16b	19.4	1.4
Velvet Pie Jackpot Seaweed- w16b	18.6	No INFO														CPK 1g Pre-Roll Cut Above- w16b	19.4	0.5
Mendo Breath Cig Tin 3g Liberty Reach- w16b	18.6	No INFO														Vietnam Kashmiri- W26	19.4	1.1
Tangerne Dream Trim- W27	18.6	0														Tavo Preroll- W26	19.4	NO INFO
Tillamook Strawberry Preroll- W27	18.6	0														Urban Poison- W27	19.4	0.01
E E Sour Bubba- W31	18.6	NO INFO														Trail Blazin 9# Hammer- W31	19.4	NO INFO
Freedom Baby- W13b	18.6	NO INFO														Blue Alien Preroll- W31	19.4	NO INFO
Love Potion- W13b	18.6	NO INFO														Chocolate Kush- W13b	19.4	0.7
Head Cheese- W13b	18.6	NO INFO														GG- W13b	19.4	0.4
Dutch Berry (Popcorn)- W38	18.6	NO INFO														Plain Preroll- W13b	19.4	NO INFO
Fruity Pebbles- W10	18.69	NO INFO														Dutchberry by Artizen- W19a	19.48	No INFO
Dirty Girl by Xclusive-W3a	18.7	2.6														Shaved Ice Preroll- W29	19.49	0
Gorilla Glue #4 Shake by Hempkings-W3a	18.7	NO INFO														DJ Short Blueberry Budlet Flower by Dama-W3a	19.5	NO INFO
Lemonberry by Artizen-W3a	18.7	12.1														Lemon Larry by Heavenly Buds-W3a	19.5	NO INFO
Dutchberry by Artizen-W3a	18.7	NO INFO														The Pineapple Popcorn Buds by Artizen-W3a	19.5	NO INFO
Blackberry Kush- W8a	18.7	NO INFO														EWOK by SPP-W3a	19.5	NO INFO
Cascade Cookies- W8a	18.7	NO INFO														Jack Diesel- W5	19.5	NO INFO
Kush Wreck- W8a	18.7	0.2														Clementine- W8a	19.5	NO INFO
OMG Lavender E7FT- W13a	18.7	NO INFO														OGKB V2.1- W8a	19.5	NO INFO
NWCS PR Pink Cookies 8415- W13a	18.7	1.1														Blueberry Diesel- W8a	19.5	0.2
Blueberry Diesel C&D- w16b	18.7	NO INFO														Klementine Kush- W8a	19.5	NO INFO
Chernobyl Fire- w16b	18.7	1.5														Firecracker - W15	19.5	NO INFO
NYC Diesel Fire- w16b	18.7	0.2														G13- W15	19.5	0.2
Jillybean1g Pre-roll High Five Farms- w16b	18.7	0.3														Dawg Walker Buddha- w16b	19.5	0.3
NY Purple Diesel 1g. Pre-roll Forte Farms- w16b	18.7	0.2														Day Tripper GaGa- w16b	19.5	0.3
UW Pre-Roll 1g. Cannaman Farms- w16b	18.7	NO INFO														Lambs Bread Sour Diesel Trim Hempkings- w16b	19.5	NO INFO
Promo Sour Patch- W26	18.7	NO INFO														Northern Lights Haze Suncliff- w16b	19.5	NO INFO
Purps- W27	18.7	0														Pbb X Sss Weedbush- w16b	19.5	NO INFO
Gabriel Orange Bubble Gum-W31	18.7	No INFO														Pepe's Papaya Popcorn Artizen -w16b	19.5	0.3
Espresso- W13b	18.7	NO INFO														Snoop's Dream Agro Mechanix- w16b	19.5	NO INFO
Pink Lemonade (preroll)- W13b	18.7	NO INFO														Cannaman Coffee Pre-Roll 1g Cannaman Farms- w16b	19.5	0.2
Birthday Cake Kush- W29	18.79	0.02														OGKB V2.1 Preroll 1g Liberty Reach- w16b	19.5	NO INFO
Grapefruit Preroll- W29	18.79	0														ATF by Green 420- W19a	19.5	NO INFO
Sour Diesel Popcorn Buds by Artizen-W3a	18.8	0.6														Cannalope Kush by Black Label Bud- W19a	19.5	No INFO
Super Lemon Haze by Heavenly Buds-W3a	18.8	NO INFO														Cowlitz Gold GDP- W31	19.5	NO INFO
Critical Purple Kush by WEED-W3a	18.8	NO INFO														Mint Chocolate Chip Preroll- W31	19.5	NO INFO
Hindu Kush by Soulshine Cannabis-W3a	18.8	0.2														GG- W13b	19.5	0.2
Lavender by Dogtown Pioneers-W3a	18.8	0.2														MCC3.5G Budlets- W13b	19.5	NO INFO
Blueberry Silvertip by Pioneer Nuggets-W3a	18.8	1														Grape Ape- W38	19.5	NO INFO
Purple Berry- W8a	18.8	1.2														Strawberry Banana Freya Smalls- W38	19.5	NO INFO
UW - W8a	18.8	NO INFO														Gooberry by Artizen- W19a	19.56	NO INFO
Peach Dream- W8a	18.8	NO INFO														Blackberry Kush by Dawg Star-W3a	19.6	NO INFO
Black Cherry Soda Lazy Bee- w16b	18.8	NO INFO														Day Tripper Smalls by Black Label Cannabis-W3a	19.6	NO INFO
Grand Daddy Purple Clandestine- w16b	18.8	NO INFO														Ev Pugs Breath by Evolved-W3a	19.6	NO INFO
Jack Herer Buddha- w16b	18.8	NO INFO														Quantum Leap by Artizen-W3a	19.6	NO INFO
Sweet Cheese Root Down- w16b	18.8	0.6														XJ-13- W8a	19.6	NO INFO
Romulan .5g Pre-Roll Soulshine- w16b	18.8	NO INFO														Blackwater- W8a	19.6	0.2
Headband by Doc & Crook (Preroll)- W19a	18.8	No INFO														Kush Wreck- W8a	19.6	0.5
Frankenstein- W26	18.8	NO INFO														Sasquatch Breath- W8a	19.6	0.2
Black Bubba- W26	18.8	NO INFO														Jack Frost- W11	19.6	0.2
Dutch Treat- W27	18.8	1.5														BMF Training Day 0435- W13a	19.6	NO INFO
Blueberry Preroll- W13b	18.8	NO INFO														OMG Lavender LZBU- W13a	19.6	NO INFO
Pineapple Preroll- W13b	18.8	NO INFO														FF Presidential Kush APRW- W13a	19.6	0.3
Strawberry Pre-roll- W13b	18.8	NO INFO														FF Presidential Kush APTJ- W13a	19.6	0.3
18 OG Preroll- W13b	18.8	NO INFO														Blue Dream Artizen- w16b	19.6	0.2
Gooberry CL Bag- W38	18.8	NO INFO														Grape Ape Hilltop- w16b	19.6	NO INFO
Green Crack by Emerald Evolution-W3a	18.9	NO INFO														Grape God Buddha- w16b	19.6	NO INFO
Bubbleberry by Emerald Evolution-W3a	18.9	NO INFO														Lemonberry Popcorn Artizen- w16b	19.6	0.3
Cookies and Cream by Emerald Evolution-W3a	18.9	NO INFO														Super Lemon Haze Root Down - w16b	19.6	NO INFO
Cookies and Cream Smalls by Emerald Evolution-W3a	18.9	NO INFO														Tangie Power Forte- w16b	19.6	NO INFO
Gorilla Glue #4 by Elevate Cannabis-W3a	18.9	NO INFO														Chemdawg- W26	19.6	NO INFO
Chocolate Thai- W8a	18.9	NO INFO														Infused EWK Preroll- W26	19.6	0.7
Fifty Pinapples- W8a	18.9	0.6														Hawaiian Punch Preroll- W31	19.6	NO INFO
Sinfully Sour- W8a	18.9	0.2														Maui Wowie- W38	19.6	NO INFO
Black Widow- W10	18.9	NO INFO														Purple Panty Dropper Preroll- W29	19.62	0.05
Mendo Breath GA- W11	18.9	0.4														Sunset Sherbet by Exotikz- W19a	19.66	NO INFO
Blue Dream Sticky Budz- w16b	18.9	NO INFO														LA Cheese by Dogtown Pioneers-W3a	19.7	NO INFO
Blueberry Noble Farms- w16b	18.9	NO INFO														Sour Cookies by WEED-W3a	19.7	NO INFO
Death Star Emerald Fields- w16b	18.9	0.8														XJ-13- W11	19.7	0.1
Disco Ball Abc- w16b	18.9	0.8														WW Pineapple Express 1ANQ9-W13a	19.7	0.3
Green Crack And Kief 1g Pre-roll High Five Farms- w16b	18.9	1														Fire Lemon Kush Viva Cannabis- w16b	19.7	NO INFO
Lemon Sour Diesel Joint by Doc & Crook (Preroll)- W19a	18.9	NO INFO														Harambe C&D- w16b	19.7	NO INFO
THC Snow- W13b	18.9	NO INFO														Plane Wreck NW Pearl- w16b	19.7	NO INFO
Bubbleberry- W13b	18.9	NO INFO														Holy Trinity 1g Pre-Roll Cut Above- w16b	19.7	0.4
Dr. Who- W38	18.9	0.6														Mendo Breath Pre-Roll 1g Liberty Reach - w16b	19.7	No INFO
Mountain Grown Kush- W10	18.95	NO INFO														Lodi Dodi by Soulshine Cannabis- W19a	19.7	NO INFO
Alien Fruity Pebbles- W27	18.98	0														Double Dream- W26	19.7	NO INFO
Maui Wowie by Xclusive-W3a	19	0.3														Jagoo- W27	19.7	0
Maui Wowie by Xclusive-W3a	19	0.3														Grapefruit x NPH- W13b	19.7	NO INFO
Lemon Firecracker by Badass Grass-W3a	19	NO INFO														Strawberry Cough by Moani-W3a	19.8	NO INFO
Blue Dream by Western Cultured -W3a	19	0.4														Blackberry Kush by El Ella -W3a	19.8	NO INFO
Blue Dream Popcorn Buds by Artizen-W3a	19	NO INFO														Bubblicious by Heavenly Buds-W3a	19.8	NO INFO
Gummo- W8a	19	NO INFO														Lemonberry Popcorn Buds by Artizen -W3a	19.8	0.3
Pineapple- W8a	19	0.8														Chernobyl #4- W11	19.8	0.8
Space Queen- W8a	19	NO INFO														Kosher Kush- W11	19.8	0.1
FF Maui Wowie 39JB- W13a	19	0.5														Walden Ewok 7190-W13a	19.8	0.5
Granddaddy Purple Clandestine- w16b	19	NO INFO														Pineapple Chunk Forte Farms- w16b	19.8	NO INFO
Sour Diesel Hilltop Growers- w16b	19	NO INFO														Training Day Liberty Reach- w16b	19.8	NO INFO
Mendo Breath Pre-Roll .5g Liberty Reach- w16b	19	No INFO														The Pineapple .5g Pre-roll Artizen- w16b	19.8	NO INFO
Super Glue 1g Pre Roll Emerald Fields- w16b	19	1.6														9 lb Hammer- W26	19.8	0.5
Green Crack by Rochester Farms- W19a	19	NO INFO														Bubba Crack- W26	19.8	0.5
Narnia by Soulshine Cannabis- W19a	19	NO INFO														Loaded Pipe Bubba Crack- W26	19.8	0.5
Super Sour Diesel by Soulshine Cannabis- W19a	19	NO INFO														E E Blackberry Stomper Shake- W31	19.8	0.2
Blackberry Kush by Raven Grass- 19a	19	No INFO														Hindu K- W13b	19.8	NO INFO
Himalayan Blackberry by Soulshine Cannabis- W19a	19	NO INFO														Hinu K- W13b	19.8	NO INFO
Pink Lemonade by Luv8- W19a	19	NO INFO														Locktite- W13b	19.8	NO INFO
Blue Dream by Doc & Crook (Preroll)- W19a	19	NO INFO														Pineapple Expres- 28's Pounder-W13b	19.8	NO INFO
Animal Cookies- W26	19	NO INFO														Pineapple Express- Dubshot- W13b	19.8	NO INFO
Pure Power Plant Popcorn Nugs- W27	19	0														Kush Wreck -'s Pounder- W13b	19.8	0.5
Pure Power Plant Trim- W27	19	0														Locktite Preroll- W13b	19.8	NO INFO
Platinum GSC- W27	19	0														Fruity Pebbles- W38	19.8	NO INFO
Gabriel Cookies & Cream- W31	19	NO INFO														Jack Herer- W38	19.8	NO INFO
Kush Wreck -'s Pounder- W13b	19	0.2														Day & Night PreRoll GSC/ God's Gift- W38	19.8	NO INFO
Connoisseurs Black Cherry Soda- W13b	19	NO INFO														Gnub indica (preroll)- W38	19.8	0.2
Cherry Pie- W13b	19	NO INFO														Gstik Naturals Hybrid (preroll)- W38	19.8	NO INFO
Lacubana- Blackberry (preroll)- W13b	19	NO INFO														Northwest Pineapple- W10	19.84	NO INFO
Lacubana- Blueberry (preroll)- W13b	19	NO INFO														Sun Lounger by Mother Nature's Own-W3a	19.9	0.2
Lacubana- Grape (preroll)- W13b	19	NO INFO														Alien Skunk OG by Dawg Star-W3a	19.9	NO INFO
Lacbana- Peach (preroll)- W13b	19	NO INFO														XO Metal Haze- W5	19.9	NO INFO
Lacubana- Plain (preroll)- W13b	19	NO INFO														Pineapple Express- W8a	19.9	0.3
Lacubana- Strawberry (preroll)- W13b	19	NO INFO														Blue Dream Flower- W11	19.9	1.1
Seattle Cough Shake- W11	19.05	0.1														Carnival Kush- W11	19.9	0.1
Allen Wrench by Artizen-W3a	19.1	NO INFO														FF Dragon Berry AQRH- W13a	19.9	0.5
Sour Diesel by Artizen-W3a	19.1	0.7														FF Dragon Berry Aqul- W13a	19.9	0.5
Black Cherry Soda by Pioneer Nuggets-W3a	19.1	0.8														Gas Chamber Forte- w16b	19.9	NO INFO
Blue Bird by Emerald Evolution-W3a	19.1	NO INFO														God's Gift 1937 Farms- w16b	19.9	NO INFO
Espresso Trim by Emerald Evolution-W3a	19.1	0.2														Mendo Afgoo Top Shelf- w16b	19.9	NO INFO
Gorilla Glue #4 by Emerald Evolution-W3a	19.1	NO INFO														Mendo Breath Liberty Reach- w16b	19.9	NO INFO
Gorilla Glue #4 Smalls by Emerald Evolution-W3a	19.1	NO INFO														Orange Velvet Sonic Green- w16b	19.9	0.2
Root Beer Float Trim by Emerald Evolution-W3a	19.1	0.5														Star Dawg Popcorn Artizen- w16b	19.9	0.2
Sunset Sherbert- W5	19.1	NO INFO														LA Sour Diesel by U.S. Cannabis- W19a	19.9	No INFO
Sunset Sherbert Doobie- W5	19.1	NO INFO														Cherry Lemonade Preroll- W27	19.9	0
Cookies and Cream GA- W11	19.1	0.5														GDP Preroll- W13b	19.9	0.4
Mendo Purple Kush- W11	19.1	0.1														Chocolate Chunk- W38	19.9	NO INFO
TS Dubshot Purple Champagne 5302- W13a	19.1	0.9														Day & Night Green Crack/Blueberry- W38	19.9	NO INFO
TS Purple Champagne 5301- W13a	19.1	0.9														Himalayan Blackberry by Soulshine Cannabis-W3a	20	NO INFO
TS Purple Champagne 5303- W13a	19.1	0.9														White Cheddar by Dawg Star-W3a	20	NO INFO
Gooberry Artizen- w16b	19.1	NO INFO														White Cheddar Smallies by Dawg Star-W3a	20	NO INFO
Clementine by Doctor and Crook- W19a	19.1	NO INFO														Blue Dream by Xclusive-W3a	20	NO INFO
Maui Wowie Bleezy by Forbidden Farms (Preroll)- W19a	19.1	NO INFO														Guava by Mother Nature's Own-W3a	20	0.2
Urban Poison- Popcorn Nug- W27	19.1	0														Willy Wonka by Mother Nature's Own-W3a	20	0.2
Urban Poison- Trim- W27	19.1	0														Durban Poison- W8a	20	NO INFO
Nightmare Cookies- W27	19.19	0														Raspberry Kush- W8a	20	NO INFO
Tangerine Dream- W27	19.19	1.31														LA Soda- W8a	20	NO INFO
Blackberry Stomper by Emerald Evolution-W3a	19.2	NO INFO														Berry Kush- W10	20	NO INFO
Blackberry Stomper Trim by Emerald Evolution-W3a	19.2	NO INFO														Berry White Flower- W11	20	0.2
Ev Marion Berry Kush by Evolved-W3a	19.2	NO INFO														Empire Master Kush XZZ8- W13a	20	NO INFO
Blue Dream- W8a	19.2	NO INFO														Empire Master Kush Y00B- W13a	20	NO INFO
FF Presidential Kush OAER- W13a	19.2	0.6														Leaf Werx Soul Assassin UFGW- W13a	20	0.3
GOF BB Panda Glue 9801- W13a	19.2	0.2														Leaf Werx Soul Assassin UFJO- W13a	20	0.3
TS Pineapple Express 5463-W13a	19.2	1.3														Leaf Werx Soul Assassin UFLZ- W13a	20	3
Blue Magoo Cannaman Farms- w16b	19.2	NO INFO														WW Space Queen 1ANTL-W13a	20	NO INFO
Strawberry lemonade Cannaman- w16b	19.2	NO INFO														P-91 Bong Buddies- W15	20	0.3
Sugar Mama Elements- w16b	19.2	No INFO														Cookies N'Cream Lifted- w16b	20	NO INFO
Granola Funk Infused Pre-Roll 1g Liberty Reach - w16b	19.2	NO INFO														CPK Cut above- w16b	20	No INFO
Critical Sensei Star Preroll- W26	19.2	1.3														Dothraki Thunder Fuck Elements- w16b	20	0.9
Grand Hindu- W38	19.2	NO INFO														Mendo Breath Jackpot Seaweed- w16b	20	NO INFO
Arcata Trainwreck by Rainier Acres- W19a	19.22	NO INFO														Sour Amnesia- w16b	20	No INFO
Blue Hawaiian - W10	19.24	NO INFO														Sour Amnesia Forte- w16b	20	NO INFO
Island Lavender- W29	19.25	0.02														UW Cannaman- w16b	20	NO INFO
Bubble Bomb by Heavenly Buds-W3a	19.3	0.3														Cookie Monster x Mango Haze Joint 1g High Five Farms- w16b	20	No INFO
Raspberry Kush by Heavenly Buds-W3a	19.3	NO INFO														Kali Pre-Roll 1g Cannaman- w16b	20	NO INFO
Pepe's Papaya Popcorn Buds by Artizen-W3a	19.3	NO INFO														Super Lemon Haze by Kai'Dro- W19a	20	No INFO
Space Queen Popcorn Buds by Artizen-W3a	19.3	0.3														Tangie by 1937 Farms- W19a	20	NO INFO
Hoggs Brath- W8a	19.3	NO INFO														Black Cherry Soda by Kai'Drop- W19a	20	NO INFO
Orange Rush- W8a	19.3	NO INFO														Chem Valley Kush by Doctor and Crook- W19a	20	NO INFO
Bubblicious- W10	19.3	NO INFO														Cherry Sherbet by Nortwest Cannabis Solutions- W19a	20	No INFO
Fruity pebbles- W10	19.3	NO INFO														Ak-47 Oil Roll by U.S. Cannabis (Preroll)- W19a	20	NO INFO
TS Blackberry Kush 6840- W13a	19.3	0.2														Super Lemon Haze Blunt by Kai'Dro (Preroll)- W19a	20	NO INFO
Big Purple Fire- w16b	19.3	0.2														Whie Fire Alien OG by Raven Grass (Preroll)- W19a	20	NO INFO
Black Magic High Altitude- w16b	19.3	NO INFO														Super Silver Haze- W26	20	NO INFO
Cannaman Coffee Cannaman- w16b	19.3	NO INFO														Sugar Babies GG#4- W26	20	NO INFO
GameChanger Trim Hempkings- w16b	19.3	0.2														Dutch Trea #5- W29	20	1.2
Grape Ape Popcorn Artizen-w16b	19.3	NO INFO														GHT x Tangie- W13b	20	NO INFO
Green Crack Rochester Farms- w16b	19.3	0.2														Pineapple Super Silver Haze- W13b	20	NO INFO
The Pineapple Artizen- w16b	19.3	0.6														Star Fighter- W13b	20	NO INFO
Blue Steele Preroll 1g Liberty Reach- w16b	19.3	NO INFO														Face off- W13b	20	NO INFO
Lodi Dodi .5G Preroll Soulshine-w16b	19.3	No INFO														Blackberry Kush's- W13b	20	NO INFO
Cheddarhead- W13b	19.3	NO INFO														Pounder- BBK- W13b	20	NO INFO
Blueberry Cookies- W38	19.3	NO INFO														Blue Dream- W13b	20	NO INFO
Allen Wrench by El Ella-W3a	19.37	NO INFO														Jenny Kush- W13b	20	NO INFO
AK-47- W27	19.38	0														Connosoisseurs Lemon OG- W13b	20	0.2
Himalayan Blackberry by Soulshine Cannabis-W3a	19.4	No INFO														Orange Cookies- W13b	20	0.2
Grape Ape Popcorn Buds by Artizen-W3a	19.4	NO INFO														Blue Dream's- W13b	20	NO INFO
Pink Panther Budlet Flower by Dama-W3a	19.4	0.5														Bubbleberry- W13b	20	NO INFO
Sour Diesel- W8a	19.4	0.2														Purple Champagne- W38	20	0.4
Purple Champagne- W8a	19.4	0.2														Sun Berry- W38	20	NO INFO
Snowland- W8a	19.4	NO INFO														Loaded Pipe Pinapple Chunk- W26	20.08	0.6
Chocolate Dream- W15	19.4	0.4														Nor-Cal Blue- W27	20.09	0
Sour Diesel- W15	19.4	NO INFO														Big Black Indica by Moani-W3a	20.1	NO INFO
Ultrex Freedom- w16b	19.4	1.9														Blueberry by El Ella-W3a	20.1	NO INFO
Cookies n' Cream 1g Pre Roll Emerald Fiels- w16b	19.4	1.4														Gooberry by Artizen-W3a	20.1	No INFO
CPK 1g Pre-Roll Cut Above- w16b	19.4	0.5														Sour Patch Kiss Popcorn Buds by Artizen-W3a	20.1	0.3
Vietnam Kashmiri- W26	19.4	1.1														Fire OG Popcorn Buds by Artizen-W3a	20.1	NO INFO
Tavo Preroll- W26	19.4	NO INFO														Passion Fruit- W8a	20.1	NO INFO
Urban Poison- W27	19.4	0.01														Fruity Pebbles- W8a	20.1	NO INFO
Trail Blazin 9# Hammer- W31	19.4	NO INFO														Orange Skunk- W8a	20.1	0.2
Blue Alien Preroll- W31	19.4	NO INFO														Punky Lion Popcorn- W8a	20.1	NO INFO
Chocolate Kush- W13b	19.4	0.7														Skywalker OG- W8a	20.1	NO INFO
GG- W13b	19.4	0.4														Glooies- W10	20.1	0.1
Plain Preroll- W13b	19.4	NO INFO														Artizen the Pineapple VZRW- W13a	20.1	NO INFO
Dutchberry by Artizen- W19a	19.48	No INFO														Artizen The Pineapple VZW1- W13a	20.1	NO INFO
Shaved Ice Preroll- W29	19.49	0														FF XJ-13 1860- W13a	20.1	1.9
DJ Short Blueberry Budlet Flower by Dama-W3a	19.5	NO INFO														FF XJ-13 OB9B- W13a	20.1	1.9
Lemon Larry by Heavenly Buds-W3a	19.5	NO INFO														GOF Cenex 5251- W13a	20.1	0.4
The Pineapple Popcorn Buds by Artizen-W3a	19.5	NO INFO														GOF Cenex 5252- W13a	20.1	0.4
EWOK by SPP-W3a	19.5	NO INFO														GOF Cenex 5253- W13a	20.1	0.4
Jack Diesel- W5	19.5	NO INFO														GOF Dutch Treat 9790- W13a	20.1	1.3
Clementine- W8a	19.5	NO INFO														GOF Dutch Treat 9791- W13a	20.1	1.3
OGKB V2.1- W8a	19.5	NO INFO														Klingon Soulshine-w16b	20.1	NO INFO
Blueberry Diesel- W8a	19.5	0.2														Pink Lemonade Rochester- w16b	20.1	NO INFO
Klementine Kush- W8a	19.5	NO INFO														Purple Punch High Five Farms- w16b	20.1	NO INFO
Firecracker - W15	19.5	NO INFO														Quantum Leap Popcorn Artizen- w16b	20.1	NO INFO
G13- W15	19.5	0.2														Romulan NW Pearl- w16b	20.1	NO INFO
Dawg Walker Buddha- w16b	19.5	0.3														Sour Diesel Artizen- w16b	20.1	NO INFO
Day Tripper GaGa- w16b	19.5	0.3														Tangie 1937- w16b	20.1	No INFO
Lambs Bread Sour Diesel Trim Hempkings- w16b	19.5	NO INFO														Ghost Breath Pre-Roll 1g Liberty Reach- w16b	20.1	NO INFO
Northern Lights Haze Suncliff- w16b	19.5	NO INFO														Sour Sunset Sherbet .5g Pre-Roll Liberty Reach- w16b	20.1	NO INFO
Pbb X Sss Weedbush- w16b	19.5	NO INFO														Dread Bread- W26	20.1	NO INFO
Pepe's Papaya Popcorn Artizen -w16b	19.5	0.3														Flo- W26	20.1	0.2
Snoop's Dream Agro Mechanix- w16b	19.5	NO INFO														Maui Super Dawg- W26	20.1	NO INFO
Cannaman Coffee Pre-Roll 1g Cannaman Farms- w16b	19.5	0.2														Cowlitz Godl Dutch Treat- W31	20.1	NO INFO
OGKB V2.1 Preroll 1g Liberty Reach- w16b	19.5	NO INFO														Doc & Yeti Brandywine- W31	20.1	NO INFO
ATF by Green 420- W19a	19.5	NO INFO														Strawberry Switchblade- W13b	20.1	NO INFO
Cannalope Kush by Black Label Bud- W19a	19.5	No INFO														Dosidos- W13b	20.1	NO INFO
Cowlitz Gold GDP- W31	19.5	NO INFO														Goirlla Cookies- W13b	20.1	0.2
Mint Chocolate Chip Preroll- W31	19.5	NO INFO														Gooberry (popcorn)- W38	20.1	NO INFO
GG- W13b	19.5	0.2														Gooberry Popcorn Buds by Artizen-W3a	20.2	NO INFO
MCC3.5G Budlets- W13b	19.5	NO INFO														Purple Panty Dropper by Dawg Star-W3a	20.2	NO INFO
Grape Ape- W38	19.5	NO INFO														Raspberry Kush- W11	20.2	0
Strawberry Banana Freya Smalls- W38	19.5	NO INFO														EHF Snoops Dream 2297- W13a	20.2	NO INFO
Gooberry by Artizen- W19a	19.56	NO INFO														EHF Snoops Dream 2298- W13a	20.2	NO INFO
Blackberry Kush by Dawg Star-W3a	19.6	NO INFO														WB Alien Orange Cookies 1389-W13a	20.2	NO INFO
Day Tripper Smalls by Black Label Cannabis-W3a	19.6	NO INFO														Ak 47 Mellow- W15	20.2	NO INFO
Ev Pugs Breath by Evolved-W3a	19.6	NO INFO														Grease Monkey - W15	20.2	NO INFO
Quantum Leap by Artizen-W3a	19.6	NO INFO														CPK Cut Above-w16b	20.2	1.3
XJ-13- W8a	19.6	NO INFO														Game Changer Trim Hemp Kings- w16b	20.2	NO INFO
Blackwater- W8a	19.6	0.2														Game Changer Trim Hempkings- w16b	20.2	No INFO
Kush Wreck- W8a	19.6	0.5														Gamechanger Trim Hempkings- w16b	20.2	NO INFO
Sasquatch Breath- W8a	19.6	0.2														Green Dream Forte Farms- w16b	20.2	NO INFO
Jack Frost- W11	19.6	0.2														J-1 Popcorn Red Frog- w16b	20.2	NO INFO
BMF Training Day 0435- W13a	19.6	NO INFO														Jack Herer Popcorn- w16b	20.2	NO INFO
OMG Lavender LZBU- W13a	19.6	NO INFO														LA Confidential Artizen- w16b	20.2	NO INFO
FF Presidential Kush APRW- W13a	19.6	0.3														Cotnbrad Bubba v1 .5 preroll sitka	20.2	NO INFO
FF Presidential Kush APTJ- W13a	19.6	0.3														Memory Loss .5g Pre-roll Liberty Reach- w16b	20.2	No INFO
Blue Dream Artizen- w16b	19.6	0.2														Star Medicine .75g Hempkings- w16b	20.2	NO INFO
Grape Ape Hilltop- w16b	19.6	NO INFO														Face Off by Doc & Crook (Preroll)- W19a	20.2	NO INFO
Grape God Buddha- w16b	19.6	NO INFO														Firecracker by Phat Panda (Preroll)- W19a	20.2	NO INFO
Lemonberry Popcorn Artizen- w16b	19.6	0.3														Strawberry Shortcake- W26	20.2	NO INFO
Super Lemon Haze Root Down - w16b	19.6	NO INFO														Tres Dawg- W27	20.2	0
Tangie Power Forte- w16b	19.6	NO INFO														Sweet Cheese- W27	20.2	0
Chemdawg- W26	19.6	NO INFO														Tres Dawg- W27	20.2	0
Infused EWK Preroll- W26	19.6	0.7														G.G.- w13b	20.2	NO INFO
Hawaiian Punch Preroll- W31	19.6	NO INFO														Silky Johnson- W38	20.2	NO INFO
Maui Wowie- W38	19.6	NO INFO														Blue Dream- W29	20.24	0.09
Purple Panty Dropper Preroll- W29	19.62	0.05														Zensation- W11	20.25	0.1
Sunset Sherbet by Exotikz- W19a	19.66	NO INFO														Super Lemon Haze Mini Buds by Mini Budz-W3a	20.3	1.9
LA Cheese by Dogtown Pioneers-W3a	19.7	NO INFO														Blackberry Kush Shake by Hempkings-W3a	20.3	0.2
Sour Cookies by WEED-W3a	19.7	NO INFO														Chernobyl Budlet Flower by Dama-W3a	20.3	0.5
XJ-13- W11	19.7	0.1														Lemonberry Popcorn Buds by Artizen-W3a	20.3	0.2
WW Pineapple Express 1ANQ9-W13a	19.7	0.3														Sour Cookies by WEED -W3a	20.3	NO INFO
Fire Lemon Kush Viva Cannabis- w16b	19.7	NO INFO														Dutch Treat by Elevate Cannabis-W3a	20.3	NO INFO
Harambe C&D- w16b	19.7	NO INFO														Super Lemon Haze by Legends-W3a	20.3	1.9
Plane Wreck NW Pearl- w16b	19.7	NO INFO														Lemon Banana Sherbert- W8a	20.3	0.2
Holy Trinity 1g Pre-Roll Cut Above- w16b	19.7	0.4														Gorilla the OG- W8a	20.3	NO INFO
Mendo Breath Pre-Roll 1g Liberty Reach - w16b	19.7	No INFO														Purple Clementine- W8a	20.3	0.3
Lodi Dodi by Soulshine Cannabis- W19a	19.7	NO INFO														Amensia- W10	20.3	NO INFO
Double Dream- W26	19.7	NO INFO														Alaskan Thunder Fuck- W11	20.3	0.2
Jagoo- W27	19.7	0														Sherbert- W11	20.3	0.35
Grapefruit x NPH- W13b	19.7	NO INFO														Artizen Gooberry VZLS- W13a	20.3	NO INFO
Strawberry Cough by Moani-W3a	19.8	NO INFO														Acapulco Gold Red Frog- w16b	20.3	NO INFO
Blackberry Kush by El Ella -W3a	19.8	NO INFO														Blue Dream Jackpot Seaweed- w16b	20.3	NO INFO
Bubblicious by Heavenly Buds-W3a	19.8	NO INFO														Blue Sugar Cookies High Five Farms- w16b	20.3	0.4
Lemonberry Popcorn Buds by Artizen -W3a	19.8	0.3														Cherry Pie Popcorn Red Frog- w16b	20.3	NO INFO
Chernobyl #4- W11	19.8	0.8														Lemon Maramlade Platinum Gardens- w16b	20.3	NO INFO
Kosher Kush- W11	19.8	0.1														Orange Valley OG Forte Farms- w16b	20.3	0.2
Walden Ewok 7190-W13a	19.8	0.5														Purple Kush Dream City- w16b	20.3	NO INFO
Pineapple Chunk Forte Farms- w16b	19.8	NO INFO														Space Queen Artizen- w16b	20.3	NO INFO
Training Day Liberty Reach- w16b	19.8	NO INFO														Berry White 1g. Pre-roll Forte- w16b	20.3	0.4
The Pineapple .5g Pre-roll Artizen- w16b	19.8	NO INFO														Jilly Bean Pre-Roll 1g Lazy Bee- w16b	20.3	0.6
9 lb Hammer- W26	19.8	0.5														Royal Kush .5G Preroll Soulshine- w16b	20.3	NO INFO
Bubba Crack- W26	19.8	0.5														Dutch Haze by Falcanna- W19a	20.3	No INFO
Loaded Pipe Bubba Crack- W26	19.8	0.5														Goji OG by From the Soil- W19a	20.3	No INFO
E E Blackberry Stomper Shake- W31	19.8	0.2														Raskal Berries Joint by Phat Panda (Preroll)- W19	20.3	NO INFO
Hindu K- W13b	19.8	NO INFO														Hazy Train- W26	20.3	NO INFO
Hinu K- W13b	19.8	NO INFO														Sour Candy Preroll- W26	20.3	0.6
Locktite- W13b	19.8	NO INFO														Trinity- W27	20.3	0
Pineapple Expres- 28's Pounder-W13b	19.8	NO INFO														Super Lemon Haze- W27	20.3	0
Pineapple Express- Dubshot- W13b	19.8	NO INFO														Trinity (preroll)- W13b	20.3	NO INFO
Kush Wreck -'s Pounder- W13b	19.8	0.5														LA Confidential by Dama-W3a	20.4	0.3
Locktite Preroll- W13b	19.8	NO INFO														Sour Cookies by WEED-W3a	20.4	NO INFO
Fruity Pebbles- W38	19.8	NO INFO														Cinex Shake by Hempkings-W3a	20.4	NO INFO
Jack Herer- W38	19.8	NO INFO														Columbian Gold- W8a	20.4	NO INFO
Day & Night PreRoll GSC/ God's Gift- W38	19.8	NO INFO														Strawberry Banana Sherbert- W8a	20.4	0.2
Gnub indica (preroll)- W38	19.8	0.2														AHOT- W8a	20.4	0.2
Gstik Naturals Hybrid (preroll)- W38	19.8	NO INFO														9lb Hammer- W11	20.4	0
Northwest Pineapple- W10	19.84	NO INFO														Northern Lights- W11	20.4	0
Sun Lounger by Mother Nature's Own-W3a	19.9	0.2														509 Kush- W15	20.4	NO INFO
Alien Skunk OG by Dawg Star-W3a	19.9	NO INFO														Durban Poison- W15	20.4	NO INFO
XO Metal Haze- W5	19.9	NO INFO														ATF NW Grown- w16b	20.4	NO INFO
Pineapple Express- W8a	19.9	0.3														Goji OG FTS- w16b	20.4	NO INFO
Blue Dream Flower- W11	19.9	1.1														MK Ultra Virgina Company-w16b	20.4	NO INFO
Carnival Kush- W11	19.9	0.1														Chunky Cherry Malawi 1g Pre-roll High Five Farms- w16b	20.4	0.4
FF Dragon Berry AQRH- W13a	19.9	0.5														Sugar Babies Chunky Diesel- W26	20.4	0.5
FF Dragon Berry Aqul- W13a	19.9	0.5														Super Lemon Haze- W26	20.4	NO INFO
Gas Chamber Forte- w16b	19.9	NO INFO														Primus- W27	20.4	0
God's Gift 1937 Farms- w16b	19.9	NO INFO														Amnesia Haze Preroll- W31	20.4	0.2
Mendo Afgoo Top Shelf- w16b	19.9	NO INFO														Gabriel Sherbet Preroll- W31	20.4	NO INFO
Mendo Breath Liberty Reach- w16b	19.9	NO INFO														Purple Lemon Haze- W13b	20.4	0.6
Orange Velvet Sonic Green- w16b	19.9	0.2														I 95- W13b	20.4	No INFO
Star Dawg Popcorn Artizen- w16b	19.9	0.2														NYC Chem- W13b	20.4	NO INFO
LA Sour Diesel by U.S. Cannabis- W19a	19.9	No INFO														Blueberry Headband- W13b	20.4	0.7
Cherry Lemonade Preroll- W27	19.9	0														Orange Kush by Badass Grass -W3a	20.42	No INFO
GDP Preroll- W13b	19.9	0.4														LA Sour - W10	20.47	NO INFO
Chocolate Chunk- W38	19.9	NO INFO														Allen Wrench Popcorn Buds by Artizen -W3a	20.5	0.3
[truncated: 1,775 more rows]

## Sheet: California
Strain	THC	CBD		Strain < 5%	THC	CBD		Strain 5 - 10% THC	THC	CBD		Strain 10-15% THC	THC	CBD		Strain > 15% THC	THC	CBD
[truncated: 609 more rows]

[truncated: 1 more sheets: KEY]
